# Supplementary material
Source: publisher figshare collection journal article supplement (https://acs.figshare.com/ndownloader/files/8277899)
Supplement: Supplementary file 1 [file 8277899]

 
data_shelx
 
_audit_creation_method            'SHELXL-2016/6'
_shelx_SHELXL_version_number      '2016/6'
_chemical_name_systematic         ?
_chemical_name_common             ?
_chemical_melting_point           ?
_chemical_formula_moiety          ?
_chemical_formula_sum
 'C28 H28 N2 O10' 
_chemical_formula_weight          552.52

loop_
 _atom_type_symbol
 _atom_type_description
 _atom_type_scat_dispersion_real
 _atom_type_scat_dispersion_imag
 _atom_type_scat_source
 'C'  'C'   0.0181   0.0091
 'International Tables Vol C Tables 4.2.6.8 and 6.1.1.4'
 'H'  'H'   0.0000   0.0000
 'International Tables Vol C Tables 4.2.6.8 and 6.1.1.4'
 'N'  'N'   0.0311   0.0180
 'International Tables Vol C Tables 4.2.6.8 and 6.1.1.4'
 'O'  'O'   0.0492   0.0322
 'International Tables Vol C Tables 4.2.6.8 and 6.1.1.4'
 
_space_group_crystal_system       triclinic
_space_group_IT_number            1
_space_group_name_H-M_alt         'P 1'
_space_group_name_Hall            'P 1'
 
_shelx_space_group_comment
;
The symmetry employed for this shelxl refinement is uniquely defined
by the following loop, which should always be used as a source of
symmetry information in preference to the above space-group names.
They are only intended as comments.
;
 
loop_
 _space_group_symop_operation_xyz
 'x, y, z'
 
_cell_length_a                    7.3394(5)
_cell_length_b                    12.4108(8)
_cell_length_c                    14.7998(13)
_cell_angle_alpha                 107.312(5)
_cell_angle_beta                  100.068(5)
_cell_angle_gamma                 91.140(5)
_cell_volume                      1263.48(17)
_cell_formula_units_Z             2
_cell_measurement_temperature     100(2)
_cell_measurement_reflns_used     9884
_cell_measurement_theta_min       3.2
_cell_measurement_theta_max       78.3
 
_exptl_crystal_description        platelett
_exptl_crystal_colour             colourless
_exptl_crystal_density_meas       ?
_exptl_crystal_density_method     ?
_exptl_crystal_density_diffrn     1.452          
_exptl_crystal_F_000              580
_exptl_transmission_factor_min    ?
_exptl_transmission_factor_max    ?
_exptl_crystal_size_max           0.240
_exptl_crystal_size_mid           0.100
_exptl_crystal_size_min           0.030
_exptl_absorpt_coefficient_mu     0.937
_shelx_estimated_absorpt_T_min    0.806
_shelx_estimated_absorpt_T_max    0.972
_exptl_absorpt_correction_type    multi-scan
_exptl_absorpt_correction_T_min   0.590
_exptl_absorpt_correction_T_max   0.6612
_exptl_absorpt_process_details    'SADABS (Bruker-AXS)'
_exptl_absorpt_special_details    ?
_diffrn_ambient_temperature       100(2)
_diffrn_radiation_wavelength      1.54178
_diffrn_radiation_type            CuK\a
_diffrn_source                    'Incoatec Microfocus Source' 
_diffrn_measurement_device_type   'Bruker D8 Venture Photon'
_diffrn_measurement_method        '\f and \w scans'
_diffrn_detector_area_resol_mean  ?
_diffrn_reflns_number             30979
_diffrn_reflns_av_unetI/netI      0.0308
_diffrn_reflns_av_R_equivalents   0.0313
_diffrn_reflns_limit_h_min        -8
_diffrn_reflns_limit_h_max        8
_diffrn_reflns_limit_k_min        -14
_diffrn_reflns_limit_k_max        14
_diffrn_reflns_limit_l_min        -17
_diffrn_reflns_limit_l_max        17
_diffrn_reflns_theta_min          3.185
_diffrn_reflns_theta_max          68.384
_diffrn_reflns_theta_full         67.679
_diffrn_measured_fraction_theta_max   0.996
_diffrn_measured_fraction_theta_full  0.998
_diffrn_reflns_Laue_measured_fraction_max    0.996
_diffrn_reflns_Laue_measured_fraction_full   0.998
_diffrn_reflns_point_group_measured_fraction_max   0.960
_diffrn_reflns_point_group_measured_fraction_full  0.963
_reflns_number_total              8895
_reflns_number_gt                 8234
_reflns_threshold_expression      'I > 2\s(I)'
_reflns_Friedel_coverage          0.926
_reflns_Friedel_fraction_max      0.923
_reflns_Friedel_fraction_full     0.928
 
_reflns_special_details
;
 Reflections were merged by SHELXL according to the crystal
 class for the calculation of statistics and refinement.
 
 _reflns_Friedel_fraction is defined as the number of unique
 Friedel pairs measured divided by the number that would be
 possible theoretically, ignoring centric projections and
 systematic absences.
;
 
_computing_data_collection       'Bruker APEX2'
_computing_cell_refinement       'Bruker SAINT'
_computing_data_reduction        'Bruker SAINT'
_computing_structure_solution     'SHELXT 2014/5 (Sheldrick, 2014)'
_computing_structure_refinement 'SHELXL-2016/6 (Sheldrick, 2016)'
_computing_molecular_graphics     ?
_computing_publication_material   ?
_refine_special_details           ?
_refine_ls_structure_factor_coef  Fsqd
_refine_ls_matrix_type            full
_refine_ls_weighting_scheme       calc
_refine_ls_weighting_details
'w=1/[\s^2^(Fo^2^)+(0.0729P)^2^+0.8099P] where P=(Fo^2^+2Fc^2^)/3'
_atom_sites_solution_primary      ?
_atom_sites_solution_secondary    ?
_atom_sites_solution_hydrogens    geom
_refine_ls_hydrogen_treatment     constr
_refine_ls_extinction_method      none
_refine_ls_extinction_coef        .
_refine_ls_abs_structure_details
;
 Flack x determined using 3598 quotients [(I+)-(I-)]/[(I+)+(I-)]
 (Parsons, Flack and Wagner, Acta Cryst. B69 (2013) 249-259).
;
_refine_ls_abs_structure_Flack    0.12(6)
_chemical_absolute_configuration  ad
_refine_ls_number_reflns          8895
_refine_ls_number_parameters      721
_refine_ls_number_restraints      3
_refine_ls_R_factor_all           0.0510
_refine_ls_R_factor_gt            0.0466
_refine_ls_wR_factor_ref          0.1261
_refine_ls_wR_factor_gt           0.1219
_refine_ls_goodness_of_fit_ref    1.037
_refine_ls_restrained_S_all       1.037
_refine_ls_shift/su_max           0.000
_refine_ls_shift/su_mean          0.000
 
loop_
 _atom_site_label
 _atom_site_type_symbol
 _atom_site_fract_x
 _atom_site_fract_y
 _atom_site_fract_z
 _atom_site_U_iso_or_equiv
 _atom_site_adp_type
 _atom_site_occupancy
 _atom_site_site_symmetry_order  
 _atom_site_calc_flag
 _atom_site_refinement_flags_posn
 _atom_site_refinement_flags_adp
 _atom_site_refinement_flags_occupancy
 _atom_site_disorder_assembly
 _atom_site_disorder_group
C1A C 0.4258(7) 0.6713(4) 0.1888(3) 0.0279(10) Uani 1 1 d . . . . .
C1B C 0.6851(6) 0.2710(3) 0.8332(3) 0.0186(9) Uani 1 1 d . . . . .
C2A C 0.5766(7) 0.6198(4) 0.1354(3) 0.0310(11) Uani 1 1 d . . . . .
H6A1 H 0.520310 0.577107 0.067928 0.037 Uiso 1 1 calc R U . . .
H6A2 H 0.638813 0.565959 0.166039 0.037 Uiso 1 1 calc R U . . .
C2B C 0.7210(7) 0.2509(4) 0.9324(3) 0.0274(10) Uani 1 1 d . . . . .
H6B1 H 0.850882 0.231744 0.947088 0.033 Uiso 1 1 calc R U . . .
H6B2 H 0.704952 0.321606 0.982460 0.033 Uiso 1 1 calc R U . . .
C3A C 0.7231(6) 0.7130(4) 0.1362(3) 0.0287(9) Uani 1 1 d . . . . .
H5A1 H 0.817003 0.677042 0.098723 0.034 Uiso 1 1 calc R U . . .
H5A2 H 0.787412 0.750626 0.203323 0.034 Uiso 1 1 calc R U . . .
C3B C 0.5912(6) 0.1563(4) 0.9366(3) 0.0237(9) Uani 1 1 d . . . . .
H5B1 H 0.616835 0.148205 1.002098 0.028 Uiso 1 1 calc R U . . .
H5B2 H 0.614281 0.083987 0.890551 0.028 Uiso 1 1 calc R U . . .
C4A C 0.6333(6) 0.8040(4) 0.0925(3) 0.0247(10) Uani 1 1 d . . . . .
C4B C 0.3876(7) 0.1804(4) 0.9118(3) 0.0233(10) Uani 1 1 d . . . . .
C5A C 0.4850(7) 0.8540(4) 0.1441(3) 0.0298(10) Uani 1 1 d . . . . .
H3A1 H 0.417244 0.901638 0.108494 0.036 Uiso 1 1 calc R U . . .
H3A2 H 0.544642 0.904822 0.208380 0.036 Uiso 1 1 calc R U . . .
C5B C 0.3436(6) 0.1970(3) 0.8140(3) 0.0197(8) Uani 1 1 d . . . . .
H3B1 H 0.216318 0.222062 0.804409 0.024 Uiso 1 1 calc R U . . .
H3B2 H 0.344714 0.123221 0.764403 0.024 Uiso 1 1 calc R U . . .
C6A C 0.3388(6) 0.7697(4) 0.1590(3) 0.0278(10) Uani 1 1 d . . . . .
C6B C 0.4785(6) 0.2839(3) 0.7979(3) 0.0192(8) Uani 1 1 d . . . . .
C7A C 0.2599(6) 0.8333(3) 0.2474(3) 0.0183(9) Uani 1 1 d . . . . .
H12A H 0.239770 0.912172 0.248086 0.022 Uiso 1 1 calc R U . . .
H12B H 0.140454 0.795204 0.247897 0.022 Uiso 1 1 calc R U . . .
C7B C 0.4698(6) 0.2607(4) 0.6899(3) 0.0206(9) Uani 1 1 d . . . . .
H12C H 0.340252 0.241886 0.654111 0.025 Uiso 1 1 calc R U . . .
H12D H 0.522616 0.326994 0.676383 0.025 Uiso 1 1 calc R U . . .
C8A C 0.4052(6) 0.8309(3) 0.3328(3) 0.0163(9) Uani 1 1 d . . . . .
H11A H 0.500604 0.895864 0.349270 0.020 Uiso 1 1 calc R U . . .
C8B C 0.5860(6) 0.1601(3) 0.6629(3) 0.0169(9) Uani 1 1 d . . . . .
H11B H 0.506332 0.088351 0.647553 0.020 Uiso 1 1 calc R U . . .
C9A C 0.4962(6) 0.7178(4) 0.3002(3) 0.0218(9) Uani 1 1 d . . . . .
H10C H 0.457629 0.664016 0.332340 0.026 Uiso 1 1 calc R U . . .
H10D H 0.633244 0.730447 0.315640 0.026 Uiso 1 1 calc R U . . .
C9B C 0.7393(6) 0.1711(4) 0.7523(3) 0.0198(9) Uani 1 1 d . . . . .
H10A H 0.863035 0.188254 0.739791 0.024 Uiso 1 1 calc R U . . .
H10B H 0.740855 0.100359 0.770370 0.024 Uiso 1 1 calc R U . . .
C10A C 0.1968(8) 0.7195(5) 0.0673(3) 0.0389(13) Uani 1 1 d . . . . .
H9A1 H 0.247237 0.723609 0.010511 0.047 Uiso 1 1 calc R U . . .
H9A2 H 0.082568 0.760522 0.069696 0.047 Uiso 1 1 calc R U . . .
C10B C 0.4506(7) 0.4058(4) 0.8519(3) 0.0276(10) Uani 1 1 d . . . . .
H9B1 H 0.430393 0.412392 0.917631 0.033 Uiso 1 1 calc R U . . .
H9B2 H 0.342539 0.433203 0.817174 0.033 Uiso 1 1 calc R U . . .
C11A C 0.1549(7) 0.5927(4) 0.0621(3) 0.0373(11) Uani 1 1 d . . . . .
H8A1 H 0.020236 0.575743 0.056444 0.045 Uiso 1 1 calc R U . . .
H8A2 H 0.196471 0.540626 0.005881 0.045 Uiso 1 1 calc R U . . .
C11B C 0.6308(7) 0.4738(4) 0.8559(3) 0.0307(10) Uani 1 1 d . . . . .
H8B1 H 0.617017 0.507199 0.802272 0.037 Uiso 1 1 calc R U . . .
H8B2 H 0.663345 0.535589 0.917651 0.037 Uiso 1 1 calc R U . . .
C12A C 0.2602(7) 0.5804(4) 0.1536(3) 0.0301(11) Uani 1 1 d . . . . .
H7A H 0.308136 0.503461 0.140667 0.036 Uiso 1 1 calc R U . . .
C12B C 0.7805(6) 0.3890(4) 0.8467(3) 0.0220(9) Uani 1 1 d . . . . .
H7B H 0.878360 0.411435 0.906534 0.026 Uiso 1 1 calc R U . . .
C13A C 0.7853(8) 0.8921(4) 0.0055(3) 0.0273(10) Uani 1 1 d . . . . .
H13A H 0.915472 0.906706 0.000167 0.033 Uiso 1 1 calc R U . . .
H13B H 0.709785 0.950515 -0.012233 0.033 Uiso 1 1 calc R U . . .
C13B C 0.2844(7) 0.2254(4) 1.0557(3) 0.0250(10) Uani 1 1 d . . . . .
H13C H 0.183179 0.266160 1.083965 0.030 Uiso 1 1 calc R U . . .
H13D H 0.391685 0.230190 1.108006 0.030 Uiso 1 1 calc R U . . .
C14A C 0.7088(7) 0.7754(4) -0.0563(3) 0.0240(10) Uani 1 1 d . . . . .
H14A H 0.654473 0.774631 -0.122605 0.029 Uiso 1 1 calc R U . . .
H14B H 0.805939 0.720921 -0.059011 0.029 Uiso 1 1 calc R U . . .
C14B C 0.2200(9) 0.1034(4) 0.9996(4) 0.0368(13) Uani 1 1 d . . . . .
H14C H 0.281539 0.051842 1.033016 0.044 Uiso 1 1 calc R U . . .
H14D H 0.083971 0.090813 0.992847 0.044 Uiso 1 1 calc R U . . .
C15A C 0.0286(6) 0.5099(4) 0.2204(3) 0.0216(9) Uani 1 1 d . . . . .
C15B C 0.9726(6) 0.4781(4) 0.7719(3) 0.0223(9) Uani 1 1 d . . . . .
C16A C -0.0637(6) 0.5266(4) 0.3056(3) 0.0197(9) Uani 1 1 d . . . . .
C16B C 1.0568(6) 0.4671(4) 0.6846(3) 0.0194(9) Uani 1 1 d . . . . .
C17A C -0.0359(6) 0.6268(4) 0.3815(3) 0.0214(9) Uani 1 1 d . . . . .
H17A H 0.038661 0.688951 0.379010 0.026 Uiso 1 1 calc R U . . .
C17B C 1.0269(6) 0.3693(4) 0.6061(3) 0.0197(9) Uani 1 1 d . . . . .
H17B H 0.950549 0.306754 0.606410 0.024 Uiso 1 1 calc R U . . .
C18A C -0.1174(6) 0.6356(4) 0.4608(3) 0.0230(10) Uani 1 1 d . . . . .
H18A H -0.102022 0.704116 0.512656 0.028 Uiso 1 1 calc R U . . .
C18B C 1.1091(6) 0.3635(4) 0.5270(3) 0.0231(10) Uani 1 1 d . . . . .
H18B H 1.094290 0.296032 0.474053 0.028 Uiso 1 1 calc R U . . .
C19A C -0.2215(6) 0.5429(4) 0.4630(3) 0.0244(10) Uani 1 1 d . . . . .
C19B C 1.2116(6) 0.4565(4) 0.5270(3) 0.0206(9) Uani 1 1 d . . . . .
C20A C -0.2548(6) 0.4435(4) 0.3882(3) 0.0246(10) Uani 1 1 d . . . . .
H20A H -0.329428 0.381685 0.391080 0.030 Uiso 1 1 calc R U . . .
C20B C 1.2436(7) 0.5560(4) 0.6041(4) 0.0263(10) Uani 1 1 d . . . . .
H20B H 1.316150 0.619122 0.602023 0.032 Uiso 1 1 calc R U . . .
C21A C -0.1758(6) 0.4365(4) 0.3081(4) 0.0247(10) Uani 1 1 d . . . . .
H21A H -0.198656 0.369515 0.254590 0.030 Uiso 1 1 calc R U . . .
C21B C 1.1665(6) 0.5600(4) 0.6840(3) 0.0244(10) Uani 1 1 d . . . . .
H21B H 1.188168 0.626116 0.738340 0.029 Uiso 1 1 calc R U . . .
C22A C 0.4284(6) 0.8643(3) 0.5012(3) 0.0181(9) Uani 1 1 d . . . . .
C22B C 0.5655(6) 0.1287(3) 0.4956(3) 0.0152(8) Uani 1 1 d . . . . .
C23A C 0.3232(6) 0.8737(3) 0.5799(3) 0.0173(9) Uani 1 1 d . . . . .
C23B C 0.6754(6) 0.1219(3) 0.4174(3) 0.0146(8) Uani 1 1 d . . . . .
C24A C 0.4141(6) 0.8586(3) 0.6646(3) 0.0189(9) Uani 1 1 d . . . . .
H24A H 0.542383 0.846137 0.672614 0.023 Uiso 1 1 calc R U . . .
C24B C 0.8606(6) 0.0962(3) 0.4288(3) 0.0187(9) Uani 1 1 d . . . . .
H23B H 0.918726 0.081065 0.485862 0.022 Uiso 1 1 calc R U . . .
C25A C 0.3170(6) 0.8617(4) 0.7389(3) 0.0193(9) Uani 1 1 d . . . . .
H25A H 0.376942 0.850096 0.797225 0.023 Uiso 1 1 calc R U . . .
C25B C 0.9591(6) 0.0928(4) 0.3565(3) 0.0192(9) Uani 1 1 d . . . . .
H24B H 1.085212 0.075352 0.363016 0.023 Uiso 1 1 calc R U . . .
C26A C 0.1321(6) 0.8820(3) 0.7246(3) 0.0178(9) Uani 1 1 d . . . . .
C26B C 0.8695(6) 0.1156(3) 0.2740(3) 0.0154(8) Uani 1 1 d . . . . .
C27A C 0.0396(6) 0.9028(4) 0.6427(3) 0.0192(9) Uani 1 1 d . . . . .
H27A H -0.086324 0.920645 0.636691 0.023 Uiso 1 1 calc R U . . .
C27B C 0.6837(6) 0.1378(3) 0.2610(3) 0.0196(9) Uani 1 1 d . . . . .
H26B H 0.625135 0.151158 0.203205 0.023 Uiso 1 1 calc R U . . .
C28A C 0.1374(6) 0.8965(4) 0.5696(3) 0.0200(9) Uani 1 1 d . . . . .
H28A H 0.076473 0.907951 0.511361 0.024 Uiso 1 1 calc R U . . .
C28B C 0.5859(6) 0.1403(3) 0.3319(3) 0.0183(9) Uani 1 1 d . . . . .
H27B H 0.458222 0.154286 0.323486 0.022 Uiso 1 1 calc R U . . .
N1A N -0.2949(5) 0.5504(4) 0.5516(3) 0.0284(9) Uani 1 1 d . . . . .
N1B N 1.2861(5) 0.4532(4) 0.4404(3) 0.0264(9) Uani 1 1 d . . . . .
N2A N 0.0274(5) 0.8796(3) 0.8009(2) 0.0198(8) Uani 1 1 d . . . . .
N2B N 0.9766(5) 0.1192(3) 0.2000(2) 0.0192(8) Uani 1 1 d . . . . .
O1A O 0.7730(5) 0.8895(3) 0.1001(2) 0.0357(9) Uani 1 1 d . . . . .
O1B O 0.3367(4) 0.2713(2) 0.9839(2) 0.0249(7) Uani 1 1 d . . . . .
O2A O 0.5691(5) 0.7501(3) -0.0077(2) 0.0335(8) Uani 1 1 d . . . . .
O2B O 0.2688(6) 0.0841(3) 0.9088(2) 0.0419(10) Uani 1 1 d . . . . .
O3A O 0.1463(4) 0.5973(2) 0.2299(2) 0.0202(6) Uani 1 1 d . . . . .
O3B O 0.8643(4) 0.3849(3) 0.7627(2) 0.0217(7) Uani 1 1 d . . . . .
O4A O -0.0003(5) 0.4249(3) 0.1517(2) 0.0334(8) Uani 1 1 d . . . . .
O4B O 1.0009(5) 0.5604(3) 0.8415(2) 0.0316(8) Uani 1 1 d . . . . .
O5A O -0.2838(5) 0.6428(3) 0.6131(3) 0.0375(8) Uani 1 1 d . . . . .
O5B O 1.2762(5) 0.3613(4) 0.3769(3) 0.0392(9) Uani 1 1 d . . . . .
O6A O -0.3595(5) 0.4624(3) 0.5599(2) 0.0335(9) Uani 1 1 d . . . . .
O6B O 1.3517(5) 0.5420(3) 0.4341(3) 0.0344(9) Uani 1 1 d . . . . .
O7A O 0.3155(4) 0.8389(2) 0.4149(2) 0.0181(6) Uani 1 1 d . . . . .
O7B O 0.6761(4) 0.1570(2) 0.58170(19) 0.0170(6) Uani 1 1 d . . . . .
O8A O 0.5959(4) 0.8768(3) 0.5138(2) 0.0245(7) Uani 1 1 d . . . . .
O8B O 0.3988(4) 0.1102(3) 0.4807(2) 0.0221(7) Uani 1 1 d . . . . .
O9A O -0.1283(4) 0.9142(3) 0.7961(2) 0.0276(7) Uani 1 1 d . . . . .
O9B O 0.9003(5) 0.1528(3) 0.1335(2) 0.0262(7) Uani 1 1 d . . . . .
O10A O 0.1012(5) 0.8410(3) 0.8642(2) 0.0300(8) Uani 1 1 d . . . . .
O10B O 1.1362(4) 0.0906(3) 0.2086(2) 0.0265(7) Uani 1 1 d . . . . .
 
loop_
 _atom_site_aniso_label
 _atom_site_aniso_U_11
 _atom_site_aniso_U_22
 _atom_site_aniso_U_33
 _atom_site_aniso_U_23
 _atom_site_aniso_U_13
 _atom_site_aniso_U_12
C1A 0.038(3) 0.026(2) 0.018(2) 0.0027(17) 0.0084(18) 0.004(2)
C1B 0.019(2) 0.020(2) 0.0135(18) 0.0000(15) 0.0042(15) -0.0002(16)
C2A 0.027(2) 0.036(3) 0.024(2) 0.0004(19) 0.0028(18) 0.012(2)
C2B 0.033(3) 0.030(2) 0.017(2) 0.0067(17) 0.0016(18) 0.0038(19)
C3A 0.026(2) 0.031(2) 0.032(2) 0.0098(19) 0.0134(18) 0.0059(18)
C3B 0.033(2) 0.027(2) 0.0162(19) 0.0103(16) 0.0105(16) 0.0060(18)
C4A 0.023(2) 0.030(2) 0.017(2) -0.0016(18) 0.0069(17) -0.0107(18)
C4B 0.035(3) 0.017(2) 0.017(2) 0.0003(16) 0.0130(18) -0.0050(18)
C5A 0.041(3) 0.025(2) 0.026(2) 0.0077(18) 0.0126(19) 0.0041(19)
C5B 0.018(2) 0.023(2) 0.0149(18) 0.0004(15) 0.0053(14) -0.0044(15)
C6A 0.021(2) 0.043(3) 0.016(2) 0.0023(19) 0.0059(16) 0.010(2)
C6B 0.027(2) 0.0163(19) 0.0141(18) 0.0041(15) 0.0052(16) 0.0040(16)
C7A 0.022(2) 0.018(2) 0.017(2) 0.0055(17) 0.0108(17) 0.0017(17)
C7B 0.026(2) 0.026(2) 0.0125(19) 0.0061(16) 0.0087(16) 0.0044(18)
C8A 0.015(2) 0.019(2) 0.0140(19) 0.0029(16) 0.0059(16) -0.0028(17)
C8B 0.022(2) 0.017(2) 0.0120(19) 0.0019(16) 0.0087(16) -0.0014(17)
C9A 0.024(2) 0.027(2) 0.018(2) 0.0094(17) 0.0064(17) 0.0109(18)
C9B 0.018(2) 0.025(2) 0.018(2) 0.0080(18) 0.0042(17) 0.0061(18)
C10A 0.049(3) 0.048(3) 0.021(2) 0.013(2) 0.003(2) 0.022(3)
C10B 0.032(3) 0.026(2) 0.020(2) -0.0013(18) 0.0061(18) 0.0099(19)
C11A 0.039(3) 0.041(3) 0.027(2) 0.007(2) 0.000(2) -0.006(2)
C11B 0.044(3) 0.015(2) 0.035(2) 0.0014(17) 0.023(2) 0.0007(18)
C12A 0.033(3) 0.031(3) 0.020(2) -0.0026(19) 0.0071(18) -0.012(2)
C12B 0.028(2) 0.026(2) 0.0117(19) 0.0006(16) 0.0130(17) -0.0081(18)
C13A 0.043(3) 0.020(2) 0.022(2) 0.0061(18) 0.017(2) 0.004(2)
C13B 0.032(3) 0.030(2) 0.016(2) 0.0079(18) 0.0091(18) 0.002(2)
C14A 0.031(3) 0.028(2) 0.018(2) 0.0077(18) 0.0135(18) 0.002(2)
C14B 0.065(4) 0.028(3) 0.029(3) 0.013(2) 0.033(3) 0.001(3)
C15A 0.017(2) 0.022(2) 0.023(2) 0.0018(19) 0.0071(17) -0.0004(18)
C15B 0.020(2) 0.020(2) 0.027(2) 0.0075(19) 0.0028(18) -0.0051(18)
C16A 0.014(2) 0.019(2) 0.027(2) 0.0080(18) 0.0052(17) 0.0030(17)
C16B 0.016(2) 0.021(2) 0.021(2) 0.0060(18) 0.0048(17) -0.0002(17)
C17A 0.014(2) 0.019(2) 0.030(2) 0.0078(19) 0.0024(17) -0.0028(17)
C17B 0.020(2) 0.021(2) 0.021(2) 0.0091(18) 0.0083(17) 0.0007(18)
C18A 0.019(2) 0.021(2) 0.028(2) 0.0038(19) 0.0081(18) -0.0018(18)
C18B 0.021(2) 0.028(2) 0.019(2) 0.0049(18) 0.0046(17) 0.0041(19)
C19A 0.015(2) 0.033(3) 0.029(2) 0.011(2) 0.0090(18) 0.0079(18)
C19B 0.016(2) 0.028(2) 0.025(2) 0.0170(19) 0.0056(17) 0.0037(18)
C20A 0.020(2) 0.022(2) 0.036(3) 0.013(2) 0.0088(19) 0.0002(18)
C20B 0.021(2) 0.024(2) 0.038(3) 0.014(2) 0.010(2) 0.0011(19)
C21A 0.021(2) 0.019(2) 0.033(3) 0.0047(19) 0.0095(19) 0.0014(19)
C21B 0.022(2) 0.022(2) 0.031(3) 0.010(2) 0.0083(19) -0.0030(19)
C22A 0.024(2) 0.0116(19) 0.015(2) 0.0004(16) 0.0015(17) -0.0025(17)
C22B 0.018(2) 0.0143(19) 0.0129(19) 0.0014(15) 0.0073(16) -0.0033(16)
C23A 0.021(2) 0.0106(19) 0.017(2) -0.0016(15) 0.0060(16) -0.0014(16)
C23B 0.018(2) 0.0125(19) 0.0119(18) 0.0001(15) 0.0051(15) -0.0062(16)
C24A 0.019(2) 0.017(2) 0.020(2) 0.0043(17) 0.0049(17) -0.0018(17)
C24B 0.023(2) 0.018(2) 0.015(2) 0.0031(16) 0.0053(17) 0.0020(17)
C25A 0.026(2) 0.021(2) 0.0135(19) 0.0054(17) 0.0099(17) 0.0053(18)
C25B 0.016(2) 0.020(2) 0.020(2) 0.0025(18) 0.0058(17) 0.0000(17)
C26A 0.024(2) 0.0123(19) 0.015(2) 0.0005(16) 0.0073(17) -0.0031(17)
C26B 0.021(2) 0.0100(18) 0.015(2) 0.0012(15) 0.0099(16) -0.0021(16)
C27A 0.020(2) 0.019(2) 0.017(2) 0.0009(17) 0.0076(17) 0.0000(18)
C27B 0.023(2) 0.018(2) 0.017(2) 0.0062(17) 0.0000(17) -0.0021(17)
C28A 0.023(2) 0.021(2) 0.015(2) 0.0053(17) 0.0028(17) -0.0013(18)
C28B 0.020(2) 0.018(2) 0.015(2) 0.0004(16) 0.0058(16) -0.0013(17)
N1A 0.016(2) 0.039(2) 0.039(2) 0.021(2) 0.0098(17) 0.0087(17)
N1B 0.019(2) 0.041(2) 0.026(2) 0.0179(19) 0.0070(16) 0.0069(18)
N2A 0.027(2) 0.0145(17) 0.0200(18) 0.0030(14) 0.0130(15) -0.0010(15)
N2B 0.024(2) 0.0176(18) 0.0154(17) 0.0041(14) 0.0056(14) -0.0032(15)
O1A 0.048(2) 0.0353(18) 0.0202(16) -0.0024(14) 0.0182(14) -0.0229(16)
O1B 0.0344(17) 0.0226(15) 0.0194(14) 0.0034(11) 0.0152(12) -0.0001(13)
O2A 0.044(2) 0.0336(17) 0.0187(15) -0.0021(13) 0.0151(14) -0.0100(15)
O2B 0.068(3) 0.0313(18) 0.0231(17) -0.0066(14) 0.0296(17) -0.0273(17)
O3A 0.0196(15) 0.0202(15) 0.0195(15) 0.0036(12) 0.0054(12) -0.0063(12)
O3B 0.0248(16) 0.0235(16) 0.0170(14) 0.0032(12) 0.0103(12) -0.0060(13)
O4A 0.034(2) 0.0252(18) 0.0340(19) -0.0057(15) 0.0153(15) -0.0087(15)
O4B 0.036(2) 0.0277(18) 0.0265(18) -0.0002(15) 0.0112(14) -0.0128(15)
O5A 0.039(2) 0.045(2) 0.0307(18) 0.0079(17) 0.0178(15) 0.0060(17)
O5B 0.036(2) 0.052(2) 0.0337(19) 0.0120(18) 0.0170(16) 0.0047(17)
O6A 0.0228(18) 0.049(2) 0.044(2) 0.0315(18) 0.0138(16) 0.0065(16)
O6B 0.0201(18) 0.051(2) 0.048(2) 0.0361(19) 0.0088(15) 0.0080(16)
O7A 0.0190(15) 0.0200(15) 0.0148(14) 0.0011(12) 0.0095(11) -0.0035(12)
O7B 0.0185(15) 0.0203(15) 0.0106(13) 0.0013(11) 0.0056(11) -0.0046(12)
O8A 0.0193(17) 0.0328(18) 0.0215(16) 0.0058(13) 0.0093(12) -0.0028(13)
O8B 0.0188(17) 0.0293(17) 0.0159(15) 0.0030(13) 0.0045(12) -0.0051(13)
O9A 0.0245(17) 0.0356(18) 0.0276(17) 0.0100(14) 0.0168(14) 0.0063(14)
O9B 0.0338(19) 0.0290(17) 0.0217(16) 0.0126(14) 0.0125(13) 0.0031(14)
O10A 0.040(2) 0.0346(19) 0.0251(17) 0.0175(15) 0.0155(15) 0.0095(16)
O10B 0.0220(17) 0.0331(17) 0.0275(16) 0.0098(14) 0.0120(13) 0.0045(14)
 
_geom_special_details
;
 All esds (except the esd in the dihedral angle between two l.s. planes)
 are estimated using the full covariance matrix.  The cell esds are taken
 into account individually in the estimation of esds in distances, angles
 and torsion angles; correlations between esds in cell parameters are only
 used when they are defined by crystal symmetry.  An approximate (isotropic)
 treatment of cell esds is used for estimating esds involving l.s. planes.
;
 
loop_
 _geom_bond_atom_site_label_1
 _geom_bond_atom_site_label_2
 _geom_bond_distance
 _geom_bond_site_symmetry_2
 _geom_bond_publ_flag
C1A C2A 1.514(6) . ?
C1A C6A 1.533(6) . ?
C1A C12A 1.548(7) . ?
C1A C9A 1.562(6) . ?
C1B C2B 1.540(6) . ?
C1B C6B 1.544(6) . ?
C1B C12B 1.553(6) . ?
C1B C9B 1.559(6) . ?
C2A C3A 1.560(7) . ?
C2A H6A1 0.9900 . ?
C2A H6A2 0.9900 . ?
C2B C3B 1.520(6) . ?
C2B H6B1 0.9900 . ?
C2B H6B2 0.9900 . ?
C3A C4A 1.562(7) . ?
C3A H5A1 0.9900 . ?
C3A H5A2 0.9900 . ?
C3B C4B 1.532(6) . ?
C3B H5B1 0.9900 . ?
C3B H5B2 0.9900 . ?
C4A O2A 1.421(5) . ?
C4A O1A 1.426(6) . ?
C4A C5A 1.480(6) . ?
C4B O1B 1.411(5) . ?
C4B O2B 1.451(6) . ?
C4B C5B 1.503(6) . ?
C5A C6A 1.571(7) . ?
C5A H3A1 0.9900 . ?
C5A H3A2 0.9900 . ?
C5B C6B 1.547(6) . ?
C5B H3B1 0.9900 . ?
C5B H3B2 0.9900 . ?
C6A C10A 1.514(6) . ?
C6A C7A 1.529(6) . ?
C6B C10B 1.523(5) . ?
C6B C7B 1.526(5) . ?
C7A C8A 1.513(6) . ?
C7A H12A 0.9900 . ?
C7A H12B 0.9900 . ?
C7B C8B 1.520(6) . ?
C7B H12C 0.9900 . ?
C7B H12D 0.9900 . ?
C8A O7A 1.460(5) . ?
C8A C9A 1.548(6) . ?
C8A H11A 1.0000 . ?
C8B O7B 1.460(5) . ?
C8B C9B 1.550(5) . ?
C8B H11B 1.0000 . ?
C9A H10C 0.9900 . ?
C9A H10D 0.9900 . ?
C9B H10A 0.9900 . ?
C9B H10B 0.9900 . ?
C10A C11A 1.574(7) . ?
C10A H9A1 0.9900 . ?
C10A H9A2 0.9900 . ?
C10B C11B 1.537(7) . ?
C10B H9B1 0.9900 . ?
C10B H9B2 0.9900 . ?
C11A C12A 1.489(7) . ?
C11A H8A1 0.9900 . ?
C11A H8A2 0.9900 . ?
C11B C12B 1.532(6) . ?
C11B H8B1 0.9900 . ?
C11B H8B2 0.9900 . ?
C12A O3A 1.487(5) . ?
C12A H7A 1.0000 . ?
C12B O3B 1.468(5) . ?
C12B H7B 1.0000 . ?
C13A O1A 1.429(5) . ?
C13A C14A 1.499(7) . ?
C13A H13A 0.9900 . ?
C13A H13B 0.9900 . ?
C13B O1B 1.448(5) . ?
C13B C14B 1.514(7) . ?
C13B H13C 0.9900 . ?
C13B H13D 0.9900 . ?
C14A O2A 1.431(5) . ?
C14A H14A 0.9900 . ?
C14A H14B 0.9900 . ?
C14B O2B 1.405(5) . ?
C14B H14C 0.9900 . ?
C14B H14D 0.9900 . ?
C15A O4A 1.212(6) . ?
C15A O3A 1.331(6) . ?
C15A C16A 1.496(6) . ?
C15B O4B 1.200(6) . ?
C15B O3B 1.349(5) . ?
C15B C16B 1.499(6) . ?
C16A C21A 1.388(7) . ?
C16A C17A 1.389(6) . ?
C16B C17B 1.389(6) . ?
C16B C21B 1.397(6) . ?
C17A C18A 1.386(6) . ?
C17A H17A 0.9500 . ?
C17B C18B 1.392(6) . ?
C17B H17B 0.9500 . ?
C18A C19A 1.380(7) . ?
C18A H18A 0.9500 . ?
C18B C19B 1.366(7) . ?
C18B H18B 0.9500 . ?
C19A C20A 1.373(7) . ?
C19A N1A 1.482(6) . ?
C19B C20B 1.392(7) . ?
C19B N1B 1.469(6) . ?
C20A C21A 1.389(7) . ?
C20A H20A 0.9500 . ?
C20B C21B 1.386(7) . ?
C20B H20B 0.9500 . ?
C21A H21A 0.9500 . ?
C21B H21B 0.9500 . ?
C22A O8A 1.210(5) . ?
C22A O7A 1.340(5) . ?
C22A C23A 1.485(6) . ?
C22B O8B 1.210(5) . ?
C22B O7B 1.329(5) . ?
C22B C23B 1.506(5) . ?
C23A C24A 1.380(6) . ?
C23A C28A 1.390(6) . ?
C23B C24B 1.396(6) . ?
C23B C28B 1.404(6) . ?
C24A C25A 1.403(6) . ?
C24A H24A 0.9500 . ?
C24B C25B 1.384(6) . ?
C24B H23B 0.9500 . ?
C25A C26A 1.377(6) . ?
C25A H25A 0.9500 . ?
C25B C26B 1.390(6) . ?
C25B H24B 0.9500 . ?
C26A C27A 1.379(6) . ?
C26A N2A 1.479(5) . ?
C26B C27B 1.388(6) . ?
C26B N2B 1.466(5) . ?
C27A C28A 1.384(6) . ?
C27A H27A 0.9500 . ?
C27B C28B 1.365(6) . ?
C27B H26B 0.9500 . ?
C28A H28A 0.9500 . ?
C28B H27B 0.9500 . ?
N1A O5A 1.224(6) . ?
N1A O6A 1.229(5) . ?
N1B O6B 1.229(5) . ?
N1B O5B 1.236(6) . ?
N2A O10A 1.225(5) . ?
N2A O9A 1.227(5) . ?
N2B O10B 1.227(5) . ?
N2B O9B 1.232(5) . ?
 
loop_
 _geom_angle_atom_site_label_1
 _geom_angle_atom_site_label_2
 _geom_angle_atom_site_label_3
 _geom_angle
 _geom_angle_site_symmetry_1
 _geom_angle_site_symmetry_3
 _geom_angle_publ_flag
C2A C1A C6A 114.8(4) . . ?
C2A C1A C12A 105.7(4) . . ?
C6A C1A C12A 101.4(4) . . ?
C2A C1A C9A 112.5(4) . . ?
C6A C1A C9A 105.9(3) . . ?
C12A C1A C9A 116.3(4) . . ?
C2B C1B C6B 112.6(4) . . ?
C2B C1B C12B 107.2(3) . . ?
C6B C1B C12B 103.3(3) . . ?
C2B C1B C9B 112.8(3) . . ?
C6B C1B C9B 105.2(3) . . ?
C12B C1B C9B 115.5(3) . . ?
C1A C2A C3A 111.1(4) . . ?
C1A C2A H6A1 109.4 . . ?
C3A C2A H6A1 109.4 . . ?
C1A C2A H6A2 109.4 . . ?
C3A C2A H6A2 109.4 . . ?
H6A1 C2A H6A2 108.0 . . ?
C3B C2B C1B 112.4(4) . . ?
C3B C2B H6B1 109.1 . . ?
C1B C2B H6B1 109.1 . . ?
C3B C2B H6B2 109.1 . . ?
C1B C2B H6B2 109.1 . . ?
H6B1 C2B H6B2 107.8 . . ?
C2A C3A C4A 112.3(4) . . ?
C2A C3A H5A1 109.1 . . ?
C4A C3A H5A1 109.1 . . ?
C2A C3A H5A2 109.1 . . ?
C4A C3A H5A2 109.1 . . ?
H5A1 C3A H5A2 107.9 . . ?
C2B C3B C4B 111.1(3) . . ?
C2B C3B H5B1 109.4 . . ?
C4B C3B H5B1 109.4 . . ?
C2B C3B H5B2 109.4 . . ?
C4B C3B H5B2 109.4 . . ?
H5B1 C3B H5B2 108.0 . . ?
O2A C4A O1A 106.4(3) . . ?
O2A C4A C5A 113.5(4) . . ?
O1A C4A C5A 110.5(4) . . ?
O2A C4A C3A 107.3(4) . . ?
O1A C4A C3A 109.3(4) . . ?
C5A C4A C3A 109.8(4) . . ?
O1B C4B O2B 104.2(3) . . ?
O1B C4B C5B 112.0(4) . . ?
O2B C4B C5B 107.1(4) . . ?
O1B C4B C3B 112.4(4) . . ?
O2B C4B C3B 109.3(4) . . ?
C5B C4B C3B 111.3(3) . . ?
C4A C5A C6A 117.1(4) . . ?
C4A C5A H3A1 108.0 . . ?
C6A C5A H3A1 108.0 . . ?
C4A C5A H3A2 108.0 . . ?
C6A C5A H3A2 108.0 . . ?
H3A1 C5A H3A2 107.3 . . ?
C4B C5B C6B 114.6(3) . . ?
C4B C5B H3B1 108.6 . . ?
C6B C5B H3B1 108.6 . . ?
C4B C5B H3B2 108.6 . . ?
C6B C5B H3B2 108.6 . . ?
H3B1 C5B H3B2 107.6 . . ?
C10A C6A C7A 115.4(4) . . ?
C10A C6A C1A 107.5(4) . . ?
C7A C6A C1A 102.6(3) . . ?
C10A C6A C5A 110.7(4) . . ?
C7A C6A C5A 107.2(4) . . ?
C1A C6A C5A 113.3(4) . . ?
C10B C6B C7B 114.4(3) . . ?
C10B C6B C1B 104.1(3) . . ?
C7B C6B C1B 101.8(3) . . ?
C10B C6B C5B 112.9(3) . . ?
C7B C6B C5B 109.3(3) . . ?
C1B C6B C5B 113.9(3) . . ?
C8A C7A C6A 104.9(3) . . ?
C8A C7A H12A 110.8 . . ?
C6A C7A H12A 110.8 . . ?
C8A C7A H12B 110.8 . . ?
C6A C7A H12B 110.8 . . ?
H12A C7A H12B 108.8 . . ?
C8B C7B C6B 103.8(3) . . ?
C8B C7B H12C 111.0 . . ?
C6B C7B H12C 111.0 . . ?
C8B C7B H12D 111.0 . . ?
C6B C7B H12D 111.0 . . ?
H12C C7B H12D 109.0 . . ?
O7A C8A C7A 109.1(3) . . ?
O7A C8A C9A 112.4(3) . . ?
C7A C8A C9A 105.9(3) . . ?
O7A C8A H11A 109.8 . . ?
C7A C8A H11A 109.8 . . ?
C9A C8A H11A 109.8 . . ?
O7B C8B C7B 113.5(3) . . ?
O7B C8B C9B 108.2(3) . . ?
C7B C8B C9B 106.6(3) . . ?
O7B C8B H11B 109.5 . . ?
C7B C8B H11B 109.5 . . ?
C9B C8B H11B 109.5 . . ?
C8A C9A C1A 105.1(3) . . ?
C8A C9A H10C 110.7 . . ?
C1A C9A H10C 110.7 . . ?
C8A C9A H10D 110.7 . . ?
C1A C9A H10D 110.7 . . ?
H10C C9A H10D 108.8 . . ?
C8B C9B C1B 104.4(3) . . ?
C8B C9B H10A 110.9 . . ?
C1B C9B H10A 110.9 . . ?
C8B C9B H10B 110.9 . . ?
C1B C9B H10B 110.9 . . ?
H10A C9B H10B 108.9 . . ?
C6A C10A C11A 105.4(4) . . ?
C6A C10A H9A1 110.7 . . ?
C11A C10A H9A1 110.7 . . ?
C6A C10A H9A2 110.7 . . ?
C11A C10A H9A2 110.7 . . ?
H9A1 C10A H9A2 108.8 . . ?
C6B C10B C11B 105.0(4) . . ?
C6B C10B H9B1 110.7 . . ?
C11B C10B H9B1 110.7 . . ?
C6B C10B H9B2 110.7 . . ?
C11B C10B H9B2 110.7 . . ?
H9B1 C10B H9B2 108.8 . . ?
C12A C11A C10A 105.7(4) . . ?
C12A C11A H8A1 110.6 . . ?
C10A C11A H8A1 110.6 . . ?
C12A C11A H8A2 110.6 . . ?
C10A C11A H8A2 110.6 . . ?
H8A1 C11A H8A2 108.7 . . ?
C12B C11B C10B 105.7(3) . . ?
C12B C11B H8B1 110.6 . . ?
C10B C11B H8B1 110.6 . . ?
C12B C11B H8B2 110.6 . . ?
C10B C11B H8B2 110.6 . . ?
H8B1 C11B H8B2 108.7 . . ?
O3A C12A C11A 112.8(4) . . ?
O3A C12A C1A 109.1(3) . . ?
C11A C12A C1A 106.9(4) . . ?
O3A C12A H7A 109.3 . . ?
C11A C12A H7A 109.3 . . ?
C1A C12A H7A 109.3 . . ?
O3B C12B C11B 110.1(3) . . ?
O3B C12B C1B 109.6(3) . . ?
C11B C12B C1B 107.5(3) . . ?
O3B C12B H7B 109.8 . . ?
C11B C12B H7B 109.8 . . ?
C1B C12B H7B 109.8 . . ?
O1A C13A C14A 102.6(4) . . ?
O1A C13A H13A 111.2 . . ?
C14A C13A H13A 111.2 . . ?
O1A C13A H13B 111.2 . . ?
C14A C13A H13B 111.2 . . ?
H13A C13A H13B 109.2 . . ?
O1B C13B C14B 103.6(3) . . ?
O1B C13B H13C 111.0 . . ?
C14B C13B H13C 111.0 . . ?
O1B C13B H13D 111.0 . . ?
C14B C13B H13D 111.0 . . ?
H13C C13B H13D 109.0 . . ?
O2A C14A C13A 102.7(3) . . ?
O2A C14A H14A 111.2 . . ?
C13A C14A H14A 111.2 . . ?
O2A C14A H14B 111.2 . . ?
C13A C14A H14B 111.2 . . ?
H14A C14A H14B 109.1 . . ?
O2B C14B C13B 106.2(4) . . ?
O2B C14B H14C 110.5 . . ?
C13B C14B H14C 110.5 . . ?
O2B C14B H14D 110.5 . . ?
C13B C14B H14D 110.5 . . ?
H14C C14B H14D 108.7 . . ?
O4A C15A O3A 124.6(4) . . ?
O4A C15A C16A 122.9(4) . . ?
O3A C15A C16A 112.5(4) . . ?
O4B C15B O3B 124.7(4) . . ?
O4B C15B C16B 123.2(4) . . ?
O3B C15B C16B 112.1(4) . . ?
C21A C16A C17A 120.3(4) . . ?
C21A C16A C15A 117.7(4) . . ?
C17A C16A C15A 122.0(4) . . ?
C17B C16B C21B 120.4(4) . . ?
C17B C16B C15B 122.1(4) . . ?
C21B C16B C15B 117.4(4) . . ?
C18A C17A C16A 119.6(4) . . ?
C18A C17A H17A 120.2 . . ?
C16A C17A H17A 120.2 . . ?
C16B C17B C18B 119.7(4) . . ?
C16B C17B H17B 120.1 . . ?
C18B C17B H17B 120.1 . . ?
C19A C18A C17A 118.7(4) . . ?
C19A C18A H18A 120.7 . . ?
C17A C18A H18A 120.7 . . ?
C19B C18B C17B 118.7(4) . . ?
C19B C18B H18B 120.6 . . ?
C17B C18B H18B 120.6 . . ?
C20A C19A C18A 123.0(4) . . ?
C20A C19A N1A 118.9(4) . . ?
C18A C19A N1A 118.1(4) . . ?
C18B C19B C20B 123.0(4) . . ?
C18B C19B N1B 118.6(4) . . ?
C20B C19B N1B 118.3(4) . . ?
C19A C20A C21A 117.8(4) . . ?
C19A C20A H20A 121.1 . . ?
C21A C20A H20A 121.1 . . ?
C21B C20B C19B 118.0(4) . . ?
C21B C20B H20B 121.0 . . ?
C19B C20B H20B 121.0 . . ?
C16A C21A C20A 120.5(4) . . ?
C16A C21A H21A 119.7 . . ?
C20A C21A H21A 119.7 . . ?
C20B C21B C16B 120.0(4) . . ?
C20B C21B H21B 120.0 . . ?
C16B C21B H21B 120.0 . . ?
O8A C22A O7A 124.5(4) . . ?
O8A C22A C23A 123.8(4) . . ?
O7A C22A C23A 111.8(4) . . ?
O8B C22B O7B 125.3(4) . . ?
O8B C22B C23B 123.7(4) . . ?
O7B C22B C23B 111.0(3) . . ?
C24A C23A C28A 120.1(4) . . ?
C24A C23A C22A 118.4(4) . . ?
C28A C23A C22A 121.6(4) . . ?
C24B C23B C28B 120.7(4) . . ?
C24B C23B C22B 120.9(4) . . ?
C28B C23B C22B 118.3(4) . . ?
C23A C24A C25A 120.0(4) . . ?
C23A C24A H24A 120.0 . . ?
C25A C24A H24A 120.0 . . ?
C25B C24B C23B 119.6(4) . . ?
C25B C24B H23B 120.2 . . ?
C23B C24B H23B 120.2 . . ?
C26A C25A C24A 117.9(4) . . ?
C26A C25A H25A 121.1 . . ?
C24A C25A H25A 121.1 . . ?
C24B C25B C26B 118.6(4) . . ?
C24B C25B H24B 120.7 . . ?
C26B C25B H24B 120.7 . . ?
C25A C26A C27A 123.5(4) . . ?
C25A C26A N2A 117.9(4) . . ?
C27A C26A N2A 118.7(4) . . ?
C27B C26B C25B 122.1(4) . . ?
C27B C26B N2B 119.2(4) . . ?
C25B C26B N2B 118.7(4) . . ?
C26A C27A C28A 117.4(4) . . ?
C26A C27A H27A 121.3 . . ?
C28A C27A H27A 121.3 . . ?
C28B C27B C26B 119.4(4) . . ?
C28B C27B H26B 120.3 . . ?
C26B C27B H26B 120.3 . . ?
C27A C28A C23A 121.0(4) . . ?
C27A C28A H28A 119.5 . . ?
C23A C28A H28A 119.5 . . ?
C27B C28B C23B 119.5(4) . . ?
C27B C28B H27B 120.2 . . ?
C23B C28B H27B 120.2 . . ?
O5A N1A O6A 123.9(4) . . ?
O5A N1A C19A 118.4(4) . . ?
O6A N1A C19A 117.7(4) . . ?
O6B N1B O5B 123.5(4) . . ?
O6B N1B C19B 118.5(4) . . ?
O5B N1B C19B 118.0(4) . . ?
O10A N2A O9A 124.1(4) . . ?
O10A N2A C26A 117.5(4) . . ?
O9A N2A C26A 118.3(3) . . ?
O10B N2B O9B 124.2(4) . . ?
O10B N2B C26B 118.6(3) . . ?
O9B N2B C26B 117.3(4) . . ?
C4A O1A C13A 108.8(3) . . ?
C4B O1B C13B 107.2(3) . . ?
C4A O2A C14A 106.9(3) . . ?
C14B O2B C4B 108.5(4) . . ?
C15A O3A C12A 115.3(3) . . ?
C15B O3B C12B 115.0(3) . . ?
C22A O7A C8A 116.1(3) . . ?
C22B O7B C8B 115.9(3) . . ?
 
loop_
 _geom_torsion_atom_site_label_1
 _geom_torsion_atom_site_label_2
 _geom_torsion_atom_site_label_3
 _geom_torsion_atom_site_label_4
 _geom_torsion
 _geom_torsion_site_symmetry_1
 _geom_torsion_site_symmetry_2
 _geom_torsion_site_symmetry_3
 _geom_torsion_site_symmetry_4
 _geom_torsion_publ_flag
C6A C1A C2A C3A 49.9(5) . . . . ?
C12A C1A C2A C3A 160.7(4) . . . . ?
C9A C1A C2A C3A -71.3(5) . . . . ?
C6B C1B C2B C3B 50.3(5) . . . . ?
C12B C1B C2B C3B 163.3(3) . . . . ?
C9B C1B C2B C3B -68.5(5) . . . . ?
C1A C2A C3A C4A -56.8(5) . . . . ?
C1B C2B C3B C4B -57.3(5) . . . . ?
C2A C3A C4A O2A -68.1(4) . . . . ?
C2A C3A C4A O1A 177.0(3) . . . . ?
C2A C3A C4A C5A 55.6(5) . . . . ?
C2B C3B C4B O1B -69.4(4) . . . . ?
C2B C3B C4B O2B 175.4(3) . . . . ?
C2B C3B C4B C5B 57.2(5) . . . . ?
O2A C4A C5A C6A 71.4(5) . . . . ?
O1A C4A C5A C6A -169.3(4) . . . . ?
C3A C4A C5A C6A -48.7(5) . . . . ?
O1B C4B C5B C6B 75.7(5) . . . . ?
O2B C4B C5B C6B -170.6(3) . . . . ?
C3B C4B C5B C6B -51.1(5) . . . . ?
C2A C1A C6A C10A 80.6(5) . . . . ?
C12A C1A C6A C10A -32.8(4) . . . . ?
C9A C1A C6A C10A -154.6(4) . . . . ?
C2A C1A C6A C7A -157.3(4) . . . . ?
C12A C1A C6A C7A 89.3(4) . . . . ?
C9A C1A C6A C7A -32.5(5) . . . . ?
C2A C1A C6A C5A -42.0(5) . . . . ?
C12A C1A C6A C5A -155.4(3) . . . . ?
C9A C1A C6A C5A 82.7(4) . . . . ?
C4A C5A C6A C10A -78.3(5) . . . . ?
C4A C5A C6A C7A 155.0(4) . . . . ?
C4A C5A C6A C1A 42.6(5) . . . . ?
C2B C1B C6B C10B 80.0(4) . . . . ?
C12B C1B C6B C10B -35.3(4) . . . . ?
C9B C1B C6B C10B -156.9(3) . . . . ?
C2B C1B C6B C7B -160.9(3) . . . . ?
C12B C1B C6B C7B 83.8(3) . . . . ?
C9B C1B C6B C7B -37.7(4) . . . . ?
C2B C1B C6B C5B -43.4(4) . . . . ?
C12B C1B C6B C5B -158.7(3) . . . . ?
C9B C1B C6B C5B 79.8(4) . . . . ?
C4B C5B C6B C10B -73.6(5) . . . . ?
C4B C5B C6B C7B 157.9(4) . . . . ?
C4B C5B C6B C1B 44.9(5) . . . . ?
C10A C6A C7A C8A 156.8(4) . . . . ?
C1A C6A C7A C8A 40.2(4) . . . . ?
C5A C6A C7A C8A -79.4(4) . . . . ?
C10B C6B C7B C8B 154.1(4) . . . . ?
C1B C6B C7B C8B 42.5(4) . . . . ?
C5B C6B C7B C8B -78.2(4) . . . . ?
C6A C7A C8A O7A -153.4(3) . . . . ?
C6A C7A C8A C9A -32.3(4) . . . . ?
C6B C7B C8B O7B -150.6(3) . . . . ?
C6B C7B C8B C9B -31.6(4) . . . . ?
O7A C8A C9A C1A 130.5(4) . . . . ?
C7A C8A C9A C1A 11.6(4) . . . . ?
C2A C1A C9A C8A 139.4(4) . . . . ?
C6A C1A C9A C8A 13.2(5) . . . . ?
C12A C1A C9A C8A -98.5(4) . . . . ?
O7B C8B C9B C1B 130.2(3) . . . . ?
C7B C8B C9B C1B 7.8(4) . . . . ?
C2B C1B C9B C8B 141.6(4) . . . . ?
C6B C1B C9B C8B 18.6(4) . . . . ?
C12B C1B C9B C8B -94.7(4) . . . . ?
C7A C6A C10A C11A -95.8(5) . . . . ?
C1A C6A C10A C11A 18.0(5) . . . . ?
C5A C6A C10A C11A 142.2(4) . . . . ?
C7B C6B C10B C11B -72.7(5) . . . . ?
C1B C6B C10B C11B 37.5(4) . . . . ?
C5B C6B C10B C11B 161.5(4) . . . . ?
C6A C10A C11A C12A 4.8(5) . . . . ?
C6B C10B C11B C12B -24.5(5) . . . . ?
C10A C11A C12A O3A 94.2(5) . . . . ?
C10A C11A C12A C1A -25.7(5) . . . . ?
C2A C1A C12A O3A 153.7(4) . . . . ?
C6A C1A C12A O3A -86.2(4) . . . . ?
C9A C1A C12A O3A 28.1(5) . . . . ?
C2A C1A C12A C11A -84.1(5) . . . . ?
C6A C1A C12A C11A 36.0(5) . . . . ?
C9A C1A C12A C11A 150.4(4) . . . . ?
C10B C11B C12B O3B 121.7(4) . . . . ?
C10B C11B C12B C1B 2.3(4) . . . . ?
C2B C1B C12B O3B 141.5(4) . . . . ?
C6B C1B C12B O3B -99.4(4) . . . . ?
C9B C1B C12B O3B 14.9(5) . . . . ?
C2B C1B C12B C11B -98.8(4) . . . . ?
C6B C1B C12B C11B 20.3(4) . . . . ?
C9B C1B C12B C11B 134.6(4) . . . . ?
O1A C13A C14A O2A 34.3(4) . . . . ?
O1B C13B C14B O2B 9.9(6) . . . . ?
O4A C15A C16A C21A 5.0(6) . . . . ?
O3A C15A C16A C21A -173.9(4) . . . . ?
O4A C15A C16A C17A -176.8(5) . . . . ?
O3A C15A C16A C17A 4.3(6) . . . . ?
O4B C15B C16B C17B 177.8(5) . . . . ?
O3B C15B C16B C17B -1.6(6) . . . . ?
O4B C15B C16B C21B -3.0(7) . . . . ?
O3B C15B C16B C21B 177.7(4) . . . . ?
C21A C16A C17A C18A 1.4(6) . . . . ?
C15A C16A C17A C18A -176.7(4) . . . . ?
C21B C16B C17B C18B 1.0(6) . . . . ?
C15B C16B C17B C18B -179.8(4) . . . . ?
C16A C17A C18A C19A 1.4(6) . . . . ?
C16B C17B C18B C19B -2.8(6) . . . . ?
C17A C18A C19A C20A -2.9(7) . . . . ?
C17A C18A C19A N1A 175.0(4) . . . . ?
C17B C18B C19B C20B 2.5(6) . . . . ?
C17B C18B C19B N1B -175.3(4) . . . . ?
C18A C19A C20A C21A 1.5(7) . . . . ?
N1A C19A C20A C21A -176.5(4) . . . . ?
C18B C19B C20B C21B -0.4(7) . . . . ?
N1B C19B C20B C21B 177.4(4) . . . . ?
C17A C16A C21A C20A -2.9(7) . . . . ?
C15A C16A C21A C20A 175.4(4) . . . . ?
C19A C20A C21A C16A 1.4(7) . . . . ?
C19B C20B C21B C16B -1.4(6) . . . . ?
C17B C16B C21B C20B 1.1(7) . . . . ?
C15B C16B C21B C20B -178.1(4) . . . . ?
O8A C22A C23A C24A -22.3(6) . . . . ?
O7A C22A C23A C24A 157.0(4) . . . . ?
O8A C22A C23A C28A 158.1(4) . . . . ?
O7A C22A C23A C28A -22.7(5) . . . . ?
O8B C22B C23B C24B -152.5(4) . . . . ?
O7B C22B C23B C24B 27.3(5) . . . . ?
O8B C22B C23B C28B 26.5(6) . . . . ?
O7B C22B C23B C28B -153.8(4) . . . . ?
C28A C23A C24A C25A 2.6(6) . . . . ?
C22A C23A C24A C25A -177.0(4) . . . . ?
C28B C23B C24B C25B 2.4(6) . . . . ?
C22B C23B C24B C25B -178.7(4) . . . . ?
C23A C24A C25A C26A -1.1(6) . . . . ?
C23B C24B C25B C26B 0.1(6) . . . . ?
C24A C25A C26A C27A -2.0(6) . . . . ?
C24A C25A C26A N2A 177.0(3) . . . . ?
C24B C25B C26B C27B -2.1(6) . . . . ?
C24B C25B C26B N2B 176.2(4) . . . . ?
C25A C26A C27A C28A 3.6(6) . . . . ?
N2A C26A C27A C28A -175.5(4) . . . . ?
C25B C26B C27B C28B 1.6(6) . . . . ?
N2B C26B C27B C28B -176.6(3) . . . . ?
C26A C27A C28A C23A -2.0(6) . . . . ?
C24A C23A C28A C27A -1.0(6) . . . . ?
C22A C23A C28A C27A 178.6(4) . . . . ?
C26B C27B C28B C23B 0.9(6) . . . . ?
C24B C23B C28B C27B -2.9(6) . . . . ?
C22B C23B C28B C27B 178.1(4) . . . . ?
C20A C19A N1A O5A -171.4(4) . . . . ?
C18A C19A N1A O5A 10.5(6) . . . . ?
C20A C19A N1A O6A 10.2(6) . . . . ?
C18A C19A N1A O6A -167.9(4) . . . . ?
C18B C19B N1B O6B 168.3(4) . . . . ?
C20B C19B N1B O6B -9.5(6) . . . . ?
C18B C19B N1B O5B -10.4(6) . . . . ?
C20B C19B N1B O5B 171.7(4) . . . . ?
C25A C26A N2A O10A -12.2(6) . . . . ?
C27A C26A N2A O10A 166.9(4) . . . . ?
C25A C26A N2A O9A 169.1(4) . . . . ?
C27A C26A N2A O9A -11.8(6) . . . . ?
C27B C26B N2B O10B -174.2(4) . . . . ?
C25B C26B N2B O10B 7.4(5) . . . . ?
C27B C26B N2B O9B 6.9(5) . . . . ?
C25B C26B N2B O9B -171.4(4) . . . . ?
O2A C4A O1A C13A 3.5(5) . . . . ?
C5A C4A O1A C13A -120.0(4) . . . . ?
C3A C4A O1A C13A 119.0(4) . . . . ?
C14A C13A O1A C4A -23.5(5) . . . . ?
O2B C4B O1B C13B 32.9(5) . . . . ?
C5B C4B O1B C13B 148.4(4) . . . . ?
C3B C4B O1B C13B -85.4(4) . . . . ?
C14B C13B O1B C4B -26.6(5) . . . . ?
O1A C4A O2A C14A 19.3(5) . . . . ?
C5A C4A O2A C14A 141.0(4) . . . . ?
C3A C4A O2A C14A -97.5(4) . . . . ?
C13A C14A O2A C4A -33.3(4) . . . . ?
C13B C14B O2B C4B 9.9(6) . . . . ?
O1B C4B O2B C14B -26.4(5) . . . . ?
C5B C4B O2B C14B -145.3(4) . . . . ?
C3B C4B O2B C14B 93.9(5) . . . . ?
O4A C15A O3A C12A -6.2(6) . . . . ?
C16A C15A O3A C12A 172.7(3) . . . . ?
C11A C12A O3A C15A 77.7(5) . . . . ?
C1A C12A O3A C15A -163.7(4) . . . . ?
O4B C15B O3B C12B -0.6(6) . . . . ?
C16B C15B O3B C12B 178.7(3) . . . . ?
C11B C12B O3B C15B 70.4(5) . . . . ?
C1B C12B O3B C15B -171.5(3) . . . . ?
O8A C22A O7A C8A -2.5(6) . . . . ?
C23A C22A O7A C8A 178.3(3) . . . . ?
C7A C8A O7A C22A -165.0(3) . . . . ?
C9A C8A O7A C22A 77.9(4) . . . . ?
O8B C22B O7B C8B 3.0(6) . . . . ?
C23B C22B O7B C8B -176.8(3) . . . . ?
C7B C8B O7B C22B -72.8(4) . . . . ?
C9B C8B O7B C22B 169.0(3) . . . . ?
 
_refine_diff_density_max    0.711
_refine_diff_density_min   -0.271
_refine_diff_density_rms    0.056

_shelx_res_file
;
TITL TP467_cu_b.res in P1
    shelx.res
    created by SHELXL-2016/6 at 14:53:18 on 24-Jan-2017
CELL  1.54178   7.3394  12.4108  14.7998  107.312  100.068   91.140
ZERR     2.00   0.0005   0.0008   0.0013    0.005    0.005    0.005
LATT  -1
SFAC  C    H    N    O
UNIT  56 56 4 20
MERG   2
FMAP   2
PLAN    3
SIZE     0.030   0.100   0.240
ACTA
BOND   $H
CONF
L.S.  30
TEMP  -173.15
WGHT    0.072900    0.809900
FVAR       0.71682
C1A   1    0.425809    0.671291    0.188817    11.00000    0.03809    0.02609 =
         0.01809    0.00273    0.00840    0.00446
C1B   1    0.685124    0.270974    0.833249    11.00000    0.01940    0.01989 =
         0.01346    0.00000    0.00420   -0.00017
C2A   1    0.576622    0.619760    0.135379    11.00000    0.02656    0.03596 =
         0.02438    0.00037    0.00283    0.01238
AFIX  23
H6A1  2    0.520310    0.577107    0.067928    11.00000   -1.20000
H6A2  2    0.638813    0.565959    0.166039    11.00000   -1.20000
AFIX   0
C2B   1    0.720950    0.250874    0.932442    11.00000    0.03348    0.03035 =
         0.01677    0.00675    0.00157    0.00381
AFIX  23
H6B1  2    0.850882    0.231744    0.947088    11.00000   -1.20000
H6B2  2    0.704952    0.321606    0.982460    11.00000   -1.20000
AFIX   0
C3A   1    0.723067    0.713019    0.136151    11.00000    0.02636    0.03055 =
         0.03235    0.00978    0.01342    0.00593
AFIX  23
H5A1  2    0.817003    0.677042    0.098723    11.00000   -1.20000
H5A2  2    0.787412    0.750626    0.203323    11.00000   -1.20000
AFIX   0
C3B   1    0.591159    0.156250    0.936583    11.00000    0.03289    0.02694 =
         0.01618    0.01033    0.01051    0.00605
AFIX  23
H5B1  2    0.616835    0.148205    1.002098    11.00000   -1.20000
H5B2  2    0.614281    0.083987    0.890551    11.00000   -1.20000
AFIX   0
C4A   1    0.633311    0.803998    0.092493    11.00000    0.02264    0.02961 =
         0.01675   -0.00161    0.00688   -0.01070
C4B   1    0.387635    0.180405    0.911752    11.00000    0.03545    0.01715 =
         0.01692    0.00026    0.01304   -0.00496
C5A   1    0.484986    0.854018    0.144128    11.00000    0.04108    0.02507 =
         0.02568    0.00767    0.01262    0.00414
AFIX  23
H3A1  2    0.417244    0.901638    0.108494    11.00000   -1.20000
H3A2  2    0.544642    0.904822    0.208380    11.00000   -1.20000
AFIX   0
C5B   1    0.343561    0.197039    0.813975    11.00000    0.01770    0.02336 =
         0.01494    0.00039    0.00534   -0.00441
AFIX  23
H3B1  2    0.216318    0.222062    0.804409    11.00000   -1.20000
H3B2  2    0.344714    0.123221    0.764403    11.00000   -1.20000
AFIX   0
C6A   1    0.338785    0.769746    0.159008    11.00000    0.02147    0.04304 =
         0.01558    0.00225    0.00593    0.00966
C6B   1    0.478483    0.283940    0.797870    11.00000    0.02736    0.01630 =
         0.01410    0.00413    0.00519    0.00401
C7A   1    0.259881    0.833300    0.247358    11.00000    0.02212    0.01832 =
         0.01732    0.00551    0.01084    0.00169
AFIX  23
H12A  2    0.239770    0.912172    0.248086    11.00000   -1.20000
H12B  2    0.140454    0.795204    0.247897    11.00000   -1.20000
AFIX   0
C7B   1    0.469750    0.260703    0.689917    11.00000    0.02574    0.02582 =
         0.01252    0.00614    0.00872    0.00443
AFIX  23
H12C  2    0.340252    0.241886    0.654111    11.00000   -1.20000
H12D  2    0.522616    0.326994    0.676383    11.00000   -1.20000
AFIX   0
C8A   1    0.405237    0.830915    0.332793    11.00000    0.01543    0.01900 =
         0.01398    0.00289    0.00585   -0.00281
AFIX  13
H11A  2    0.500604    0.895864    0.349270    11.00000   -1.20000
AFIX   0
C8B   1    0.586020    0.160138    0.662851    11.00000    0.02165    0.01735 =
         0.01198    0.00186    0.00873   -0.00139
AFIX  13
H11B  2    0.506332    0.088351    0.647553    11.00000   -1.20000
AFIX   0
C9A   1    0.496235    0.717762    0.300191    11.00000    0.02398    0.02658 =
         0.01783    0.00944    0.00636    0.01091
AFIX  23
H10C  2    0.457629    0.664016    0.332340    11.00000   -1.20000
H10D  2    0.633244    0.730447    0.315640    11.00000   -1.20000
AFIX   0
C9B   1    0.739261    0.171069    0.752342    11.00000    0.01786    0.02496 =
         0.01809    0.00800    0.00418    0.00613
AFIX  23
H10A  2    0.863035    0.188254    0.739791    11.00000   -1.20000
H10B  2    0.740855    0.100359    0.770370    11.00000   -1.20000
AFIX   0
C10A  1    0.196834    0.719523    0.067336    11.00000    0.04879    0.04766 =
         0.02125    0.01287    0.00330    0.02155
AFIX  23
H9A1  2    0.247237    0.723609    0.010511    11.00000   -1.20000
H9A2  2    0.082568    0.760522    0.069696    11.00000   -1.20000
AFIX   0
C10B  1    0.450615    0.405839    0.851857    11.00000    0.03187    0.02643 =
         0.01977   -0.00131    0.00614    0.00988
AFIX  23
H9B1  2    0.430393    0.412392    0.917631    11.00000   -1.20000
H9B2  2    0.342539    0.433203    0.817174    11.00000   -1.20000
AFIX   0
C11A  1    0.154874    0.592713    0.062109    11.00000    0.03918    0.04124 =
         0.02682    0.00743    0.00039   -0.00596
AFIX  23
H8A1  2    0.020236    0.575743    0.056444    11.00000   -1.20000
H8A2  2    0.196471    0.540626    0.005881    11.00000   -1.20000
AFIX   0
C11B  1    0.630849    0.473815    0.855863    11.00000    0.04387    0.01526 =
         0.03473    0.00145    0.02316    0.00074
AFIX  23
H8B1  2    0.617017    0.507199    0.802272    11.00000   -1.20000
H8B2  2    0.663345    0.535589    0.917651    11.00000   -1.20000
AFIX   0
C12A  1    0.260166    0.580376    0.153608    11.00000    0.03277    0.03112 =
         0.01981   -0.00262    0.00713   -0.01211
AFIX  13
H7A   2    0.308136    0.503461    0.140667    11.00000   -1.20000
AFIX   0
C12B  1    0.780534    0.388970    0.846710    11.00000    0.02835    0.02558 =
         0.01174    0.00062    0.01302   -0.00809
AFIX  13
H7B   2    0.878360    0.411435    0.906534    11.00000   -1.20000
AFIX   0
C13A  1    0.785269    0.892062    0.005461    11.00000    0.04320    0.02047 =
         0.02202    0.00613    0.01672    0.00404
AFIX  23
H13A  2    0.915472    0.906706    0.000167    11.00000   -1.20000
H13B  2    0.709785    0.950515   -0.012233    11.00000   -1.20000
AFIX   0
C13B  1    0.284426    0.225448    1.055717    11.00000    0.03224    0.02964 =
         0.01554    0.00789    0.00913    0.00172
AFIX  23
H13C  2    0.183179    0.266160    1.083965    11.00000   -1.20000
H13D  2    0.391685    0.230190    1.108006    11.00000   -1.20000
AFIX   0
C14A  1    0.708792    0.775397   -0.056277    11.00000    0.03054    0.02754 =
         0.01776    0.00766    0.01350    0.00248
AFIX  23
H14A  2    0.654473    0.774631   -0.122605    11.00000   -1.20000
H14B  2    0.805939    0.720921   -0.059011    11.00000   -1.20000
AFIX   0
C14B  1    0.219958    0.103450    0.999649    11.00000    0.06465    0.02834 =
         0.02921    0.01273    0.03344    0.00055
AFIX  23
H14C  2    0.281539    0.051842    1.033016    11.00000   -1.20000
H14D  2    0.083971    0.090813    0.992847    11.00000   -1.20000
AFIX   0
C15A  1    0.028617    0.509923    0.220438    11.00000    0.01685    0.02227 =
         0.02332    0.00180    0.00714   -0.00038
C15B  1    0.972564    0.478107    0.771865    11.00000    0.01951    0.01957 =
         0.02712    0.00753    0.00284   -0.00509
C16A  1   -0.063710    0.526568    0.305581    11.00000    0.01357    0.01932 =
         0.02728    0.00796    0.00524    0.00300
C16B  1    1.056809    0.467061    0.684586    11.00000    0.01625    0.02057 =
         0.02138    0.00600    0.00479   -0.00021
C17A  1   -0.035862    0.626788    0.381462    11.00000    0.01440    0.01920 =
         0.02994    0.00777    0.00241   -0.00284
AFIX  43
H17A  2    0.038661    0.688951    0.379010    11.00000   -1.20000
AFIX   0
C17B  1    1.026859    0.369330    0.606104    11.00000    0.02009    0.02121 =
         0.02115    0.00913    0.00826    0.00070
AFIX  43
H17B  2    0.950549    0.306754    0.606410    11.00000   -1.20000
AFIX   0
C18A  1   -0.117433    0.635590    0.460796    11.00000    0.01885    0.02056 =
         0.02829    0.00383    0.00805   -0.00178
AFIX  43
H18A  2   -0.102022    0.704116    0.512656    11.00000   -1.20000
AFIX   0
C18B  1    1.109132    0.363465    0.526999    11.00000    0.02053    0.02832 =
         0.01939    0.00492    0.00458    0.00415
AFIX  43
H18B  2    1.094290    0.296032    0.474053    11.00000   -1.20000
AFIX   0
C19A  1   -0.221479    0.542858    0.462978    11.00000    0.01482    0.03322 =
         0.02870    0.01142    0.00901    0.00794
C19B  1    1.211567    0.456531    0.527009    11.00000    0.01551    0.02844 =
         0.02461    0.01698    0.00560    0.00372
C20A  1   -0.254798    0.443540    0.388158    11.00000    0.02005    0.02167 =
         0.03588    0.01258    0.00881    0.00024
AFIX  43
H20A  2   -0.329428    0.381685    0.391080    11.00000   -1.20000
AFIX   0
C20B  1    1.243594    0.555956    0.604097    11.00000    0.02097    0.02411 =
         0.03822    0.01356    0.01018    0.00114
AFIX  43
H20B  2    1.316150    0.619122    0.602023    11.00000   -1.20000
AFIX   0
C21A  1   -0.175788    0.436512    0.308082    11.00000    0.02081    0.01934 =
         0.03346    0.00467    0.00947    0.00141
AFIX  43
H21A  2   -0.198656    0.369515    0.254590    11.00000   -1.20000
AFIX   0
C21B  1    1.166467    0.560047    0.683971    11.00000    0.02167    0.02236 =
         0.03101    0.00955    0.00830   -0.00300
AFIX  43
H21B  2    1.188168    0.626116    0.738340    11.00000   -1.20000
AFIX   0
C22A  1    0.428393    0.864252    0.501180    11.00000    0.02382    0.01158 =
         0.01544    0.00037    0.00146   -0.00250
C22B  1    0.565514    0.128715    0.495610    11.00000    0.01783    0.01434 =
         0.01292    0.00140    0.00726   -0.00329
C23A  1    0.323167    0.873710    0.579902    11.00000    0.02065    0.01062 =
         0.01737   -0.00158    0.00598   -0.00138
C23B  1    0.675360    0.121928    0.417397    11.00000    0.01765    0.01249 =
         0.01192    0.00006    0.00509   -0.00618
C24A  1    0.414076    0.858611    0.664612    11.00000    0.01927    0.01663 =
         0.02033    0.00430    0.00487   -0.00181
AFIX  43
H24A  2    0.542383    0.846137    0.672614    11.00000   -1.20000
AFIX   0
C24B  1    0.860586    0.096193    0.428783    11.00000    0.02277    0.01786 =
         0.01499    0.00307    0.00529    0.00200
AFIX  43
H23B  2    0.918726    0.081065    0.485862    11.00000   -1.20000
AFIX   0
C25A  1    0.316998    0.861682    0.738919    11.00000    0.02595    0.02103 =
         0.01345    0.00543    0.00991    0.00525
AFIX  43
H25A  2    0.376942    0.850096    0.797225    11.00000   -1.20000
AFIX   0
C25B  1    0.959086    0.092833    0.356471    11.00000    0.01588    0.02026 =
         0.01992    0.00255    0.00579    0.00002
AFIX  43
H24B  2    1.085212    0.075352    0.363016    11.00000   -1.20000
AFIX   0
C26A  1    0.132055    0.882028    0.724621    11.00000    0.02438    0.01232 =
         0.01521    0.00046    0.00730   -0.00310
C26B  1    0.869483    0.115591    0.274039    11.00000    0.02137    0.01002 =
         0.01526    0.00124    0.00988   -0.00205
C27A  1    0.039598    0.902757    0.642701    11.00000    0.01988    0.01936 =
         0.01674    0.00092    0.00758   -0.00004
AFIX  43
H27A  2   -0.086324    0.920645    0.636691    11.00000   -1.20000
AFIX   0
C27B  1    0.683702    0.137795    0.260996    11.00000    0.02294    0.01790 =
         0.01685    0.00616    0.00000   -0.00207
AFIX  43
H26B  2    0.625135    0.151158    0.203205    11.00000   -1.20000
AFIX   0
C28A  1    0.137367    0.896493    0.569552    11.00000    0.02322    0.02129 =
         0.01492    0.00534    0.00277   -0.00127
AFIX  43
H28A  2    0.076473    0.907951    0.511361    11.00000   -1.20000
AFIX   0
C28B  1    0.585899    0.140263    0.331917    11.00000    0.01969    0.01764 =
         0.01534    0.00045    0.00582   -0.00133
AFIX  43
H27B  2    0.458222    0.154286    0.323486    11.00000   -1.20000
AFIX   0
N1A   3   -0.294874    0.550353    0.551644    11.00000    0.01583    0.03899 =
         0.03854    0.02096    0.00977    0.00874
N1B   3    1.286075    0.453241    0.440399    11.00000    0.01870    0.04055 =
         0.02627    0.01787    0.00700    0.00695
N2A   3    0.027418    0.879596    0.800921    11.00000    0.02661    0.01447 =
         0.01998    0.00302    0.01303   -0.00102
N2B   3    0.976626    0.119232    0.199997    11.00000    0.02435    0.01762 =
         0.01543    0.00407    0.00561   -0.00324
O1A   4    0.772975    0.889463    0.100102    11.00000    0.04760    0.03534 =
         0.02025   -0.00242    0.01821   -0.02292
O1B   4    0.336713    0.271317    0.983882    11.00000    0.03440    0.02258 =
         0.01942    0.00342    0.01519   -0.00011
O2A   4    0.569120    0.750071   -0.007666    11.00000    0.04433    0.03359 =
         0.01867   -0.00208    0.01512   -0.01003
O2B   4    0.268812    0.084084    0.908830    11.00000    0.06811    0.03128 =
         0.02310   -0.00657    0.02959   -0.02734
O3A   4    0.146313    0.597261    0.229884    11.00000    0.01957    0.02019 =
         0.01950    0.00357    0.00545   -0.00630
O3B   4    0.864341    0.384871    0.762747    11.00000    0.02477    0.02350 =
         0.01702    0.00322    0.01030   -0.00598
O4A   4   -0.000303    0.424887    0.151737    11.00000    0.03411    0.02522 =
         0.03400   -0.00575    0.01530   -0.00875
O4B   4    1.000870    0.560412    0.841520    11.00000    0.03625    0.02773 =
         0.02648   -0.00017    0.01119   -0.01276
O5A   4   -0.283819    0.642757    0.613091    11.00000    0.03882    0.04479 =
         0.03074    0.00794    0.01778    0.00596
O5B   4    1.276197    0.361253    0.376874    11.00000    0.03564    0.05160 =
         0.03373    0.01199    0.01703    0.00468
O6A   4   -0.359538    0.462385    0.559878    11.00000    0.02280    0.04875 =
         0.04366    0.03146    0.01383    0.00646
O6B   4    1.351732    0.542041    0.434137    11.00000    0.02013    0.05058 =
         0.04773    0.03607    0.00875    0.00799
O7A   4    0.315514    0.838872    0.414900    11.00000    0.01899    0.02001 =
         0.01477    0.00108    0.00947   -0.00350
O7B   4    0.676096    0.157026    0.581703    11.00000    0.01854    0.02030 =
         0.01059    0.00129    0.00563   -0.00463
O8A   4    0.595881    0.876805    0.513835    11.00000    0.01934    0.03281 =
         0.02155    0.00577    0.00928   -0.00275
O8B   4    0.398789    0.110162    0.480670    11.00000    0.01876    0.02929 =
         0.01585    0.00303    0.00451   -0.00514
O9A   4   -0.128317    0.914180    0.796096    11.00000    0.02454    0.03562 =
         0.02758    0.01005    0.01678    0.00628
O9B   4    0.900261    0.152849    0.133528    11.00000    0.03377    0.02904 =
         0.02174    0.01255    0.01252    0.00312
O10A  4    0.101206    0.840960    0.864242    11.00000    0.03973    0.03460 =
         0.02511    0.01754    0.01548    0.00950
O10B  4    1.136241    0.090635    0.208576    11.00000    0.02200    0.03314 =
         0.02746    0.00978    0.01199    0.00446
HKLF    4


REM  TP467_cu_b.res in P1
REM R1 =  0.0466 for    8234 Fo > 4sig(Fo)  and  0.0510 for all    8895 data
REM    721 parameters refined using      3 restraints

END

WGHT      0.0729      0.8099

REM Highest difference peak  0.711,  deepest hole -0.271,  1-sigma level  0.056
Q1    1   0.6782  0.7242  0.0171  11.00000  0.05    0.71
Q2    1   0.6546  0.7946  0.1842  11.00000  0.05    0.63
Q3    1   0.4071  0.8460  0.0618  11.00000  0.05    0.63
;
_shelx_res_checksum   81240

_shelx_hkl_file
;
  -1   0   0   93.69    3.00
  -1   0   0   94.79    3.00
  -1   0   0   95.99    3.10
  -1   0   0   95.49    3.10
  -1   0   0   90.59    3.20
  -1   0   0   90.79    3.00
   1   0   0   92.79    3.00
   1   0   0   95.39    3.00
   1   0   0   94.19    3.20
   1   0   0   86.99    3.00
  -2   0   0  504.35   16.10
  -2   0   0  524.75   16.40
  -2   0   0  547.05   16.20
  -2   0   0  486.35   16.00
   2   0   0  511.15   16.20
   2   0   0  505.15   16.10
   2   0   0  518.15   16.40
   2   0   0  514.95   16.10
  -3   0   0  858.21   27.70
  -3   0   0  886.81   27.40
  -3   0   0  819.22   27.20
  -3   0   0  891.71   27.20
   3   0   0  872.81   27.20
   3   0   0  868.81   27.10
   3   0   0  887.21   27.40
  -4   0   0   50.09    3.00
  -4   0   0   49.00    2.40
  -4   0   0   52.29    2.30
  -4   0   0   46.90    2.50
   4   0   0   41.40    4.40
   4   0   0   48.70    3.00
  -5   0   0   15.10    2.30
  -5   0   0   10.40    2.90
  -5   0   0   12.00    2.40
   5   0   0   10.00    2.50
   5   0   0   14.60    2.50
   5   0   0   13.10    2.70
   5   0   0   10.60    2.30
  -6   0   0    5.00    1.50
  -6   0   0    3.30    2.30
   6   0   0    1.10    2.10
   6   0   0    9.90    2.90
   6   0   0    5.20    3.20
   6   0   0    4.80    2.60
  -7   0   0  217.48    8.10
  -7   0   0  199.68   11.30
  -7   0   0  205.68    8.00
   7   0   0  219.58    8.80
   7   0   0  221.68    9.70
   7   0   0  206.38   11.60
  -8   0   0    6.70    3.10
  -8   0   0    1.20    2.60
   8   0   0    2.30    1.30
   8   0   0    5.20    2.10
   8  -1   0   18.30    2.40
   8  -1   0   19.80    3.00
  -8   1   0   15.10    2.40
  -8   1   0   18.60    2.60
   7  -1   0    5.00    2.20
   7  -1   0   -0.30    2.70
   7  -1   0   -1.90    3.10
  -7   1   0    2.00    2.00
  -7   1   0    0.40    5.70
  -7   1   0    0.80    2.10
   6  -1   0   18.60    5.80
   6  -1   0   16.20    3.60
   6  -1   0   13.60    6.90
   6  -1   0   15.30    3.40
   6  -1   0    9.90    2.50
   6  -1   0   16.00    2.50
  -6   1   0   19.30    3.10
  -6   1   0   12.80    1.90
   5  -1   0   14.20    4.70
   5  -1   0    8.30    2.80
   5  -1   0   11.00    2.90
   5  -1   0   11.80    2.40
   5  -1   0   12.80    2.80
  -5   1   0    7.10    1.90
  -5   1   0   10.90    1.60
  -5   1   0   10.10    2.80
  -5   1   0   11.10    2.70
   4  -1   0  599.84   19.00
   4  -1   0  553.84   18.70
   4  -1   0  627.34   20.70
  -4   1   0  573.54   19.20
  -4   1   0  567.44   18.50
  -4   1   0  610.04   18.60
  -4   1   0  532.55   18.70
  -4   1   0  584.94   18.80
   3  -1   0  341.77   11.30
   3  -1   0  354.36   11.40
   3  -1   0  348.07   11.10
  -3   1   0  353.86   11.60
  -3   1   0  329.27   11.10
  -3   1   0  351.36   11.40
  -3   1   0  348.97   11.20
   2  -1   0   48.00    2.00
   2  -1   0   48.20    1.90
   2  -1   0   47.10    1.80
   2  -1   0   46.60    1.80
   2  -1   0   45.50    2.20
  -2   1   0   50.59    2.00
  -2   1   0   45.40    2.00
  -2   1   0   44.90    2.10
  -2   1   0   40.30    1.90
  -2   1   0   48.90    1.80
  -2   1   0   46.30    1.90
   1  -1   0 1735.23   53.89
   0  -1   0   83.49    2.60
   0  -1   0   80.39    2.60
   0  -1   0   83.09    2.60
   0  -1   0   81.59    2.60
   0  -1   0   78.99    2.70
   0   1   0   85.19    2.60
   0   1   0   77.09    2.60
   0   1   0   77.89    2.60
   0   1   0   77.29    2.70
   0   1   0   78.79    2.60
   0   1   0   78.39    2.60
  -1  -1   0   24.10    1.00
  -1  -1   0   27.30    1.00
  -1  -1   0   26.40    1.00
  -1  -1   0   27.20    1.00
  -1  -1   0   26.90    1.30
  -1  -1   0   26.00    1.00
   1   1   0   27.10    1.00
   1   1   0   28.00    1.20
   1   1   0   26.10    1.10
   1   1   0   27.30    1.00
  -2  -1   0  321.17   10.50
  -2  -1   0  320.97   10.30
  -2  -1   0  339.17   10.50
  -2  -1   0  336.17   10.40
  -2  -1   0  328.17   10.80
   2   1   0  333.07   10.50
   2   1   0  334.77   10.40
  -3  -1   0   63.89    2.60
  -3  -1   0   72.99    2.50
  -3  -1   0   71.39    2.70
  -3  -1   0   72.79    3.10
   3   1   0   61.59    2.40
   3   1   0   68.49    2.80
  -4  -1   0  229.78    8.50
  -4  -1   0  238.38    7.40
  -4  -1   0  227.78    7.50
  -4  -1   0  223.28    7.90
   4   1   0  218.88    7.20
   4   1   0  216.38    9.10
   4   1   0  217.88    8.70
   4   1   0  230.28    8.00
   4   1   0  220.08    7.20
  -5  -1   0  159.78    5.80
  -5  -1   0  154.38    7.40
   5   1   0  149.09    7.00
   5   1   0  150.28    7.50
   5   1   0  150.68    7.90
   5   1   0  149.88    7.10
  -6  -1   0   72.59    3.90
  -6  -1   0   72.79    4.50
   6   1   0   65.69    5.20
   6   1   0   69.69    5.70
   6   1   0   66.19    6.10
   6   1   0   66.09    4.80
  -7  -1   0   44.90    3.60
  -7  -1   0   41.10    3.70
   7   1   0   45.60    3.90
   7   1   0   32.20    4.70
   7   1   0   40.50    5.40
  -8  -1   0    5.20    2.50
  -8  -1   0    7.60    2.70
   8   1   0    1.30    1.70
   8   1   0    4.40    1.40
   8  -2   0   35.60    2.50
   8  -2   0   39.80    4.00
  -8   2   0   31.10    3.60
  -8   2   0   34.90    3.40
   7  -2   0  108.59    5.80
   7  -2   0   96.09    5.70
   7  -2   0  105.69    6.40
  -7   2   0   97.59    4.80
  -7   2   0  112.69    7.20
  -7   2   0  103.19    5.10
   6  -2   0  130.99    7.30
   6  -2   0  118.39    6.50
   6  -2   0  121.19    7.80
   6  -2   0  121.79    5.80
   6  -2   0  107.39    9.00
  -6   2   0  120.19    5.50
  -6   2   0  128.09    5.30
   5  -2   0    9.70    3.40
   5  -2   0   12.00    5.30
   5  -2   0    5.90    2.90
   5  -2   0   12.80    2.60
   5  -2   0    8.10    3.10
  -5   2   0    8.50    2.20
  -5   2   0    8.60    1.50
  -5   2   0    7.50    1.70
   4  -2   0  495.55   18.50
   4  -2   0  519.45   17.50
   4  -2   0  572.04   19.10
  -4   2   0  545.55   17.50
  -4   2   0  510.05   17.10
  -4   2   0  531.85   17.10
  -4   2   0  518.45   17.60
  -4   2   0  533.75   17.90
  -4   2   0  541.95   17.20
   3  -2   0  613.14   19.00
   3  -2   0  583.54   19.00
   3  -2   0  580.84   18.70
   3  -2   0  590.24   18.80
  -3   2   0  565.04   18.70
  -3   2   0  577.24   18.80
  -3   2   0  619.84   18.80
  -3   2   0  567.64   19.10
  -3   2   0  603.64   19.00
  -3   2   0  606.24   19.30
   2  -2   0  390.46   12.50
   2  -2   0  398.76   12.60
   2  -2   0  385.26   12.40
   2  -2   0  406.86   12.50
  -2   2   0  391.36   12.40
  -2   2   0  359.06   12.40
  -2   2   0  387.96   12.70
  -2   2   0  383.16   12.60
  -2   2   0  394.76   12.60
   1  -2   0 1130.99   35.80
   1  -2   0 1154.48   35.70
   1  -2   0 1170.98   35.80
  -1   2   0 1160.98   35.80
  -1   2   0 1170.68   35.70
  -1   2   0 1121.49   35.80
  -1   2   0 1124.29   35.80
   0  -2   0   26.40    1.30
   0  -2   0   28.30    1.30
   0  -2   0   27.70    1.20
   0  -2   0   27.80    1.10
   0   2   0   27.40    1.20
   0   2   0   27.30    1.00
   0   2   0   26.70    1.20
   0   2   0   30.50    1.10
   0   2   0   28.50    1.20
  -1  -2   0 4750.62  150.68
   1   2   0 4699.13  150.38
  -2  -2   0  148.29    4.90
  -2  -2   0  146.99    4.90
  -2  -2   0  152.18    4.90
  -2  -2   0  145.99    4.80
   2   2   0  145.59    4.80
   2   2   0  149.39    5.20
  -3  -2   0  475.25   15.70
  -3  -2   0  509.75   15.70
  -3  -2   0  493.25   15.80
  -3  -2   0  507.85   16.50
   3   2   0  509.15   15.60
  -4  -2   0  863.01   27.70
  -4  -2   0  918.41   28.80
  -4  -2   0  889.11   27.70
   4   2   0  873.71   28.60
   4   2   0  869.11   28.70
   4   2   0  868.91   29.10
  -5  -2   0  627.74   19.50
  -5  -2   0  600.84   21.10
   5   2   0  611.54   20.50
   5   2   0  619.34   20.80
   5   2   0  571.04   20.50
  -6  -2   0   82.19    4.90
  -6  -2   0   86.29    4.40
   6   2   0   85.99    5.10
   6   2   0   90.09    6.30
   6   2   0   82.39    5.60
  -7  -2   0   40.00    3.60
  -7  -2   0   41.30    3.60
   7   2   0   40.90    5.20
   7   2   0   39.90    3.70
  -8  -2   0   55.79    4.10
   8   2   0   68.79    4.30
   8   2   0   59.19    3.00
   8  -3   0    2.50    1.10
   8  -3   0    2.30    2.40
  -8   3   0    1.80    1.50
  -8   3   0   -1.60    2.30
   7  -3   0   25.40    4.70
   7  -3   0   18.60    3.40
   7  -3   0   15.10    2.70
  -7   3   0   23.10    2.50
  -7   3   0   21.60    3.30
  -7   3   0   24.00    3.90
   6  -3   0   21.20    3.00
   6  -3   0   19.00    4.90
   6  -3   0   25.60    3.80
   6  -3   0   16.70    3.50
   6  -3   0   24.80    5.00
  -6   3   0   23.70    3.80
  -6   3   0   18.70    3.10
  -6   3   0   18.40    3.40
  -6   3   0   16.60    2.80
  -6   3   0   16.50    4.00
   5  -3   0    5.90    4.00
   5  -3   0    9.90    3.20
   5  -3   0    9.20    2.30
   5  -3   0    7.40    3.70
  -5   3   0   16.00    3.00
  -5   3   0    9.50    1.90
  -5   3   0    9.20    1.80
   4  -3   0  130.59    8.00
   4  -3   0  129.39    8.00
   4  -3   0  140.89    5.70
   4  -3   0  138.09    7.00
   4  -3   0  126.89    6.10
   4  -3   0  128.09    7.70
  -4   3   0  132.69    5.20
  -4   3   0  133.99    5.20
  -4   3   0  137.79    5.80
  -4   3   0  144.29    6.00
  -4   3   0  134.09    5.60
  -4   3   0  131.29    5.80
   3  -3   0 1961.70   60.19
   3  -3   0 2011.60   60.59
   3  -3   0 1876.71   60.29
   3  -3   0 1981.00   60.39
  -3   3   0 1914.91   60.49
  -3   3   0 1877.61   60.59
  -3   3   0 1846.92   60.09
  -3   3   0 2080.59   60.29
  -3   3   0 1802.12   60.09
   2  -3   0  138.29    4.80
   2  -3   0  143.39    5.00
   2  -3   0  138.79    5.20
   2  -3   0  139.99    4.90
  -2   3   0  137.59    5.10
  -2   3   0  133.29    4.80
  -2   3   0  145.59    5.20
  -2   3   0  138.29    5.10
  -2   3   0  142.59    4.90
   1  -3   0    4.70    0.70
   1  -3   0    5.10    0.90
   1  -3   0    7.30    1.10
   1  -3   0    5.40    0.90
   1  -3   0    6.00    1.00
  -1   3   0    6.70    0.90
  -1   3   0    5.90    0.80
  -1   3   0    5.30    0.90
  -1   3   0    6.00    0.80
  -1   3   0    5.60    1.00
   0   3   0 8816.72  279.87
  -1  -3   0 1154.88   33.20
  -1  -3   0 1113.39   33.30
  -1  -3   0 1058.59   33.40
  -1  -3   0  913.01   33.20
   1   3   0 1056.99   33.30
   1   3   0 1084.59   33.40
   1   3   0 1078.59   33.20
   1   3   0 1070.89   33.20
  -2  -3   0    3.00    0.70
  -2  -3   0    2.40    0.30
  -2  -3   0    2.90    0.60
  -2  -3   0    1.80    0.60
  -2  -3   0    4.00    0.80
  -2  -3   0    2.30    0.50
   2   3   0    1.80    0.40
   2   3   0    3.10    0.80
   2   3   0    2.10    0.30
  -3  -3   0  231.78    7.70
  -3  -3   0  228.98    7.60
  -3  -3   0  236.68    7.70
   3   3   0  231.68    8.20
   3   3   0  232.88    7.40
   3   3   0  226.98    7.40
  -4  -3   0  142.79    5.00
  -4  -3   0  141.39    6.20
   4   3   0  139.39    6.20
   4   3   0  135.69    6.60
   4   3   0  128.59    6.30
   4   3   0  137.89    6.90
   4   3   0  136.19    7.70
  -5  -3   0  284.57    9.70
  -5  -3   0  284.57   11.40
   5   3   0  286.57   10.70
   5   3   0  277.37   10.80
   5   3   0  283.87   13.20
   5   3   0  286.87   10.50
   5   3   0  277.77   11.30
  -6  -3   0   -0.60    2.00
  -6  -3   0   -1.60    1.90
   6   3   0    4.00    3.30
   6   3   0    0.00    2.50
   6   3   0    0.90    2.30
  -7  -3   0   40.70    3.80
  -7  -3   0   52.09    3.80
   7   3   0   50.29    4.10
  -8  -3   0   14.00    2.80
   8   3   0   13.00    1.70
   8   3   0   13.40    4.70
   8  -4   0   13.70    2.70
   8  -4   0   16.40    2.70
  -8   4   0   17.70    2.30
  -8   4   0   17.40    2.70
   7  -4   0  341.57   13.30
  -7   4   0  339.97   13.60
  -7   4   0  367.66   12.50
  -7   4   0  372.96   12.30
   6  -4   0    4.20    2.60
   6  -4   0    4.70    3.00
   6  -4   0    2.90    3.30
   6  -4   0    6.20    3.40
  -6   4   0    5.00    3.60
  -6   4   0    2.20    2.00
  -6   4   0    0.90    1.90
  -6   4   0    0.50    2.30
  -6   4   0    3.40    2.00
   5  -4   0   73.49    8.20
   5  -4   0   98.69    6.40
   5  -4   0  100.79    7.90
   5  -4   0   92.69    6.30
  -5   4   0  100.69    4.60
  -5   4   0   92.79    5.30
  -5   4   0   98.79    4.50
  -5   4   0   98.39    5.60
   4  -4   0  173.28    8.70
   4  -4   0  168.28    9.00
   4  -4   0  164.18    8.20
   4  -4   0  170.58    9.10
   4  -4   0  175.08    7.70
   4  -4   0  172.48    7.50
  -4   4   0  187.48    7.50
  -4   4   0  187.28    6.60
  -4   4   0  171.78    6.50
  -4   4   0  179.48    7.50
  -4   4   0  193.68    7.20
   3  -4   0  124.89    4.90
   3  -4   0  116.19    5.90
   3  -4   0  125.39    4.90
   3  -4   0  122.09    4.80
  -3   4   0  121.79    4.80
  -3   4   0  124.09    5.10
  -3   4   0  120.19    4.70
  -3   4   0  124.89    5.00
  -3   4   0  131.99    5.10
  -3   4   0  127.69    5.10
   2  -4   0   54.49    2.50
   2  -4   0   53.99    2.50
   2  -4   0   52.59    3.10
   2  -4   0   53.69    2.50
  -2   4   0   52.59    2.60
  -2   4   0   51.99    2.60
  -2   4   0   50.89    2.40
  -2   4   0   51.79    2.50
  -2   4   0   54.49    2.80
   1  -4   0  513.55   15.80
   1  -4   0  476.25   15.70
   1  -4   0  517.55   16.10
   1  -4   0  476.05   15.80
  -1   4   0  501.15   15.90
  -1   4   0  504.85   15.80
  -1   4   0  496.75   15.90
  -1   4   0  470.55   15.80
  -1   4   0  499.25   16.00
   0   4   0 5865.11  193.38
   0   4   0 5891.41  192.48
  -1  -4   0 2564.34   82.09
  -1  -4   0 2648.83   82.49
  -1  -4   0 2732.63   82.39
  -2  -4   0   40.10    1.80
  -2  -4   0   38.70    1.80
  -2  -4   0   42.50    2.10
  -2  -4   0   39.40    2.10
  -2  -4   0   41.70    1.60
   2   4   0   40.70    1.80
   2   4   0   41.90    2.20
  -3  -4   0  113.39    4.20
  -3  -4   0  112.09    4.10
  -3  -4   0  108.19    4.30
  -3  -4   0  111.29    4.10
   3   4   0  108.99    3.80
   3   4   0  109.19    5.50
   3   4   0  114.49    4.70
   3   4   0  109.99    4.90
   3   4   0  108.69    3.80
  -4  -4   0  236.38    9.50
  -4  -4   0  243.48    8.10
   4   4   0  238.18    9.00
   4   4   0  236.38    8.80
   4   4   0  239.08    9.20
   4   4   0  243.88    9.90
   4   4   0  226.98    9.80
  -5  -4   0   18.00    3.60
  -5  -4   0   24.30    2.80
   5   4   0   26.20    3.90
   5   4   0   26.30    3.70
   5   4   0   23.80    5.00
   5   4   0   19.50    3.20
   5   4   0   28.20    3.60
  -6  -4   0  144.59    6.10
   6   4   0  149.69    7.90
   6   4   0  161.08    6.90
   6   4   0  153.48    7.10
  -7  -4   0   74.69    4.50
  -7  -4   0   62.19    3.90
   7   4   0   79.99    4.10
   7   4   0   80.59    4.50
   7   4   0   69.09    4.80
   8   4   0   17.80    2.70
   8   4   0   26.50    2.30
   8   4   0   21.80    2.30
   8  -5   0   -0.10    1.60
   8  -5   0    2.80    4.00
  -8   5   0    3.80    2.90
  -8   5   0    0.20    2.70
   7  -5   0   25.00    3.60
   7  -5   0   24.70    3.40
   7  -5   0   26.00    4.20
   7  -5   0   15.70    3.40
  -7   5   0   13.50    4.00
  -7   5   0   19.90    2.90
  -7   5   0   29.60    4.30
  -7   5   0   19.30    3.20
   6  -5   0  136.69    6.40
   6  -5   0  139.49    7.90
   6  -5   0  126.29    7.50
   6  -5   0  135.29    8.10
  -6   5   0  129.29    7.80
  -6   5   0  148.89    6.10
  -6   5   0  129.29    7.10
  -6   5   0  131.69    7.00
   5  -5   0   37.00    5.30
   5  -5   0   40.40    6.60
   5  -5   0   33.80    5.20
   5  -5   0   33.80    5.90
   5  -5   0   41.70    5.80
  -5   5   0   34.50    3.90
  -5   5   0   32.00    4.10
  -5   5   0   33.70    3.30
   4  -5   0    4.70    2.30
   4  -5   0    4.40    3.50
   4  -5   0    7.50    3.30
   4  -5   0    1.00    2.40
   4  -5   0    2.90    3.50
   4  -5   0    3.30    4.20
  -4   5   0    2.80    1.60
  -4   5   0    2.20    1.50
  -4   5   0    3.20    1.40
  -4   5   0    2.30    1.60
   3  -5   0  141.19    8.50
   3  -5   0  154.78    7.40
   3  -5   0  150.28    7.80
   3  -5   0  160.38    6.40
  -3   5   0  157.28    6.80
  -3   5   0  168.08    6.40
  -3   5   0  165.98    5.90
  -3   5   0  174.18    6.30
  -3   5   0  161.88    6.60
  -3   5   0  165.38    5.90
   2  -5   0  475.85   15.00
   2  -5   0  462.65   15.50
   2  -5   0  446.46   14.90
   2  -5   0  468.15   14.90
   2  -5   0  467.95   15.20
  -2   5   0  466.45   15.10
  -2   5   0  418.36   14.90
  -2   5   0  439.26   14.80
  -2   5   0  470.45   15.00
  -2   5   0  471.65   15.10
  -2   5   0  437.66   15.50
   1  -5   0  431.06   14.10
   1  -5   0  434.06   13.70
   1  -5   0  413.56   13.70
   1  -5   0  422.26   14.10
  -1   5   0  432.96   13.80
  -1   5   0  425.16   13.70
  -1   5   0  416.26   13.80
  -1   5   0  405.16   13.60
  -1   5   0  419.76   13.90
   0  -5   0  988.70   31.50
   0  -5   0 1019.50   31.20
   0  -5   0 1036.10   31.60
   0   5   0  959.70   31.20
   0   5   0 1009.80   31.30
   0   5   0  969.00   31.30
   0   5   0  955.80   31.20
  -1  -5   0  616.24   19.90
  -1  -5   0  607.84   20.00
  -1  -5   0  633.94   20.10
  -1  -5   0  634.54   19.60
   1   5   0  609.64   19.80
   1   5   0  615.64   19.70
   1   5   0  603.94   19.60
  -2  -5   0    8.00    1.50
  -2  -5   0    8.80    1.40
  -2  -5   0    9.60    0.90
  -2  -5   0   11.80    2.00
  -2  -5   0    7.10    1.20
  -2  -5   0    8.40    1.30
   2   5   0    7.90    1.00
   2   5   0    8.60    1.40
   2   5   0    7.70    1.10
  -3  -5   0  127.59    5.20
  -3  -5   0  130.69    4.80
  -3  -5   0  131.99    4.90
  -3  -5   0  135.09    5.30
   3   5   0  129.79    5.40
   3   5   0  118.19    7.90
   3   5   0  127.09    5.70
   3   5   0  122.29    5.70
   3   5   0  125.39    5.80
   3   5   0  136.99    6.60
  -4  -5   0   40.50    2.90
  -4  -5   0   35.40    3.10
  -4  -5   0   39.70    4.30
   4   5   0   48.00    5.40
   4   5   0   37.60    4.90
   4   5   0   31.00    4.70
   4   5   0   36.90    3.40
  -5  -5   0   29.50    3.30
  -5  -5   0   36.90    3.10
   5   5   0   36.60    3.70
   5   5   0   28.60    5.30
   5   5   0   41.20    4.00
   5   5   0   38.80    5.10
  -6  -5   0   92.99    4.70
  -6  -5   0   89.09    4.30
   6   5   0   88.49    5.20
   6   5   0   93.49    7.50
   6   5   0   90.49    5.20
   6   5   0   92.29    5.10
  -7  -5   0    3.20    2.60
   7   5   0    1.80    1.80
   7   5   0    2.10    1.10
   7   5   0    2.70    1.70
   8  -6   0    2.80    2.10
  -8   6   0    1.50    1.50
   7  -6   0   -0.80    4.20
   7  -6   0    0.50    2.00
   7  -6   0    3.00    2.00
   7  -6   0   -1.30    1.80
   7  -6   0    2.90    3.00
  -7   6   0    0.90    2.60
  -7   6   0    0.80    1.50
  -7   6   0    1.40    3.00
  -7   6   0    0.90    4.10
   6  -6   0  106.69    6.80
   6  -6   0  110.89    6.50
   6  -6   0  120.99    6.00
   6  -6   0  103.79    7.40
  -6   6   0  114.49    7.50
  -6   6   0  122.09    6.40
  -6   6   0  116.39    6.50
  -6   6   0  116.59    5.50
  -6   6   0  116.19    5.10
   5  -6   0    3.90    3.90
   5  -6   0    7.50    3.60
   5  -6   0    9.50    2.80
   5  -6   0    8.90    3.40
  -5   6   0    7.00    2.30
  -5   6   0   11.90    2.10
  -5   6   0   11.50    2.10
   4  -6   0   60.49    7.50
   4  -6   0   65.89    5.00
  -4   6   0   67.99    4.00
  -4   6   0   61.79    3.60
  -4   6   0   63.69    3.80
  -4   6   0   64.69    4.20
   3  -6   0  879.11   30.50
   3  -6   0  860.61   31.60
   3  -6   0  928.01   31.40
   3  -6   0  900.41   30.10
   3  -6   0  926.41   30.60
   3  -6   0  935.91   31.70
   3  -6   0  914.81   30.00
   3  -6   0  990.60   30.40
  -3   6   0  911.61   30.30
  -3   6   0  905.61   30.40
  -3   6   0  964.20   30.00
  -3   6   0  931.91   29.40
  -3   6   0  959.60   29.60
  -3   6   0  908.21   30.00
  -3   6   0  976.70   29.90
   2  -6   0   33.70    4.20
   2  -6   0   30.90    2.60
   2  -6   0   28.20    2.50
   2  -6   0   27.90    2.90
   2  -6   0   30.90    2.60
  -2   6   0   33.00    3.20
  -2   6   0   29.80    2.30
  -2   6   0   31.10    2.20
  -2   6   0   34.40    2.00
  -2   6   0   32.50    2.20
   1  -6   0   89.29    5.00
   1  -6   0   97.69    4.00
   1  -6   0   89.09    5.40
   1  -6   0   92.09    3.90
   1  -6   0   96.69    4.30
  -1   6   0   87.19    3.90
  -1   6   0   92.19    4.20
  -1   6   0   80.29    3.90
  -1   6   0   89.69    4.10
  -1   6   0   90.19    3.70
  -1   6   0   94.49    3.60
   0  -6   0  431.66   14.00
   0  -6   0  432.76   13.90
   0  -6   0  439.76   14.50
   0  -6   0  410.96   14.30
   0  -6   0  429.86   14.60
   0   6   0  421.56   13.90
   0   6   0  405.66   14.10
   0   6   0  405.96   14.00
   0   6   0  436.56   14.00
   0   6   0  436.06   14.20
  -1  -6   0 1100.99   36.10
  -1  -6   0 1121.39   36.00
  -1  -6   0 1167.08   36.00
  -1  -6   0 1138.59   36.50
   1   6   0 1212.98   36.40
   1   6   0 1133.89   36.00
   1   6   0 1145.69   36.10
   1   6   0 1113.59   36.20
  -2  -6   0  385.36   12.50
  -2  -6   0  382.46   13.00
  -2  -6   0  386.26   12.50
  -2  -6   0  364.06   12.50
   2   6   0  375.66   13.00
   2   6   0  354.76   13.20
   2   6   0  375.06   13.50
   2   6   0  366.06   12.70
   2   6   0  413.06   13.00
  -3  -6   0   32.60    2.40
  -3  -6   0   24.50    3.50
   3   6   0   26.20    2.80
   3   6   0   28.20    3.20
   3   6   0   32.20    4.40
   3   6   0   33.60    2.80
   3   6   0   26.50    3.10
   3   6   0   31.60    4.10
   3   6   0   35.70    4.10
  -4  -6   0  358.16   14.20
  -4  -6   0  351.06   12.30
  -4  -6   0  369.36   12.30
   4   6   0  365.66   13.70
   4   6   0  361.36   13.00
   4   6   0  372.86   13.70
   4   6   0  389.66   15.50
   4   6   0  350.76   13.10
  -5  -6   0   20.00    3.60
  -5  -6   0   13.00    4.80
  -5  -6   0   20.10    3.10
   5   6   0   26.90    5.00
   5   6   0   22.80    3.60
   5   6   0   21.40    3.30
   5   6   0   14.30    3.60
  -6  -6   0   20.60    3.50
  -6  -6   0   19.50    3.30
   6   6   0   15.50    4.50
   6   6   0   20.20    3.30
   6   6   0   20.50    2.70
  -7  -6   0   75.99    5.60
   7   6   0   99.09    4.10
   7   6   0   90.69    5.20
   7   6   0  102.59    4.50
   7  -7   0   58.19    3.30
   7  -7   0   54.19    4.60
   7  -7   0   56.39    5.10
  -7   7   0   60.89    5.60
  -7   7   0   54.29    3.30
  -7   7   0   55.69    3.30
   6  -7   0    3.60    3.10
   6  -7   0    5.10    3.00
   6  -7   0    2.80    3.40
  -6   7   0    2.50    2.50
  -6   7   0    6.60    2.80
  -6   7   0    1.60    3.00
  -6   7   0   -0.40    1.60
   5  -7   0   31.80    4.80
   5  -7   0   37.00    5.50
   5  -7   0   31.60    4.90
  -5   7   0   31.40    2.80
  -5   7   0   33.70    4.50
  -5   7   0   23.90    4.60
  -5   7   0   34.60    4.10
  -5   7   0   37.70    3.50
   4  -7   0  143.59    7.10
   4  -7   0  129.79    7.60
   4  -7   0  121.89    7.50
   4  -7   0  127.79    9.10
  -4   7   0  129.99    5.90
  -4   7   0  118.69    5.60
  -4   7   0  122.89    6.10
  -4   7   0  114.39    7.70
  -4   7   0  135.39    5.60
   3  -7   0   40.00    3.80
   3  -7   0   43.60    5.00
   3  -7   0   37.90    5.30
   3  -7   0   41.00    6.40
  -3   7   0   38.30    2.80
  -3   7   0   39.60    3.10
  -3   7   0   34.30    2.90
  -3   7   0   31.00    3.00
  -3   7   0   40.70    4.40
  -3   7   0   36.80    3.70
   2  -7   0  395.46   15.00
   2  -7   0  375.16   13.70
   2  -7   0  394.26   13.40
   2  -7   0  379.06   15.10
   2  -7   0  386.26   13.60
   2  -7   0  373.76   14.10
   2  -7   0  402.46   14.10
  -2   7   0  396.06   13.40
  -2   7   0  401.86   13.20
  -2   7   0  378.36   14.10
  -2   7   0  425.46   13.40
  -2   7   0  418.16   13.50
  -2   7   0  400.76   13.50
  -2   7   0  393.76   13.90
  -2   7   0  395.26   13.70
   1  -7   0  541.85   19.60
   1  -7   0  539.15   18.20
   1  -7   0  536.05   18.00
   1  -7   0  545.65   18.80
   1  -7   0  553.44   18.10
   1  -7   0  560.14   18.70
  -1   7   0  588.44   19.70
  -1   7   0  562.84   18.00
  -1   7   0  560.64   18.10
  -1   7   0  542.55   18.40
  -1   7   0  545.45   18.50
  -1   7   0  542.65   18.40
   0  -7   0  826.12   26.00
   0  -7   0  800.72   26.10
   0  -7   0  799.82   27.20
   0  -7   0  813.82   26.70
   0   7   0  828.72   26.10
   0   7   0  801.12   26.70
   0   7   0  819.32   26.30
   0   7   0  819.72   25.90
   0   7   0  814.52   26.40
   0   7   0  790.02   26.30
   0   7   0  810.42   26.40
  -1  -7   0  111.89    5.30
  -1  -7   0  114.59    4.80
  -1  -7   0  106.09    5.00
  -1  -7   0  115.89    5.00
   1   7   0   99.29    5.00
   1   7   0  114.59    4.50
   1   7   0  115.29    5.10
   1   7   0  110.99    5.80
   1   7   0  108.99    5.50
   1   7   0  111.09    4.70
   1   7   0  110.59    5.40
  -2  -7   0  278.67   10.10
  -2  -7   0  282.57   10.60
  -2  -7   0  268.67   10.10
  -2  -7   0  286.97   10.00
   2   7   0  284.17   10.40
   2   7   0  294.57   10.40
   2   7   0  290.87   10.10
   2   7   0  292.17   10.80
   2   7   0  288.07   10.90
   2   7   0  293.57   10.40
  -3  -7   0   13.70    2.40
  -3  -7   0   14.30    2.60
  -3  -7   0   16.60    2.80
   3   7   0   10.50    2.10
   3   7   0   17.90    3.20
   3   7   0   15.80    2.90
   3   7   0   14.60    3.00
   3   7   0   11.40    2.20
   3   7   0   14.40    2.70
  -4  -7   0   44.10    4.10
  -4  -7   0   53.99    3.40
   4   7   0   50.09    5.10
   4   7   0   53.09    5.00
   4   7   0   37.40    4.70
   4   7   0   49.90    4.00
   4   7   0   51.09    3.90
  -5  -7   0   83.99    9.80
  -5  -7   0   81.09    4.40
  -5  -7   0   71.29    5.00
   5   7   0   82.39    4.90
   5   7   0   87.79    6.10
   5   7   0   74.99    5.90
   5   7   0   81.69    5.10
  -6  -7   0   21.70    3.70
  -6  -7   0   19.70    3.50
   6   7   0   26.40    3.10
   6   7   0   22.20    2.90
   6   7   0   25.40    4.60
   6   7   0   29.00    4.60
   7   7   0    0.90    1.60
   7  -8   0   90.09    5.70
   7  -8   0   95.89    4.90
   7  -8   0  104.19    4.90
   7  -8   0   98.69    4.30
  -7   8   0   96.59    4.40
   6  -8   0   31.00    5.50
   6  -8   0   30.50    4.60
  -6   8   0   26.50    3.70
  -6   8   0   41.90    6.50
  -6   8   0   29.30    3.70
  -6   8   0   36.30    2.60
   5  -8   0    9.30    3.60
   5  -8   0    9.50    3.30
   5  -8   0   13.80    4.10
  -5   8   0   15.50    3.20
  -5   8   0   18.40    3.00
  -5   8   0   19.70    2.80
  -5   8   0   16.30    3.00
  -5   8   0    8.80    3.60
   4  -8   0   49.10    6.60
   4  -8   0   58.89    6.00
   4  -8   0   47.10    7.10
   4  -8   0   51.49    5.60
  -4   8   0   47.50    4.40
  -4   8   0   58.19    4.70
  -4   8   0   52.19    5.20
  -4   8   0   46.90    3.30
  -4   8   0   47.80    4.90
  -4   8   0   45.10    3.40
   3  -8   0   70.39    6.20
   3  -8   0   65.69    7.00
   3  -8   0   65.39    7.10
   3  -8   0   75.19    5.50
  -3   8   0   72.79    3.90
  -3   8   0   69.99    4.40
  -3   8   0   74.29    4.50
  -3   8   0   69.49    4.90
  -3   8   0   67.99    4.20
  -3   8   0   57.59    4.90
   2  -8   0   27.60    4.80
   2  -8   0   22.20    4.40
   2  -8   0   27.30    3.80
   2  -8   0   35.10    3.70
   2  -8   0   28.50    4.40
  -2   8   0   31.00    2.80
  -2   8   0   24.80    3.20
  -2   8   0   24.20    3.50
  -2   8   0   20.80    3.60
  -2   8   0   25.80    3.30
  -2   8   0   26.50    3.10
  -2   8   0   17.70    3.50
  -2   8   0   29.10    2.40
   1  -8   0  764.02   27.90
   1  -8   0  752.42   26.30
   1  -8   0  819.72   27.70
   1  -8   0  808.12   27.00
   1  -8   0  831.02   26.20
   1  -8   0  822.12   26.90
  -1   8   0  815.82   26.80
  -1   8   0  836.62   26.50
  -1   8   0  808.42   26.20
  -1   8   0  820.12   26.40
  -1   8   0  836.72   26.10
  -1   8   0  820.12   26.50
  -1   8   0  750.82   26.60
  -1   8   0  822.62   26.20
  -1   8   0  801.22   26.60
   0  -8   0  431.56   15.20
   0  -8   0  435.56   14.50
   0  -8   0  435.66   16.00
   0  -8   0  418.86   15.20
   0   8   0  438.86   14.50
   0   8   0  425.56   15.10
   0   8   0  427.26   14.60
   0   8   0  394.96   14.90
   0   8   0  437.96   14.50
   0   8   0  426.56   14.80
   0   8   0  434.56   14.80
   0   8   0  413.76   15.10
  -1  -8   0  724.63   23.10
  -1  -8   0  720.43   23.60
  -1  -8   0  675.93   23.80
   1   8   0  731.73   23.50
   1   8   0  712.43   23.80
   1   8   0  692.83   23.80
   1   8   0  713.63   23.30
   1   8   0  705.03   23.30
   1   8   0  695.53   23.20
   1   8   0  718.73   23.10
   1   8   0  703.33   23.20
  -2  -8   0  122.89    5.30
  -2  -8   0  118.89    6.40
  -2  -8   0  112.49    5.80
   2   8   0  121.59    5.60
   2   8   0  125.99    6.50
   2   8   0  116.29    6.20
   2   8   0  112.89    5.60
   2   8   0  122.19    6.20
  -3  -8   0   28.50    4.00
  -3  -8   0   23.50    2.70
   3   8   0   20.30    3.90
   3   8   0   27.10    3.80
   3   8   0   26.50    3.10
   3   8   0   25.90    3.50
   3   8   0   26.20    4.60
   3   8   0   24.90    3.50
  -4  -8   0   17.70    4.90
  -4  -8   0   17.20    2.80
   4   8   0   22.60    4.20
   4   8   0   22.90    2.80
   4   8   0   21.70    3.30
   4   8   0   19.50    3.40
  -5  -8   0    0.30    2.20
  -5  -8   0    1.10    2.50
   5   8   0    2.10    1.80
   5   8   0    2.70    2.20
  -6  -8   0   27.80    4.50
   6   8   0   28.00    2.30
   6   8   0   30.80    3.00
   6   8   0   27.70    4.20
   7  -9   0    8.00    1.50
   7  -9   0    7.30    2.00
  -7   9   0    7.00    1.60
   6  -9   0    9.80    2.30
   6  -9   0    9.00    2.10
  -6   9   0    9.30    2.40
  -6   9   0    9.60    2.30
   5  -9   0  158.08    8.90
   5  -9   0  154.68    7.20
   5  -9   0  146.89    8.20
  -5   9   0  145.49    6.00
  -5   9   0  148.49    7.20
  -5   9   0  143.19    8.20
  -5   9   0  166.98    7.40
  -5   9   0  133.29    9.90
   4  -9   0    2.70    3.40
   4  -9   0    5.90    3.50
   4  -9   0   18.80    6.80
   4  -9   0    2.70    4.00
  -4   9   0    4.20    3.60
  -4   9   0    9.50    3.20
  -4   9   0    5.30    2.30
  -4   9   0   11.50    2.90
  -4   9   0   12.20    3.20
  -4   9   0   10.10    2.60
   3  -9   0    9.60    3.70
   3  -9   0   11.30    4.20
   3  -9   0    6.80    3.40
  -3   9   0    7.20    2.60
  -3   9   0    9.90    2.80
  -3   9   0    9.90    2.80
  -3   9   0    6.60    2.40
  -3   9   0    8.60    2.60
  -3   9   0    6.10    1.90
   2  -9   0   67.49    6.10
   2  -9   0   72.39    5.70
   2  -9   0   73.89    6.20
   2  -9   0   63.99    7.00
  -2   9   0   68.29    4.20
  -2   9   0   71.39    4.60
  -2   9   0   73.99    4.50
  -2   9   0   67.39    4.20
  -2   9   0   78.09    5.00
  -2   9   0   68.49    3.90
   1  -9   0    3.50    3.30
   1  -9   0    6.40    2.90
   1  -9   0   10.20    2.20
   1  -9   0   18.90    5.10
   1  -9   0   10.20    3.20
  -1   9   0    6.50    1.50
  -1   9   0    4.00    3.00
  -1   9   0    7.80    2.00
  -1   9   0    8.80    2.10
  -1   9   0    5.10    2.00
  -1   9   0    5.60    2.00
  -1   9   0    5.50    1.80
   0  -9   0   59.19    6.50
   0  -9   0   45.60    3.70
   0  -9   0   50.59    4.70
   0  -9   0   39.80    5.20
   0   9   0   48.80    3.50
   0   9   0   46.40    3.70
   0   9   0   50.29    5.50
   0   9   0   44.80    3.50
   0   9   0   48.30    3.20
   0   9   0   43.60    3.50
   0   9   0   47.60    4.40
   0   9   0   45.70    4.40
  -1  -9   0  208.08    9.60
  -1  -9   0  212.98   10.20
  -1  -9   0  228.98    9.60
   1   9   0  226.88    8.70
   1   9   0  221.08    8.80
   1   9   0  228.48    9.00
   1   9   0  219.38    8.80
   1   9   0  214.48    9.40
   1   9   0  230.38    8.60
   1   9   0  219.68    9.20
   1   9   0  228.88    8.60
  -2  -9   0  336.97   14.60
  -2  -9   0  375.06   13.50
  -2  -9   0  366.86   12.80
   2   9   0  356.96   13.70
   2   9   0  345.97   13.20
   2   9   0  354.76   12.50
   2   9   0  357.86   13.10
   2   9   0  369.96   12.90
   2   9   0  376.46   13.60
   2   9   0  366.16   12.90
  -3  -9   0   41.90    4.10
  -3  -9   0   44.20    3.70
   3   9   0   47.90    4.00
   3   9   0   42.90    4.00
   3   9   0   43.10    5.20
   3   9   0   35.70    4.80
   3   9   0   42.20    3.60
   3   9   0   45.80    4.40
  -4  -9   0   24.80    4.50
  -4  -9   0   26.10    3.50
   4   9   0   32.60    3.60
   4   9   0   26.00    3.40
   4   9   0   30.10    3.70
   4   9   0   23.80    4.20
  -5  -9   0    2.60    2.60
  -5  -9   0    3.50    2.90
   5   9   0    3.30    2.30
   5   9   0    5.10    1.80
   5   9   0   -0.90    1.90
  -6  -9   0    1.90    3.70
   6   9   0    3.00    2.50
   6   9   0    3.80    1.40
   6   9   0    2.10    1.20
   6 -10   0   75.59    4.20
   6 -10   0   76.49    4.90
   6 -10   0   74.99    5.20
  -6  10   0   83.49    3.90
   5 -10   0    4.60    2.40
   5 -10   0    7.60    2.90
   5 -10   0    2.80    2.50
  -5  10   0    6.40    3.30
  -5  10   0    4.90    3.80
   4 -10   0   30.50    4.60
   4 -10   0   29.00    4.00
   4 -10   0   24.30    4.00
  -4  10   0   23.80    4.10
  -4  10   0   28.40    4.00
  -4  10   0   29.10    4.70
  -4  10   0   28.30    3.80
   3 -10   0  237.38   11.20
   3 -10   0  242.48   12.10
   3 -10   0  231.78   12.20
   3 -10   0  243.78   11.10
  -3  10   0  235.98   10.10
  -3  10   0  250.17    9.90
  -3  10   0  251.27   10.00
  -3  10   0  239.68    9.40
  -3  10   0  250.97    9.60
   2 -10   0   12.40    4.70
   2 -10   0   23.50    4.30
   2 -10   0   29.30    6.20
  -2  10   0   26.70    3.80
  -2  10   0   17.40    3.00
  -2  10   0   22.80    4.20
  -2  10   0   28.40    3.90
  -2  10   0   21.10    3.60
  -2  10   0   18.90    3.30
   1 -10   0   27.30    4.40
   1 -10   0   25.70    5.40
   1 -10   0   20.90    3.80
   1 -10   0   21.30    5.40
   1 -10   0   24.90    3.90
  -1  10   0   21.80    3.40
  -1  10   0   23.00    3.40
  -1  10   0   30.40    3.40
  -1  10   0   21.60    3.20
  -1  10   0   25.70    3.80
  -1  10   0   25.40    3.50
   0 -10   0  132.89    5.70
   0 -10   0  134.19    8.10
   0 -10   0  127.29    7.50
   0 -10   0  132.79    8.80
   0  10   0  136.59    7.10
   0  10   0  131.29    6.30
   0  10   0  123.69    6.00
   0  10   0  131.69    6.30
   0  10   0  127.49    6.20
   0  10   0  128.29    6.70
   0  10   0  116.89    6.30
  -1 -10   0  270.67   11.90
  -1 -10   0  284.27   10.10
  -1 -10   0  264.97   12.20
  -1 -10   0  277.17   11.10
   1  10   0  281.47   11.00
   1  10   0  283.97   10.50
   1  10   0  262.77   10.80
   1  10   0  267.47   10.50
   1  10   0  267.97   11.10
   1  10   0  272.17   10.50
   1  10   0  277.97   10.00
  -2 -10   0   46.50    8.60
  -2 -10   0   50.99    6.10
  -2 -10   0   48.20    4.10
   2  10   0   38.80    5.10
   2  10   0   42.50    5.10
   2  10   0   45.10    3.80
   2  10   0   41.70    3.50
   2  10   0   45.60    4.20
   2  10   0   47.00    4.20
   2  10   0   57.39    4.60
  -3 -10   0    7.10    2.40
  -3 -10   0    7.70    2.40
  -3 -10   0    3.10    6.00
   3  10   0    8.40    2.10
   3  10   0    0.30    2.90
   3  10   0    8.30    2.60
   3  10   0    8.00    2.30
   3  10   0    8.80    2.10
  -4 -10   0    2.00    2.30
   4  10   0   -0.10    2.30
   4  10   0    2.80    1.60
   4  10   0    1.70    1.80
  -5 -10   0    9.30    5.80
  -5 -10   0   18.60    4.50
  -5 -10   0   16.70    2.70
   5  10   0   22.20    2.70
   5  10   0   22.70    2.60
   5  10   0   22.90    2.40
   6 -11   0    5.40    1.80
   6 -11   0    5.90    3.10
   6 -11   0    6.70    3.60
  -6  11   0    7.60    1.90
   5 -11   0   10.50    2.30
   5 -11   0   11.60    2.10
   5 -11   0   10.20    1.90
  -5  11   0   12.20    2.50
  -5  11   0   13.80    2.10
   4 -11   0    0.30    2.80
   4 -11   0    1.70    3.10
   4 -11   0    1.00    2.60
  -4  11   0    4.50    2.70
  -4  11   0    2.00    2.50
  -4  11   0    0.90    2.00
  -4  11   0    2.60    2.10
   3 -11   0    3.30    3.60
   3 -11   0    0.60    4.10
   3 -11   0    4.00    3.40
  -3  11   0    6.80    2.50
  -3  11   0    2.90    2.40
  -3  11   0    4.40    1.60
  -3  11   0    3.30    2.90
   2 -11   0  168.58    9.90
   2 -11   0  166.88    9.00
   2 -11   0  143.59    9.00
   2 -11   0  172.38    9.90
   2 -11   0  166.98    9.50
  -2  11   0  179.78    7.50
  -2  11   0  181.68    7.50
  -2  11   0  163.18    8.70
  -2  11   0  167.28    7.70
   1 -11   0  178.08   12.50
   1 -11   0  166.98    8.60
   1 -11   0  177.08    9.40
   1 -11   0  164.58   10.20
   1 -11   0  176.38    7.60
  -1  11   0  200.28    7.80
  -1  11   0  176.08    7.80
  -1  11   0  181.48    9.20
  -1  11   0  198.68    7.90
   0 -11   0  146.69    7.50
   0 -11   0  150.28    6.60
   0 -11   0  125.59    9.80
   0 -11   0  144.69    8.60
   0  11   0  152.88    6.50
   0  11   0  144.19    6.70
   0  11   0  149.88    6.80
   0  11   0  127.49    7.70
   0  11   0  146.99    7.20
   0  11   0  134.89    7.70
   0  11   0  150.68    7.20
  -1 -11   0    8.60    2.40
  -1 -11   0   10.10    7.20
  -1 -11   0    2.50    3.30
   1  11   0    2.50    1.70
   1  11   0    1.50    2.90
   1  11   0    5.60    4.10
   1  11   0    3.50    2.20
   1  11   0    4.30    1.70
   1  11   0    1.50    2.60
   1  11   0    2.70    2.10
  -2 -11   0    2.80    3.30
  -2 -11   0    1.20    2.50
   2  11   0    7.10    5.20
   2  11   0    1.20    2.70
   2  11   0    0.70    1.60
   2  11   0   -0.50    2.00
   2  11   0    7.90    5.20
   2  11   0    4.20    2.70
  -3 -11   0    0.70    2.80
  -3 -11   0    1.50    2.60
  -3 -11   0    0.10    3.70
   3  11   0    5.10    1.50
   3  11   0    1.20    1.60
   3  11   0    4.20    2.60
  -4 -11   0   14.50    3.00
  -4 -11   0   10.90    2.60
  -4 -11   0    4.90    4.00
   4  11   0   11.50    1.90
   4  11   0   11.20    1.80
   4  11   0   16.00    2.50
  -5 -11   0   45.10    5.10
   5  11   0   41.00    2.20
   5  11   0   38.50    2.80
   5  11   0   29.80    2.90
   5 -12   0   12.70    2.10
   5 -12   0   12.20    3.00
   5 -12   0   16.70    3.50
  -5  12   0   15.20    3.40
   4 -12   0    2.00    2.70
   4 -12   0    1.40    2.40
   4 -12   0    6.30    2.70
  -4  12   0    2.80    1.90
  -4  12   0    4.60    1.90
  -4  12   0    4.60    2.40
   3 -12   0    2.30    2.80
   3 -12   0   12.70    3.70
   3 -12   0    2.90    2.10
  -3  12   0    1.10    1.30
  -3  12   0    2.40    2.20
  -3  12   0    4.20    2.10
   2 -12   0   61.29    7.30
   2 -12   0   71.69    6.10
   2 -12   0   58.69    5.50
  -2  12   0   58.29    3.70
  -2  12   0   65.79    4.40
  -2  12   0   56.99    4.90
  -2  12   0   52.19    6.00
   1 -12   0   97.99    6.20
   1 -12   0   95.89    7.10
  -1  12   0  109.19    6.10
  -1  12   0  102.19    7.00
   0 -12   0   39.20    5.90
   0 -12   0   46.60    5.40
   0 -12   0   49.99    4.40
   0  12   0   35.10    3.60
   0  12   0   49.60    5.60
  -1 -12   0   67.79    6.10
  -1 -12   0   81.89    5.90
  -1 -12   0   72.59    4.90
   1  12   0   72.59    4.40
   1  12   0   76.59    4.60
   1  12   0   85.69    3.90
   1  12   0   74.89    4.00
  -2 -12   0   70.99    5.30
  -2 -12   0   58.99    4.50
  -2 -12   0   81.39    7.10
   2  12   0   64.39    4.00
   2  12   0   62.29    3.40
   2  12   0   72.19    4.00
   2  12   0   58.79    4.30
   2  12   0   60.19    4.00
  -3 -12   0   55.59    4.40
  -3 -12   0   46.40    4.50
   3  12   0   48.30    3.40
   3  12   0   49.90    2.90
   3  12   0   52.39    3.50
  -4 -12   0   10.10    2.90
   4  12   0    9.20    1.60
   4  12   0    8.60    1.70
   4 -13   0   46.30    3.60
   4 -13   0   50.59    3.80
  -4  13   0   51.79    5.10
  -4  13   0   42.30    4.70
  -4  13   0   35.20    2.40
   3 -13   0   26.30    3.80
   3 -13   0   31.00    4.40
   3 -13   0   32.30    4.10
  -3  13   0   31.10    2.90
  -3  13   0   23.80    3.40
  -3  13   0   22.90    2.10
   2 -13   0    7.70    5.00
   2 -13   0   12.10    3.10
  -2  13   0   17.60    2.80
  -2  13   0   13.70    2.20
   1 -13   0   10.70    6.60
   1 -13   0    8.60    2.20
   1 -13   0   14.50    3.40
  -1  13   0    9.10    1.50
  -1  13   0    5.70    1.90
   0 -13   0   16.70    4.60
   0 -13   0   13.80    3.10
   0  13   0   11.60    2.00
   0  13   0   11.10    1.80
  -1 -13   0    7.30    3.20
  -1 -13   0    7.50    3.60
  -1 -13   0    8.50    3.00
   1  13   0    9.10    1.60
   1  13   0    9.00    1.30
   1  13   0    9.30    2.70
  -2 -13   0    2.80    3.50
  -2 -13   0   -3.60    3.20
   2  13   0    2.90    2.40
   2  13   0    1.90    2.40
   2 -14   0   30.40    4.00
  -2  14   0   23.50    1.90
  -2  14   0   18.80    1.80
   1 -14   0    5.60    2.10
  -1  14   0    5.70    1.10
  -1  14   0    7.30    1.30
   0 -14   0    1.60    2.70
   0  14   0    3.00    1.20
   0  14   0    1.30    1.30
  -1 -14   0   19.50    4.60
  -1 -14   0   17.10    3.10
   1  14  -1    4.60    1.50
  -1 -14   1    9.10    2.30
  -1 -14   1    8.40    3.50
   0  14  -1   11.40    1.80
   0  14  -1   16.40    2.30
   0 -14   1    8.70    3.40
   0 -14   1   15.90    2.70
  -1  14  -1   62.29    2.90
   1 -14   1   54.19    5.10
  -2  14  -1    3.40    1.20
   2 -14   1    4.20    1.90
   3  13  -1   35.70    3.60
   3  13  -1   44.30    2.90
   3  13  -1   43.70    2.50
  -3 -13   1   46.20    4.70
   2  13  -1    0.40    2.30
   2  13  -1   -2.20    1.60
   2  13  -1   -1.00    1.00
  -2 -13   1    1.30    2.70
  -2 -13   1    0.40    2.80
   1  13  -1   21.30    2.00
   1  13  -1   17.70    2.70
  -1 -13   1   17.20    3.10
  -1 -13   1   28.60    4.40
   0  13  -1  182.28    6.70
   0  13  -1  190.88    7.30
   0 -13   1  173.48    8.00
   0 -13   1  189.28    9.50
  -1  13  -1   43.90    3.10
  -1  13  -1   43.40    2.90
   1 -13   1   38.50    6.40
   1 -13   1   44.00    4.10
   1 -13   1   44.90    7.20
  -2  13  -1  133.19    5.40
  -2  13  -1  119.39    6.00
  -2  13  -1  118.39    5.30
   2 -13   1  127.39    7.10
   2 -13   1  123.69    8.50
   2 -13   1  129.39    7.00
  -3  13  -1   62.49    3.40
  -3  13  -1   64.79    4.20
  -3  13  -1   62.99    3.70
   3 -13   1   73.19    5.70
   3 -13   1   73.39    4.90
   3 -13   1   77.59    5.20
  -4  13  -1   -0.60    1.90
  -4  13  -1    6.10    1.60
  -4  13  -1    2.90    2.20
   4 -13   1    7.90    3.20
   4 -13   1    2.90    2.50
   4 -13   1   -0.50    2.80
   4  12  -1   10.80    1.80
   4  12  -1   14.60    2.30
   4  12  -1   16.70    3.00
  -4 -12   1   12.90    3.00
   3  12  -1    8.10    1.80
   3  12  -1   11.10    1.90
   3  12  -1    8.20    1.80
  -3 -12   1    6.50    2.60
  -3 -12   1    5.40    2.40
   2  12  -1   12.70    2.40
   2  12  -1   19.00    2.90
   2  12  -1   14.00    2.10
   2  12  -1   17.20    3.10
   2  12  -1   11.30    2.70
  -2 -12   1   10.50    2.80
  -2 -12   1    8.10    2.90
  -2 -12   1   17.70    4.10
   1  12  -1  161.08    8.20
   1  12  -1  177.98    7.70
  -1 -12   1  184.18    8.20
  -1 -12   1  179.28    7.50
  -1 -12   1  180.88    9.00
   0  12  -1  353.96   16.00
   0  12  -1  383.26   13.60
   0  12  -1  387.16   13.20
   0 -12   1  373.06   13.40
   0 -12   1  375.86   14.10
  -1  12  -1   41.70    3.90
  -1  12  -1   45.20    4.00
  -1  12  -1   45.80    6.10
  -1  12  -1   34.00    5.20
   1 -12   1   48.00    5.50
  -2  12  -1   72.19    5.00
  -2  12  -1   67.39    6.40
   2 -12   1   70.49    8.20
   2 -12   1   72.99    6.30
  -3  12  -1   11.40    1.70
  -3  12  -1   11.30    2.30
  -3  12  -1   10.00    2.30
   3 -12   1    5.00    2.90
   3 -12   1   10.20    3.20
   3 -12   1   11.90    4.00
  -4  12  -1   17.30    2.80
  -4  12  -1   17.30    2.50
  -4  12  -1   17.70    2.70
   4 -12   1   18.70    3.20
   4 -12   1   22.60    3.80
   4 -12   1   13.40    2.90
  -5  12  -1    8.00    2.30
  -5  12  -1    6.80    1.50
   5 -12   1    5.80    1.70
   5 -12   1    1.50    2.50
   5 -12   1    6.90    3.90
   5  11  -1    4.60    2.20
   5  11  -1    5.90    1.10
   5  11  -1    5.20    1.20
  -5 -11   1    3.00    3.70
   4  11  -1   18.70    2.70
   4  11  -1   13.50    2.00
   4  11  -1   18.40    2.90
  -4 -11   1   12.40    3.00
  -4 -11   1   17.20    3.00
   3  11  -1   25.50    4.50
   3  11  -1   19.50    3.10
  -3 -11   1   20.80    5.20
  -3 -11   1   14.50    3.30
   2  11  -1   91.39    4.80
   2  11  -1   92.39    5.10
   2  11  -1   96.39    5.40
   2  11  -1   99.59    5.90
   2  11  -1   83.49    4.50
   2  11  -1   92.99    5.40
  -2 -11   1   98.19    5.00
  -2 -11   1   99.69    5.90
  -2 -11   1   86.99    7.60
   1  11  -1  200.48    8.30
   1  11  -1  208.78    9.50
   1  11  -1  211.78    9.10
   1  11  -1  221.38    8.70
   1  11  -1  207.58    8.00
   1  11  -1  206.58    9.30
   1  11  -1  216.38    8.60
  -1 -11   1  198.28   11.10
  -1 -11   1  209.88    8.30
  -1 -11   1  223.78   10.00
  -1 -11   1  192.38   11.50
   0  11  -1  184.18    7.50
   0  11  -1  174.18    7.90
   0  11  -1  182.98    8.20
   0  11  -1  167.78    8.60
   0  11  -1  189.28    7.40
   0  11  -1  167.98    8.30
   0  11  -1  176.78    7.80
   0 -11   1  178.88    9.40
   0 -11   1  172.08    9.10
   0 -11   1  180.88    7.40
  -1  11  -1  139.99    8.10
  -1  11  -1  151.28    7.70
  -1  11  -1  168.18    7.20
  -1  11  -1  176.38    7.30
  -1  11  -1  158.08    7.50
  -1  11  -1  169.78    7.00
   1 -11   1  152.18    6.80
   1 -11   1  146.39    9.70
   1 -11   1  117.99   12.40
  -2  11  -1   39.60    6.00
  -2  11  -1   43.50    4.50
  -2  11  -1   37.90    4.10
  -2  11  -1   43.40    4.60
  -2  11  -1   30.90    5.70
  -2  11  -1   43.60    3.90
   2 -11   1   43.50    6.40
   2 -11   1   37.40    6.20
   2 -11   1   34.00    4.70
   2 -11   1   42.60    6.80
   2 -11   1   43.70    7.40
  -3  11  -1    6.30    3.30
  -3  11  -1    4.40    2.60
  -3  11  -1    5.20    2.50
  -3  11  -1    4.50    2.20
   3 -11   1    0.50    3.90
   3 -11   1    9.50    4.20
   3 -11   1   -0.20    3.50
  -4  11  -1   14.70    2.40
  -4  11  -1   15.80    2.90
  -4  11  -1   14.40    2.40
   4 -11   1   13.30    3.00
   4 -11   1   18.80    3.50
   4 -11   1   14.40    3.10
  -5  11  -1   26.10    3.20
  -5  11  -1   28.60    4.90
   5 -11   1   28.50    4.20
   5 -11   1   23.90    2.90
   5 -11   1   26.20    2.80
  -6  11  -1    6.50    1.40
   6 -11   1    2.90    3.00
   6 -11   1    4.40    1.80
   6 -11   1    9.70    2.90
   5  10  -1    7.20    1.30
   5  10  -1    3.90    1.50
   5  10  -1    9.40    1.90
  -5 -10   1   11.10    3.00
   4  10  -1    9.40    4.00
  -4 -10   1    6.10    2.60
  -4 -10   1   11.10    2.60
   3  10  -1  182.38    7.70
   3  10  -1  168.38    6.60
   3  10  -1  174.48    8.10
   3  10  -1  178.78    8.50
   3  10  -1  180.78    7.60
   3  10  -1  169.18    8.10
  -3 -10   1  189.18    7.50
  -3 -10   1  191.38    8.40
   2  10  -1   30.30    4.20
   2  10  -1   32.00    3.60
   2  10  -1   25.20    3.50
   2  10  -1   27.60    3.20
   2  10  -1   32.80    4.90
   2  10  -1   26.60    3.80
  -2 -10   1   27.40    5.20
  -2 -10   1   27.90    5.40
  -2 -10   1   29.70    4.40
  -2 -10   1   26.80    3.70
   1  10  -1   25.80    3.50
   1  10  -1   16.00    3.40
   1  10  -1   23.80    3.50
   1  10  -1   18.30    2.50
   1  10  -1   16.80    3.10
   1  10  -1   27.10    4.00
   1  10  -1   21.50    3.40
  -1 -10   1   18.40    3.10
  -1 -10   1   22.40    3.20
  -1 -10   1   17.20    4.00
  -1 -10   1   11.30    4.60
   0  10  -1 1318.97   44.00
   0  10  -1 1371.66   44.30
   0  10  -1 1395.16   44.00
   0  10  -1 1430.76   44.20
   0  10  -1 1354.86   43.70
   0  10  -1 1332.17   43.60
   0  10  -1 1351.96   44.20
   0 -10   1 1398.86   43.60
   0 -10   1 1382.46   44.50
   0 -10   1 1328.57   45.00
  -1  10  -1   14.90    3.20
  -1  10  -1   11.20    2.70
  -1  10  -1   10.80    2.60
  -1  10  -1   18.20    2.80
  -1  10  -1   12.10    3.10
  -1  10  -1   12.60    3.00
  -1  10  -1   13.80    2.00
   1 -10   1   15.10    3.50
   1 -10   1   11.80    2.50
   1 -10   1    0.70    5.70
   1 -10   1   11.10    3.70
  -2  10  -1  121.29    5.80
  -2  10  -1  124.69    6.10
  -2  10  -1  122.79    6.40
  -2  10  -1  112.49    6.20
  -2  10  -1  126.19    6.10
  -2  10  -1  115.89    6.30
   2 -10   1  114.59    8.30
   2 -10   1  127.39    9.00
   2 -10   1  119.89    7.20
   2 -10   1  119.29    7.90
   2 -10   1  116.49    6.90
   2 -10   1  123.89    8.80
  -3  10  -1   32.30    4.90
  -3  10  -1   30.70    4.40
  -3  10  -1   34.70    3.90
  -3  10  -1   27.50    3.90
  -3  10  -1   34.60    4.40
  -3  10  -1   40.50    5.00
   3 -10   1   31.20    5.00
   3 -10   1   38.10    5.80
   3 -10   1   49.20    6.50
   3 -10   1   31.20    5.70
  -4  10  -1  109.99    6.30
  -4  10  -1  103.59    5.70
  -4  10  -1  113.29    6.20
  -4  10  -1  114.19    6.30
   4 -10   1  117.69    8.20
   4 -10   1  113.99    7.30
   4 -10   1  111.69    7.20
  -5  10  -1   72.49    6.20
  -5  10  -1   77.99    6.20
  -5  10  -1   93.99    5.20
   5 -10   1   89.09    5.50
   5 -10   1   91.99    5.10
   5 -10   1   86.69    5.60
  -6  10  -1    1.10    1.40
   6 -10   1    3.60    1.60
   6 -10   1    5.10    2.00
   6 -10   1    4.80    2.60
   6   9  -1    4.70    1.50
   6   9  -1    4.60    1.70
   6   9  -1    5.10    1.80
  -6  -9   1    2.40    4.00
   5   9  -1    1.90    1.70
   5   9  -1    3.30    1.60
   5   9  -1    2.50    1.50
  -5  -9   1    0.80    3.00
   4   9  -1   97.99    5.30
   4   9  -1   89.49    5.10
   4   9  -1   97.09    6.20
  -4  -9   1   75.09    9.10
  -4  -9   1   98.69    4.90
  -4  -9   1   98.59    6.10
   3   9  -1   27.50    3.40
   3   9  -1   26.20    4.70
   3   9  -1   20.00    3.20
   3   9  -1   31.90    5.20
   3   9  -1   19.40    3.30
   3   9  -1   24.10    3.50
  -3  -9   1   23.30    3.40
  -3  -9   1   29.50    3.00
   2   9  -1   25.50    3.70
   2   9  -1   27.60    3.40
   2   9  -1   36.50    4.50
   2   9  -1   27.70    2.70
   2   9  -1   28.10    3.90
   2   9  -1   28.80    3.20
   2   9  -1   27.00    3.90
  -2  -9   1   34.80    4.70
  -2  -9   1   29.60    5.00
  -2  -9   1   22.50    3.20
   1   9  -1  216.78    8.90
   1   9  -1  214.78    8.30
   1   9  -1  214.48    8.20
   1   9  -1  202.48    9.40
   1   9  -1  203.18    8.30
   1   9  -1  208.28    8.00
   1   9  -1  212.78    8.50
  -1  -9   1  209.18    9.20
  -1  -9   1  212.28    8.20
  -1  -9   1  210.68    8.90
   0   9  -1  143.39    5.90
   0   9  -1  143.09    6.20
   0   9  -1  142.79    6.10
   0   9  -1  130.89    7.30
   0   9  -1  128.69    6.70
   0   9  -1  143.59    6.10
   0   9  -1  152.18    6.50
   0   9  -1  148.59    7.30
   0   9  -1  140.99    7.30
   0  -9   1  154.18    7.30
   0  -9   1  151.88    6.20
   0  -9   1  155.28    8.30
   0  -9   1  154.28    7.10
  -1   9  -1    7.10    1.70
  -1   9  -1    4.80    2.70
  -1   9  -1    5.80    2.00
  -1   9  -1    5.00    1.80
  -1   9  -1    8.70    1.70
  -1   9  -1    6.00    1.50
  -1   9  -1    4.80    1.80
   1  -9   1    4.60    2.00
   1  -9   1    5.10    2.60
   1  -9   1    4.20    3.50
   1  -9   1    1.50    5.00
   1  -9   1    7.40    3.10
  -2   9  -1   68.09    4.50
  -2   9  -1   67.89    4.40
  -2   9  -1   64.69    3.80
  -2   9  -1   68.69    4.40
  -2   9  -1   63.59    4.00
  -2   9  -1   66.29    4.60
   2  -9   1   62.49    6.90
   2  -9   1   70.59    5.40
   2  -9   1   73.69    7.20
   2  -9   1   75.39    5.80
  -3   9  -1   -1.70    2.20
  -3   9  -1   -0.10    2.30
  -3   9  -1    3.90    2.60
  -3   9  -1    3.30    1.90
  -3   9  -1    4.00    2.60
  -3   9  -1    0.40    2.20
  -3   9  -1    1.80    2.20
   3  -9   1   -3.90    3.70
   3  -9   1    6.40    3.60
   3  -9   1    2.70    3.50
   3  -9   1    6.20    3.90
  -4   9  -1   -0.10    3.10
  -4   9  -1   -5.00    4.10
  -4   9  -1   -1.80    2.30
  -4   9  -1    0.90    2.90
  -4   9  -1    2.40    2.50
  -4   9  -1   -1.60    4.50
  -4   9  -1    4.00    2.30
  -4   9  -1    3.30    2.70
   4  -9   1    1.80    4.10
   4  -9   1    1.30    8.60
   4  -9   1    3.10    3.80
   4  -9   1    0.20    3.30
  -5   9  -1   63.39    5.60
  -5   9  -1   62.49    4.10
  -5   9  -1   61.89    5.10
  -5   9  -1   56.99    5.30
   5  -9   1   69.09    5.60
   5  -9   1   62.89    5.90
   5  -9   1   68.09    6.60
  -6   9  -1   15.90    2.30
  -6   9  -1   12.10    2.30
   6  -9   1   18.90    3.00
   6  -9   1    9.90    2.80
   6  -9   1   13.40    3.10
  -7   9  -1   18.20    3.60
   7  -9   1   28.90    4.30
   7  -9   1   19.60    2.20
   7  -9   1   22.60    3.70
   7   8  -1  113.99    5.50
   6   8  -1    1.20    1.00
   6   8  -1    1.70    2.70
   6   8  -1   -0.20    1.60
   5   8  -1    0.50    2.90
   5   8  -1    5.30    1.80
   5   8  -1    4.20    2.30
  -5  -8   1    1.00    2.40
  -5  -8   1    3.70    2.80
   4   8  -1    8.10    2.30
   4   8  -1    8.40    1.90
   4   8  -1    4.60    3.10
   4   8  -1   10.40    3.10
  -4  -8   1   14.60    2.70
  -4  -8   1   11.80    2.20
   3   8  -1   21.30    3.20
   3   8  -1   18.90    3.30
   3   8  -1   20.60    3.40
   3   8  -1   20.90    4.60
   3   8  -1   19.50    3.20
   3   8  -1   21.10    3.20
   3   8  -1   23.20    3.00
  -3  -8   1   21.70    4.30
  -3  -8   1   23.00    3.80
   2   8  -1   67.59    4.50
   2   8  -1   77.29    4.40
   2   8  -1   80.39    4.30
   2   8  -1   82.99    5.10
  -2  -8   1   73.69    4.20
  -2  -8   1   75.89    5.10
  -2  -8   1   75.09    4.60
   1   8  -1  102.19    5.20
   1   8  -1   93.79    6.20
   1   8  -1   92.09    4.50
   1   8  -1  102.39    4.70
   1   8  -1   93.29    4.90
   1   8  -1   98.89    5.00
   1   8  -1   98.09    4.80
   1   8  -1  102.19    4.40
  -1  -8   1  103.19    4.60
  -1  -8   1   89.79    5.40
  -1  -8   1   98.39    5.30
   0   8  -1  295.57   11.10
   0   8  -1  269.37   11.20
   0   8  -1  306.67   10.80
   0   8  -1  302.57   10.80
   0   8  -1  286.67   11.10
   0   8  -1  313.87   10.20
   0   8  -1  257.17   11.30
   0   8  -1  289.87   10.40
   0   8  -1  279.07   10.90
   0   8  -1  305.57   10.50
   0   8  -1  303.57   10.40
   0  -8   1  308.77   10.40
   0  -8   1  297.67   11.20
   0  -8   1  303.67   11.10
   0  -8   1  293.97   12.60
  -1   8  -1   16.60    2.90
  -1   8  -1   15.10    2.90
  -1   8  -1   16.60    2.30
  -1   8  -1   13.70    2.00
  -1   8  -1   18.60    2.30
  -1   8  -1   10.80    3.00
  -1   8  -1   14.70    2.10
  -1   8  -1   16.00    2.20
  -1   8  -1   15.30    3.10
   1  -8   1   24.80    5.40
   1  -8   1   17.00    3.00
   1  -8   1   18.70    3.50
   1  -8   1   17.60    2.70
   1  -8   1   16.30    3.40
  -2   8  -1  400.06   13.50
  -2   8  -1  405.26   13.90
  -2   8  -1  387.66   14.00
  -2   8  -1  377.46   13.20
  -2   8  -1  397.46   13.90
  -2   8  -1  409.36   13.90
  -2   8  -1  411.56   13.70
   2  -8   1  405.46   15.30
   2  -8   1  382.86   14.30
   2  -8   1  399.76   14.30
   2  -8   1  376.46   15.10
  -3   8  -1  200.78    8.00
  -3   8  -1  208.18    8.10
  -3   8  -1  205.98    7.90
  -3   8  -1  205.48    8.80
  -3   8  -1  213.88    8.30
  -3   8  -1  208.08    8.60
   3  -8   1  206.78   10.50
   3  -8   1  205.28    9.80
   3  -8   1  214.28    9.20
   3  -8   1  217.88   10.30
  -4   8  -1   99.99    5.50
  -4   8  -1  110.69    5.40
  -4   8  -1   95.69    4.90
  -4   8  -1  101.69    5.50
  -4   8  -1   94.19    6.30
  -4   8  -1  105.79    6.00
   4  -8   1  103.49    7.80
   4  -8   1  100.79    7.10
   4  -8   1  112.79    6.90
  -5   8  -1  136.99    6.80
  -5   8  -1  128.59    7.60
  -5   8  -1  145.09    6.90
  -5   8  -1  143.69    5.60
  -5   8  -1  137.89    6.50
   5  -8   1  152.08    8.90
   5  -8   1  142.29    7.60
   5  -8   1  144.49    8.20
  -6   8  -1   25.80    2.90
  -6   8  -1   36.90    5.10
  -6   8  -1   20.10    4.50
   6  -8   1   23.00    4.20
   6  -8   1   34.00    5.00
  -7   8  -1   78.69    5.60
  -7   8  -1   65.99    4.10
   7  -8   1   67.59    4.80
   7  -8   1   69.29    3.50
   7   7  -1    1.20    1.20
   7   7  -1    0.50    0.90
   6   7  -1   11.20    3.50
   6   7  -1   10.00    3.40
   6   7  -1   10.10    1.60
   6   7  -1    8.00    1.90
  -6  -7   1    4.70    2.90
   5   7  -1   21.30    3.70
   5   7  -1   19.10    2.50
   5   7  -1   21.20    4.10
   5   7  -1   16.20    3.50
  -5  -7   1   18.00    5.50
  -5  -7   1   18.70    2.80
  -5  -7   1   12.50    3.70
   4   7  -1   64.89    5.30
   4   7  -1   63.59    6.90
   4   7  -1   77.29    4.70
   4   7  -1   70.79    4.30
   4   7  -1   80.49    5.70
  -4  -7   1   70.39    4.00
  -4  -7   1   81.09    6.40
  -4  -7   1   69.19    4.10
   3   7  -1  572.34   19.30
   3   7  -1  541.25   18.10
   3   7  -1  567.54   19.00
  -3  -7   1  544.95   18.90
  -3  -7   1  544.95   18.30
  -3  -7   1  576.44   18.20
   2   7  -1   78.79    4.40
   2   7  -1   88.39    4.90
   2   7  -1   80.39    5.00
   2   7  -1   78.19    4.10
   2   7  -1   76.49    5.00
   2   7  -1   76.69    4.20
   2   7  -1   77.79    4.00
  -2  -7   1   72.69    3.90
  -2  -7   1   79.19    3.80
  -2  -7   1   78.39    4.40
   1   7  -1  186.68    6.80
   1   7  -1  181.18    7.90
   1   7  -1  174.98    7.10
   1   7  -1  174.58    6.70
   1   7  -1  177.18    7.40
   1   7  -1  178.78    7.00
   1   7  -1  185.98    6.50
   1   7  -1  178.98    7.20
  -1  -7   1  181.98    6.70
  -1  -7   1  182.98    7.20
  -1  -7   1  183.88    6.70
  -1  -7   1  189.18    8.00
  -1  -7   1  176.48    7.10
   0   7  -1  305.17    9.90
   0   7  -1  284.87   10.40
   0   7  -1  293.47   10.60
   0   7  -1  288.07   10.30
   0   7  -1  289.87   10.90
   0   7  -1  285.57   10.30
   0   7  -1  293.67   10.40
   0   7  -1  308.57   10.00
   0  -7   1  286.77   11.10
   0  -7   1  288.87   10.70
   0  -7   1  303.07   10.10
   0  -7   1  303.07   10.10
   0  -7   1  289.37   10.60
  -1   7  -1  519.65   15.90
  -1   7  -1  497.35   16.00
  -1   7  -1  480.85   16.30
  -1   7  -1  465.15   16.20
  -1   7  -1  452.35   16.70
  -1   7  -1  482.25   16.30
  -1   7  -1  513.95   16.60
  -1   7  -1  469.65   16.50
   1  -7   1  486.55   16.00
   1  -7   1  490.85   16.50
   1  -7   1  474.85   16.10
  -2   7  -1   50.29    4.00
  -2   7  -1   47.70    2.60
  -2   7  -1   53.59    3.00
  -2   7  -1   46.20    2.80
  -2   7  -1   45.80    3.40
  -2   7  -1   41.60    3.80
  -2   7  -1   55.99    3.80
   2  -7   1   49.80    3.50
   2  -7   1   53.09    4.50
   2  -7   1   45.50    3.50
   2  -7   1   51.09    6.40
   2  -7   1   45.00    3.20
   2  -7   1   48.00    6.20
   2  -7   1   46.20    3.80
  -3   7  -1  113.99    5.00
  -3   7  -1  113.49    4.80
  -3   7  -1  109.69    6.10
  -3   7  -1  116.39    4.60
  -3   7  -1  111.89    5.60
  -3   7  -1  121.19    5.30
   3  -7   1  110.69    6.90
   3  -7   1  108.79    7.40
   3  -7   1  106.79    8.40
   3  -7   1  115.99    6.10
   3  -7   1  105.19    7.00
  -4   7  -1  101.89    6.80
  -4   7  -1   93.29    5.80
  -4   7  -1  117.89    5.40
  -4   7  -1  109.99    5.20
  -4   7  -1  111.09    5.00
  -4   7  -1  112.89    5.90
  -4   7  -1  107.09    5.70
   4  -7   1  119.49    7.30
   4  -7   1  107.49    8.50
   4  -7   1  111.09    6.60
  -5   7  -1  174.28    7.80
  -5   7  -1  171.98    8.30
  -5   7  -1  174.58    7.10
  -5   7  -1  186.78    8.20
  -5   7  -1  181.78    7.10
   5  -7   1  178.98    9.20
   5  -7   1  171.18    9.60
   5  -7   1  169.78    8.40
  -6   7  -1    1.60    2.50
  -6   7  -1    2.10    3.10
  -6   7  -1    4.00    2.80
  -6   7  -1    3.80    1.30
   6  -7   1    3.00    3.10
   6  -7   1    6.80    3.40
   6  -7   1    5.70    2.50
  -7   7  -1   10.70    2.40
  -7   7  -1    8.70    1.70
   7  -7   1   11.90    2.20
   7   6  -1   42.40    4.10
   7   6  -1   37.60    2.50
   7   6  -1   34.30    2.40
   6   6  -1   26.10    3.60
   6   6  -1   16.90    3.90
   6   6  -1   17.60    3.30
  -6  -6   1   21.70    3.50
   5   6  -1   98.79    5.40
   5   6  -1  101.99    5.40
   5   6  -1   98.69    6.90
   5   6  -1   97.89    6.50
  -5  -6   1   98.79    4.60
  -5  -6   1  112.59    8.00
   4   6  -1   32.50    4.70
   4   6  -1   34.00    5.80
   4   6  -1   24.70    3.40
   4   6  -1   26.30    4.60
   4   6  -1   27.80    3.00
  -4  -6   1   27.40    4.40
  -4  -6   1   28.00    2.50
   3   6  -1  149.69    6.10
   3   6  -1  143.29    6.00
   3   6  -1  145.59    6.00
   3   6  -1  146.39    7.10
   3   6  -1  154.18    6.20
   3   6  -1  155.38    7.00
  -3  -6   1  152.38    5.50
  -3  -6   1  142.69    5.50
  -3  -6   1  144.09    6.30
  -3  -6   1  147.69    5.80
   2   6  -1   29.70    2.40
   2   6  -1   32.00    2.70
   2   6  -1   31.90    3.10
   2   6  -1   32.50    3.70
   2   6  -1   36.10    3.90
   2   6  -1   33.70    2.30
  -2  -6   1   31.10    1.90
  -2  -6   1   28.00    2.90
  -2  -6   1   35.70    2.60
  -2  -6   1   30.20    2.00
  -2  -6   1   33.80    2.10
  -2  -6   1   25.70    2.90
   1   6  -1    5.70    1.30
   1   6  -1    7.70    1.30
   1   6  -1    7.00    1.10
   1   6  -1    6.50    1.10
  -1  -6   1    7.10    1.70
  -1  -6   1    6.50    1.10
  -1  -6   1    6.40    1.70
  -1  -6   1    8.50    1.80
  -1  -6   1    6.30    1.10
   0   6  -1 1750.32   54.99
   0   6  -1 1768.42   55.09
   0   6  -1 1746.93   55.19
   0   6  -1 1745.73   55.09
   0  -6   1 1776.72   55.09
   0  -6   1 1717.43   55.39
   0  -6   1 1819.92   55.59
  -1   6  -1  748.43   23.40
  -1   6  -1  687.13   22.90
  -1   6  -1  720.83   23.10
  -1   6  -1  719.03   23.30
  -1   6  -1  709.73   23.20
  -1   6  -1  716.23   23.00
  -1   6  -1  720.03   23.00
   1  -6   1  716.53   23.10
   1  -6   1  736.53   23.50
   1  -6   1  742.33   23.10
   1  -6   1  720.43   23.70
   1  -6   1  721.13   23.70
  -2   6  -1  396.06   13.70
  -2   6  -1  394.06   13.00
  -2   6  -1  404.06   13.20
  -2   6  -1  385.06   13.00
  -2   6  -1  397.76   13.30
   2  -6   1  379.66   13.80
   2  -6   1  395.06   13.40
   2  -6   1  405.26   13.60
   2  -6   1  408.36   13.40
  -3   6  -1   47.20    3.10
  -3   6  -1   47.40    2.80
  -3   6  -1   49.90    4.20
  -3   6  -1   48.90    3.90
  -3   6  -1   45.90    5.20
  -3   6  -1   48.10    2.90
  -3   6  -1   50.59    2.70
   3  -6   1   48.50    5.40
   3  -6   1   46.10    4.80
   3  -6   1   57.59    3.30
   3  -6   1   42.30    3.70
   3  -6   1   55.79    3.90
   3  -6   1   49.70    7.00
  -4   6  -1   54.39    3.50
  -4   6  -1   56.39    4.00
  -4   6  -1   52.49    3.40
  -4   6  -1   52.39    3.80
   4  -6   1   68.39    6.20
   4  -6   1   64.69    6.20
  -5   6  -1   68.69    3.90
  -5   6  -1   75.29    4.90
  -5   6  -1   75.49    6.00
  -5   6  -1   73.09    4.20
   5  -6   1   68.49    5.20
   5  -6   1   66.79    6.20
   5  -6   1   67.39    6.30
  -6   6  -1   17.00    4.20
  -6   6  -1   19.60    3.10
  -6   6  -1   21.70    2.80
  -6   6  -1   18.80    3.60
  -6   6  -1   25.70    4.40
   6  -6   1   22.80    3.90
   6  -6   1   21.10    3.60
   6  -6   1   15.00    3.70
   6  -6   1   11.50    4.80
  -7   6  -1  236.38    9.10
  -7   6  -1  238.08    8.40
  -7   6  -1  212.88   10.30
   7  -6   1  240.18    8.50
   7  -6   1  244.58    9.90
  -8   6  -1    9.60    1.60
   8  -6   1    6.30    1.60
   8  -6   1    2.00    2.80
   8   5  -1   21.60    2.50
   8   5  -1   22.90    2.80
   8   5  -1   22.20    1.90
   7   5  -1  144.29    6.80
   7   5  -1  149.39    6.00
   7   5  -1  156.48    6.00
  -7  -5   1  134.79    6.40
   6   5  -1   25.50    4.80
   6   5  -1   37.90    5.30
   6   5  -1   29.30    3.50
   6   5  -1   30.80    3.80
  -6  -5   1   24.80    3.50
   5   5  -1  194.28    7.80
   5   5  -1  183.38    8.90
   5   5  -1  188.58    7.90
   5   5  -1  183.28    8.80
  -5  -5   1  190.38    9.40
   4   5  -1   58.19    4.10
   4   5  -1   57.39    3.60
   4   5  -1   47.20    5.70
   4   5  -1   55.79    5.00
  -4  -5   1   57.19    3.00
  -4  -5   1   60.59    4.60
   3   5  -1  349.37   12.80
   3   5  -1  356.36   12.70
   3   5  -1  365.26   12.50
   3   5  -1  368.76   13.20
   3   5  -1  384.26   12.60
  -3  -5   1  368.16   11.90
  -3  -5   1  372.56   12.30
  -3  -5   1  353.56   11.80
   2   5  -1  227.68    7.70
   2   5  -1  237.68    8.30
   2   5  -1  229.38    7.70
  -2  -5   1  239.28    7.80
  -2  -5   1  240.88    7.80
  -2  -5   1  242.58    8.10
  -2  -5   1  236.28    8.30
   1   5  -1   74.59    3.00
   1   5  -1   77.99    3.30
   1   5  -1   75.09    2.90
   1   5  -1   76.59    2.90
  -1  -5   1   70.39    3.00
  -1  -5   1   76.89    3.40
  -1  -5   1   76.39    2.90
  -1  -5   1   76.49    3.30
   0   5  -1   19.90    1.40
   0   5  -1   20.20    1.40
   0   5  -1   19.30    1.50
   0   5  -1   20.40    1.30
   0   5  -1   19.30    1.70
   0  -5   1   22.20    1.80
   0  -5   1   20.40    1.90
   0  -5   1   20.10    1.40
   0  -5   1   21.60    1.60
  -1   5  -1  252.27    8.70
  -1   5  -1  244.88    8.40
  -1   5  -1  248.38    8.40
  -1   5  -1  256.47    8.50
  -1   5  -1  249.97    8.50
   1  -5   1  277.57    8.80
   1  -5   1  240.78    8.50
   1  -5   1  251.87    8.90
   1  -5   1  252.47    8.50
  -2   5  -1   94.39    3.90
  -2   5  -1   94.59    4.00
  -2   5  -1   96.79    3.90
  -2   5  -1  102.09    3.90
  -2   5  -1   81.19    4.30
   2  -5   1   98.99    4.00
   2  -5   1   87.29    4.90
   2  -5   1   97.79    3.90
  -3   5  -1  111.49    4.60
  -3   5  -1  112.09    4.40
  -3   5  -1  110.79    5.30
  -3   5  -1  109.59    4.40
  -3   5  -1  106.49    5.00
  -3   5  -1  114.39    4.80
   3  -5   1   97.79    8.00
   3  -5   1  106.09    7.60
   3  -5   1  115.39    6.10
   3  -5   1   97.49    7.20
   3  -5   1  114.99    4.90
   3  -5   1  106.99    4.90
   3  -5   1  111.59    4.80
  -4   5  -1   81.99    4.50
  -4   5  -1   84.09    4.40
  -4   5  -1   83.49    3.90
  -4   5  -1   81.59    3.90
   4  -5   1   69.39    5.70
   4  -5   1   75.99    6.00
   4  -5   1   93.79    7.60
   4  -5   1   59.19    8.40
   4  -5   1   80.29    6.40
  -5   5  -1   32.20    4.20
  -5   5  -1   39.10    3.40
  -5   5  -1   37.90    4.00
  -5   5  -1   33.80    4.30
   5  -5   1   37.90    5.20
   5  -5   1   45.40    5.40
   5  -5   1   34.70    5.10
   5  -5   1   35.30    4.00
  -6   5  -1    2.10    3.80
  -6   5  -1   -1.70    1.80
  -6   5  -1    0.90    2.90
  -6   5  -1    0.00    2.90
   6  -5   1    1.70    3.20
   6  -5   1   -3.70    2.90
   6  -5   1    4.40    3.40
  -7   5  -1    7.40    3.00
  -7   5  -1    4.40    1.60
  -7   5  -1    3.80    2.70
   7  -5   1    5.70    2.10
   7  -5   1    6.70    2.10
   7  -5   1    4.80    1.50
  -8   5  -1    3.40    1.50
   8  -5   1    2.20    3.50
   8  -5   1    1.20    1.50
   8   4  -1    3.90    2.60
   8   4  -1   -0.40    1.30
   8   4  -1    0.10    2.10
   7   4  -1  161.38    7.00
   7   4  -1  163.88    6.60
   7   4  -1  169.68    7.50
   6   4  -1  108.19    5.60
   6   4  -1  105.29    5.60
   6   4  -1  106.09    6.60
  -6  -4   1   99.79    4.90
   5   4  -1  126.39    6.20
   5   4  -1  135.59    5.90
   5   4  -1  126.69    7.10
  -5  -4   1  125.89    5.10
  -5  -4   1  127.89    7.60
   4   4  -1  190.18    7.60
   4   4  -1  191.78    7.70
   4   4  -1  184.88    8.60
   4   4  -1  180.08    8.50
   4   4  -1  185.08    7.30
  -4  -4   1  187.08    6.40
  -4  -4   1  198.18    7.80
  -3  -4   1 1408.36   43.90
  -3  -4   1 1360.96   43.90
  -3  -4   1 1363.66   43.90
  -3  -4   1 1470.85   44.40
  -3  -4   1 1451.35   44.10
   2   4  -1 1126.09   35.90
  -2  -4   1 1150.28   35.90
  -2  -4   1 1145.99   35.50
  -2  -4   1 1131.19   35.60
  -2  -4   1 1118.19   35.40
  -2  -4   1 1158.38   35.60
   1   4  -1   59.99    2.40
   1   4  -1   64.99    2.50
   1   4  -1   65.69    2.70
   1   4  -1   64.29    2.40
  -1  -4   1   62.09    2.60
  -1  -4   1   64.89    2.40
  -1  -4   1   63.59    2.80
  -1  -4   1   60.49    2.40
   0   4  -1 2272.97   69.59
   0   4  -1 2176.08   69.39
   0   4  -1 2322.57   69.59
   0  -4   1 2281.07   69.69
   0  -4   1 2242.58   69.69
   0  -4   1 2150.38   69.49
   0  -4   1 2210.58   69.39
  -1   4  -1  425.96   13.60
  -1   4  -1  422.46   13.20
  -1   4  -1  405.26   13.40
  -1   4  -1  417.56   13.50
  -1   4  -1  422.26   13.40
  -1   4  -1  418.96   13.50
   1  -4   1  421.46   13.50
   1  -4   1  421.76   13.60
   1  -4   1  414.26   13.40
   1  -4   1  420.16   13.70
   1  -4   1  405.56   13.40
  -2   4  -1  715.03   22.60
  -2   4  -1  737.63   22.40
  -2   4  -1  699.83   22.60
  -2   4  -1  705.53   22.60
  -2   4  -1  696.23   22.30
   2  -4   1  654.43   22.30
   2  -4   1  713.53   22.70
   2  -4   1  705.53   22.50
   2  -4   1  708.43   22.40
  -3   4  -1   68.09    3.30
  -3   4  -1   68.19    3.10
  -3   4  -1   64.19    2.90
  -3   4  -1   68.09    3.50
  -3   4  -1   66.99    3.60
  -3   4  -1   65.89    3.30
   3  -4   1   65.89    3.10
   3  -4   1   61.89    4.10
   3  -4   1   64.99    3.30
   3  -4   1   69.89    3.10
  -4   4  -1 1026.90   33.20
  -4   4  -1 1042.60   32.40
  -4   4  -1 1058.09   33.20
  -4   4  -1 1056.79   32.40
   4  -4   1 1000.00   33.90
   4  -4   1 1012.20   33.60
   4  -4   1 1007.20   34.10
   4  -4   1 1043.20   34.50
   4  -4   1 1013.90   33.30
   4  -4   1 1040.10   33.10
   4  -4   1  914.81   32.60
  -5   4  -1   -0.60    2.00
  -5   4  -1    0.70    1.70
  -5   4  -1    0.60    2.20
  -5   4  -1    1.90    1.60
   5  -4   1    0.60    2.70
   5  -4   1    2.70    2.10
   5  -4   1    0.20    4.50
   5  -4   1   -1.20    3.40
  -6   4  -1   62.09    3.60
  -6   4  -1   61.59    3.80
  -6   4  -1   57.89    5.30
  -6   4  -1   70.49    6.30
  -6   4  -1   66.59    5.30
   6  -4   1   63.69    4.20
   6  -4   1   61.69    5.70
   6  -4   1   66.49    6.00
   6  -4   1   64.29    5.90
  -7   4  -1   10.80    2.50
  -7   4  -1    5.40    2.10
  -7   4  -1   11.10    4.00
   7  -4   1    4.30    2.30
   7  -4   1    9.10    6.60
  -8   4  -1    8.00    2.60
  -8   4  -1   14.20    2.60
   8  -4   1    7.20    1.60
   8  -4   1    3.10    2.50
   8   3  -1   29.10    3.30
   8   3  -1   23.90    2.40
   7   3  -1   11.70    2.40
   7   3  -1   12.60    3.50
  -7  -3   1   14.90    2.50
  -7  -3   1   13.90    2.70
   6   3  -1   84.19    5.10
   6   3  -1   99.29    5.60
   6   3  -1   82.69    6.00
  -6  -3   1   88.19    4.40
   5   3  -1   25.70    3.90
   5   3  -1   26.40    4.60
  -5  -3   1   22.50    4.60
  -5  -3   1   23.10    2.50
   4   3  -1    5.20    2.00
   4   3  -1    4.30    2.50
   4   3  -1    1.50    2.70
  -4  -3   1    3.20    1.60
   3   3  -1  506.85   16.30
  -3  -3   1  484.75   15.60
  -3  -3   1  488.75   15.90
  -3  -3   1  515.05   15.60
  -3  -3   1  496.85   15.90
   2   3  -1    3.90    0.80
   2   3  -1    4.20    0.40
   2   3  -1    4.00    0.40
  -2  -3   1    3.60    0.50
  -2  -3   1    5.70    1.00
  -2  -3   1    4.50    0.70
  -2  -3   1    3.80    0.60
   1   3  -1   87.09    2.90
   1   3  -1   79.69    3.00
   1   3  -1   88.79    3.20
   1   3  -1   89.89    3.30
   1   3  -1   82.29    2.90
  -1  -3   1   83.19    3.20
  -1  -3   1   85.89    3.00
  -1  -3   1   83.69    2.90
   0  -3   1 2743.13   84.99
  -1   3  -1  541.55   17.60
  -1   3  -1  545.95   17.60
  -1   3  -1  556.84   17.80
  -1   3  -1  577.94   17.50
  -1   3  -1  569.84   17.80
  -1   3  -1  544.75   17.70
   1  -3   1  568.24   17.70
   1  -3   1  565.34   17.80
   1  -3   1  541.35   17.70
   1  -3   1  542.15   17.80
   1  -3   1  596.94   17.70
  -2   3  -1  357.56   11.30
  -2   3  -1  340.07   11.60
  -2   3  -1  354.26   11.50
  -2   3  -1  351.56   11.50
  -2   3  -1  329.67   11.20
   2  -3   1  345.77   11.50
   2  -3   1  353.86   11.30
   2  -3   1  347.07   11.30
   2  -3   1  352.06   11.50
  -3   3  -1   83.79    3.80
  -3   3  -1   73.99    3.40
  -3   3  -1   76.39    3.30
  -3   3  -1   76.89    3.90
  -3   3  -1   71.49    3.70
   3  -3   1   76.79    3.10
   3  -3   1   80.89    3.40
   3  -3   1   73.99    3.70
   3  -3   1   74.49    3.30
  -4   3  -1  142.49    6.30
  -4   3  -1  141.99    6.00
  -4   3  -1  144.49    6.30
  -4   3  -1  148.09    5.50
  -4   3  -1  152.98    6.20
   4  -3   1  134.49    7.40
   4  -3   1  140.59    6.30
   4  -3   1  141.59    5.90
   4  -3   1  140.99    7.50
   4  -3   1  151.48    8.90
   4  -3   1  121.69    7.30
  -5   3  -1    2.70    1.50
  -5   3  -1   -3.70    3.60
  -5   3  -1    0.70    1.70
  -5   3  -1    5.60    2.20
   5  -3   1   -2.20    4.40
   5  -3   1   -0.50    2.90
   5  -3   1    3.60    3.00
   5  -3   1    3.10    2.50
  -6   3  -1   87.99    4.60
  -6   3  -1   85.49    4.40
  -6   3  -1   92.89    6.60
   6  -3   1   76.99    6.00
   6  -3   1   88.39    6.20
   6  -3   1   83.39    4.90
  -7   3  -1   81.69    3.90
  -7   3  -1   72.09    6.20
  -7   3  -1   70.29    4.10
   7  -3   1   83.69    5.30
   7  -3   1   63.69    6.20
   7  -3   1   74.69    5.80
  -8   3  -1   38.70    2.60
  -8   3  -1   40.40    4.60
   8  -3   1   37.70    3.20
   8  -3   1   34.90    3.00
   8   2  -1   24.10    3.50
   8   2  -1   19.80    2.40
  -8  -2   1   20.70    3.60
  -8  -2   1   20.40    3.60
   7   2  -1   19.70    3.60
   7   2  -1   13.10    2.20
   7   2  -1    4.20    3.50
  -7  -2   1   12.90    2.50
  -7  -2   1   16.00    2.40
   6   2  -1  131.99    7.20
   6   2  -1  125.99    6.80
   6   2  -1  139.29    6.40
  -6  -2   1  137.29    5.70
   5   2  -1  204.78    8.90
   5   2  -1  191.48    8.20
   5   2  -1  200.58    8.50
   5   2  -1  194.88    8.20
  -5  -2   1  199.38    7.00
  -5  -2   1  194.38    8.20
   4   2  -1  668.13   22.70
   4   2  -1  688.53   22.20
  -4  -2   1  652.53   22.60
  -4  -2   1  674.33   21.10
  -3  -2   1    5.80    0.90
  -3  -2   1    6.70    0.90
  -3  -2   1    6.70    0.70
  -3  -2   1    6.00    0.50
   2   2  -1 1257.67   39.00
  -2  -2   1 1233.48   38.80
   1   2  -1  247.38    8.00
   1   2  -1  238.38    7.70
   1   2  -1  247.58    8.00
  -1  -2   1  252.87    7.80
  -1  -2   1  248.08    7.70
   0   2  -1   34.30    1.20
   0   2  -1   35.60    1.20
   0   2  -1   29.00    1.10
   0   2  -1   31.70    1.30
   0   2  -1   31.30    1.30
   0   2  -1   31.50    1.20
   0  -2   1   30.10    1.50
   0  -2   1   30.20    1.40
   0  -2   1   30.40    1.20
   0  -2   1   30.90    1.20
   0  -2   1   28.10    1.30
   0  -2   1   30.70    1.30
  -1   2  -1 9999.00  309.87
   1  -2   1 9616.24  309.57
  -2   2  -1 4326.57  142.59
   2  -2   1 4216.28  141.89
  -3   2  -1 1635.24   51.49
  -3   2  -1 1595.14   51.79
  -3   2  -1 1619.74   51.29
  -3   2  -1 1778.72   51.49
   3  -2   1 1630.44   51.19
   3  -2   1 1592.54   51.09
   3  -2   1 1640.84   51.39
   3  -2   1 1643.94   51.59
  -4   2  -1   58.09    2.80
  -4   2  -1   57.49    3.60
  -4   2  -1   54.99    3.90
  -4   2  -1   63.59    3.30
  -4   2  -1   54.99    3.10
   4  -2   1   52.89    4.60
   4  -2   1   52.19    3.30
   4  -2   1   47.40    4.80
   4  -2   1   55.89    5.20
   4  -2   1   55.99    4.10
  -5   2  -1   34.40    4.80
  -5   2  -1   30.90    4.40
  -5   2  -1   33.00    2.90
  -5   2  -1   33.40    2.90
   5  -2   1   34.70    3.90
   5  -2   1   23.70    4.60
   5  -2   1   32.10    5.50
   5  -2   1   30.20    4.50
   5  -2   1   28.40    4.70
  -6   2  -1    3.50    1.60
  -6   2  -1    3.90    1.90
  -6   2  -1    7.20    3.50
   6  -2   1    0.20    2.30
   6  -2   1    4.30    2.10
   6  -2   1    2.60    2.70
   6  -2   1    4.80    3.20
  -7   2  -1  130.49    5.60
  -7   2  -1  133.59    5.80
  -7   2  -1  115.69    7.50
   7  -2   1  127.49    6.40
   7  -2   1  122.29    6.80
   7  -2   1  118.19    7.10
  -8   2  -1   25.00    4.40
  -8   2  -1   27.70    2.70
   8  -2   1   33.70    2.80
   8  -2   1   22.80    2.70
   8   1  -1    8.90    2.10
   8   1  -1    5.50    1.40
  -8  -1   1   11.40    2.70
  -8  -1   1    4.50    2.70
   7   1  -1   73.09    4.90
   7   1  -1   72.39    4.60
   7   1  -1   74.49    5.30
  -7  -1   1   76.49    4.40
  -7  -1   1   56.29    9.10
  -7  -1   1   70.89    4.40
   6   1  -1    8.40    2.20
   6   1  -1    8.90    3.10
   6   1  -1    9.70    3.20
   6   1  -1   10.30    3.60
  -6  -1   1    8.60    1.90
  -6  -1   1    8.90    2.70
   5   1  -1   27.50    5.10
   5   1  -1   26.80    4.20
   5   1  -1   17.30    3.20
   5   1  -1   20.60    4.00
  -5  -1   1   24.70    3.80
  -5  -1   1   20.20    2.40
   4   1  -1   32.60    2.60
   4   1  -1   33.70    4.10
  -4  -1   1   29.70    1.90
  -4  -1   1   32.60    1.70
  -4  -1   1   34.60    1.50
  -4  -1   1   33.00    2.70
   3   1  -1   25.00    0.90
   3   1  -1   25.80    0.90
   3   1  -1   25.30    1.60
  -3  -1   1   25.00    1.30
  -3  -1   1   26.10    1.10
  -3  -1   1   26.40    1.70
   2   1  -1   26.40    1.40
   2   1  -1   27.60    0.90
   2   1  -1   28.00    0.90
   2   1  -1   26.00    1.40
  -2  -1   1   27.70    1.10
  -2  -1   1   28.60    1.00
  -2  -1   1   25.40    1.20
   1   1  -1  319.27   10.30
  -1  -1   1  326.27   10.20
  -1  -1   1  321.87   10.40
   0   1  -1   87.29    2.90
   0   1  -1   92.69    3.00
   0   1  -1   91.09    3.10
   0   1  -1   93.19    3.00
   0   1  -1   89.69    3.00
   0  -1   1  105.79    3.00
   0  -1   1   93.59    3.30
   0  -1   1   88.09    3.00
   0  -1   1   93.39    3.00
   0  -1   1   90.09    3.00
   0  -1   1   92.49    3.00
  -1   1  -1 7803.52  244.78
   1  -1   1 7722.43  244.88
  -2   1  -1 3259.87  103.59
   2  -1   1 3435.66  103.79
  -3   1  -1  252.07    8.20
  -3   1  -1  249.08    8.50
  -3   1  -1  265.57    8.90
  -3   1  -1  236.58    8.20
   3  -1   1  248.68    8.60
   3  -1   1  253.77    8.40
   3  -1   1  243.88    8.20
   3  -1   1  251.07    8.40
  -4   1  -1  199.08    7.30
  -4   1  -1  184.28    6.90
  -4   1  -1  195.88    6.80
  -4   1  -1  197.88    6.90
  -4   1  -1  201.38    7.80
   4  -1   1  211.78    7.50
   4  -1   1  187.08    8.30
   4  -1   1  190.28    8.80
   4  -1   1  201.38    7.20
   4  -1   1  181.58    9.00
  -5   1  -1  222.28    8.00
  -5   1  -1  227.38    7.90
  -5   1  -1  225.58    9.50
   5  -1   1  224.68    9.80
   5  -1   1  207.68   12.00
   5  -1   1  220.88    8.40
   5  -1   1  207.58    9.30
  -6   1  -1   16.90    2.40
  -6   1  -1   10.50    3.90
  -6   1  -1   16.70    3.00
   6  -1   1   11.10    3.30
   6  -1   1   15.40    3.50
   6  -1   1   17.20    2.50
   6  -1   1   13.20    2.90
   6  -1   1   18.80    2.90
  -7   1  -1   36.40    3.60
  -7   1  -1   34.60    2.90
   7  -1   1   34.60    4.10
   7  -1   1   38.10    4.60
  -8   1  -1   12.00    2.50
  -8   1  -1   16.60    2.50
  -8   1  -1   10.10    2.80
   8  -1   1   12.40    2.70
   8  -1   1   10.90    1.70
   8   0  -1   37.70    3.50
   8   0  -1   36.20    2.80
  -8   0   1   28.90    4.20
  -8   0   1   39.90    3.30
   7   0  -1   64.29    4.80
   7   0  -1   60.59    4.40
  -7   0   1   55.09    4.10
  -7   0   1   51.09    8.80
  -7   0   1   60.09    3.70
   6   0  -1   52.49    4.30
   6   0  -1   53.09    5.00
   6   0  -1   50.79    5.70
   6   0  -1   44.40    5.10
  -6   0   1   40.40    4.10
  -6   0   1   46.80    3.40
  -6   0   1   49.70    5.60
   5   0  -1   41.50    5.00
   5   0  -1   55.69    4.30
   5   0  -1   46.90    6.80
   5   0  -1   45.30    6.80
   5   0  -1   60.09    5.70
   5   0  -1   49.80    4.60
  -5   0   1   54.99    3.00
  -5   0   1   56.89    4.90
  -5   0   1   49.99    3.90
   4   0  -1   37.70    2.40
   4   0  -1   37.90    1.70
   4   0  -1   35.60    1.60
  -4   0   1   32.90    2.60
  -4   0   1   40.90    1.90
  -4   0   1   37.30    2.10
   3   0  -1  741.43   23.70
   3   0  -1  787.92   24.00
  -3   0   1  717.43   23.60
  -3   0   1  804.52   23.70
  -3   0   1  764.52   23.80
  -3   0   1  728.53   24.00
   2   0  -1  318.67   10.10
   2   0  -1  307.67    9.90
  -2   0   1  304.07   10.10
  -2   0   1  323.17   10.00
  -2   0   1  313.67    9.90
  -2   0   1  317.37   10.10
   1   0  -1  123.29    4.00
   1   0  -1  124.49    4.00
   1   0  -1  128.69    4.00
  -1   0   1  124.09    4.10
  -1   0   1  118.99    3.90
  -1   0   1  121.09    4.10
  -1   0   1  124.59    3.90
  -1   0   1  124.69    4.00
   0   0  -1  101.99    3.20
   0   0  -1   99.89    3.20
   0   0  -1   99.79    3.20
   0   0  -1   98.69    3.20
   0   0  -1  100.49    3.20
   0   0   1  104.09    3.20
   0   0   1  100.19    3.30
   0   0   1   98.79    3.20
   0   0   1   99.49    3.30
   0   0   1  100.79    3.20
   0   0   1   91.39    3.20
  -1   0  -1    9.90    0.70
  -1   0  -1    8.90    0.90
  -1   0  -1    9.60    0.60
   1   0   1   10.40    0.70
   1   0   1   10.10    0.60
   1   0   1    9.40    0.80
   1   0   1   10.20    0.40
   1   0   1   10.10    0.60
  -2   0  -1   86.39    2.80
  -2   0  -1   80.59    3.30
  -2   0  -1   83.89    3.00
   2   0   1   73.29    3.20
   2   0   1   86.79    2.90
   2   0   1   84.19    2.90
   2   0   1   82.29    2.90
  -3   0  -1   58.69    2.60
  -3   0  -1   66.89    2.50
  -3   0  -1   66.09    2.90
  -3   0  -1   67.59    3.10
   3   0   1   66.29    2.70
   3   0   1   68.59    2.60
   3   0   1   64.29    2.90
   3   0   1   64.69    2.50
  -4   0  -1  145.69    5.60
  -4   0  -1  147.49    5.30
  -4   0  -1  152.28    5.30
  -4   0  -1  152.08    5.70
   4   0   1  150.28    5.60
   4   0   1  140.29    7.10
   4   0   1  148.59    5.50
   4   0   1  144.29    7.40
  -5   0  -1  120.29    6.70
  -5   0  -1  141.89    5.30
  -5   0  -1  132.89    7.20
  -5   0  -1  131.69    5.50
   5   0   1  136.59    7.00
   5   0   1  136.19    5.80
   5   0   1  135.99    6.40
   5   0   1  143.29    6.90
  -6   0  -1   89.99    4.70
  -6   0  -1   94.99    4.30
   6   0   1   93.49    5.80
   6   0   1   88.39    6.00
   6   0   1   95.19    5.70
   6   0   1   94.19    6.30
  -7   0  -1   30.50    3.30
  -7   0  -1   34.90    3.60
   7   0   1   30.90    5.20
   7   0   1   31.60    3.90
  -8   0  -1    4.80    2.70
   8   0   1    1.90    0.90
   8   0   1    0.00    2.50
   8  -1  -1   15.10    2.50
   8  -1  -1   24.90    2.70
  -8   1   1   22.30    2.80
  -8   1   1   22.80    4.10
   7  -1  -1  113.19    5.80
   7  -1  -1  104.79    6.70
   7  -1  -1  112.49    7.20
  -7   1   1  100.29    5.00
  -7   1   1  100.09    5.10
   6  -1  -1   34.20    4.90
   6  -1  -1   35.50    4.20
   6  -1  -1   33.90    4.90
   6  -1  -1   34.20    5.20
  -6   1   1   34.70    2.80
  -6   1   1   40.00    3.90
  -6   1   1   30.40    5.20
   5  -1  -1   54.69    6.50
   5  -1  -1   52.09    5.10
   5  -1  -1   48.00    4.70
   5  -1  -1   52.99    5.30
   5  -1  -1   46.90    4.30
  -5   1   1   49.40    4.10
  -5   1   1   49.70    5.50
  -5   1   1   49.90    3.00
  -5   1   1   40.20    3.70
   4  -1  -1   16.90    2.10
   4  -1  -1   12.50    1.50
  -4   1   1   15.80    1.70
  -4   1   1   12.20    1.90
  -4   1   1   18.30    2.40
  -4   1   1   14.90    1.50
  -4   1   1   15.10    1.80
   3  -1  -1   92.79    3.60
   3  -1  -1   94.89    3.30
   3  -1  -1   95.59    3.70
  -3   1   1   92.39    3.60
  -3   1   1   97.99    3.40
  -3   1   1   95.89    3.60
  -3   1   1   94.49    3.40
  -2   1   1 3141.49   97.29
   1  -1  -1  625.34   19.10
   1  -1  -1  626.54   19.20
   1  -1  -1  640.44   19.10
   1  -1  -1  601.54   19.00
   1  -1  -1  607.74   19.10
   1  -1  -1  585.54   19.00
  -1   1   1  581.34   19.20
  -1   1   1  626.04   19.10
  -1   1   1  619.74   19.10
  -1   1   1  611.84   19.10
  -1   1   1  598.64   19.20
   0  -1  -1 1912.71   62.89
   0   1   1 1888.81   62.79
  -1  -1  -1  703.23   21.30
  -1  -1  -1  706.93   21.40
   1   1   1  653.73   21.30
   1   1   1  678.73   21.40
   1   1   1  678.73   21.30
   1   1   1  671.83   21.40
   1   1   1  690.93   21.50
   1   1   1  693.43   21.30
  -2  -1  -1  169.08    5.50
  -2  -1  -1  153.88    5.40
  -2  -1  -1  163.48    5.30
  -2  -1  -1  169.18    5.90
   2   1   1  160.58    5.30
   2   1   1  160.98    5.30
   2   1   1  163.38    5.30
   2   1   1  165.18    5.60
  -3  -1  -1   94.99    3.60
  -3  -1  -1   99.59    3.50
  -3  -1  -1   99.79    3.80
  -3  -1  -1  101.89    4.20
   3   1   1   98.59    3.50
   3   1   1   98.99    3.60
  -4  -1  -1  673.23   20.70
  -4  -1  -1  658.83   20.90
  -4  -1  -1  653.73   20.60
  -4  -1  -1  637.24   20.70
  -4  -1  -1  687.03   21.70
   4   1   1  650.53   22.00
   4   1   1  645.44   20.50
   4   1   1  605.84   21.10
   4   1   1  620.34   22.00
   4   1   1  637.94   21.60
  -5  -1  -1   37.60    4.40
  -5  -1  -1   45.50    3.00
  -5  -1  -1   39.90    3.40
   5   1   1   43.90    4.50
   5   1   1   38.70    3.70
   5   1   1   41.80    5.70
  -6  -1  -1    3.50    1.60
  -6  -1  -1    2.50    2.00
   6   1   1   -0.90    2.70
   6   1   1   -0.30    3.20
   6   1   1    2.30    2.50
   6   1   1    1.30    2.20
  -7  -1  -1  187.38    7.50
  -7  -1  -1  179.78    7.00
   7   1   1  196.08    8.00
   7   1   1  189.48    8.90
  -8  -1  -1   44.40    3.40
  -8  -1  -1   47.40    4.50
   8   1   1   50.69    4.20
   8   1   1   44.40    2.70
   8  -2  -1   13.40    2.80
   8  -2  -1    7.40    1.70
  -8   2   1   12.60    2.90
  -8   2   1    6.70    1.80
   7  -2  -1   46.10    4.30
   7  -2  -1   50.59    5.20
   7  -2  -1   53.59    5.30
  -7   2   1   45.00    3.80
  -7   2   1   36.40    5.90
  -7   2   1   49.20    3.70
   6  -2  -1   65.19    5.60
   6  -2  -1   52.49    5.20
   6  -2  -1   48.80    4.30
   6  -2  -1   50.79    7.20
   6  -2  -1   56.99    4.70
   6  -2  -1   50.39    5.50
  -6   2   1   46.90    3.80
  -6   2   1   56.79    3.20
   5  -2  -1   21.30    4.00
   5  -2  -1   26.20    4.50
   5  -2  -1   25.50    3.10
   5  -2  -1   21.90    3.30
   5  -2  -1   24.10    3.80
  -5   2   1   21.10    3.00
  -5   2   1   27.70    2.40
  -5   2   1   20.40    3.40
  -5   2   1   28.40    4.30
   4  -2  -1 1119.59   35.70
   4  -2  -1 1120.09   35.80
   4  -2  -1 1089.69   36.90
  -4   2   1 1149.39   35.50
  -4   2   1 1162.88   35.40
  -4   2   1 1102.29   35.20
  -4   2   1 1151.98   36.10
  -4   2   1 1075.49   35.30
  -4   2   1 1103.19   35.40
   3  -2  -1    5.40    1.10
   3  -2  -1    4.30    1.10
   3  -2  -1    4.40    0.80
   3  -2  -1    4.40    1.10
  -3   2   1    2.80    1.00
  -3   2   1    4.50    0.70
  -3   2   1    4.20    0.90
  -3   2   1    4.60    1.10
  -3   2   1    3.50    0.90
   2  -2  -1    6.40    1.00
   2  -2  -1    6.20    0.90
   2  -2  -1    6.80    0.90
   2  -2  -1    7.40    0.80
  -2   2   1    6.90    0.90
  -2   2   1    6.50    0.80
  -2   2   1    7.60    1.20
  -2   2   1    6.10    1.20
   1  -2  -1  694.73   21.50
   1  -2  -1  703.13   21.50
   1  -2  -1  685.83   21.60
   1  -2  -1  702.43   21.60
  -1   2   1  667.43   21.60
  -1   2   1  677.43   21.60
  -1   2   1  683.23   21.50
  -1   2   1  703.03   21.50
  -1   2   1  653.63   21.50
   0   2   1 7837.22  248.58
   0   2   1 7859.01  249.08
  -1  -2  -1 3463.95  113.69
   1   2   1 3420.96  113.19
  -2  -2  -1  186.18    5.90
  -2  -2  -1  177.88    5.90
  -2  -2  -1  181.18    5.90
  -2  -2  -1  168.08    5.80
   2   2   1  175.78    5.80
   2   2   1  182.68    6.20
   2   2   1  176.98    5.80
   2   2   1  176.28    6.00
  -3  -2  -1   53.69    2.40
  -3  -2  -1   56.09    3.30
  -3  -2  -1   58.29    2.40
  -3  -2  -1   56.09    2.50
   3   2   1   56.99    2.30
   3   2   1   56.19    2.30
  -4  -2  -1  161.38    6.20
  -4  -2  -1  176.58    7.10
  -4  -2  -1  174.08    6.00
  -4  -2  -1  159.88    6.40
   4   2   1  169.88    7.30
   4   2   1  167.48    6.80
   4   2   1  169.28    7.60
   4   2   1  163.98    7.60
  -5  -2  -1  122.49    5.20
  -5  -2  -1  123.49    5.00
  -5  -2  -1  118.89    6.90
   5   2   1  102.09    6.80
   5   2   1  129.59    6.90
   5   2   1  125.39    6.30
   5   2   1  142.19    6.90
   5   2   1  121.69    5.90
  -6  -2  -1   45.30    3.60
  -6  -2  -1   46.40    3.20
   6   2   1   50.09    4.30
   6   2   1   48.80    5.40
   6   2   1   49.90    4.50
   6   2   1   43.00    4.90
  -7  -2  -1   46.60    3.80
  -7  -2  -1   39.50    2.90
   7   2   1   35.50    5.70
  -8  -2  -1    3.60    1.70
   8   2   1    4.60    1.10
   8   2   1    4.60    1.60
   8   2   1    4.20    4.10
   8  -3  -1  194.78    7.20
   8  -3  -1  183.38    7.70
  -8   3   1  176.48    6.90
  -8   3   1  186.08    7.40
   7  -3  -1    5.60    4.60
   7  -3  -1    3.00    2.20
   7  -3  -1    3.60    2.90
  -7   3   1    5.80    2.60
  -7   3   1    2.60    1.90
  -7   3   1    3.70    2.00
   6  -3  -1   54.29    5.70
   6  -3  -1   64.49    4.70
   6  -3  -1   72.79    5.80
   6  -3  -1   74.59    7.30
   6  -3  -1   61.99    6.90
  -6   3   1   64.49    5.60
  -6   3   1   69.09    5.30
  -6   3   1   65.59    4.00
  -6   3   1   63.39    3.70
   5  -3  -1   42.00    5.60
   5  -3  -1   39.90    4.90
   5  -3  -1   33.40    5.90
   5  -3  -1   38.20    4.30
  -5   3   1   43.20    3.90
  -5   3   1   42.00    3.80
  -5   3   1   37.50    3.10
  -5   3   1   36.80    2.80
   4  -3  -1   59.59    5.10
   4  -3  -1   55.69    5.50
   4  -3  -1   63.59    4.80
   4  -3  -1   58.99    5.80
   4  -3  -1   59.29    3.70
  -4   3   1   62.49    3.70
  -4   3   1   62.69    3.60
  -4   3   1   63.59    3.10
  -4   3   1   55.69    3.10
  -4   3   1   65.29    3.70
  -4   3   1   57.79    3.30
   3  -3  -1   68.79    3.20
   3  -3  -1   66.79    3.80
   3  -3  -1   72.49    3.30
   3  -3  -1   68.99    3.00
  -3   3   1   69.69    3.40
  -3   3   1   67.99    3.00
  -3   3   1   74.79    3.20
  -3   3   1   63.89    3.20
  -3   3   1   70.19    3.30
   2  -3  -1   50.99    2.20
   2  -3  -1   49.50    2.50
   2  -3  -1   50.69    2.40
   2  -3  -1   55.79    2.40
  -2   3   1   52.19    2.30
  -2   3   1   52.89    2.50
  -2   3   1   52.59    2.40
  -2   3   1   53.29    2.50
  -2   3   1   49.80    2.30
   1  -3  -1  361.16   11.50
   1  -3  -1  364.26   11.30
   1  -3  -1  360.86   11.30
   1  -3  -1  353.36   11.20
   1  -3  -1  331.07   11.40
   1  -3  -1  357.66   11.60
  -1   3   1  362.56   11.40
  -1   3   1  334.47   11.30
  -1   3   1  341.77   11.40
  -1   3   1  357.56   11.30
  -1   3   1  359.76   11.40
   0  -3  -1  614.34   19.40
   0  -3  -1  621.94   19.30
   0  -3  -1  595.64   19.20
   0  -3  -1  615.74   19.20
   0   3   1  583.94   19.20
   0   3   1  611.04   19.20
   0   3   1  604.04   19.20
   0   3   1  608.74   19.20
   0   3   1  627.44   19.20
   1   3   1 2693.83   92.89
  -2  -3  -1 1415.96   43.90
  -2  -3  -1 1382.46   43.90
  -2  -3  -1 1399.06   43.80
  -2  -3  -1 1382.46   44.00
   2   3   1 1441.56   43.80
   2   3   1 1421.66   44.20
   2   3   1 1406.06   43.80
  -3  -3  -1   14.10    1.40
  -3  -3  -1   10.60    1.70
  -3  -3  -1   12.00    1.40
  -3  -3  -1   13.80    1.40
  -3  -3  -1   14.70    2.10
  -4  -3  -1   14.10    2.40
  -4  -3  -1   11.20    1.90
  -4  -3  -1   11.90    1.90
  -4  -3  -1   10.20    1.90
   4   3   1   12.40    2.20
   4   3   1   16.40    3.10
   4   3   1   17.60    3.20
   4   3   1   19.70    2.70
   4   3   1   14.30    2.40
  -5  -3  -1  160.18    9.00
  -5  -3  -1  180.48    6.60
  -5  -3  -1  161.88    6.40
   5   3   1  175.48    7.50
   5   3   1  172.28    7.20
   5   3   1  178.38    8.10
   5   3   1  178.58    7.60
   5   3   1  140.69   10.00
  -6  -3  -1   44.10    7.60
  -6  -3  -1   38.00    3.10
   6   3   1   42.50    4.40
   6   3   1   39.90    5.30
   6   3   1   39.30    4.50
   6   3   1   41.10    4.00
  -7  -3  -1   22.80    3.20
   7   3   1   30.20    3.30
   7   3   1   22.50    2.60
   7   3   1   29.40    3.10
  -8  -3  -1   12.80    2.50
   8   3   1   11.90    2.30
   8   3   1   12.90    2.10
   8   3   1   14.40    1.60
   8  -4  -1   22.50    3.70
   8  -4  -1   23.90    3.00
  -8   4   1   23.60    3.80
  -8   4   1   25.70    2.40
   7  -4  -1  275.67   15.20
  -7   4   1  225.38   10.00
  -7   4   1  243.98   10.70
  -7   4   1  255.97    9.50
  -7   4   1  272.17    9.40
   6  -4  -1   43.80    7.00
   6  -4  -1   43.60    4.60
   6  -4  -1   56.19    7.00
   6  -4  -1   44.40    5.50
   6  -4  -1   36.60    5.30
  -6   4   1   43.80    3.80
  -6   4   1   51.39    3.70
  -6   4   1   51.79    5.20
  -6   4   1   38.80    4.70
   5  -4  -1   32.00    4.90
   5  -4  -1   21.30    4.40
   5  -4  -1   36.10    7.30
   5  -4  -1   29.10    4.80
  -5   4   1   21.60    2.70
  -5   4   1   22.20    3.70
  -5   4   1   27.60    3.60
  -5   4   1   20.80    2.90
   4  -4  -1  247.48   10.70
   4  -4  -1  247.08    9.80
   4  -4  -1  266.97    9.80
   4  -4  -1  258.47   10.80
   4  -4  -1  257.87   11.60
   4  -4  -1  248.88   11.20
  -4   4   1  215.58    9.70
  -4   4   1  263.77    9.50
  -4   4   1  259.37    9.00
  -4   4   1  273.47    9.00
  -4   4   1  276.57    9.70
   3  -4  -1  401.66   13.10
   3  -4  -1  409.26   13.50
   3  -4  -1  393.36   13.30
  -3   4   1  379.76   13.00
  -3   4   1  396.66   13.50
  -3   4   1  395.46   13.30
  -3   4   1  394.16   13.00
  -3   4   1  406.16   13.40
  -3   4   1  396.36   13.20
   2  -4  -1  689.23   21.50
   2  -4  -1  680.33   21.30
   2  -4  -1  600.04   21.10
   2  -4  -1  675.53   21.20
  -2   4   1  688.23   21.30
  -2   4   1  665.23   21.30
  -2   4   1  654.53   21.40
  -2   4   1  663.73   21.40
   1  -4  -1  187.78    6.70
   1  -4  -1  203.48    7.00
   1  -4  -1  198.88    6.60
   1  -4  -1  198.48    6.60
   1  -4  -1  202.38    7.10
   1  -4  -1  193.78    6.70
  -1   4   1  194.78    6.70
  -1   4   1  185.58    6.60
  -1   4   1  198.98    6.70
  -1   4   1  202.18    6.80
  -1   4   1  198.38    6.70
   0  -4  -1  481.75   15.80
   0  -4  -1  464.75   15.50
   0  -4  -1  491.15   15.50
   0  -4  -1  492.05   15.80
   0   4   1  488.45   15.60
   0   4   1  494.75   15.60
   0   4   1  490.45   15.60
   0   4   1  491.05   15.50
   0   4   1  487.05   15.50
  -1  -4  -1  651.73   20.10
  -1  -4  -1  625.54   20.10
  -1  -4  -1  624.34   20.40
  -1  -4  -1  648.24   20.30
   1   4   1  635.94   20.10
   1   4   1  632.54   20.10
   1   4   1  636.34   20.30
   1   4   1  629.74   20.20
  -2  -4  -1  168.58    6.30
  -2  -4  -1  179.18    6.10
  -2  -4  -1  173.88    6.00
  -2  -4  -1  175.98    6.20
   2   4   1  184.28    6.40
   2   4   1  178.48    6.00
  -3  -4  -1  104.89    4.20
  -3  -4  -1  109.99    4.00
  -3  -4  -1  107.39    5.10
  -3  -4  -1  107.29    4.30
  -3  -4  -1   96.39    4.30
  -3  -4  -1  102.89    4.20
   3   4   1  106.79    4.50
   3   4   1  101.69    4.10
   3   4   1  101.19    5.00
   3   4   1   99.99    4.80
   3   4   1  105.99    5.10
   3   4   1  103.19    6.90
  -4  -4  -1   67.29    5.30
  -4  -4  -1   63.69    3.30
   4   4   1   69.29    4.40
   4   4   1   59.99    5.40
   4   4   1   66.69    8.80
   4   4   1   58.59    3.50
   4   4   1   65.99    4.20
   4   4   1   67.39    4.20
  -5  -4  -1   82.49    4.50
  -5  -4  -1   95.89    7.00
  -5  -4  -1   97.39    4.30
   5   4   1   86.09    8.10
   5   4   1   90.09    5.30
   5   4   1   89.19    5.30
   5   4   1   92.79    5.00
   5   4   1  102.29    6.40
  -6  -4  -1   36.60    3.70
  -6  -4  -1   65.69   11.20
  -6  -4  -1   36.40    3.10
   6   4   1   40.60    4.30
   6   4   1   39.40    4.00
   6   4   1   37.50    4.00
  -7  -4  -1   21.10    3.60
  -7  -4  -1   28.10    3.40
   7   4   1   28.00    2.70
   7   4   1   30.00    2.90
   7   4   1   26.30    3.10
   8  -5  -1   -2.40    4.30
   8  -5  -1    0.60    1.70
  -8   5   1    3.00    3.40
   7  -5  -1   51.79    5.20
   7  -5  -1   63.59    5.80
   7  -5  -1   56.09    3.90
   7  -5  -1   52.69    4.50
  -7   5   1   56.39    5.60
  -7   5   1   56.59    4.00
  -7   5   1   62.19    5.50
  -7   5   1   59.69    3.50
   6  -5  -1   32.50    5.20
   6  -5  -1   33.60    5.40
   6  -5  -1   33.40    6.10
   6  -5  -1   35.70    5.40
   6  -5  -1   33.70    3.90
  -6   5   1   31.90    4.70
  -6   5   1   27.90    5.30
  -6   5   1   30.40    3.40
   5  -5  -1   20.40    4.50
   5  -5  -1   17.20    4.70
   5  -5  -1   26.30    3.80
   5  -5  -1   22.30    3.80
   5  -5  -1   25.70    5.10
  -5   5   1   17.90    2.30
  -5   5   1   18.90    3.00
  -5   5   1   19.70    2.80
   4  -5  -1   57.59    6.20
   4  -5  -1   55.19    5.10
   4  -5  -1   55.39    4.60
   4  -5  -1   55.59    7.40
   4  -5  -1   55.49    4.60
   4  -5  -1   49.80    6.70
  -4   5   1   58.19    3.80
  -4   5   1   59.59    3.30
  -4   5   1   55.89    3.30
  -4   5   1   57.99    3.70
   3  -5  -1  177.08    7.10
   3  -5  -1  178.68    8.50
   3  -5  -1  197.28    7.30
   3  -5  -1  182.48    8.10
   3  -5  -1  193.18    9.40
  -3   5   1  193.18    7.00
  -3   5   1  183.68    7.20
  -3   5   1  190.18    7.30
  -3   5   1  185.18    6.70
  -3   5   1  179.88    7.40
   2  -5  -1  983.70   30.90
   2  -5  -1  953.30   30.90
   2  -5  -1  950.60   31.50
   2  -5  -1  964.10   30.90
  -2   5   1 1030.20   31.10
  -2   5   1  955.10   30.80
  -2   5   1  956.80   30.80
  -2   5   1  964.40   31.10
  -2   5   1  976.10   31.00
  -2   5   1 1010.80   31.10
   1  -5  -1   30.10    2.10
   1  -5  -1   29.10    2.20
   1  -5  -1   31.20    1.70
   1  -5  -1   34.20    2.70
  -1   5   1   30.50    1.70
  -1   5   1   30.90    2.10
  -1   5   1   31.30    1.80
  -1   5   1   30.00    1.70
  -1   5   1   31.10    2.10
   0  -5  -1  518.55   16.70
   0  -5  -1  469.65   16.50
   0  -5  -1  535.95   16.30
   0  -5  -1  502.85   16.00
   0  -5  -1  509.25   16.70
   0   5   1  498.55   16.30
   0   5   1  501.55   16.30
   0   5   1  498.45   16.30
   0   5   1  519.95   16.30
  -1  -5  -1  767.12   24.30
  -1  -5  -1  723.63   24.30
  -1  -5  -1  775.32   24.70
  -1  -5  -1  747.03   24.60
  -1  -5  -1  767.52   23.80
  -1  -5  -1  788.72   24.60
   1   5   1  765.02   24.40
   1   5   1  788.12   24.40
   1   5   1  756.02   24.30
   1   5   1  777.82   24.30
  -2  -5  -1    5.30    1.70
  -2  -5  -1    4.10    1.00
  -2  -5  -1    4.40    1.20
  -2  -5  -1    4.10    1.50
  -2  -5  -1    4.60    1.10
   2   5   1    2.10    1.70
   2   5   1    3.30    1.30
   2   5   1    5.90    1.00
   2   5   1    4.10    1.10
  -3  -5  -1   53.89    2.90
  -3  -5  -1   60.79    3.40
  -3  -5  -1   60.69    3.40
  -3  -5  -1   60.59    3.00
   3   5   1   56.39    3.70
   3   5   1   56.39    3.30
   3   5   1   52.89    4.50
   3   5   1   44.60    6.70
   3   5   1   51.39    3.80
   3   5   1   55.09    3.30
   3   5   1   56.19    3.60
  -4  -5  -1  268.87    9.70
  -4  -5  -1  290.67   11.60
  -4  -5  -1  284.47    9.70
   4   5   1  275.17   10.60
   4   5   1  272.17    9.70
   4   5   1  280.97   11.20
   4   5   1  285.27   10.60
   4   5   1  285.57   10.40
  -5  -5  -1   71.29    7.20
  -5  -5  -1   70.19    3.90
  -5  -5  -1   78.39    4.10
   5   5   1   73.99    6.10
   5   5   1   67.49    5.70
   5   5   1   72.69    5.20
   5   5   1   71.99    4.60
   5   5   1   69.79    4.80
  -6  -5  -1   20.60    3.20
  -6  -5  -1   23.30    3.10
   6   5   1   22.70    3.60
   6   5   1   24.30    4.40
   6   5   1   21.70    3.40
  -7  -5  -1   14.00    2.80
  -7  -5  -1    7.90    2.80
   7   5   1   10.40    1.80
   7   5   1    9.00    2.40
   7   5   1   10.50    1.80
  -8   6   1  103.39    4.30
   7  -6  -1   30.20    6.10
   7  -6  -1   17.10    3.40
   7  -6  -1   21.10    3.00
   7  -6  -1   21.60    2.70
   7  -6  -1   16.20    2.70
  -7   6   1   15.40    2.60
  -7   6   1   19.30    2.90
  -7   6   1   13.00    4.10
   6  -6  -1   53.09    5.00
   6  -6  -1   62.49    7.60
   6  -6  -1   51.59    5.90
  -6   6   1   54.69    6.10
  -6   6   1   57.29    5.00
  -6   6   1   55.79    3.60
  -6   6   1   49.90    3.90
  -6   6   1   53.49    4.90
   5  -6  -1  436.26   15.60
   5  -6  -1  437.86   16.70
   5  -6  -1  408.36   16.60
   5  -6  -1  406.66   15.70
   5  -6  -1  405.26   17.30
  -5   6   1  441.26   14.50
  -5   6   1  433.66   15.30
  -5   6   1  434.96   14.60
   4  -6  -1  489.75   19.40
   4  -6  -1  517.75   18.30
  -4   6   1  530.65   17.10
  -4   6   1  536.55   17.80
  -4   6   1  523.55   17.10
  -4   6   1  480.95   17.40
  -4   6   1  527.05   17.60
   3  -6  -1  110.89    8.00
   3  -6  -1  115.09    7.20
   3  -6  -1  134.19    6.40
   3  -6  -1  113.99    9.40
   3  -6  -1  114.59    6.70
   3  -6  -1  120.89    5.90
   3  -6  -1  110.49    6.40
   3  -6  -1  107.79    5.60
  -3   6   1  119.39    4.80
  -3   6   1  118.99    5.10
  -3   6   1  107.49    6.50
  -3   6   1  119.29    4.80
  -3   6   1  116.39    5.60
  -3   6   1  106.19    5.60
   2  -6  -1   39.50    2.90
   2  -6  -1   37.20    5.50
   2  -6  -1   43.30    8.00
   2  -6  -1   47.20    4.90
   2  -6  -1   43.50    3.10
   2  -6  -1   41.60    4.70
   2  -6  -1   46.50    2.90
   2  -6  -1   41.00    3.80
  -2   6   1   38.80    3.50
  -2   6   1   44.90    2.40
  -2   6   1   42.00    2.80
  -2   6   1   45.00    2.70
  -2   6   1   45.90    2.60
   1  -6  -1  146.59    5.50
   1  -6  -1  142.69    6.80
   1  -6  -1  147.69    6.50
   1  -6  -1  139.69    5.90
   1  -6  -1  141.69    5.30
   1  -6  -1  148.19    5.60
  -1   6   1  148.79    5.30
  -1   6   1  146.39    5.30
  -1   6   1  144.59    5.50
  -1   6   1  153.98    5.50
  -1   6   1  130.89    5.80
  -1   6   1  146.59    5.60
   0  -6  -1    2.30    1.40
   0  -6  -1    1.00    1.00
   0  -6  -1    0.80    1.60
   0  -6  -1   -1.20    1.90
   0  -6  -1    0.60    0.60
   0  -6  -1   -0.10    1.10
   0   6   1    1.00    0.90
   0   6   1   -0.20    0.80
   0   6   1    0.70    0.60
   0   6   1    1.70    1.00
  -1  -6  -1  841.72   26.70
  -1  -6  -1  816.32   25.90
  -1  -6  -1  720.63   25.30
  -1  -6  -1  818.22   26.10
  -1  -6  -1  818.22   26.50
  -1  -6  -1  816.92   26.00
   1   6   1  796.22   26.20
   1   6   1  823.92   26.00
   1   6   1  874.71   26.10
   1   6   1  801.72   26.70
   1   6   1  826.72   26.10
  -2  -6  -1  659.23   21.50
  -2  -6  -1  668.43   21.00
  -2  -6  -1  657.33   21.20
   2   6   1  622.04   21.50
   2   6   1  664.73   21.40
   2   6   1  661.13   21.90
   2   6   1  651.83   21.70
   2   6   1  639.94   21.20
   2   6   1  646.84   21.40
  -3  -6  -1   19.10    2.40
  -3  -6  -1   18.10    2.30
  -3  -6  -1   15.40    2.70
   3   6   1   19.80    3.10
   3   6   1   20.00    3.30
   3   6   1   20.70    2.90
   3   6   1   16.60    2.90
   3   6   1   21.80    2.90
   3   6   1   34.70    6.60
   3   6   1   17.80    2.60
  -4  -6  -1  156.38    8.30
  -4  -6  -1  146.69    6.00
   4   6   1  144.89    6.10
   4   6   1  134.89    7.60
   4   6   1  144.89    7.40
   4   6   1  152.78    6.90
   4   6   1  161.78    7.70
   4   6   1  149.39    6.80
   4   6   1  154.08    6.50
  -5  -6  -1   34.40    3.10
  -5  -6  -1   28.70    4.50
   5   6   1   33.90    4.00
   5   6   1   37.50    3.70
   5   6   1   41.70    5.40
   5   6   1   32.90    4.80
  -6  -6  -1    7.30    2.30
  -6  -6  -1    8.50    2.10
   6   6   1   11.80    3.90
   6   6   1    7.80    3.00
   6   6   1    6.10    2.40
  -7  -6  -1    7.60    2.40
   7   6   1    6.80    1.60
   7  -7  -1    8.30    4.10
   7  -7  -1   13.50    2.40
   7  -7  -1    7.60    2.00
   7  -7  -1   11.40    1.80
  -7   7   1    9.30    2.90
  -7   7   1    9.80    1.70
  -7   7   1    9.90    1.80
   6  -7  -1   94.79    6.70
   6  -7  -1   87.69    5.50
  -6   7   1   88.19    4.20
  -6   7   1   87.39    5.80
  -6   7   1   88.49    5.60
  -6   7   1   87.89    5.20
   5  -7  -1   33.20    5.40
   5  -7  -1   28.30    4.70
   5  -7  -1   15.20    3.80
  -5   7   1   22.70    2.90
  -5   7   1   25.40    3.80
  -5   7   1   23.80    4.40
  -5   7   1   20.10    3.20
   4  -7  -1    5.20    3.40
   4  -7  -1    6.70    3.90
   4  -7  -1    4.80    4.40
   4  -7  -1    6.00    2.90
  -4   7   1    5.30    2.20
  -4   7   1    2.80    1.50
  -4   7   1    6.00    1.90
   3  -7  -1   76.09    6.70
   3  -7  -1   66.49    7.20
   3  -7  -1   80.69    6.90
   3  -7  -1   88.59    6.40
   3  -7  -1   79.79    5.10
  -3   7   1   81.29    4.10
  -3   7   1   75.49    4.10
  -3   7   1   73.09    5.10
  -3   7   1   80.69    4.30
  -3   7   1   84.19    4.10
  -3   7   1   84.59    4.10
   2  -7  -1   13.40    3.20
   2  -7  -1   15.10    3.00
   2  -7  -1    6.80    5.00
   2  -7  -1   10.60    2.40
   2  -7  -1   16.20    3.20
   2  -7  -1   14.10    3.60
   2  -7  -1   24.50    3.50
   2  -7  -1   15.20    2.30
  -2   7   1   16.20    2.10
  -2   7   1   15.80    2.60
  -2   7   1   12.20    1.90
  -2   7   1   10.40    2.20
  -2   7   1   14.10    2.50
  -2   7   1   20.50    2.60
  -2   7   1   13.80    2.10
  -2   7   1   18.80    2.20
   1  -7  -1   45.80    4.20
   1  -7  -1   48.20    3.60
   1  -7  -1   46.50    4.80
   1  -7  -1   41.90    3.30
   1  -7  -1   44.80    2.90
   1  -7  -1   48.10    6.30
   1  -7  -1   46.90    3.10
  -1   7   1   49.20    3.80
  -1   7   1   44.90    2.70
  -1   7   1   46.90    3.50
  -1   7   1   47.60    3.50
  -1   7   1   44.20    2.40
  -1   7   1   45.20    3.30
  -1   7   1   44.40    3.10
  -1   7   1   36.70    4.20
  -1   7   1   34.80    4.10
   0  -7  -1  107.59    5.40
   0  -7  -1  104.19    4.60
   0  -7  -1  100.49    4.10
   0  -7  -1  107.39    5.10
   0  -7  -1  101.49    4.70
   0   7   1  106.59    5.40
   0   7   1  105.19    4.20
   0   7   1  100.79    4.90
   0   7   1   94.79    4.60
   0   7   1  107.29    4.40
   0   7   1  102.09    4.70
   0   7   1   96.39    4.70
   0   7   1  108.49    5.00
  -1  -7  -1 1164.08   38.00
  -1  -7  -1 1236.58   37.40
  -1  -7  -1 1157.98   37.50
  -1  -7  -1 1190.78   37.60
   1   7   1 1179.88   37.50
   1   7   1 1227.68   37.60
   1   7   1 1127.39   37.40
   1   7   1 1122.89   37.60
   1   7   1 1169.98   37.60
   1   7   1 1175.48   37.70
   1   7   1 1180.18   38.00
  -2  -7  -1  725.83   24.30
  -2  -7  -1  747.43   23.50
  -2  -7  -1  737.83   23.70
   2   7   1  737.53   24.40
   2   7   1  716.63   23.90
   2   7   1  708.73   23.80
   2   7   1  726.93   23.80
   2   7   1  713.13   23.50
   2   7   1  725.03   24.10
  -3  -7  -1   74.69    4.70
  -3  -7  -1   79.59    5.90
  -3  -7  -1   76.89    4.50
   3   7   1   79.09    4.60
   3   7   1   80.69    4.50
   3   7   1   82.09    4.70
   3   7   1   76.49    7.00
   3   7   1   80.99    3.90
   3   7   1   76.09    5.10
  -4  -7  -1   27.20    3.20
  -4  -7  -1   28.90    3.60
  -4  -7  -1   28.40    4.60
   4   7   1   26.80    4.60
   4   7   1   27.80    3.50
   4   7   1   28.60    3.70
   4   7   1   19.80    4.00
   4   7   1   24.50    4.30
  -5  -7  -1   21.60    3.30
  -5  -7  -1   28.00    3.70
   5   7   1   22.30    2.90
   5   7   1   24.20    3.40
   5   7   1   22.80    4.10
   5   7   1   18.70    3.40
   5   7   1   17.10    3.80
  -6  -7  -1   22.50    3.10
  -6  -7  -1   28.80    4.00
   6   7   1   21.50    2.20
   6   7   1   20.20    2.40
   6   7   1   17.40    3.40
   7   7   1    5.40    1.70
   7   7   1    3.70    1.00
   7  -8  -1   35.10    3.20
   7  -8  -1   26.50    4.60
   7  -8  -1   29.00    2.70
  -7   8   1   32.20    4.70
  -7   8   1   34.00    3.20
   6  -8  -1   18.00    4.50
   6  -8  -1   15.10    2.50
   6  -8  -1    9.90    3.10
  -6   8   1   11.90    5.90
  -6   8   1   17.80    3.50
  -6   8   1   15.60    2.50
  -6   8   1   17.00    2.40
   5  -8  -1   64.89    6.80
   5  -8  -1   62.39    5.50
   5  -8  -1   58.19    6.20
  -5   8   1   57.89    3.70
  -5   8   1   61.39    5.10
  -5   8   1   53.19    5.70
  -5   8   1   65.19    4.30
  -5   8   1   50.09    4.60
   4  -8  -1   89.69    7.10
   4  -8  -1   98.39    6.60
   4  -8  -1   98.49    8.70
  -4   8   1   96.49    4.50
  -4   8   1   86.39    7.00
  -4   8   1   94.89    5.10
  -4   8   1   95.79    5.40
  -4   8   1   97.19    5.50
  -4   8   1   86.59    5.30
   3  -8  -1  361.86   14.40
   3  -8  -1  375.86   15.10
   3  -8  -1  370.16   15.50
   3  -8  -1  359.86   14.20
  -3   8   1  377.56   13.00
  -3   8   1  344.67   12.90
  -3   8   1  358.46   13.40
  -3   8   1  384.56   13.30
  -3   8   1  384.26   13.00
  -3   8   1  365.56   13.10
  -3   8   1  378.26   12.70
   2  -8  -1  664.03   23.30
   2  -8  -1  697.43   23.50
   2  -8  -1  681.03   22.60
   2  -8  -1  679.93   23.80
  -2   8   1  697.73   22.40
  -2   8   1  704.63   22.60
  -2   8   1  680.13   22.40
  -2   8   1  681.13   22.80
  -2   8   1  662.93   22.00
  -2   8   1  670.03   22.90
   1  -8  -1   32.80    4.60
   1  -8  -1   30.90    3.20
   1  -8  -1   28.60    4.70
   1  -8  -1   36.20    3.90
   1  -8  -1   33.20    4.90
  -1   8   1   28.40    3.60
  -1   8   1   31.50    3.10
  -1   8   1   35.70    4.60
  -1   8   1   21.50    3.90
  -1   8   1   32.50    3.10
  -1   8   1   28.50    2.40
  -1   8   1   32.30    2.70
  -1   8   1   30.10    2.60
   0  -8  -1   76.19    5.00
   0  -8  -1   80.69    6.00
   0  -8  -1   79.09    5.40
   0  -8  -1   83.69    4.30
   0   8   1   80.49    3.80
   0   8   1   81.89    4.20
   0   8   1   78.99    5.00
   0   8   1   79.19    4.40
   0   8   1   75.59    3.90
   0   8   1   78.09    4.00
   0   8   1   77.79    4.00
  -1  -8  -1   37.10    3.30
  -1  -8  -1   37.90    4.30
  -1  -8  -1   36.20    4.20
   1   8   1   39.00    2.80
   1   8   1   40.40    3.10
   1   8   1   31.00    3.40
   1   8   1   39.20    3.70
   1   8   1   33.20    4.30
  -2  -8  -1   70.99    4.30
  -2  -8  -1   62.99    5.40
   2   8   1   68.99    4.80
   2   8   1   61.39    4.20
   2   8   1   69.89    4.30
   2   8   1   68.39    4.30
   2   8   1   70.59    5.50
   2   8   1   64.29    4.10
  -3  -8  -1  145.39    8.10
  -3  -8  -1  139.39    6.00
  -3  -8  -1  131.89    6.20
   3   8   1  137.19    5.80
   3   8   1  139.29    6.20
   3   8   1  143.39    7.00
   3   8   1  137.29    6.40
   3   8   1  144.29    7.50
  -4  -8  -1   69.59    4.90
  -4  -8  -1   80.69    8.40
  -4  -8  -1   71.29    4.20
   4   8   1   64.79    5.20
   4   8   1   78.09    4.50
   4   8   1   75.69    4.90
   4   8   1   75.19    5.80
  -5  -8  -1   17.60    2.80
  -5  -8  -1   11.40    2.10
   5   8   1   15.10    2.60
   5   8   1   17.50    2.80
   5   8   1   23.80    3.90
  -6  -8  -1    0.90    3.10
  -6  -8  -1    1.00    2.30
   6   8   1    1.40    1.20
   6   8   1   -2.90    2.70
   6   8   1    0.40    1.30
   7  -9  -1    7.30    2.80
   7  -9  -1    5.10    2.00
   7  -9  -1    3.10    2.70
  -7   9   1    3.90    2.00
   6  -9  -1    6.70    2.80
   6  -9  -1    4.10    3.90
   6  -9  -1    2.00    1.40
  -6   9   1    4.90    1.90
  -6   9   1    1.60    2.20
  -6   9   1    2.90    5.20
   5  -9  -1    9.30    3.20
   5  -9  -1    8.50    3.40
  -5   9   1   11.90    3.00
  -5   9   1   14.60    2.90
  -5   9   1    6.90    2.20
  -5   9   1    7.70    4.10
   4  -9  -1   34.70    5.40
   4  -9  -1   33.10    4.90
   4  -9  -1   34.50    5.90
   4  -9  -1   16.80    7.20
  -4   9   1   37.00    4.50
  -4   9   1   39.90    4.00
  -4   9   1   30.10    4.90
  -4   9   1   32.80    5.70
  -4   9   1   36.00    3.90
  -4   9   1   25.90    3.80
   3  -9  -1   10.80    4.30
   3  -9  -1   15.30    4.30
   3  -9  -1   19.70    4.00
   3  -9  -1    9.60    3.70
  -3   9   1   11.70    2.90
  -3   9   1   19.20    3.00
  -3   9   1   17.20    3.00
  -3   9   1   20.90    2.90
  -3   9   1   11.00    2.60
  -3   9   1   18.90    3.00
   2  -9  -1   30.40    5.40
   2  -9  -1   32.20    5.00
   2  -9  -1   27.60    5.00
   2  -9  -1   34.60    5.80
   2  -9  -1   26.50    5.50
  -2   9   1   29.90    3.00
  -2   9   1   35.80    4.30
  -2   9   1   36.10    3.70
  -2   9   1   33.80    3.40
  -2   9   1   28.10    3.20
  -2   9   1   30.10    2.80
  -2   9   1   25.80    4.30
   1  -9  -1   37.00    5.00
   1  -9  -1   42.30    5.30
   1  -9  -1   36.40    4.00
   1  -9  -1   40.50    5.40
  -1   9   1   40.30    3.00
  -1   9   1   38.10    3.50
  -1   9   1   38.40    3.40
  -1   9   1   34.00    3.30
  -1   9   1   39.20    4.30
  -1   9   1   37.40    5.10
  -1   9   1   36.80    3.70
   0  -9  -1  148.89    7.70
   0  -9  -1  146.69    8.70
   0  -9  -1  146.39    7.80
   0   9   1  154.08    6.50
   0   9   1  149.69    6.20
   0   9   1  149.09    6.60
   0   9   1  151.78    6.70
   0   9   1  144.39    7.60
   0   9   1  150.68    7.20
   0   9   1  139.59    6.30
  -1  -9  -1 1035.80   35.30
  -1  -9  -1 1073.79   34.70
  -1  -9  -1 1060.19   34.00
   1   9   1 1068.39   34.10
   1   9   1 1077.39   34.30
   1   9   1 1050.89   34.20
   1   9   1 1046.60   34.10
   1   9   1 1035.20   34.80
   1   9   1 1058.09   34.40
   1   9   1 1059.49   34.80
  -2  -9  -1  774.12   25.50
  -2  -9  -1  791.42   24.90
   2   9   1  763.22   25.80
   2   9   1  716.23   25.30
   2   9   1  772.72   24.70
   2   9   1  766.52   25.70
   2   9   1  749.82   24.90
   2   9   1  745.53   25.10
   2   9   1  720.73   25.10
  -3  -9  -1    6.40    4.70
  -3  -9  -1    4.70    2.20
  -3  -9  -1    5.90    2.70
   3   9   1    4.80    2.10
   3   9   1    7.70    2.00
   3   9   1    7.50    3.00
   3   9   1    6.30    2.70
   3   9   1    1.80    2.30
  -4  -9  -1  141.89    6.80
  -4  -9  -1  135.69    6.00
   4   9   1  147.29    7.50
   4   9   1  118.59    6.70
   4   9   1  152.28    6.60
  -5  -9  -1   11.90    2.70
  -5  -9  -1   12.00    2.40
   5   9   1   12.00    2.00
   5   9   1   13.90    2.20
   5   9   1   13.80    2.40
  -6  -9  -1   56.49    5.40
   6   9   1   54.59    4.20
   6   9   1   64.49    3.10
   6   9   1   56.69    3.30
   6 -10  -1   18.90    2.20
   6 -10  -1   19.20    5.20
   6 -10  -1   20.30    2.60
  -6  10   1   26.20    3.10
   5 -10  -1    2.90    2.70
   5 -10  -1    0.50    3.40
   5 -10  -1    3.60    2.80
  -5  10   1    2.20    3.90
  -5  10   1    5.60    2.10
  -5  10   1   -3.60    3.20
   4 -10  -1   14.20    4.50
   4 -10  -1    8.20    3.50
   4 -10  -1    7.80    3.30
  -4  10   1   11.10    2.80
  -4  10   1    8.00    2.70
  -4  10   1   11.30    2.10
   3 -10  -1   47.40    6.80
   3 -10  -1   45.80    8.70
   3 -10  -1   35.60    6.10
   3 -10  -1   51.79    6.20
  -3  10   1   37.80    5.20
  -3  10   1   41.70    4.10
  -3  10   1   48.80    4.60
  -3  10   1   41.40    4.00
  -3  10   1   45.50    4.60
   2 -10  -1   11.10    4.80
   2 -10  -1   10.50    3.70
   2 -10  -1   11.70    4.50
   2 -10  -1   18.20    4.40
  -2  10   1   12.90    2.60
  -2  10   1   10.10    2.90
  -2  10   1   10.90    2.90
  -2  10   1   12.80    2.40
  -2  10   1   14.80    2.80
   1 -10  -1    1.10    3.40
   1 -10  -1    0.60    4.10
   1 -10  -1   -6.20    3.10
   1 -10  -1    2.50    2.90
   1 -10  -1    7.60    5.20
  -1  10   1   -7.00    3.60
  -1  10   1    1.00    2.00
  -1  10   1    1.20    2.40
  -1  10   1   -1.60    3.40
  -1  10   1   -0.40    1.50
  -1  10   1   -0.40    2.80
  -1  10   1    0.40    2.10
   0 -10  -1  120.49    5.70
   0 -10  -1  127.09    8.40
   0 -10  -1  131.59    8.00
   0 -10  -1  123.59    6.70
   0  10   1  121.39    5.80
   0  10   1  120.59    6.50
   0  10   1  105.59    7.00
   0  10   1  121.69    5.70
   0  10   1  114.59    5.80
   0  10   1  122.19    6.10
   0  10   1  121.89    6.90
  -1 -10  -1  177.68    7.30
  -1 -10  -1  190.88    8.90
  -1 -10  -1  175.28   10.20
  -1 -10  -1  176.48   10.50
   1  10   1  162.18    7.80
   1  10   1  173.78    8.20
   1  10   1  173.48    7.70
   1  10   1  187.18    8.50
   1  10   1  183.18    7.40
   1  10   1  185.78    7.30
  -2 -10  -1  804.12   26.70
  -2 -10  -1  772.92   27.40
   2  10   1  795.12   25.70
   2  10   1  787.72   26.80
   2  10   1  815.22   26.20
   2  10   1  745.03   26.70
   2  10   1  816.92   26.80
   2  10   1  779.72   26.20
   2  10   1  796.42   26.00
  -3 -10  -1   48.20    4.30
  -3 -10  -1   44.70    5.20
   3  10   1   36.30    5.00
   3  10   1   41.40    4.30
   3  10   1   43.70    3.70
  -4 -10  -1   10.20    2.50
  -4 -10  -1   10.40    3.10
   4  10   1   12.20    2.40
   4  10   1   11.60    2.00
   4  10   1   10.20    1.70
  -5 -10  -1   22.00    6.00
  -5 -10  -1    8.10    2.80
   5  10   1   17.80    3.10
   5  10   1   15.00    2.40
   5  10   1   14.60    1.80
   5 -11  -1    0.90    2.30
   5 -11  -1    6.90    3.00
   5 -11  -1    5.80    2.40
  -5  11   1    6.70    3.70
   4 -11  -1    0.40    2.90
   4 -11  -1    8.50    2.60
   4 -11  -1    7.10    2.70
  -4  11   1    3.60    2.80
  -4  11   1    6.00    1.60
  -4  11   1    3.60    3.50
  -4  11   1    2.80    2.10
   3 -11  -1   23.00    7.40
  -3  11   1   19.70    3.10
   2 -11  -1   -7.80    5.70
   2 -11  -1    1.80    3.40
   2 -11  -1    2.00    4.60
   2 -11  -1    5.50    4.00
  -2  11   1    5.50    3.00
  -2  11   1    2.80    2.20
  -2  11   1    8.50    4.90
  -2  11   1    0.10    2.80
  -2  11   1    5.20    2.30
   1 -11  -1   10.40    3.80
   1 -11  -1    7.00    3.80
   1 -11  -1   10.70    4.50
   1 -11  -1    7.40    7.00
   1 -11  -1   10.40    3.60
  -1  11   1    8.80    2.40
  -1  11   1    9.70    2.00
  -1  11   1    9.40    3.10
   0 -11  -1   41.40    4.90
   0 -11  -1   43.40    4.00
   0 -11  -1   39.50    5.80
   0  11   1   47.00    3.40
   0  11   1   41.10    3.60
   0  11   1   43.90    3.70
  -1 -11  -1   51.99    5.30
  -1 -11  -1   44.20    3.80
  -1 -11  -1   51.29    6.30
   1  11   1   45.90    4.20
   1  11   1   44.40    3.30
   1  11   1   47.80    5.30
   1  11   1   45.70    4.50
   1  11   1   50.09    3.40
  -2 -11  -1   26.90    4.90
  -2 -11  -1   27.80    4.50
  -2 -11  -1   23.80    4.30
   2  11   1   28.40    3.70
  -3 -11  -1   26.20    5.10
  -3 -11  -1   30.80    4.80
  -3 -11  -1   30.80    4.80
   3  11   1   30.40    3.20
   3  11   1   34.80    3.30
   3  11   1   34.60    4.10
   3  11   1   29.60    2.50
  -4 -11  -1   14.90    3.50
  -4 -11  -1   14.50    5.00
   4  11   1   13.60    1.80
   4  11   1   14.50    2.00
   5 -12  -1   10.40    2.10
   5 -12  -1   13.50    3.20
  -5  12   1   15.00    3.80
  -5  12   1   15.10    2.70
   4 -12  -1   -3.10    2.90
   4 -12  -1    0.20    1.60
   4 -12  -1   -0.10    1.80
  -4  12   1   -0.80    1.70
  -4  12   1    2.90    1.50
  -4  12   1    0.50    1.30
   3 -12  -1   12.80    3.30
   3 -12  -1   18.20    3.00
   3 -12  -1   16.30    3.70
  -3  12   1   17.60    3.50
  -3  12   1   24.20    2.40
  -3  12   1   18.50    2.70
   2 -12  -1    2.70    2.90
   2 -12  -1    7.30    3.20
   2 -12  -1    3.70    3.20
  -2  12   1    4.50    2.80
  -2  12   1    2.40    2.00
  -2  12   1    5.70    2.90
   1 -12  -1   -3.70    3.00
   1 -12  -1    1.60    4.10
  -1  12   1    2.20    1.30
  -1  12   1    2.60    2.80
  -1  12   1    1.10    2.10
   0 -12  -1   10.20    3.40
   0 -12  -1   17.90    3.50
   0  12   1   15.00    3.50
   0  12   1   16.80    2.50
   0  12   1   16.10    1.90
  -1 -12  -1  403.06   18.30
  -1 -12  -1  442.16   16.00
  -1 -12  -1  461.65   16.60
   1  12   1  463.55   15.10
   1  12   1  469.85   16.00
   1  12   1  447.56   15.50
   1  12   1  460.85   15.90
  -2 -12  -1   33.50    4.70
  -2 -12  -1   40.10    4.40
  -2 -12  -1   32.70    4.10
   2  12   1   32.70    3.00
   2  12   1   36.00    2.60
   2  12   1   23.50    3.70
   2  12   1   29.40    2.90
  -3 -12  -1   -1.30    2.80
  -3 -12  -1   -4.70    5.70
   3  12   1   -2.30    1.40
   3  12   1   -3.10    3.30
   3  12   1    2.90    1.60
   3 -13  -1    9.60    2.10
   3 -13  -1    8.20    3.10
   3 -13  -1   15.10    3.80
  -3  13   1    5.40    1.90
  -3  13   1   10.50    1.80
  -3  13   1   11.60    2.60
   2 -13  -1   10.50    6.10
   2 -13  -1    5.80    2.90
  -2  13   1    5.20    1.80
  -2  13   1    3.70    1.80
   1 -13  -1   13.70    3.00
  -1  13   1   14.40    2.50
  -1  13   1   12.80    1.80
   0 -13  -1   55.09    8.50
   0 -13  -1   57.09    4.90
   0  13   1   58.69    3.10
   0  13   1   56.59    3.00
  -1 -13  -1   74.79    5.70
  -1 -13  -1   91.19   10.10
   1  13   1   72.19    4.60
   1  13   1   63.99    3.50
   1  13   1   69.69    3.20
  -2 -13  -1   36.80    4.50
   2  13   1   39.10    4.90
   2  14  -2    2.80    2.30
  -2 -14   2    1.10    2.70
   1  14  -2    1.20    1.30
  -1 -14   2   -4.10    2.70
  -1 -14   2    1.70    2.80
   0  14  -2   21.00    2.40
   0  14  -2   15.40    1.90
   0 -14   2   21.30    4.00
   0 -14   2   22.60    4.60
  -1  14  -2    6.70    1.40
  -1  14  -2    6.90    1.50
   1 -14   2    8.50    2.90
  -2  14  -2   14.80    2.30
  -2  14  -2   19.00    2.50
   2 -14   2   12.80    2.40
  -3  14  -2    7.00    2.80
  -3  14  -2    9.30    1.40
   3 -14   2   10.20    2.10
   3 -14   2   10.10    2.90
   3  13  -2    3.00    1.60
   3  13  -2    2.20    1.40
   3  13  -2    3.70    2.80
  -3 -13   2    4.40    2.70
   2  13  -2    4.80    1.30
   2  13  -2    2.50    1.70
   2  13  -2    2.00    2.00
   2  13  -2    4.60    1.60
  -2 -13   2   -0.60    2.50
  -2 -13   2    2.00    2.60
   1  13  -2   33.90    2.40
   1  13  -2   39.60    2.60
   1  13  -2   42.80    4.30
  -1 -13   2   36.00    4.30
  -1 -13   2   41.50    4.50
   0  13  -2   11.50    2.10
   0  13  -2   20.00    2.60
   0 -13   2   17.00    2.90
  -1  13  -2   28.70    2.80
  -1  13  -2   36.50    3.30
   1 -13   2   24.40    4.00
   1 -13   2   35.30    5.40
  -2  13  -2  103.99    5.50
  -2  13  -2  117.99    5.20
  -2  13  -2  104.89    4.80
   2 -13   2  103.89    8.40
   2 -13   2  115.19    7.50
   2 -13   2  110.09    6.10
  -3  13  -2    0.10    1.90
  -3  13  -2    0.00    1.40
  -3  13  -2   -1.00    1.70
   3 -13   2    0.80    1.80
   3 -13   2    0.80    3.10
   3 -13   2    1.70    3.60
  -4  13  -2   -1.70    1.60
  -4  13  -2    3.20    1.90
  -4  13  -2    0.30    1.50
   4 -13   2   -1.50    2.80
   4 -13   2   -0.60    2.40
   4  12  -2    1.70    1.50
   4  12  -2   -0.60    2.00
   4  12  -2    1.80    1.20
  -4 -12   2    0.80    2.90
  -4 -12   2   -0.30    2.60
   3  12  -2    8.20    2.50
   3  12  -2   10.70    1.70
   3  12  -2   11.10    1.60
  -3 -12   2   14.90    3.40
  -3 -12   2    4.80    2.30
   2  12  -2  162.98    6.80
   2  12  -2  154.38    5.90
   2  12  -2  150.98    7.30
   2  12  -2  149.09    6.90
   2  12  -2  165.28    6.60
  -2 -12   2  157.78    7.70
  -2 -12   2  154.68    7.10
   1  12  -2   26.00    3.50
   1  12  -2   19.70    3.30
   1  12  -2   24.50    2.60
   1  12  -2    7.40    6.40
  -1 -12   2   18.90    3.40
  -1 -12   2   17.50    3.20
   0  12  -2  107.49    5.20
   0  12  -2   86.29    7.80
   0  12  -2  104.79    5.10
   0 -12   2  118.69    6.50
   0 -12   2  104.19    5.80
  -1  12  -2   14.50    4.90
  -1  12  -2   20.80    3.50
  -1  12  -2   22.60    3.30
   1 -12   2   15.90    3.50
  -2  12  -2  164.98    7.10
  -2  12  -2  157.98    6.80
   2 -12   2  161.88   11.10
   2 -12   2  162.18    9.70
   2 -12   2  168.58    9.80
  -3  12  -2    4.90    2.10
  -3  12  -2    2.60    2.00
  -3  12  -2    2.80    2.00
   3 -12   2    2.60    3.90
   3 -12   2    0.30    3.20
   3 -12   2    0.40    3.10
  -4  12  -2   20.80    3.40
  -4  12  -2   14.50    2.10
  -4  12  -2   18.70    3.20
   4 -12   2   17.40    3.00
   4 -12   2   15.90    3.00
   4 -12   2   12.70    2.80
  -5  12  -2   11.20    2.10
  -5  12  -2    9.10    3.00
   5 -12   2    8.80    2.30
   5 -12   2   10.60    3.80
   5 -12   2   10.30    2.20
   5  11  -2   13.80    2.30
   5  11  -2   15.50    2.00
   5  11  -2   19.40    3.20
  -5 -11   2   15.10    3.90
   4  11  -2   12.80    2.10
   4  11  -2   10.10    2.50
   4  11  -2    8.60    1.90
  -4 -11   2   15.30    3.20
  -4 -11   2    9.90    2.80
   3  11  -2   15.00    2.40
   3  11  -2    1.60    5.80
   3  11  -2   22.90    4.50
   3  11  -2    5.80    3.20
  -3 -11   2   11.30    2.50
  -3 -11   2   15.90    3.40
   2  11  -2   14.30    2.80
   2  11  -2   12.20    2.30
   2  11  -2   19.40    2.90
   2  11  -2   24.30    4.20
   2  11  -2   13.50    3.30
   2  11  -2    4.20    3.80
  -2 -11   2   14.30    3.30
  -2 -11   2   20.00    7.10
  -2 -11   2   16.10    2.70
   1  11  -2   26.10    3.60
   1  11  -2   21.60    3.70
   1  11  -2   23.70    2.90
   1  11  -2   24.00    3.70
   1  11  -2   25.20    2.90
   1  11  -2   23.10    3.80
  -1 -11   2   24.30    3.40
   0  11  -2   24.60    3.50
   0  11  -2   23.00    3.60
   0  11  -2   18.40    2.80
   0  11  -2   29.20    5.20
   0  11  -2   23.30    3.60
   0  11  -2   23.40    3.80
   0 -11   2   13.70    4.00
   0 -11   2   19.20    2.70
   0 -11   2   14.00    4.00
   0 -11   2   12.30    4.50
  -1  11  -2  180.58    7.90
  -1  11  -2  182.18    7.70
  -1  11  -2  163.88    8.20
  -1  11  -2  186.38    7.50
  -1  11  -2  166.88    7.60
   1 -11   2  166.68    9.30
   1 -11   2  165.38    8.60
   1 -11   2  171.68    7.40
  -2  11  -2  202.98    8.10
  -2  11  -2  173.98    8.60
  -2  11  -2  176.68    9.10
  -2  11  -2  192.68    8.20
  -2  11  -2  191.68    7.70
  -2  11  -2  187.58    8.00
   2 -11   2  182.18   10.50
   2 -11   2  187.58   10.40
   2 -11   2  192.58   10.70
   2 -11   2  178.18    9.20
   2 -11   2  175.08    9.50
  -3  11  -2    2.60    2.60
  -3  11  -2    7.00    2.60
  -3  11  -2    4.30    3.20
  -3  11  -2    1.70    2.30
  -3  11  -2   -3.90    4.50
   3 -11   2    9.70    3.60
   3 -11   2    2.10    4.20
   3 -11   2    2.00    3.70
  -4  11  -2   23.60    3.50
  -4  11  -2   22.80    4.10
  -4  11  -2   15.20    4.10
   4 -11   2   28.40    4.40
   4 -11   2   31.90    4.80
   4 -11   2   22.40    3.50
  -5  11  -2    6.30    3.40
  -5  11  -2    4.40    2.10
   5 -11   2    8.60    2.60
   5 -11   2    4.80    1.80
   5 -11   2    3.60    2.60
  -6  11  -2    1.70    1.30
   6 -11   2    0.90    2.80
   6 -11   2    3.50    1.80
   6  10  -2   10.10    2.00
   6  10  -2    6.30    1.40
   6  10  -2    8.00    1.40
   5  10  -2    3.80    1.40
   5  10  -2    3.20    1.80
   5  10  -2    2.30    1.50
  -5 -10   2    0.40    4.00
  -5 -10   2    1.70    2.80
   4  10  -2  189.48    7.50
   4  10  -2  180.98    8.70
   4  10  -2  197.98    7.80
  -4 -10   2  177.38    8.80
  -4 -10   2  174.18    7.30
   3  10  -2   31.40    4.90
   3  10  -2   40.10    5.10
   3  10  -2   37.70    3.80
   3  10  -2   31.10    5.00
   3  10  -2   30.20    4.00
  -3 -10   2   36.10    3.60
  -3 -10   2   40.10    7.40
  -3 -10   2   23.20    3.70
   2  10  -2   29.90    3.80
   2  10  -2   32.20    3.10
   2  10  -2   34.20    4.20
   2  10  -2   31.80    4.10
   2  10  -2   26.90    4.80
   2  10  -2   25.00    4.10
   2  10  -2   25.50    3.50
  -2 -10   2   33.80    5.20
  -2 -10   2   18.10    5.30
  -2 -10   2   19.00    4.70
  -2 -10   2   31.00    3.40
   1  10  -2   11.60    2.70
   1  10  -2   14.90    2.60
   1  10  -2   12.70    3.20
   1  10  -2   15.60    2.50
   1  10  -2   11.70    2.70
   1  10  -2    8.70    2.10
   1  10  -2   16.50    2.60
  -1 -10   2    4.50    4.00
  -1 -10   2   20.90    7.70
  -1 -10   2   13.40    3.00
  -1 -10   2   20.20    3.20
   0  10  -2  203.48    8.50
   0  10  -2  198.48    9.40
   0  10  -2  183.98    8.10
   0  10  -2  192.58    7.90
   0  10  -2  192.48    8.00
   0  10  -2  181.28    7.60
   0  10  -2  187.88    7.50
   0  10  -2  201.18    7.90
   0  10  -2  186.28    9.30
   0 -10   2  184.98    9.10
   0 -10   2  193.18    8.80
   0 -10   2  199.28    7.70
  -1  10  -2   -0.90    2.30
  -1  10  -2    3.30    2.30
  -1  10  -2    3.20    2.40
  -1  10  -2    2.30    2.60
  -1  10  -2    1.20    2.00
  -1  10  -2    4.70    1.90
   1 -10   2    3.00    2.10
   1 -10   2    1.90    3.40
   1 -10   2    3.50    3.20
   1 -10   2   -2.00    4.30
  -2  10  -2   27.00    3.50
  -2  10  -2   27.80    2.90
  -2  10  -2   28.70    3.80
  -2  10  -2   28.40    5.20
   2 -10   2   26.50    3.70
   2 -10   2   35.40    7.00
   2 -10   2   36.00    5.10
   2 -10   2   30.10    5.20
   2 -10   2   28.00    5.20
   2 -10   2   21.90    4.80
  -3  10  -2   32.90    4.30
  -3  10  -2   27.50    3.80
  -3  10  -2   29.70    3.90
  -3  10  -2   34.30    4.20
  -3  10  -2   28.50    4.80
  -3  10  -2   31.90    5.20
   3 -10   2   27.20    4.70
   3 -10   2   30.90    5.30
   3 -10   2   20.80    4.70
   3 -10   2   23.50    5.80
  -4  10  -2    2.50    4.60
  -4  10  -2    2.30    4.60
  -4  10  -2    8.20    3.00
  -4  10  -2    3.70    3.00
  -4  10  -2    3.50    2.80
   4 -10   2    1.90    3.60
   4 -10   2   12.70    4.30
   4 -10   2    9.80    3.60
  -5  10  -2   71.99    6.00
  -5  10  -2   65.99    5.00
  -5  10  -2   75.09    4.30
   5 -10   2   81.09    5.80
   5 -10   2   76.79    5.40
   5 -10   2   80.99    5.40
  -6  10  -2    0.80    1.90
   6 -10   2    0.60    2.30
   6 -10   2   -1.50    2.20
   6 -10   2   -1.40    1.20
   6   9  -2   85.49    4.60
   6   9  -2   93.99    4.40
   6   9  -2   94.19    4.40
   5   9  -2    2.90    2.90
  -5  -9   2    2.90    3.40
  -5  -9   2    4.50    2.80
   4   9  -2    9.00    2.10
   4   9  -2   10.30    2.50
   4   9  -2   12.90    3.30
  -4  -9   2   11.10    5.50
  -4  -9   2    7.00    3.10
  -4  -9   2   12.80    2.00
   3   9  -2    9.40    3.40
   3   9  -2   16.00    2.60
   3   9  -2   10.30    2.20
   3   9  -2    9.60    3.20
   3   9  -2   14.00    3.00
  -3  -9   2   13.70    3.10
  -3  -9   2   10.10    2.10
   2   9  -2  106.79    5.70
   2   9  -2  112.89    5.70
   2   9  -2  109.89    5.40
   2   9  -2  102.69    5.40
   2   9  -2  111.49    5.60
   2   9  -2  102.69    4.90
   2   9  -2  106.49    6.40
  -2  -9   2  102.09    6.50
  -2  -9   2  103.49    6.40
   1   9  -2   11.60    2.60
   1   9  -2   12.20    2.50
   1   9  -2   15.00    2.70
   1   9  -2   11.20    2.00
   1   9  -2   15.80    2.80
   1   9  -2   15.60    2.40
  -1  -9   2   17.70    3.00
  -1  -9   2   14.40    3.00
  -1  -9   2   13.90    4.60
  -1  -9   2   14.60    3.20
   0   9  -2  459.85   15.30
   0   9  -2  446.76   15.60
   0   9  -2  450.75   16.30
   0   9  -2  464.05   15.80
   0   9  -2  436.06   16.40
   0  -9   2  467.25   16.50
   0  -9   2  467.15   16.40
   0  -9   2  455.85   15.50
   0  -9   2  459.35   17.60
  -1   9  -2   38.00    2.80
  -1   9  -2   36.80    3.00
  -1   9  -2   41.20    3.30
  -1   9  -2   45.40    4.10
  -1   9  -2   35.50    4.50
  -1   9  -2   35.70    3.80
  -1   9  -2   45.10    4.30
  -1   9  -2   36.30    3.50
   1  -9   2   34.60    5.90
   1  -9   2   36.20    5.20
   1  -9   2   41.60    4.30
   1  -9   2   38.30    3.40
  -2   9  -2    4.90    2.10
  -2   9  -2    1.80    1.80
  -2   9  -2    9.50    2.30
  -2   9  -2    3.60    1.60
  -2   9  -2    5.90    2.30
  -2   9  -2    5.90    2.20
   2  -9   2    6.40    2.80
   2  -9   2    2.80    3.00
   2  -9   2    1.30    3.60
   2  -9   2    8.10    2.60
   2  -9   2    4.90    4.10
  -3   9  -2   13.20    2.20
  -3   9  -2    9.10    2.30
  -3   9  -2   11.50    2.80
  -3   9  -2   13.00    2.80
  -3   9  -2   17.00    2.70
  -3   9  -2    7.80    2.40
  -3   9  -2   17.30    3.20
   3  -9   2   26.00    5.50
   3  -9   2   14.70    4.30
   3  -9   2   13.90    3.90
   3  -9   2   12.90    3.80
  -4   9  -2   24.70    4.10
  -4   9  -2   25.20    4.60
  -4   9  -2   30.50    4.00
  -4   9  -2   25.30    4.40
  -4   9  -2   29.90    3.60
  -4   9  -2   21.60    3.00
   4  -9   2   24.70    4.00
   4  -9   2   22.20    4.50
   4  -9   2   22.60    4.30
  -5   9  -2   20.00    4.60
  -5   9  -2   16.10    2.50
  -5   9  -2   15.80    3.30
  -5   9  -2   22.70    4.10
   5  -9   2   20.40    3.40
   5  -9   2   22.20    4.10
   5  -9   2   20.50    3.60
  -6   9  -2    8.00    2.30
  -6   9  -2   10.20    2.30
   6  -9   2    8.60    2.20
   6  -9   2    9.80    2.00
   6  -9   2   12.60    2.70
  -7   9  -2    3.50    2.00
  -7   9  -2    3.50    1.20
   7  -9   2    4.40    1.40
   7  -9   2    5.80    1.70
   7  -9   2    7.60    3.60
   7   8  -2   57.39    2.90
   7   8  -2   59.09    3.40
   6   8  -2    9.70    1.80
   6   8  -2   13.60    3.00
  -6  -8   2   12.40    2.80
   5   8  -2   34.80    3.90
   5   8  -2   32.60    3.40
   5   8  -2   29.60    4.80
  -5  -8   2   24.50    7.00
  -5  -8   2   34.90    3.80
  -5  -8   2   29.60    4.90
   4   8  -2   21.00    3.60
   4   8  -2   19.90    3.40
   4   8  -2   16.40    3.00
  -4  -8   2   15.90    3.20
  -4  -8   2   15.80    2.30
   3   8  -2   58.09    3.70
   3   8  -2   60.59    4.60
   3   8  -2   49.20    3.90
   3   8  -2   55.29    4.10
   3   8  -2   49.50    5.00
  -3  -8   2   57.09    4.20
  -3  -8   2   50.69    4.70
  -3  -8   2   53.29    3.70
   2   8  -2  224.38    9.00
   2   8  -2  213.98    8.00
   2   8  -2  249.38    9.00
   2   8  -2  220.48    8.50
   2   8  -2  207.28    9.10
   2   8  -2  223.08    8.80
   2   8  -2  222.48    8.60
  -2  -8   2  215.48    9.00
  -2  -8   2  217.88    8.00
  -2  -8   2  218.48    8.60
   1   8  -2   12.70    2.30
   1   8  -2   17.30    2.20
   1   8  -2   11.20    1.70
   1   8  -2   13.90    2.20
   1   8  -2   14.10    1.90
   1   8  -2   17.00    3.20
   1   8  -2   13.70    2.80
   1   8  -2   14.60    2.30
  -1  -8   2   16.30    2.60
  -1  -8   2   12.70    2.00
  -1  -8   2   15.30    2.50
  -1  -8   2   14.60    3.00
   0   8  -2  106.19    5.50
   0   8  -2  114.29    5.40
   0   8  -2  111.69    6.70
   0   8  -2  117.09    5.30
   0   8  -2  110.19    5.90
   0   8  -2  120.99    4.70
   0   8  -2  114.99    5.90
   0   8  -2  122.39    4.80
   0   8  -2  115.69    5.30
   0   8  -2  119.99    5.10
   0   8  -2  120.19    7.10
   0  -8   2  119.39    5.00
   0  -8   2  124.99    5.30
   0  -8   2  120.49    9.10
   0  -8   2  114.59    5.70
   0  -8   2  126.39    5.80
  -1   8  -2   97.39    5.50
  -1   8  -2   99.99    4.80
  -1   8  -2  103.09    4.70
  -1   8  -2  105.19    4.30
  -1   8  -2  108.19    4.30
  -1   8  -2  102.99    5.90
  -1   8  -2  101.99    4.60
  -1   8  -2   96.19    4.90
  -1   8  -2   95.59    5.60
   1  -8   2  101.79    4.70
   1  -8   2  108.99    6.00
   1  -8   2   89.69    9.50
   1  -8   2  102.69    8.30
   1  -8   2   99.69    5.20
  -2   8  -2   86.79    4.40
  -2   8  -2   87.89    5.00
  -2   8  -2   92.19    4.50
  -2   8  -2   87.99    4.60
  -2   8  -2   93.19    5.00
  -2   8  -2   93.69    4.80
   2  -8   2   81.59    6.70
   2  -8   2   92.69    7.10
   2  -8   2   85.29    5.50
   2  -8   2   92.69    5.50
  -3   8  -2   11.70    1.90
  -3   8  -2    8.80    2.80
  -3   8  -2   11.60    1.90
  -3   8  -2   11.10    2.50
  -3   8  -2    9.70    2.50
   3  -8   2    9.90    3.50
   3  -8   2    8.10    2.80
   3  -8   2    8.70    3.80
   3  -8   2    8.30    5.40
  -4   8  -2   70.89    5.10
  -4   8  -2   65.29    4.80
  -4   8  -2   67.39    4.40
  -4   8  -2   69.79    4.00
  -4   8  -2   64.39    5.40
  -4   8  -2   67.49    5.10
   4  -8   2   68.39    7.00
   4  -8   2   67.89    5.90
   4  -8   2   65.09    6.40
  -5   8  -2    8.90    5.70
  -5   8  -2   10.80    3.10
  -5   8  -2   12.20    2.20
  -5   8  -2    5.40    2.40
  -5   8  -2   18.80    4.10
  -5   8  -2   12.20    3.00
   5  -8   2   11.20    3.20
   5  -8   2   14.40    3.90
   5  -8   2   11.60    3.60
  -6   8  -2   29.00    2.60
  -6   8  -2   27.90    5.10
   6  -8   2   38.40    3.40
   6  -8   2   32.60    4.30
   6  -8   2   28.40    3.50
  -7   8  -2    6.50    2.10
  -7   8  -2    8.60    2.40
   7  -8   2    7.90    2.40
   7  -8   2    9.00    1.60
   7   7  -2   42.80    3.10
   7   7  -2   38.10    2.70
   6   7  -2    1.00    3.70
   6   7  -2   -0.30    3.20
   5   7  -2    9.00    2.40
   5   7  -2   11.90    3.20
   5   7  -2    7.00    4.10
   5   7  -2   13.20    2.60
  -5  -7   2   12.70    4.90
   4   7  -2  182.18    7.90
   4   7  -2  181.68    8.40
   4   7  -2  182.08    7.60
   4   7  -2  185.88    7.70
   4   7  -2  186.38    8.60
  -4  -7   2  182.78    7.40
   3   7  -2    7.90    1.90
   3   7  -2    7.50    1.70
   3   7  -2    3.90    2.50
   3   7  -2    8.60    2.50
   3   7  -2   14.90    3.60
   3   7  -2    8.80    2.00
  -3  -7   2    4.70    1.50
  -3  -7   2    5.20    2.60
  -3  -7   2    7.90    2.20
   2   7  -2  274.47   10.50
   2   7  -2  272.47   10.00
   2   7  -2  259.27    9.70
   2   7  -2  280.87    9.90
   2   7  -2  277.27   10.50
   2   7  -2  271.07   10.40
   2   7  -2  273.17    9.80
  -2  -7   2  283.17    9.40
  -2  -7   2  273.17    9.70
  -2  -7   2  291.37   10.40
  -2  -7   2  275.57    9.40
   1   7  -2   96.19    5.00
   1   7  -2   98.29    4.90
   1   7  -2   95.19    4.20
   1   7  -2   89.99    4.50
   1   7  -2   95.79    3.90
   1   7  -2   90.59    4.70
   1   7  -2   94.09    4.70
  -1  -7   2   93.29    4.80
  -1  -7   2   97.69    4.60
  -1  -7   2   89.09    6.30
  -1  -7   2   97.09    4.10
  -1  -7   2   94.49    4.10
   0   7  -2  304.27   10.90
   0   7  -2  318.77   11.10
   0   7  -2  302.57   11.00
   0   7  -2  325.97   10.60
   0   7  -2  313.47   11.00
   0   7  -2  311.17   11.60
   0   7  -2  328.37   11.10
   0   7  -2  313.87   11.20
   0  -7   2  325.77   10.80
   0  -7   2  308.87   11.50
   0  -7   2  326.87   11.40
   0  -7   2  326.07   11.70
   0  -7   2  320.67   10.80
  -1   7  -2   96.19    4.60
  -1   7  -2   97.89    4.50
  -1   7  -2   95.39    3.90
  -1   7  -2   97.39    4.90
  -1   7  -2   98.99    3.90
  -1   7  -2   98.79    5.00
  -1   7  -2   91.79    5.00
  -1   7  -2   90.79    5.40
   1  -7   2   85.79    4.30
   1  -7   2   95.69    6.00
   1  -7   2   97.99    4.60
   1  -7   2   97.39    4.20
  -2   7  -2   83.19    5.30
  -2   7  -2   88.69    3.90
  -2   7  -2   89.99    4.40
  -2   7  -2   85.99    4.20
  -2   7  -2   91.99    4.10
  -2   7  -2   78.89    4.80
  -2   7  -2   93.09    4.00
  -2   7  -2   85.79    5.30
   2  -7   2   98.49    7.00
   2  -7   2   91.99    4.50
   2  -7   2   85.39    4.50
   2  -7   2   86.79    7.60
   2  -7   2   91.29    5.30
  -3   7  -2   90.59    5.10
  -3   7  -2   80.49    3.90
  -3   7  -2   89.49    4.40
  -3   7  -2   83.89    5.90
  -3   7  -2   84.59    4.10
  -3   7  -2   81.99    4.70
  -3   7  -2   77.89    4.30
   3  -7   2   89.09    6.50
   3  -7   2   70.49    6.80
   3  -7   2   98.49    7.70
   3  -7   2   76.19    6.70
   3  -7   2   87.89    4.90
  -4   7  -2   68.79    3.90
  -4   7  -2   64.69    5.00
  -4   7  -2   69.09    4.30
  -4   7  -2   70.19    4.60
  -4   7  -2   67.69    4.10
   4  -7   2   66.89    6.50
   4  -7   2   59.59    5.50
   4  -7   2   75.89    6.20
  -5   7  -2   97.79    5.80
  -5   7  -2   94.29    6.50
  -5   7  -2  104.29    5.00
  -5   7  -2   97.59    4.80
  -5   7  -2  100.99    6.10
   5  -7   2  103.19    8.60
   5  -7   2  100.59    7.00
   5  -7   2  105.19    6.20
  -6   7  -2   40.00    4.40
  -6   7  -2   36.10    4.40
  -6   7  -2   32.70    4.10
  -6   7  -2   39.20    2.70
   6  -7   2   38.40    4.00
   6  -7   2   30.50    5.20
  -7   7  -2    8.40    3.10
  -7   7  -2    8.10    1.60
  -7   7  -2    4.50    2.70
   7  -7   2    8.00    2.40
   7   6  -2   33.70    2.30
   7   6  -2   34.60    4.40
   7   6  -2   31.30    3.10
   6   6  -2  227.68   10.20
   6   6  -2  215.58    9.90
   6   6  -2  241.28    9.20
   6   6  -2  238.78    9.00
  -6  -6   2  228.68    8.60
   5   6  -2   64.79    4.40
   5   6  -2   63.59    4.40
   5   6  -2   63.39    5.60
   5   6  -2   64.79    5.90
  -5  -6   2   58.59    3.80
   4   6  -2  138.49    8.10
   4   6  -2  137.99    6.30
   4   6  -2  144.79    6.40
   4   6  -2  145.49    6.10
   4   6  -2  132.99    7.40
   4   6  -2  152.08    7.80
  -4  -6   2  137.29    5.40
   3   6  -2  382.36   13.90
   3   6  -2  383.56   13.30
   3   6  -2  390.16   13.40
   3   6  -2  370.26   13.30
   3   6  -2  387.36   14.00
  -3  -6   2  392.26   12.60
  -3  -6   2  395.66   13.40
   2   6  -2  146.49    6.60
   2   6  -2  144.19    6.10
   2   6  -2  148.89    5.30
   2   6  -2  154.58    5.90
   2   6  -2  153.38    6.80
   2   6  -2  148.69    6.00
  -2  -6   2  134.49    5.90
  -2  -6   2  150.58    5.40
  -2  -6   2  156.18    5.60
  -2  -6   2  156.28    5.70
  -2  -6   2  161.18    6.10
  -2  -6   2  153.28    5.30
   1   6  -2  208.08    7.30
   1   6  -2  204.38    6.90
   1   6  -2  201.68    7.00
   1   6  -2  195.18    6.90
  -1  -6   2  208.68    7.50
  -1  -6   2  205.48    7.00
  -1  -6   2  192.68    7.40
  -1  -6   2  205.98    7.00
   0   6  -2   12.60    1.60
   0   6  -2   12.70    1.10
   0   6  -2   13.20    1.50
   0   6  -2   11.50    1.20
   0   6  -2   12.60    1.60
   0  -6   2   11.20    2.00
   0  -6   2   15.30    1.80
   0  -6   2   14.10    2.30
   0  -6   2   12.30    1.40
  -1   6  -2  734.43   24.00
  -1   6  -2  728.23   23.70
  -1   6  -2  741.43   23.70
  -1   6  -2  713.93   23.60
  -1   6  -2  733.23   23.80
   1  -6   2  759.22   23.80
   1  -6   2  756.42   24.40
   1  -6   2  757.12   24.80
   1  -6   2  763.82   23.80
  -2   6  -2   79.99    4.20
  -2   6  -2   85.49    3.60
  -2   6  -2   84.69    3.70
  -2   6  -2   80.09    3.60
  -2   6  -2   69.59    4.50
  -2   6  -2   85.59    3.80
   2  -6   2   83.99    3.90
   2  -6   2   73.69    4.90
   2  -6   2   82.89    3.80
   2  -6   2   80.49    3.80
   2  -6   2   80.09    6.80
  -3   6  -2   43.70    2.80
  -3   6  -2   44.00    3.40
  -3   6  -2   52.69    4.60
  -3   6  -2   45.80    2.80
  -3   6  -2   41.00    5.10
  -3   6  -2   41.40    3.70
  -3   6  -2   53.89    3.10
   3  -6   2   43.90    4.40
   3  -6   2   51.89    5.70
   3  -6   2   48.90    5.60
   3  -6   2   46.50    3.30
   3  -6   2   36.80    4.80
  -4   6  -2   30.40    2.90
  -4   6  -2   32.40    6.20
  -4   6  -2   34.30    3.40
  -4   6  -2   25.80    3.10
  -4   6  -2   30.50    2.80
  -5   6  -2  143.29    7.30
  -5   6  -2  158.28    7.30
  -5   6  -2  161.48    6.50
  -5   6  -2  158.18    6.30
   5  -6   2  150.08    8.30
   5  -6   2  154.98    7.40
   5  -6   2  163.18    8.90
  -6   6  -2   11.60    2.00
  -6   6  -2   15.00    4.40
  -6   6  -2   10.60    3.10
  -6   6  -2   10.20    2.20
   6  -6   2   14.30    3.50
   6  -6   2   11.80    2.90
   6  -6   2   12.70    3.50
  -7   6  -2   17.50    2.80
  -7   6  -2    9.50    3.10
  -7   6  -2   21.00    2.40
   7  -6   2   18.00    2.80
   7  -6   2   16.50    3.00
   7  -6   2   14.60    2.90
  -8   6  -2    0.60    1.50
  -8   6  -2    1.50    1.50
   8  -6   2    1.10    1.40
   8  -6   2    1.10    1.90
   8   5  -2    7.10    2.10
   8   5  -2    5.30    1.10
   7   5  -2   73.09    3.90
   7   5  -2   72.19    5.20
   7   5  -2   81.79    4.00
   6   5  -2   49.50    6.50
   6   5  -2   42.90    4.10
   6   5  -2   49.10    3.80
   6   5  -2   40.60    5.10
  -6  -5   2   35.20    3.60
   5   5  -2   30.80    4.20
   5   5  -2   33.20    5.50
   5   5  -2   36.80    3.40
   5   5  -2   40.60    5.20
  -5  -5   2   27.20    2.90
  -5  -5   2   35.70    5.10
   4   5  -2   32.50    5.40
   4   5  -2   36.10    5.00
   4   5  -2   33.40    2.80
   4   5  -2   39.80    4.80
   4   5  -2   37.40    3.10
   4   5  -2   35.20    3.60
  -4  -5   2   34.70    2.30
   3   5  -2    5.90    2.50
   3   5  -2    4.00    1.30
   3   5  -2    1.70    1.90
   3   5  -2    5.10    1.90
  -3  -5   2    6.00    1.30
  -3  -5   2    5.60    1.50
   2   5  -2 1975.10   64.39
   2   5  -2 2054.29   64.39
   2   5  -2 2093.79   65.09
  -2  -5   2 2108.99   64.69
  -2  -5   2 2138.19   64.49
  -2  -5   2 2030.20   64.49
  -2  -5   2 2142.89   64.79
  -2  -5   2 2082.39   65.19
   1   5  -2   14.00    1.30
   1   5  -2   12.60    1.50
   1   5  -2   11.70    1.10
   1   5  -2   10.50    1.10
   1   5  -2   11.60    1.10
  -1  -5   2   12.00    1.60
  -1  -5   2   11.70    1.20
  -1  -5   2   13.60    1.50
  -1  -5   2   11.90    1.20
   0   5  -2  132.69    4.90
   0   5  -2  129.89    4.60
   0   5  -2  131.59    4.70
   0   5  -2  133.19    4.80
   0   5  -2  137.29    4.60
   0   5  -2  131.39    4.90
   0  -5   2  131.99    4.60
   0  -5   2  131.89    4.80
   0  -5   2  136.99    4.70
   0  -5   2  129.29    5.10
   0  -5   2  133.69    5.10
  -1   5  -2  172.48    5.90
  -1   5  -2  162.18    5.90
  -1   5  -2  161.28    5.70
  -1   5  -2  170.78    6.20
  -1   5  -2  189.88    6.00
  -1   5  -2  161.28    5.90
   1  -5   2  170.68    6.00
   1  -5   2  172.28    6.30
   1  -5   2  169.88    6.00
   1  -5   2  172.78    6.00
   1  -5   2  172.28    6.40
  -2   5  -2  264.37    8.80
  -2   5  -2  250.87    8.70
  -2   5  -2  248.68    8.50
  -2   5  -2  241.68    8.60
   2  -5   2  239.28    8.60
   2  -5   2  252.97    8.60
   2  -5   2  255.77    8.80
   2  -5   2  249.08    9.20
   2  -5   2  251.77    8.70
  -3   5  -2   77.99    3.40
  -3   5  -2   72.29    4.20
  -3   5  -2   82.09    3.60
  -3   5  -2   61.99    3.40
  -3   5  -2   77.39    3.80
  -3   5  -2   71.69    4.30
   3  -5   2   78.99    3.80
   3  -5   2   78.09    3.80
   3  -5   2   83.39    4.10
   3  -5   2   65.99    5.20
   3  -5   2   69.89    6.20
   3  -5   2   69.49    5.70
  -4   5  -2   26.70    2.90
  -4   5  -2   25.90    2.50
  -4   5  -2   22.00    3.00
  -4   5  -2   25.50    2.60
  -4   5  -2   24.70    3.80
   4  -5   2   19.30    3.60
   4  -5   2   22.80    4.20
   4  -5   2   23.30    3.90
  -5   5  -2   29.90    2.70
  -5   5  -2   19.40    3.80
  -5   5  -2   26.80    3.20
  -5   5  -2   25.90    3.70
  -5   5  -2   24.90    4.10
   5  -5   2   31.20    4.90
   5  -5   2   22.30    3.70
   5  -5   2   23.90    5.00
  -6   5  -2   -1.10    3.50
  -6   5  -2    0.30    1.90
  -6   5  -2    2.00    4.10
  -6   5  -2    3.20    3.00
   6  -5   2   -0.50    3.60
   6  -5   2    2.50    2.60
   6  -5   2    5.80    3.10
   6  -5   2    2.30    3.20
  -7   5  -2   48.20    4.00
  -7   5  -2   40.60    4.60
  -7   5  -2   50.09    3.10
   7  -5   2   44.90    3.70
   7  -5   2   50.49    4.50
   7  -5   2   50.99    3.10
   7  -5   2   43.10    5.10
  -8   5  -2   -1.50    1.50
   8  -5   2    1.50    1.10
   8  -5   2    1.90    3.30
   8   4  -2   58.99    4.20
   8   4  -2   68.29    3.40
   7   4  -2    4.50    3.20
   7   4  -2    8.10    2.70
   6   4  -2   11.50    3.30
   6   4  -2   12.70    2.60
   6   4  -2   10.50    2.20
  -6  -4   2   13.30    2.20
   5   4  -2   46.00    4.90
   5   4  -2   32.70    3.90
   5   4  -2   38.40    3.90
  -5  -4   2   41.30    4.50
  -5  -4   2   34.10    2.80
   4   4  -2   62.29    5.60
   4   4  -2   63.29    5.60
   4   4  -2   60.69    3.80
   4   4  -2   68.09    4.30
  -4  -4   2   63.89    4.20
   3   4  -2 1015.50   32.40
  -3  -4   2 1023.40   32.20
  -3  -4   2 1007.90   32.10
   2   4  -2  281.97    9.00
   2   4  -2  283.07    9.00
   2   4  -2  295.57    9.70
  -2  -4   2  280.17    9.00
  -2  -4   2  293.57    9.20
  -2  -4   2  289.87    9.40
  -2  -4   2  297.87    9.10
  -2  -4   2  293.87    9.70
  -2  -4   2  268.77    9.00
   1   4  -2  328.87   10.70
   1   4  -2  308.57   10.40
   1   4  -2  324.57   10.60
   1   4  -2  317.97   10.30
  -1  -4   2  327.47   10.70
  -1  -4   2  302.27   10.30
  -1  -4   2  333.37   10.50
  -1  -4   2  347.37   10.20
  -1  -4   2  331.67   10.30
  -1  -4   2  312.07   10.10
   0   4  -2  159.58    5.60
   0   4  -2  155.18    5.50
   0   4  -2  169.68    5.60
   0   4  -2  163.58    5.70
   0   4  -2  156.38    5.40
   0  -4   2  173.78    5.80
   0  -4   2  167.98    5.50
   0  -4   2  165.78    5.40
   0  -4   2  158.68    5.60
   0  -4   2  163.68    5.50
   0  -4   2  175.28    5.90
  -1   4  -2 1008.50   31.10
  -1   4  -2  985.60   31.20
  -1   4  -2  998.70   31.00
  -1   4  -2  961.60   30.90
  -1   4  -2  943.11   30.90
  -1   4  -2  983.40   31.00
   1  -4   2 1066.69   31.30
   1  -4   2  969.80   30.90
   1  -4   2  993.30   31.00
   1  -4   2  987.10   31.00
   1  -4   2  962.90   31.10
   1  -4   2  989.30   31.20
  -2   4  -2  478.85   15.70
  -2   4  -2  485.25   15.80
  -2   4  -2  478.35   15.10
  -2   4  -2  495.45   15.60
  -2   4  -2  475.85   15.40
  -2   4  -2  471.65   16.10
  -2   4  -2  479.35   15.70
   2  -4   2  486.85   15.70
   2  -4   2  477.15   15.50
   2  -4   2  461.65   15.50
   2  -4   2  483.45   16.00
   2  -4   2  497.45   15.60
  -3   4  -2   93.99    4.30
  -3   4  -2  100.09    4.40
  -3   4  -2   96.99    3.90
  -3   4  -2   94.29    3.90
  -3   4  -2   90.79    4.60
  -3   4  -2   90.99    4.20
   3  -4   2   96.39    4.30
   3  -4   2   94.79    4.20
   3  -4   2   97.79    3.90
   3  -4   2   95.19    4.10
  -4   4  -2    2.50    1.30
  -4   4  -2    0.10    2.20
  -4   4  -2    3.50    1.60
  -4   4  -2    2.50    1.50
  -4   4  -2    5.30    2.10
  -4   4  -2    2.50    2.60
   4  -4   2    4.00    2.90
   4  -4   2    1.80    3.00
   4  -4   2    1.40    2.20
   4  -4   2    1.20    3.70
   4  -4   2    4.60    2.40
  -5   4  -2   94.69    4.50
  -5   4  -2   94.69    5.50
  -5   4  -2   95.09    4.40
   5  -4   2   96.39    6.40
   5  -4   2   87.39    5.20
   5  -4   2   92.49    7.30
  -6   4  -2   92.49    4.40
  -6   4  -2   82.89    6.10
  -6   4  -2   84.09    6.90
  -6   4  -2   76.39    6.80
  -6   4  -2   89.79    4.40
   6  -4   2   88.19    6.60
   6  -4   2   94.09    5.20
   6  -4   2   87.29    6.30
  -7   4  -2   36.50    4.60
  -7   4  -2   36.40    3.70
  -7   4  -2   41.60    3.00
   7  -4   2   38.00    4.40
   7  -4   2   38.40    2.80
   7  -4   2   36.70    4.90
  -8   4  -2   -0.70    2.70
  -8   4  -2    1.50    1.80
   8  -4   2    1.30    2.10
   8  -4   2    2.30    1.10
   8  -4   2    4.80    4.20
   8   3  -2   18.80    3.40
   8   3  -2   22.80    2.50
   7   3  -2    2.40    1.70
   7   3  -2    4.00    3.20
  -7  -3   2    2.80    2.40
   6   3  -2  136.49    6.70
   6   3  -2  146.39    6.40
   6   3  -2  143.89    7.50
  -6  -3   2  134.99    5.80
   5   3  -2  227.48   11.50
   5   3  -2  239.08    9.30
  -5  -3   2  229.78    9.60
  -5  -3   2  235.28    8.00
   4   3  -2   90.69    5.10
   4   3  -2   79.79    5.60
   4   3  -2   87.29    4.50
  -4  -3   2   88.79    4.50
  -4  -3   2  100.89    4.70
   3   3  -2 1810.92   55.49
  -3  -3   2 1723.03   55.19
  -3  -3   2 1769.32   55.19
   2   3  -2  256.47    8.40
   2   3  -2  260.87    8.60
  -2  -3   2  247.08    7.90
  -2  -3   2  246.88    8.20
  -2  -3   2  245.78    7.80
   1   3  -2 1379.86   42.90
   1   3  -2 1367.66   42.70
   1   3  -2 1418.66   43.00
  -1  -3   2 1327.17   42.60
   0   3  -2  583.34   18.30
   0   3  -2  570.84   18.20
   0   3  -2  597.04   18.40
   0   3  -2  578.64   18.40
   0   3  -2  583.44   18.20
   0  -3   2  609.04   18.30
   0  -3   2  564.44   18.30
   0  -3   2  571.64   18.40
   0  -3   2  581.64   18.30
   0  -3   2  578.14   18.20
  -1   3  -2 3812.62  118.09
  -2   3  -2 1872.81   54.59
  -2   3  -2 1739.13   54.29
  -2   3  -2 1727.43   54.59
  -2   3  -2 1750.12   54.89
  -2   3  -2 1689.93   54.19
   2  -3   2 1752.32   54.29
   2  -3   2 1730.13   54.49
   2  -3   2 1721.73   54.59
   2  -3   2 1739.53   54.29
   2  -3   2 1680.83   54.29
   2  -3   2 1751.82   54.29
  -3   3  -2  115.69    4.40
  -3   3  -2  114.49    4.80
  -3   3  -2  107.29    4.90
  -3   3  -2  100.09    4.20
   3  -3   2  104.89    4.30
   3  -3   2  105.09    4.70
   3  -3   2  108.79    4.30
   3  -3   2  105.89    4.00
   3  -3   2  108.29    4.50
  -4   3  -2  157.08    7.10
  -4   3  -2  150.28    6.40
  -4   3  -2  161.98    5.70
  -4   3  -2  157.98    5.60
  -4   3  -2  153.38    6.70
   4  -3   2  133.69    6.40
   4  -3   2  137.79    9.70
   4  -3   2  139.59    7.50
   4  -3   2  142.89    7.60
   4  -3   2  156.68    7.80
   4  -3   2  148.49    6.30
  -5   3  -2  146.89    7.90
  -5   3  -2  144.29    6.10
  -5   3  -2  158.98    7.40
  -5   3  -2  149.29    6.00
  -5   3  -2  149.09    8.10
   5  -3   2  157.18    7.90
  -6   3  -2   99.19    5.00
  -6   3  -2  104.09    7.10
  -6   3  -2  106.59    5.10
   6  -3   2  100.39    7.40
   6  -3   2   99.59    6.60
   6  -3   2  104.99    5.40
  -7   3  -2   14.30    4.30
  -7   3  -2   17.20    3.00
  -7   3  -2   15.50    2.60
   7  -3   2    8.80    2.90
  -8   3  -2   67.29    4.50
  -8   3  -2   64.99    3.80
   8  -3   2   61.59    3.70
   8  -3   2   61.39    3.30
   8   2  -2    1.00    1.00
   8   2  -2    1.30    2.30
  -8  -2   2    3.40    3.50
   7   2  -2    4.70    3.00
   7   2  -2    4.60    1.90
   7   2  -2   14.80    4.50
  -7  -2   2    5.10    2.20
   6   2  -2  177.68    7.70
   6   2  -2  170.08    8.50
   6   2  -2  167.08    8.30
  -6  -2   2  172.28    7.40
   5   2  -2  585.94   19.80
   5   2  -2  584.64   21.70
   5   2  -2  572.74   20.30
   5   2  -2  590.84   19.70
  -5  -2   2  584.34   19.80
  -5  -2   2  590.44   18.70
   4   2  -2   74.69    4.90
   4   2  -2   74.99    5.20
  -4  -2   2   82.49    4.00
  -4  -2   2   72.69    3.70
   3   2  -2   34.20    1.80
  -3  -2   2   34.90    2.00
   2   2  -2    0.30    0.50
   2   2  -2    0.00    0.40
  -2  -2   2    0.50    0.50
   1   2  -2  598.14   18.80
   1   2  -2  596.44   18.70
  -1  -2   2  572.84   18.50
  -1  -2   2  606.44   18.50
   0   2  -2   77.29    2.80
   0   2  -2   82.49    2.80
   0   2  -2   82.89    3.30
   0   2  -2   89.09    2.90
   0   2  -2   85.99    3.10
   0   2  -2   89.49    3.00
   0  -2   2   84.99    2.90
   0  -2   2   88.89    2.90
   0  -2   2   91.39    3.00
   0  -2   2   83.29    2.90
  -1   2  -2 1590.84   49.20
  -1   2  -2 1581.34   49.40
  -1   2  -2 1647.04   49.00
  -1   2  -2 1462.15   49.00
   1  -2   2 1554.84   49.10
   1  -2   2 1632.54   49.20
  -2   2  -2 5267.57  169.88
   2  -2   2 4945.91  168.88
  -3   2  -2  602.44   20.50
  -3   2  -2  661.53   21.20
  -3   2  -2  633.04   20.50
  -3   2  -2  661.43   20.60
  -3   2  -2  635.84   20.90
   3  -2   2  645.14   20.90
   3  -2   2  654.23   20.70
   3  -2   2  673.63   21.20
   3  -2   2  630.74   20.50
  -4   2  -2  128.09    4.80
  -4   2  -2  130.29    5.80
  -4   2  -2  123.69    6.20
  -4   2  -2  122.09    4.90
  -4   2  -2  126.59    5.30
   4  -2   2  122.79    7.20
   4  -2   2  128.99    5.60
   4  -2   2  120.99    6.70
   4  -2   2  124.09    5.30
   4  -2   2  120.89    6.70
  -5   2  -2   30.60    2.90
  -5   2  -2   25.70    4.30
  -5   2  -2   33.50    2.70
   5  -2   2   32.50    3.60
  -6   2  -2   -3.50    3.50
  -6   2  -2    0.20    1.60
  -6   2  -2    1.40    1.90
   6  -2   2   -2.10    2.30
   6  -2   2    1.10    2.00
   6  -2   2   -3.10    2.60
   6  -2   2    2.10    3.20
  -7   2  -2   -0.20    1.70
  -7   2  -2    1.20    2.10
   7  -2   2    0.30    2.20
   7  -2   2   -0.10    3.70
   7  -2   2   -0.10    2.60
  -8   2  -2    3.80    2.20
  -8   2  -2    2.00    2.40
  -8   2  -2    0.40    2.10
   8  -2   2    1.90    2.30
   8  -2   2    3.30    1.10
   8   1  -2   56.09    3.00
   8   1  -2   55.69    3.90
  -8  -1   2   56.19    5.20
  -8  -1   2   54.99    5.00
   7   1  -2   45.10    5.30
   7   1  -2   40.60    3.70
  -7  -1   2   48.20    8.80
  -7  -1   2   40.10    3.60
  -7  -1   2   51.19    4.80
   6   1  -2   84.79    6.00
   6   1  -2   85.69    5.00
   6   1  -2   82.99    6.10
   6   1  -2   60.69    8.00
  -6  -1   2   72.59    6.20
   5   1  -2   15.90    4.10
   5   1  -2   11.70    2.20
   5   1  -2   10.30    3.60
   5   1  -2   13.00    3.90
   5   1  -2   13.90    2.80
  -5  -1   2    9.20    1.50
   4   1  -2    4.00    3.40
  -4  -1   2    2.20    1.20
   3   1  -2   12.10    1.30
  -3  -1   2   14.20    0.60
  -3  -1   2   13.10    1.30
  -3  -1   2   13.60    1.30
   2   1  -2  897.61   27.80
   2   1  -2  874.81   27.70
  -2  -1   2  875.61   27.70
   1   1  -2  576.54   19.60
   1   1  -2  586.14   19.50
  -1  -1   2  650.63   20.00
  -1  -1   2  716.13   19.90
  -1  -1   2  585.64   19.50
   0   1  -2  914.81   29.30
   0  -1   2  955.70   29.10
   0  -1   2  933.41   29.10
  -1   1  -2 5542.85  178.58
   1  -1   2 5594.74  178.68
  -2   1  -2 3229.88   99.29
   2  -1   2 2475.85   97.49
  -3   1  -2  193.88    6.80
  -3   1  -2  174.28    6.10
  -3   1  -2  177.08    6.10
  -3   1  -2  165.18    6.20
  -3   1  -2  182.08    6.40
   3  -1   2  172.38    6.40
   3  -1   2  178.18    6.20
   3  -1   2  174.58    6.10
  -4   1  -2   24.90    2.40
  -4   1  -2   26.40    2.20
  -4   1  -2   27.40    3.10
  -4   1  -2   23.30    3.10
  -4   1  -2   27.70    2.60
   4  -1   2   32.00    4.20
   4  -1   2   30.20    2.50
   4  -1   2   28.70    3.50
   4  -1   2   30.40    4.30
   4  -1   2   22.50    3.90
  -5   1  -2  225.58   10.30
  -5   1  -2  228.58    8.40
  -5   1  -2  242.08    8.40
   5  -1   2  245.28   10.00
   5  -1   2  228.88    8.60
  -6   1  -2  119.19    5.20
  -6   1  -2  113.59    4.90
  -6   1  -2  107.49    7.50
   6  -1   2  112.49    7.20
   6  -1   2  114.39    6.30
   6  -1   2  106.59    5.00
   6  -1   2  108.69    6.90
  -7   1  -2   54.09    3.90
  -7   1  -2   51.29    3.60
   7  -1   2   59.99    4.60
   7  -1   2   52.19    4.40
  -8   1  -2    2.70    2.30
   8  -1   2    3.90    1.10
   8  -1   2    5.80    1.80
   8   0  -2    0.20    2.50
  -8   0   2    3.90    2.60
  -8   0   2    2.90    3.20
   7   0  -2    3.70    2.00
   7   0  -2    6.70    3.30
   7   0  -2    6.20    5.20
  -7   0   2    6.90    2.80
  -7   0   2    5.20    5.50
  -7   0   2    2.00    2.10
   6   0  -2   37.80    6.70
   6   0  -2   36.60    5.10
   6   0  -2   45.80    5.40
   6   0  -2   49.00    4.90
  -6   0   2   38.00    3.60
  -6   0   2   37.60    5.10
   5   0  -2   66.69    6.40
   5   0  -2   67.79    5.10
   5   0  -2   59.09    5.20
   5   0  -2   62.29    5.00
   5   0  -2   61.59    5.70
  -5   0   2   62.19    3.20
  -5   0   2   66.79    4.90
   4   0  -2  191.58    7.10
  -4   0   2  196.98    6.50
  -4   0   2  180.28    6.70
  -4   0   2  194.18    7.00
  -4   0   2  207.78    6.40
   3   0  -2  360.16   11.80
   3   0  -2  359.26   11.30
   3   0  -2  352.36   11.40
  -3   0   2  377.96   11.40
  -3   0   2  365.06   11.50
  -3   0   2  349.27   11.60
  -3   0   2  355.96   11.80
   2   0  -2   79.49    3.00
   2   0  -2   79.49    2.70
   2   0  -2   76.79    2.90
  -2   0   2   79.99    2.70
  -2   0   2   79.09    2.90
  -2   0   2   83.49    2.70
  -2   0   2   81.89    2.70
   1   0  -2  691.93   21.30
   1   0  -2  683.83   21.40
  -1   0   2  674.13   21.30
  -1   0   2  694.33   21.30
  -1   0   2  663.13   21.30
   0   0  -2    0.20    0.20
   0   0  -2    0.60    0.30
   0   0  -2    0.20    0.50
   0   0  -2    0.40    0.30
   0   0   2    0.40    0.20
   0   0   2    0.50    0.30
   0   0   2    0.40    0.30
   0   0   2    0.20    0.20
   0   0   2    0.50    0.20
  -1   0  -2 2138.69   72.79
   1   0   2 2147.19   72.69
  -2   0  -2 4033.40  133.29
   2   0   2 3951.90  133.19
  -3   0  -2  202.48    6.80
  -3   0  -2  206.38    7.10
  -3   0  -2  207.38    7.50
   3   0   2  191.48    6.80
   3   0   2  196.48    6.80
   3   0   2  202.48    7.10
  -4   0  -2   40.40    3.30
  -4   0  -2   45.40    2.50
  -4   0  -2   40.70    3.00
  -4   0  -2   47.10    3.80
   4   0   2   45.40    3.20
   4   0   2   47.10    4.40
   4   0   2   41.10    4.90
   4   0   2   43.10    2.90
  -5   0  -2    9.40    1.80
  -5   0  -2   12.50    3.10
  -5   0  -2   12.50    2.20
   5   0   2   11.40    3.30
   5   0   2   11.40    2.20
   5   0   2    7.20    3.00
  -6   0  -2  135.09    5.80
  -6   0  -2  141.69    5.80
   6   0   2  141.19    6.90
   6   0   2  131.79    8.00
   6   0   2  133.89    5.70
   6   0   2  136.49    7.00
   6   0   2  146.39    7.80
   6   0   2  136.59    7.70
  -7   0  -2   53.79    3.30
  -7   0  -2   61.89    4.00
   7   0   2   54.19    4.30
   7   0   2   60.69    5.70
   7   0   2   44.10    7.40
  -8   0  -2   56.19    4.70
  -8   0  -2   58.09    3.30
   8   0   2   61.59    3.00
   8   0   2   56.69    3.50
   8  -1  -2   -1.30    1.50
   8  -1  -2    1.70    1.70
  -8   1   2    2.30    2.20
  -8   1   2    1.70    2.10
   7  -1  -2   10.60    4.80
   7  -1  -2   16.90    3.40
   7  -1  -2   20.80    3.70
   7  -1  -2   15.00    3.50
  -7   1   2   13.40    2.20
  -7   1   2   15.50    2.50
  -7   1   2   25.60    5.20
   6  -1  -2  156.88    7.20
   6  -1  -2  144.89    8.70
   6  -1  -2  150.48    8.90
   6  -1  -2  153.18    7.90
   6  -1  -2  149.49    7.70
  -6   1   2  146.19    6.30
  -6   1   2  149.09    7.80
  -6   1   2  157.78    5.90
   5  -1  -2   49.80    7.00
   5  -1  -2   50.19    5.10
   5  -1  -2   75.59    6.10
   5  -1  -2   64.99    5.10
   5  -1  -2   64.19    6.10
  -5   1   2   62.89    4.30
  -5   1   2   61.29    3.30
   4  -1  -2   23.80    2.40
  -4   1   2   28.00    1.70
  -4   1   2   27.00    1.90
  -4   1   2   28.40    2.60
  -4   1   2   25.40    1.90
   3  -1  -2   14.40    1.40
   3  -1  -2   15.10    1.50
  -3   1   2   17.40    1.40
  -3   1   2   13.70    1.60
  -3   1   2   16.10    1.10
  -3   1   2   16.10    1.30
   2  -1  -2 1108.49   35.50
   2  -1  -2 1142.79   35.70
   2  -1  -2 1152.78   35.90
   2  -1  -2 1122.49   35.50
   2  -1  -2 1135.79   35.70
  -2   1   2 1186.68   35.50
  -2   1   2 1157.98   35.60
  -2   1   2 1124.99   35.70
  -2   1   2 1140.99   35.80
   1  -1  -2   78.79    2.70
   1  -1  -2   73.59    3.00
   1  -1  -2   76.59    2.50
   1  -1  -2   77.89    2.70
   1  -1  -2   75.99    2.60
  -1   1   2   76.89    2.70
  -1   1   2   76.89    2.80
  -1   1   2   78.99    2.70
  -1   1   2   76.29    2.80
  -1   1   2   77.79    2.70
   0  -1  -2 1661.93   56.49
   0   1   2 1574.34   55.89
  -1  -1  -2 2119.79   65.69
  -2  -1  -2   24.50    1.90
  -2  -1  -2   26.10    1.30
  -2  -1  -2   23.60    1.40
  -2  -1  -2   26.20    1.50
   2   1   2   26.00    1.10
   2   1   2   25.10    1.30
   2   1   2   25.20    1.40
  -3  -1  -2  182.18    6.50
  -3  -1  -2  184.18    6.20
  -3  -1  -2  173.58    6.10
  -3  -1  -2  186.88    7.00
   3   1   2  179.38    6.50
   3   1   2  176.78    6.10
   3   1   2  176.58    6.00
  -4  -1  -2    1.00    1.60
  -4  -1  -2   -0.10    1.40
  -4  -1  -2    1.30    1.80
  -4  -1  -2    0.50    1.20
   4   1   2    1.10    2.20
   4   1   2   -0.30    1.20
   4   1   2    0.20    2.40
   4   1   2   -3.10    1.90
   4   1   2    1.20    2.40
  -5  -1  -2  198.48    7.00
  -5  -1  -2  177.58    8.80
  -5  -1  -2  178.28    7.00
   5   1   2  190.68    8.30
   5   1   2  196.38    8.70
   5   1   2  190.28    7.90
   5   1   2  186.08    7.20
   5   1   2  184.88    8.50
  -6  -1  -2   28.70    3.20
  -6  -1  -2   13.50    6.80
  -6  -1  -2   27.80    2.90
   6   1   2   39.40    5.10
   6   1   2   25.10    3.40
   6   1   2   30.50    4.30
   6   1   2   27.10    3.90
   6   1   2   22.00    3.40
  -7  -1  -2   40.80    3.80
  -7  -1  -2   32.80    2.70
  -8  -1  -2   87.79    4.00
   8   1   2   81.09    4.30
   8   1   2   90.49    4.10
   8   1   2   83.19    5.70
   8  -2  -2   64.09    4.80
   8  -2  -2   65.79    3.90
  -8   2   2   66.49    3.80
  -8   2   2   57.39    4.80
   7  -2  -2  254.97   12.70
   7  -2  -2  279.67   10.40
   7  -2  -2  275.47   11.60
   7  -2  -2  278.87   11.20
  -7   2   2  235.68   12.60
  -7   2   2  275.77    9.70
  -7   2   2  261.67   11.30
  -7   2   2  269.97    9.80
   6  -2  -2  380.46   14.70
   6  -2  -2  387.26   14.60
   6  -2  -2  372.76   13.90
   6  -2  -2  372.56   15.30
   6  -2  -2  364.16   13.10
   6  -2  -2  375.56   15.10
  -6   2   2  376.86   13.00
  -6   2   2  383.46   14.30
  -6   2   2  392.36   12.90
   5  -2  -2  454.65   16.50
   5  -2  -2  458.55   17.50
   5  -2  -2  439.56   15.70
   5  -2  -2  450.95   17.00
   5  -2  -2  456.05   17.10
  -5   2   2  479.35   16.20
  -5   2   2  472.65   15.20
  -5   2   2  450.55   15.20
   4  -2  -2   63.29    5.30
   4  -2  -2   58.69    5.90
   4  -2  -2   66.69    4.70
   4  -2  -2   62.19    3.90
   4  -2  -2   62.49    3.50
   4  -2  -2   62.99    5.70
  -4   2   2   63.09    3.20
  -4   2   2   66.49    3.20
  -4   2   2   66.79    3.70
  -4   2   2   63.29    3.30
  -4   2   2   61.99    3.00
   3  -2  -2  147.29    5.50
   3  -2  -2  140.69    4.90
   3  -2  -2  136.29    5.20
   3  -2  -2  141.29    5.30
  -3   2   2  143.09    5.10
  -3   2   2  142.09    5.40
  -3   2   2  146.79    5.00
  -3   2   2  139.59    5.40
   2  -2  -2  213.48    7.10
   2  -2  -2  230.98    7.60
   2  -2  -2  236.48    7.10
   2  -2  -2  233.98    7.60
   2  -2  -2  227.58    7.40
   2  -2  -2  233.98    7.80
  -2   2   2  210.88    7.40
  -2   2   2  224.28    7.70
  -2   2   2  226.98    7.40
  -2   2   2  222.48    7.70
  -2   2   2  229.58    7.50
   1  -2  -2   53.49    2.10
   1  -2  -2   54.29    2.10
   1  -2  -2   52.99    2.40
   1  -2  -2   55.19    2.20
  -1   2   2   56.09    2.10
  -1   2   2   55.09    2.20
  -1   2   2   50.89    2.20
  -1   2   2   52.59    2.10
   0  -2  -2   93.39    3.20
   0  -2  -2   93.39    3.00
   0  -2  -2   86.79    3.30
   0  -2  -2   92.39    3.50
   0   2   2   90.39    3.30
   0   2   2   96.59    3.20
   0   2   2   93.09    3.20
   0   2   2   90.09    3.20
  -1  -2  -2  602.54   18.60
  -1  -2  -2  587.24   18.70
  -1  -2  -2  614.84   18.60
  -1  -2  -2  579.24   18.60
   1   2   2  596.24   18.70
   1   2   2  582.04   18.60
   1   2   2  598.04   18.50
   1   2   2  572.74   18.50
   1   2   2  592.94   18.70
   1   2   2  577.04   18.60
  -2  -2  -2  361.06   11.80
  -2  -2  -2  369.56   12.40
  -2  -2  -2  372.46   11.90
  -2  -2  -2  357.46   11.80
  -2  -2  -2  384.06   11.90
   2   2   2  362.46   11.90
   2   2   2  365.96   11.80
   2   2   2  374.06   11.80
   2   2   2  368.36   11.80
  -3  -2  -2   13.50    1.40
  -3  -2  -2   14.60    1.60
  -3  -2  -2   14.30    2.20
  -3  -2  -2   10.90    1.80
  -3  -2  -2   11.30    2.10
   3   2   2   11.60    1.50
   3   2   2   15.00    1.60
   3   2   2   14.80    1.80
  -4  -2  -2    3.60    2.00
  -4  -2  -2    1.80    1.30
  -4  -2  -2    3.10    1.90
  -4  -2  -2    0.70    1.60
   4   2   2    2.80    2.60
   4   2   2    5.60    1.80
   4   2   2    5.10    2.10
   4   2   2    3.50    2.20
   4   2   2    3.90    1.80
  -5  -2  -2   14.60    2.70
  -5  -2  -2   17.30    3.60
  -5  -2  -2   15.50    2.40
   5   2   2   14.60    2.60
   5   2   2   15.20    2.70
   5   2   2   15.40    2.40
   5   2   2   13.40    2.60
   5   2   2   15.20    3.30
  -6  -2  -2   86.19   10.20
  -6  -2  -2   93.89    4.60
   6   2   2  103.09    5.50
   6   2   2   93.09    5.70
   6   2   2   99.79    5.70
   6   2   2  102.89    6.70
  -7  -2  -2   16.60    2.70
  -7  -2  -2   20.60    2.40
   7   2   2   26.40    3.80
   7   2   2   16.30    3.10
   7   2   2   23.80    3.20
  -8  -2  -2    5.80    2.00
   8   2   2    1.80    2.10
   8   2   2    3.30    1.30
   8   2   2    2.10    2.10
   8  -3  -2    5.50    2.30
   8  -3  -2    9.00    1.90
  -8   3   2    7.80    1.80
  -8   3   2    3.60    2.30
   7  -3  -2   43.70    4.50
   7  -3  -2   44.60    5.00
   7  -3  -2   50.79    7.30
  -7   3   2   47.40    3.80
  -7   3   2   41.20    3.10
  -7   3   2   40.90    5.70
   6  -3  -2   -4.60    3.10
   6  -3  -2    2.20    3.00
   6  -3  -2    5.40    2.60
   6  -3  -2    7.50    4.00
   6  -3  -2    1.90    3.50
  -6   3   2   -0.60    1.60
  -6   3   2    5.10    2.80
  -6   3   2   -1.20    1.80
  -6   3   2    2.90    3.20
   5  -3  -2   56.49    6.60
   5  -3  -2   69.39    5.10
   5  -3  -2   56.89    6.50
   5  -3  -2   62.29    5.40
  -5   3   2   67.19    3.80
  -5   3   2   63.79    5.00
  -5   3   2   65.79    4.30
  -5   3   2   70.89    3.70
   4  -3  -2   80.09    5.70
   4  -3  -2   70.69    5.50
   4  -3  -2   62.59    4.50
   4  -3  -2   71.59    4.10
   4  -3  -2   55.09    6.70
   4  -3  -2   75.49    4.90
  -4   3   2   74.39    3.30
  -4   3   2   77.39    4.00
  -4   3   2   67.79    3.50
  -4   3   2   74.49    3.70
  -4   3   2   74.29    3.90
   3  -3  -2   52.29    3.20
   3  -3  -2   59.09    2.60
   3  -3  -2   59.59    2.80
   3  -3  -2   56.39    3.10
  -3   3   2   56.39    2.60
  -3   3   2   55.79    2.90
  -3   3   2   51.49    3.00
  -3   3   2   58.49    2.80
  -3   3   2   56.79    2.60
   2  -3  -2   46.80    2.20
   2  -3  -2   49.10    2.10
   2  -3  -2   41.30    3.40
   2  -3  -2   51.29    2.60
  -2   3   2   47.90    2.30
  -2   3   2   47.60    2.40
  -2   3   2   48.70    2.40
  -2   3   2   46.80    2.20
   1  -3  -2 1266.07   39.20
   1  -3  -2 1238.48   39.10
   1  -3  -2 1229.68   39.20
   1  -3  -2 1296.97   39.50
  -1   3   2 1244.38   39.20
  -1   3   2 1164.68   39.10
  -1   3   2 1311.67   39.20
  -1   3   2 1248.78   39.30
  -1   3   2 1245.68   39.10
  -1   3   2 1292.27   39.20
   0  -3  -2  761.92   23.20
   0  -3  -2  738.03   22.80
   0  -3  -2  748.93   23.40
   0  -3  -2  738.03   23.10
   0  -3  -2  733.93   23.10
   0   3   2  705.33   23.10
   0   3   2  741.23   23.00
   0   3   2  726.53   23.10
   0   3   2  705.03   23.10
   0   3   2  725.93   23.10
  -1  -3  -2   47.80    2.20
  -1  -3  -2   54.29    2.30
  -1  -3  -2   49.90    2.30
   1   3   2   51.39    2.10
   1   3   2   53.79    2.20
   1   3   2   53.69    1.90
   1   3   2   50.29    2.20
   1   3   2   52.79    2.30
   1   3   2   52.29    2.00
  -2  -3  -2  572.34   17.90
  -2  -3  -2  571.94   17.90
  -2  -3  -2  569.74   18.50
  -2  -3  -2  546.55   17.90
   2   3   2  568.44   18.10
   2   3   2  544.75   17.80
   2   3   2  545.95   17.70
  -3  -3  -2   84.49    4.40
  -3  -3  -2   84.39    3.40
  -3  -3  -2   82.69    3.70
  -3  -3  -2   88.79    3.80
  -3  -3  -2   78.09    3.50
   3   3   2   82.09    4.70
   3   3   2   88.49    4.50
   3   3   2   79.49    3.70
  -4  -3  -2   68.89    4.60
  -4  -3  -2   54.59    4.40
  -4  -3  -2   62.29    3.20
  -4  -3  -2   62.19    3.10
   4   3   2   56.69    4.10
   4   3   2   62.89    4.70
   4   3   2   63.39    3.60
   4   3   2   62.29    5.20
   4   3   2   62.39    3.90
  -5  -3  -2   18.00    3.30
  -5  -3  -2   20.40    2.90
  -5  -3  -2   21.20    4.10
   5   3   2   20.10    3.30
   5   3   2   13.90    2.20
   5   3   2   19.10    4.30
   5   3   2   15.20    2.70
   5   3   2   20.10    3.70
   5   3   2   24.20    3.60
  -6  -3  -2  162.88    6.80
  -6  -3  -2  171.38    6.90
  -6  -3  -2  158.88   12.30
   6   3   2  179.78    7.80
   6   3   2  170.58    7.60
   6   3   2  171.08    7.40
   6   3   2  180.38    7.90
  -7  -3  -2   28.80    3.80
  -7  -3  -2   35.10    2.80
   7   3   2   36.70    3.30
   7   3   2   40.50    2.80
   7   3   2   36.10    3.60
   8   3   2    2.30    1.90
   8   3   2   -1.40    1.30
   8   3   2    0.60    1.50
   8  -4  -2   40.70    3.20
   8  -4  -2   46.00    3.40
  -8   4   2   42.50    4.10
  -8   4   2   42.00    3.00
   7  -4  -2   31.10    4.30
   7  -4  -2   37.70    3.80
   7  -4  -2   39.20    6.80
  -7   4   2   40.80    3.10
  -7   4   2   38.60    4.20
  -7   4   2   34.40    3.20
   6  -4  -2   65.89    5.20
   6  -4  -2   84.49    7.70
   6  -4  -2   83.09    6.30
   6  -4  -2   79.19    6.30
   6  -4  -2   68.69    7.10
  -6   4   2   82.69    4.50
  -6   4   2   78.79    5.70
  -6   4   2   73.29    6.10
  -6   4   2   80.49    4.40
   5  -4  -2   13.20    2.50
   5  -4  -2   11.30    3.80
   5  -4  -2    9.90    4.80
   5  -4  -2    8.70    3.30
  -5   4   2    8.70    1.90
  -5   4   2    9.10    1.90
  -5   4   2    7.50    2.20
  -5   4   2    8.60    2.30
   4  -4  -2   97.49    9.60
   4  -4  -2  101.29    5.10
   4  -4  -2   89.39    6.90
   4  -4  -2   90.69    6.70
   4  -4  -2  100.99    5.60
   4  -4  -2   99.29    5.70
   4  -4  -2   96.79    6.40
  -4   4   2  101.99    4.90
  -4   4   2  108.39    4.40
  -4   4   2  101.59    4.40
   3  -4  -2  215.28    8.10
   3  -4  -2  194.98    7.10
   3  -4  -2  199.58    7.30
  -3   4   2  180.68    6.90
  -3   4   2  190.78    6.90
  -3   4   2  200.68    7.20
  -3   4   2  199.28    7.30
  -3   4   2  189.18    7.10
  -3   4   2  198.58    7.40
   2  -4  -2 1000.60   33.10
   2  -4  -2 1048.70   33.10
   2  -4  -2 1100.69   33.20
   2  -4  -2 1058.89   33.60
  -2   4   2 1053.39   33.30
  -2   4   2 1037.40   33.30
  -2   4   2 1055.99   33.20
   1  -4  -2  501.55   16.10
   1  -4  -2  509.85   15.90
   1  -4  -2  494.65   15.70
   1  -4  -2  473.15   16.30
   1  -4  -2  502.55   15.80
   1  -4  -2  504.65   16.20
  -1   4   2  501.75   15.80
  -1   4   2  460.05   15.70
  -1   4   2  490.75   15.80
  -1   4   2  488.35   15.60
  -1   4   2  493.95   15.80
  -1   4   2  485.65   15.80
  -1   4   2  472.35   15.70
   0  -4  -2  361.76   12.10
   0  -4  -2  371.96   12.40
   0  -4  -2  382.16   12.40
   0  -4  -2  371.46   11.80
   0  -4  -2  376.26   12.10
   0   4   2  382.46   12.10
   0   4   2  372.16   12.20
   0   4   2  384.96   12.00
   0   4   2  359.16   12.10
   0   4   2  365.96   11.70
   0   4   2  388.96   12.10
   0   4   2  351.96   12.10
  -1  -4  -2  392.66   13.80
  -1  -4  -2  417.86   14.00
  -1  -4  -2  414.76   13.70
  -1  -4  -2  432.26   13.80
  -1  -4  -2  439.46   14.00
   1   4   2  442.06   13.90
   1   4   2  435.96   13.70
   1   4   2  433.86   13.90
  -2  -4  -2  170.78    6.40
  -2  -4  -2  171.78    6.10
  -2  -4  -2  164.08    6.20
  -2  -4  -2  175.88    6.30
  -2  -4  -2  183.68    6.60
   2   4   2  175.48    6.20
   2   4   2  180.38    6.30
   2   4   2  175.98    6.10
  -3  -4  -2  166.28    6.40
  -3  -4  -2  171.58    6.10
  -3  -4  -2  177.28    7.20
  -3  -4  -2  164.68    6.00
   3   4   2  161.08    7.80
   3   4   2  158.38    6.60
   3   4   2  168.98    7.70
   3   4   2  169.78    7.00
   3   4   2  160.58    6.40
   3   4   2  160.28    6.90
  -4  -4  -2   53.09    3.00
  -4  -4  -2   48.00    4.60
  -4  -4  -2   49.60    3.00
   4   4   2   48.30    3.30
   4   4   2   49.30    5.80
  -5  -4  -2  114.49    4.80
  -5  -4  -2  114.09    5.00
   5   4   2  114.19    6.70
   5   4   2  105.89    5.80
   5   4   2  111.99    6.00
   5   4   2  115.49    5.70
   5   4   2  102.79    7.10
  -6  -4  -2    6.70    2.00
  -6  -4  -2    5.60    1.60
   6   4   2    7.20    2.10
   6   4   2    6.50    2.40
   6   4   2    5.00    3.10
  -7  -4  -2   27.40    3.70
  -7  -4  -2   27.00    3.40
   7   4   2   26.00    2.30
   7   4   2   25.90    2.30
   7   4   2   19.40    3.20
   8  -5  -2    7.50    2.40
   8  -5  -2    6.80    3.20
  -8   5   2    9.70    2.70
  -8   5   2    0.60    2.80
   7  -5  -2   48.70    5.40
   7  -5  -2   56.69    5.10
   7  -5  -2   60.19    4.80
   7  -5  -2   56.79    3.90
  -7   5   2   62.59    4.50
  -7   5   2   58.79    3.90
  -7   5   2   52.19    4.60
  -7   5   2   59.09    4.60
   6  -5  -2   25.20    4.40
   6  -5  -2   22.80    5.00
   6  -5  -2   23.60    3.90
   6  -5  -2   22.50    3.70
   6  -5  -2   18.90    3.80
  -6   5   2   30.60    5.20
  -6   5   2   26.20    3.40
  -6   5   2   22.00    3.30
   5  -5  -2  130.19    8.70
   5  -5  -2  135.49    6.90
   5  -5  -2  124.69    7.40
   5  -5  -2  135.89    8.60
   5  -5  -2  134.09    7.90
  -5   5   2  137.39    5.80
  -5   5   2  129.79    7.10
  -5   5   2  131.29    5.60
  -5   5   2  132.29    6.40
   4  -5  -2    8.10    3.40
   4  -5  -2    7.00    2.70
   4  -5  -2    7.50    3.00
   4  -5  -2    4.40    3.80
   4  -5  -2    9.70    2.70
   4  -5  -2    4.10    5.40
   4  -5  -2   11.80    3.00
  -4   5   2    8.10    1.90
  -4   5   2    9.50    1.80
  -4   5   2    6.60    1.60
  -4   5   2    5.50    1.70
  -4   5   2    8.00    2.60
   3  -5  -2  505.95   17.10
   3  -5  -2  480.65   16.80
   3  -5  -2  476.65   17.90
   3  -5  -2  476.65   17.40
   3  -5  -2  510.25   18.40
   3  -5  -2  495.45   16.50
   3  -5  -2  478.45   17.30
  -3   5   2  487.65   16.80
  -3   5   2  525.45   16.70
  -3   5   2  518.75   16.30
  -3   5   2  515.65   16.70
  -3   5   2  520.15   16.40
  -3   5   2  483.05   16.90
   2  -5  -2  128.69    5.60
   2  -5  -2  133.29    5.20
   2  -5  -2  143.29    5.80
  -2   5   2  135.69    5.20
  -2   5   2  138.49    5.10
  -2   5   2  135.79    5.30
  -2   5   2  136.49    5.70
  -2   5   2  134.19    5.40
  -2   5   2  136.79    5.10
   1  -5  -2  231.08    7.80
   1  -5  -2  229.28    8.50
   1  -5  -2  221.98    8.50
  -1   5   2  229.98    8.10
  -1   5   2  228.38    8.00
  -1   5   2  225.68    7.70
  -1   5   2  233.38    7.90
  -1   5   2  239.08    7.90
   0  -5  -2    7.50    1.00
   0  -5  -2    6.00    1.40
   0  -5  -2    7.20    0.90
   0  -5  -2   10.00    2.00
   0  -5  -2    5.90    1.20
   0   5   2    6.50    1.00
   0   5   2    7.70    1.10
   0   5   2    7.70    1.10
   0   5   2    6.60    0.80
  -1  -5  -2  668.63   21.70
  -1  -5  -2  686.83   21.70
  -1  -5  -2  678.73   21.60
  -1  -5  -2  666.43   22.00
  -1  -5  -2  685.63   22.10
   1   5   2  644.84   21.70
   1   5   2  680.33   21.70
   1   5   2  661.33   21.60
   1   5   2  709.83   21.80
  -2  -5  -2   90.79    5.10
  -2  -5  -2   88.29    3.90
  -2  -5  -2   94.29    4.50
  -2  -5  -2   95.19    3.90
  -2  -5  -2   92.59    4.00
   2   5   2   92.99    4.70
   2   5   2   86.99    4.90
   2   5   2   90.29    4.80
   2   5   2   97.39    4.10
   2   5   2   90.59    4.80
   2   5   2   93.99    4.10
  -3  -5  -2  809.32   26.60
  -3  -5  -2  735.63   25.50
  -3  -5  -2  760.92   25.10
  -3  -5  -2  825.52   25.20
   3   5   2  791.82   25.30
   3   5   2  794.72   26.10
   3   5   2  778.02   25.60
   3   5   2  782.72   26.30
   3   5   2  780.12   25.90
   3   5   2  798.92   25.90
  -4  -5  -2   75.49    3.90
  -4  -5  -2   82.89    6.00
  -4  -5  -2   74.79    4.10
   4   5   2   85.29    5.90
   4   5   2   77.89    4.70
   4   5   2   85.89    4.50
   4   5   2   59.79    5.90
   4   5   2   77.39    4.80
   4   5   2   77.89    4.30
  -5  -5  -2  286.87   10.30
  -5  -5  -2  289.57   10.20
  -5  -5  -2  279.57   12.50
   5   5   2  294.27   10.90
   5   5   2  298.87   11.20
   5   5   2  292.17   11.80
   5   5   2  273.57   11.10
   5   5   2  292.07   10.80
  -6  -5  -2   11.20    2.30
  -6  -5  -2   16.60    2.60
   6   5   2   11.20    4.10
  -7  -5  -2    1.90    2.20
  -7  -5  -2    5.30    3.00
   7   5   2    5.70    1.20
   7   5   2    3.30    1.10
   7   5   2    6.30    1.70
  -8   6   2    9.50    1.70
   7  -6  -2   46.30    4.20
   7  -6  -2   40.90    4.20
   7  -6  -2   42.00    3.50
  -7   6   2   48.10    4.40
  -7   6   2   46.90    5.90
  -7   6   2   41.20    3.10
  -7   6   2   40.70    3.90
   6  -6  -2   38.00    5.40
   6  -6  -2   42.10    4.20
   6  -6  -2   34.00    5.80
   6  -6  -2   37.50    7.70
  -6   6   2   44.60    3.70
  -6   6   2   40.30    5.90
  -6   6   2   42.30    3.70
   5  -6  -2   12.10    2.90
   5  -6  -2   10.20    3.60
   5  -6  -2    4.40    3.70
   5  -6  -2   16.10    4.20
   5  -6  -2   11.70    4.70
  -5   6   2    8.30    2.30
  -5   6   2   12.00    2.90
  -5   6   2   11.90    1.90
  -5   6   2   14.20    2.70
   4  -6  -2  248.58   12.70
   4  -6  -2  245.58   10.10
   4  -6  -2  241.58   11.90
   4  -6  -2  228.08   11.40
   4  -6  -2  251.77   10.90
   4  -6  -2  220.38   10.50
  -4   6   2  248.38    8.80
  -4   6   2  233.48    9.40
  -4   6   2  237.78    9.20
  -4   6   2  250.07    8.90
  -4   6   2  242.88    9.20
   3  -6  -2    1.50    2.00
   3  -6  -2    0.20    2.40
   3  -6  -2   -3.10    2.50
   3  -6  -2    1.50    2.90
   3  -6  -2    1.30    4.20
   3  -6  -2    1.90    2.40
   3  -6  -2    8.70    4.00
  -3   6   2   -0.50    2.00
  -3   6   2    0.20    3.30
  -3   6   2    0.10    1.20
  -3   6   2   -0.20    1.10
  -3   6   2    1.10    1.30
  -3   6   2    2.70    1.40
   2  -6  -2   73.99    6.10
   2  -6  -2   73.59    4.90
   2  -6  -2   84.59    6.80
   2  -6  -2   83.19    6.20
   2  -6  -2   82.39    4.10
   2  -6  -2   84.49    4.50
   2  -6  -2   80.59    4.00
   2  -6  -2   69.29    8.00
  -2   6   2   78.19    4.30
  -2   6   2   80.29    3.70
  -2   6   2   76.69    4.00
  -2   6   2   85.39    3.70
  -2   6   2   76.79    5.00
  -2   6   2   84.69    3.80
  -2   6   2   82.79    3.60
   1  -6  -2  240.58    8.80
   1  -6  -2  230.28    7.90
   1  -6  -2  225.28    8.90
   1  -6  -2  231.98    8.40
   1  -6  -2  228.88    8.20
   1  -6  -2  228.88    9.70
  -1   6   2  237.48    8.00
  -1   6   2  229.48    8.60
  -1   6   2  228.68    8.30
  -1   6   2  230.08    8.00
  -1   6   2  230.58    8.10
  -1   6   2  213.88    8.60
  -1   6   2  232.88    8.20
   0  -6  -2  126.19    4.40
   0  -6  -2  125.29    6.30
   0  -6  -2  127.29    5.10
   0  -6  -2  127.99    5.10
   0  -6  -2  130.99    5.60
   0  -6  -2  134.09    5.60
   0   6   2  122.49    5.80
   0   6   2  127.19    5.40
   0   6   2  128.69    4.80
   0   6   2  129.49    5.00
   0   6   2  130.29    4.90
   0   6   2  118.49    5.60
  -1  -6  -2  999.60   30.50
  -1  -6  -2  961.60   30.70
  -1  -6  -2  979.20   31.50
  -1  -6  -2  961.90   31.10
   1   6   2  956.40   30.80
   1   6   2  976.70   30.70
   1   6   2  979.40   31.10
   1   6   2  850.21   30.90
   1   6   2  939.21   30.80
   1   6   2  972.50   30.60
   1   6   2  956.90   31.20
   1   6   2  970.80   31.00
  -2  -6  -2  163.08    6.10
  -2  -6  -2  150.08    6.90
  -2  -6  -2  156.48    6.70
  -2  -6  -2  163.98    6.20
   2   6   2  158.88    6.20
   2   6   2  157.58    7.50
   2   6   2  152.78    6.10
   2   6   2  157.58    6.90
   2   6   2  158.58    8.10
   2   6   2  157.78    6.60
   2   6   2  151.88    6.40
   2   6   2  152.68    7.00
  -3  -6  -2   50.29    3.10
  -3  -6  -2   46.00    3.30
  -3  -6  -2   43.60    4.60
   3   6   2   35.30    5.30
   3   6   2   35.40    3.30
   3   6   2   52.59    4.20
   3   6   2   47.50    3.70
  -4  -6  -2   29.40    3.20
  -4  -6  -2   15.70    6.80
  -4  -6  -2   27.00    2.70
   4   6   2   31.20    3.70
   4   6   2   25.30    3.80
   4   6   2   28.70    4.80
   4   6   2   24.10    3.60
   4   6   2   29.20    3.10
   4   6   2   27.60    3.40
   4   6   2   26.20    4.50
  -5  -6  -2   19.30    3.10
  -5  -6  -2   21.10    6.40
  -5  -6  -2   16.00    2.90
   5   6   2    9.10    3.90
   5   6   2   27.90    5.00
   5   6   2   13.40    2.70
   5   6   2   20.70    3.40
   5   6   2   19.80    2.90
  -6  -6  -2   99.49    5.10
   6   6   2  106.99    4.90
   6   6   2   89.29    4.90
   6   6   2  102.89    6.50
   6   6   2  108.79    5.10
  -7  -6  -2   10.00    2.70
   7   6   2   11.60    2.00
   7   6   2   12.40    1.90
   7  -7  -2   11.20    2.40
   7  -7  -2    6.00    2.50
   7  -7  -2   10.70    2.20
  -7   7   2   10.80    2.80
  -7   7   2   14.40    2.40
  -7   7   2    9.70    2.20
   6  -7  -2   54.59    5.90
   6  -7  -2   49.90    4.40
  -6   7   2   48.20    3.10
  -6   7   2   49.80    3.90
  -6   7   2   48.00    4.80
  -6   7   2   52.29    4.60
   5  -7  -2  133.89    8.20
   5  -7  -2  129.29    8.80
   5  -7  -2  138.79    7.80
  -5   7   2  131.79    7.20
  -5   7   2  134.09    6.20
  -5   7   2  148.19    6.20
  -5   7   2  140.69    6.10
   4  -7  -2  149.49    8.80
   4  -7  -2  155.98   10.50
   4  -7  -2  150.48    8.70
   4  -7  -2  158.48    7.90
  -4   7   2  169.18    7.20
  -4   7   2  151.58    6.40
  -4   7   2  165.48    6.80
  -4   7   2  166.08    6.20
  -4   7   2  154.78    6.50
  -4   7   2  125.59    8.60
   3  -7  -2  209.18   12.30
   3  -7  -2  232.38    9.80
   3  -7  -2  227.48    9.80
  -3   7   2  240.18    8.60
  -3   7   2  247.28    8.80
  -3   7   2  241.38    8.40
  -3   7   2  251.77    9.00
  -3   7   2  217.98    9.30
  -3   7   2  212.98    8.50
  -3   7   2  231.08    9.50
   2  -7  -2    5.60    3.20
   2  -7  -2    4.70    2.50
   2  -7  -2    3.30    4.10
   2  -7  -2    8.70    3.20
   2  -7  -2    4.80    2.20
   2  -7  -2    4.20    3.30
   2  -7  -2    3.50    2.70
   2  -7  -2    3.10    2.70
  -2   7   2    5.50    2.10
  -2   7   2   11.00    3.90
  -2   7   2    4.70    1.80
  -2   7   2    8.60    1.60
  -2   7   2    6.50    2.80
  -2   7   2    8.50    1.40
   1  -7  -2   62.69    5.20
   1  -7  -2   68.59    3.80
   1  -7  -2   62.69    4.20
   1  -7  -2   66.69    4.80
   1  -7  -2   70.79    6.70
   1  -7  -2   64.29    3.40
   1  -7  -2   68.39    4.40
  -1   7   2   70.79    4.00
  -1   7   2   63.89    4.70
  -1   7   2   69.89    3.40
  -1   7   2   63.69    4.50
  -1   7   2   57.39    4.20
  -1   7   2   68.59    4.60
  -1   7   2   67.79    3.60
  -1   7   2   72.39    4.00
   0  -7  -2  390.66   14.50
   0  -7  -2  429.16   15.10
   0  -7  -2  425.46   14.80
   0  -7  -2  441.66   14.40
   0   7   2  420.96   15.00
   0   7   2  443.46   14.30
   0   7   2  407.96   14.60
   0   7   2  446.56   14.50
   0   7   2  423.26   14.50
   0   7   2  415.96   14.80
   0   7   2  429.16   14.70
  -1  -7  -2   23.70    2.70
  -1  -7  -2   23.30    3.30
  -1  -7  -2   16.60    3.40
   1   7   2   20.30    3.10
   1   7   2   22.10    2.40
   1   7   2   22.70    2.60
   1   7   2   23.90    3.00
   1   7   2   21.70    2.30
   1   7   2   21.10    2.70
   1   7   2   19.80    2.50
  -2  -7  -2   93.39    5.60
  -2  -7  -2   95.99    4.60
  -2  -7  -2   97.69    5.00
   2   7   2   98.99    5.70
   2   7   2   88.19    4.90
   2   7   2   96.39    5.00
  -3  -7  -2  384.26   13.20
  -3  -7  -2  391.36   13.10
  -3  -7  -2  368.36   14.90
   3   7   2  381.16   13.30
   3   7   2  375.06   14.00
   3   7   2  377.26   13.50
   3   7   2  365.46   12.90
  -4  -7  -2   71.29    6.00
  -4  -7  -2   74.49    4.40
   4   7   2   71.69    5.70
   4   7   2   73.49    5.40
   4   7   2   69.39    3.90
   4   7   2   84.39    4.70
   4   7   2   77.99    5.00
  -5  -7  -2   15.10    2.70
  -5  -7  -2   12.20    2.40
   5   7   2   10.20    2.50
   5   7   2   10.80    3.70
   5   7   2   19.80    3.60
  -6  -7  -2    7.20    2.10
  -6  -7  -2    7.40    2.80
   6   7   2   10.70    3.20
   6   7   2    6.70    1.50
   6   7   2    5.10    1.50
   7  -8  -2   11.60    4.50
   7  -8  -2   13.30    2.20
   7  -8  -2   10.80    1.90
  -7   8   2    7.40    1.80
  -7   8   2    6.40    2.10
   6  -8  -2   57.79    4.50
   6  -8  -2   56.99    6.50
   6  -8  -2   64.39    4.20
  -6   8   2   64.19    3.40
  -6   8   2   54.19    5.40
   5  -8  -2   51.69    5.20
   5  -8  -2   49.30    6.90
   5  -8  -2   47.30    6.10
  -5   8   2   50.49    3.10
  -5   8   2   57.09    4.80
  -5   8   2   42.70    4.20
  -5   8   2   45.50    5.80
   4  -8  -2   77.09    6.60
   4  -8  -2   55.89    8.70
   4  -8  -2   82.19    6.30
   4  -8  -2   66.39    8.60
  -4   8   2   75.89    4.30
  -4   8   2   77.69    4.70
  -4   8   2   79.69    5.10
  -4   8   2   78.79    4.80
  -4   8   2   79.99    5.20
  -4   8   2   68.39    5.90
   3  -8  -2    4.50    3.30
   3  -8  -2    7.40    3.50
   3  -8  -2   -0.90    3.30
   3  -8  -2    5.60    4.20
   3  -8  -2   -3.20    2.90
  -3   8   2    3.70    2.10
  -3   8   2    0.20    3.00
  -3   8   2    3.10    1.90
  -3   8   2    1.20    2.60
  -3   8   2    5.50    1.70
  -3   8   2    3.20    1.90
   2  -8  -2    7.70    3.30
   2  -8  -2   11.40    3.90
   2  -8  -2    4.60    3.10
   2  -8  -2    5.40    3.50
   2  -8  -2    3.60    2.70
  -2   8   2    7.40    1.60
  -2   8   2    8.00    1.70
  -2   8   2    9.80    2.10
  -2   8   2    7.60    2.90
  -2   8   2    4.60    2.40
  -2   8   2    8.10    2.10
  -2   8   2    4.20    2.50
   1  -8  -2   22.20    4.10
   1  -8  -2   31.20    4.60
   1  -8  -2   25.80    3.40
   1  -8  -2   25.50    4.70
  -1   8   2   23.80    2.40
  -1   8   2   22.50    3.60
  -1   8   2   23.20    2.90
  -1   8   2   21.30    3.80
  -1   8   2   26.60    2.70
   0  -8  -2    8.80    2.00
   0  -8  -2   10.80    2.90
   0  -8  -2   11.20    3.00
   0   8   2    8.00    1.80
   0   8   2    9.00    1.60
   0   8   2    8.30    2.10
   0   8   2    8.70    2.10
  -1  -8  -2  280.17   10.60
  -1  -8  -2  257.77   11.00
  -1  -8  -2  281.97    9.90
   1   8   2  252.87   10.00
   1   8   2  270.57   10.00
   1   8   2  272.97   10.30
   1   8   2  274.87   10.20
   1   8   2  256.27    9.80
   1   8   2  264.37    9.80
   1   8   2  266.47    9.80
  -2  -8  -2   45.40    3.70
  -2  -8  -2   47.20    4.60
  -2  -8  -2   41.30    5.70
  -2  -8  -2   44.40    5.40
   2   8   2   35.70    3.90
   2   8   2   47.30    4.00
   2   8   2   43.40    3.20
   2   8   2   43.90    3.80
   2   8   2   50.89    4.60
   2   8   2   48.10    4.40
  -3  -8  -2  321.37   11.60
  -3  -8  -2  324.67   13.80
  -3  -8  -2  331.47   11.70
   3   8   2  324.87   11.70
   3   8   2  315.07   12.10
   3   8   2  313.47   11.30
   3   8   2  316.77   11.90
   3   8   2  325.17   12.40
  -4  -8  -2   70.29    7.30
  -4  -8  -2   80.39    4.70
  -4  -8  -2   77.99    4.50
   4   8   2   84.79    4.70
   4   8   2   79.89    5.40
   4   8   2   86.69    5.00
   4   8   2   83.19    5.80
  -5  -8  -2  209.58    9.60
  -5  -8  -2  188.98    8.10
   5   8   2  190.48    7.90
   5   8   2  203.88    7.90
   5   8   2  191.68    7.50
  -6  -8  -2   17.10    2.70
   6   8   2   18.20    3.70
   6   8   2   17.80    2.40
   6   8   2   23.10    2.60
   7  -9  -2   11.60    1.70
   7  -9  -2   14.40    2.90
  -7   9   2   12.70    1.90
   6  -9  -2  139.79    6.80
   6  -9  -2  152.18    6.30
  -6   9   2  145.99    6.00
  -6   9   2  154.28    6.20
   5  -9  -2   35.20    5.50
   5  -9  -2   32.30    5.40
  -5   9   2   29.70    3.50
  -5   9   2   21.30    3.70
  -5   9   2   28.70    4.50
   4  -9  -2   63.59    6.00
   4  -9  -2   62.09   10.90
   4  -9  -2   79.29    6.70
   4  -9  -2   61.89    8.80
  -4   9   2   61.39    5.50
  -4   9   2   73.59    4.70
  -4   9   2   64.79    4.00
  -4   9   2   53.89    6.50
  -4   9   2   65.89    4.40
  -4   9   2   64.69    4.90
  -4   9   2   63.79    5.90
   3  -9  -2   15.10    3.90
   3  -9  -2    7.60    5.10
   3  -9  -2   18.50    4.10
   3  -9  -2   11.70    4.40
  -3   9   2   12.60    2.60
  -3   9   2    9.90    3.20
  -3   9   2   16.10    3.00
  -3   9   2   14.40    3.10
  -3   9   2    7.60    2.60
  -3   9   2   15.10    2.20
   2  -9  -2   40.00    6.70
   2  -9  -2   50.99    6.50
   2  -9  -2   49.10    5.80
  -2   9   2   49.70    3.40
  -2   9   2   47.80    3.60
  -2   9   2   47.70    4.70
  -2   9   2   50.19    4.60
  -2   9   2   57.09    4.40
   1  -9  -2   49.40    5.30
   1  -9  -2   45.70    5.60
   1  -9  -2   42.80    5.60
   1  -9  -2   54.89    7.40
  -1   9   2   43.40    5.10
  -1   9   2   46.80    4.60
  -1   9   2   44.60    3.40
  -1   9   2   53.49    5.50
  -1   9   2   37.60    3.70
  -1   9   2   46.80    4.00
  -1   9   2   50.49    3.80
   0  -9  -2   15.00    2.30
   0  -9  -2   13.80    4.00
   0  -9  -2   14.30    3.60
   0  -9  -2   14.00    2.90
   0   9   2   17.90    2.40
   0   9   2   11.40    2.40
   0   9   2   14.50    2.30
   0   9   2   20.40    3.10
   0   9   2   12.60    2.20
   0   9   2   19.90    4.00
   0   9   2   14.20    2.90
  -1  -9  -2  597.44   19.70
  -1  -9  -2  594.64   20.40
   1   9   2  574.34   19.70
   1   9   2  590.94   20.00
   1   9   2  584.04   19.90
   1   9   2  591.14   19.70
   1   9   2  578.84   20.40
   1   9   2  584.44   19.90
  -2  -9  -2   49.50    8.30
  -2  -9  -2   46.90    5.30
  -2  -9  -2   53.19    3.70
  -2  -9  -2   51.89    4.70
   2   9   2   50.49    3.80
   2   9   2   51.79    4.70
   2   9   2   51.59    5.60
   2   9   2   51.29    4.80
   2   9   2   53.09    4.20
   2   9   2   54.79    4.20
  -3  -9  -2   74.89    4.60
  -3  -9  -2   63.59    8.70
  -3  -9  -2   76.19    4.80
   3   9   2   74.59    4.70
   3   9   2   78.39    3.80
   3   9   2   76.79    4.80
   3   9   2   75.59    5.10
   3   9   2   77.39    5.80
  -4  -9  -2    2.20    2.00
  -4  -9  -2    0.50    2.50
   4   9   2    3.70    1.20
   4   9   2    3.30    1.30
   4   9   2    1.80    1.80
   4   9   2    6.40    2.60
  -5  -9  -2   17.30    3.10
  -5  -9  -2   14.00    2.70
   5   9   2   17.10    2.70
   5   9   2   18.80    2.40
   5   9   2   19.20    3.40
   6 -10  -2   24.10    2.90
   6 -10  -2   17.70    2.50
  -6  10   2   15.90    2.30
   5 -10  -2   21.80    4.00
   5 -10  -2   23.10    4.60
   5 -10  -2   16.10    3.00
  -5  10   2   27.90    2.50
  -5  10   2   24.60    2.50
   4 -10  -2    2.30    3.20
  -4  10   2   -1.50    2.70
  -4  10   2   -1.20    3.40
   3 -10  -2    2.90    3.60
   3 -10  -2    6.50    4.10
   3 -10  -2    5.50    3.90
   3 -10  -2    7.10    7.00
  -3  10   2    6.70    2.70
  -3  10   2    4.10    2.70
  -3  10   2    1.70    2.10
  -3  10   2    1.80    2.30
   2 -10  -2   27.50    6.00
   2 -10  -2   45.40    6.90
   2 -10  -2   38.50    5.90
  -2  10   2   39.90    4.10
  -2  10   2   37.30    3.20
  -2  10   2   41.10    3.80
  -2  10   2   30.20    4.40
  -2  10   2   41.50    4.80
  -2  10   2   29.70    4.90
   1 -10  -2    0.60    5.20
   1 -10  -2    7.20    3.50
   1 -10  -2   -1.50    3.70
   1 -10  -2    1.70    3.30
   1 -10  -2   -0.60    4.80
  -1  10   2    1.50    2.90
  -1  10   2   -2.60    2.10
  -1  10   2   -0.20    2.10
  -1  10   2    3.30    2.10
  -1  10   2    5.10    2.80
   0 -10  -2   -2.70    5.40
   0 -10  -2    6.10    3.70
   0 -10  -2    1.60    2.50
   0  10   2    3.80    3.20
   0  10   2    3.70    2.30
   0  10   2    6.00    2.10
   0  10   2    4.60    1.70
   0  10   2    5.10    2.40
   0  10   2    4.40    2.60
  -1 -10  -2   80.09    6.10
  -1 -10  -2   85.79    4.80
  -1 -10  -2   69.09    8.50
  -1 -10  -2   86.79    7.10
  -1 -10  -2   78.19    9.40
   1  10   2   80.69    5.10
   1  10   2   77.49    5.30
   1  10   2   76.49    5.80
   1  10   2   79.59    5.00
   1  10   2   76.59    4.40
  -2 -10  -2   84.29    5.10
  -2 -10  -2   84.69    6.60
  -2 -10  -2   85.79    6.20
   2  10   2   79.09    5.10
   2  10   2   82.89    5.30
   2  10   2   82.79    5.40
   2  10   2   83.49    5.10
   2  10   2   80.89    4.10
   2  10   2   88.49    5.90
  -3 -10  -2   68.59    5.00
  -3 -10  -2   66.49    4.40
   3  10   2   58.79    4.00
   3  10   2   66.29    5.20
   3  10   2   73.59    4.30
   3  10   2   62.49    4.40
   3  10   2   60.29    3.50
  -4 -10  -2   70.99    5.20
  -4 -10  -2   65.29    4.70
   4  10   2   60.49    3.40
   4  10   2   63.19    3.30
   4  10   2   67.99    4.50
   4  10   2   64.89    3.60
  -5 -10  -2   38.50    5.10
  -5 -10  -2   45.50    4.60
   5  10   2   43.40    3.60
   5  10   2   39.00    2.50
   5 -11  -2    6.70    1.80
   5 -11  -2    8.20    2.30
  -5  11   2    8.10    3.00
  -5  11   2    5.80    1.50
  -5  11   2    6.80    2.40
   4 -11  -2   65.59    5.00
   4 -11  -2   55.89    6.20
   4 -11  -2   58.79    4.10
  -4  11   2   59.99    3.40
  -4  11   2   59.69    3.80
  -4  11   2   59.69    4.70
   3 -11  -2   83.49    6.10
   3 -11  -2   88.89    7.20
   3 -11  -2   66.19    5.70
  -3  11   2   85.09    4.50
  -3  11   2   83.19    4.90
  -3  11   2   76.69    4.60
  -3  11   2   72.49    5.10
   2 -11  -2  143.79    8.10
   2 -11  -2  122.19    9.00
  -2  11   2  138.49    6.40
  -2  11   2  137.69    6.40
  -2  11   2  130.89    6.70
   1 -11  -2    5.90    5.70
   1 -11  -2    3.50    3.90
   1 -11  -2    5.70    3.30
  -1  11   2    5.00    2.20
  -1  11   2    1.00    2.90
  -1  11   2    0.80    2.80
  -1  11   2    4.90    2.20
   0 -11  -2  237.48    9.60
   0 -11  -2  232.18    9.70
   0 -11  -2  241.08   10.80
   0  11   2  238.28    9.50
   0  11   2  245.58    9.00
   0  11   2  216.48    9.60
   0  11   2  226.88    8.90
   0  11   2  193.98   13.30
  -1 -11  -2   22.00    3.40
  -1 -11  -2   16.40    2.80
   1  11   2   16.40    2.90
  -2 -11  -2  327.17   12.50
  -2 -11  -2  343.87   13.00
   2  11   2  308.37   11.90
   2  11   2  324.27   11.90
   2  11   2  331.87   11.70
   2  11   2  347.87   12.20
   2  11   2  345.07   11.50
   2  11   2  332.37   12.30
  -3 -11  -2    1.40    2.80
  -3 -11  -2    4.20    2.50
  -3 -11  -2    9.70    3.30
   3  11   2    1.40    2.00
   3  11   2    6.10    2.50
   3  11   2    5.40    1.40
   3  11   2    2.80    1.60
  -4 -11  -2   46.00    4.50
  -4 -11  -2   45.10    6.10
   4  11   2   45.30    4.40
   4  11   2   46.50    3.10
   4  11   2   34.50    4.30
   4 -12  -2   11.50    4.30
   4 -12  -2    7.90    1.90
   4 -12  -2    7.90    2.00
  -4  12   2    5.30    2.00
  -4  12   2    7.80    2.00
  -4  12   2    8.30    2.00
   3 -12  -2   12.90    3.50
   3 -12  -2    4.60    3.30
   3 -12  -2   10.00    2.70
  -3  12   2    8.50    1.60
  -3  12   2    8.40    2.00
  -3  12   2   10.00    2.50
   2 -12  -2   24.10    3.30
   2 -12  -2   30.00    4.60
   2 -12  -2   32.50    4.00
  -2  12   2   28.50    3.10
  -2  12   2   23.00    2.30
   1 -12  -2   23.20    4.50
   1 -12  -2   27.80    6.90
  -1  12   2   29.90    2.80
  -1  12   2   25.50    3.10
   0 -12  -2    3.70    2.80
   0 -12  -2    5.40    4.80
   0 -12  -2    7.80    3.70
   0  12   2    4.30    1.80
   0  12   2    1.30    2.20
   0  12   2    2.80    1.60
  -1 -12  -2   22.00    4.20
  -1 -12  -2   16.00    3.40
  -1 -12  -2   26.00    4.30
   1  12   2   19.60    2.80
   1  12   2   20.00    3.10
   1  12   2   19.90    2.60
   1  12   2   22.30    2.10
  -2 -12  -2   49.10    4.60
  -2 -12  -2   41.60    4.70
  -2 -12  -2   61.39    5.00
   2  12   2   52.29    2.80
   2  12   2   47.40    3.90
  -3 -12  -2    4.60    3.10
  -3 -12  -2    5.30    2.70
   3  12   2    1.80    1.40
   3 -13  -2    4.10    3.20
   3 -13  -2    4.80    3.00
   3 -13  -2    9.60    2.50
  -3  13   2    2.90    1.10
  -3  13   2    2.90    1.40
   2 -13  -2    4.10    2.60
   2 -13  -2   -0.90    2.90
   2 -13  -2   13.20    4.90
  -2  13   2    4.70    1.30
  -2  13   2    5.10    1.70
   1 -13  -2   47.20    5.00
   1 -13  -2   49.80    4.70
  -1  13   2   46.50    3.00
  -1  13   2   43.10    2.70
   0 -13  -2    3.90    2.90
   0  13   2    1.70    1.70
   0  13   2   -1.00    1.30
  -1 -13  -2   76.69    6.70
  -1 -13  -2  106.59    7.00
   1  13   2   87.89    4.80
   1  13   2   79.89    4.30
   1  13   2   88.69    3.60
   2  14  -3   52.69    3.80
  -2 -14   3   56.59    5.00
   1  14  -3   36.60    2.40
  -1 -14   3   33.80    3.80
  -1 -14   3   47.60    6.60
   0  14  -3    8.40    1.80
   0  14  -3    9.80    1.80
   0 -14   3   12.00    2.70
   0 -14   3    2.60    4.00
  -1  14  -3   63.59    3.30
  -1  14  -3   67.29    3.80
   1 -14   3   54.99    7.40
   1 -14   3   69.79    5.60
  -2  14  -3   26.80    2.20
  -2  14  -3   26.50    4.00
  -2  14  -3   27.30    2.60
   2 -14   3   26.50    3.30
  -3  14  -3    6.50    1.30
  -3  14  -3    5.50    1.90
   3 -14   3    5.80    2.50
   3 -14   3   12.40    2.90
   3  13  -3   37.30    3.60
   3  13  -3   34.10    3.10
   3  13  -3   36.40    2.50
  -3 -13   3   40.60    4.90
   2  13  -3   -0.20    1.50
   2  13  -3   -3.60    1.80
   2  13  -3   -1.90    2.40
   2  13  -3    1.00    1.50
  -2 -13   3    1.90    2.60
  -2 -13   3   -2.50    2.40
   1  13  -3   13.90    2.00
   1  13  -3    8.00    2.80
   1  13  -3   15.40    2.40
   1  13  -3   14.70    2.60
  -1 -13   3   13.00    2.90
  -1 -13   3    9.50    3.10
   0  13  -3   13.10    2.00
   0  13  -3   16.30    2.60
   0 -13   3   14.20    3.20
  -1  13  -3   83.79    5.60
  -1  13  -3   96.79    4.40
  -1  13  -3   91.09    4.90
   1 -13   3   83.59    8.20
   1 -13   3   92.59    5.80
   1 -13   3  101.29    7.30
  -2  13  -3  420.66   14.50
  -2  13  -3  457.05   14.60
  -2  13  -3  394.16   14.40
   2 -13   3  430.26   16.00
  -3  13  -3   36.30    2.50
  -3  13  -3   37.70    2.70
  -3  13  -3   38.20    3.30
   3 -13   3   39.70    4.50
   3 -13   3   42.30    5.30
  -4  13  -3   33.10    3.00
  -4  13  -3   27.40    2.60
   4 -13   3   27.20    4.10
   4 -13   3   26.90    3.90
   4  12  -3   16.00    2.60
   4  12  -3   15.80    2.50
   4  12  -3   19.60    2.60
  -4 -12   3   12.20    2.60
  -4 -12   3   11.50    3.20
   3  12  -3   39.40    3.20
   3  12  -3   36.70    3.40
   3  12  -3   33.70    4.10
   3  12  -3   41.80    3.30
  -3 -12   3   43.10    4.60
   2  12  -3    2.20    2.40
   2  12  -3   -1.20    2.00
   2  12  -3    2.00    1.90
   2  12  -3    1.60    1.90
  -2 -12   3    4.00    2.10
  -2 -12   3   -2.10    2.70
   1  12  -3  123.19    7.10
   1  12  -3  138.39    6.00
   1  12  -3  141.79    6.60
   1  12  -3  137.89    5.60
   1  12  -3  128.59    8.50
  -1 -12   3  142.79    6.60
  -1 -12   3  142.99    7.30
   0  12  -3   51.59    3.60
   0  12  -3   48.80    3.50
   0  12  -3   61.49    5.50
   0  12  -3   34.90    5.80
   0  12  -3   42.80    6.60
   0 -12   3   48.60    5.40
   0 -12   3   47.00    3.60
  -1  12  -3  289.47   10.50
  -1  12  -3  294.27   10.40
  -1  12  -3  280.17   10.80
  -1  12  -3  241.48   11.00
   1 -12   3  264.97   11.00
   1 -12   3  289.07   13.40
   1 -12   3  277.67   10.70
  -2  12  -3   67.79    4.40
  -2  12  -3   63.49    4.90
  -2  12  -3   67.49    4.50
   2 -12   3   45.10    8.20
   2 -12   3   51.69    6.40
   2 -12   3   74.19    7.40
  -3  12  -3    9.30    2.20
  -3  12  -3   12.20    2.20
   3 -12   3   13.70    2.80
   3 -12   3    9.30    3.70
   3 -12   3   15.60    4.00
  -4  12  -3    2.70    1.80
  -4  12  -3    4.40    1.70
  -4  12  -3    6.90    1.40
   4 -12   3    4.00    2.00
   4 -12   3    4.40    2.60
   4 -12   3    5.30    3.30
  -5  12  -3    8.30    2.00
  -5  12  -3    4.20    4.10
   5 -12   3    7.50    2.20
   5 -12   3   11.00    2.00
   5  11  -3   10.40    1.70
   5  11  -3   11.30    1.80
   5  11  -3   12.50    1.80
  -5 -11   3   11.50    4.30
   4  11  -3    1.00    1.10
   4  11  -3    3.60    1.80
   4  11  -3    3.20    2.40
  -4 -11   3    1.30    3.40
  -4 -11   3    3.90    2.70
   3  11  -3   37.70    3.80
   3  11  -3   32.00    4.80
   3  11  -3   25.90    4.40
   3  11  -3   31.20    3.00
  -3 -11   3   32.80    3.60
  -3 -11   3   30.80    5.50
   2  11  -3   32.80    3.70
   2  11  -3   36.10    3.20
   2  11  -3   37.30    5.10
   2  11  -3   39.40    3.90
   2  11  -3   37.30    3.30
   2  11  -3   33.50    5.50
  -2 -11   3   40.80    5.20
  -2 -11   3   37.40    6.60
  -2 -11   3   36.10    3.80
   1  11  -3  183.08    7.60
   1  11  -3  177.08    7.40
   1  11  -3  167.08    8.20
   1  11  -3  164.28    8.30
   1  11  -3  175.28    6.90
   1  11  -3  173.18    7.30
  -1 -11   3  169.48   10.00
  -1 -11   3  171.38    7.10
   0  11  -3  100.39    5.50
   0  11  -3   97.59    5.40
   0  11  -3   87.19    6.00
   0  11  -3   95.29    5.70
   0  11  -3   97.29    5.00
   0  11  -3   91.49    6.40
   0  11  -3   96.39    7.10
   0 -11   3   96.49    4.70
   0 -11   3   97.19    7.30
   0 -11   3  106.79    6.40
  -1  11  -3   43.50    4.70
  -1  11  -3   38.40    4.60
  -1  11  -3   33.30    5.60
  -1  11  -3   36.00    3.20
  -1  11  -3   34.90    3.60
   1 -11   3   39.60    7.60
   1 -11   3   29.80    4.60
   1 -11   3   38.10    4.70
  -2  11  -3  209.28    9.50
  -2  11  -3  227.78    8.90
  -2  11  -3  225.68    8.70
  -2  11  -3  215.88    8.80
   2 -11   3  212.48   11.00
   2 -11   3  190.98   11.00
   2 -11   3  223.38   11.60
   2 -11   3  191.38    9.70
   2 -11   3  211.48   10.70
   2 -11   3  204.28   11.00
  -3  11  -3    9.50    2.60
  -3  11  -3    9.60    4.40
  -3  11  -3    0.20    3.60
  -3  11  -3    9.60    2.60
   3 -11   3    9.50    3.90
   3 -11   3   13.30    4.30
   3 -11   3   13.60    4.10
  -4  11  -3   13.20    2.40
  -4  11  -3   12.70    2.80
  -4  11  -3    9.80    2.70
   4 -11   3   12.20    3.30
   4 -11   3   10.00    3.70
   4 -11   3   13.30    3.10
  -5  11  -3    0.80    2.00
  -5  11  -3    3.70    3.50
  -5  11  -3    1.50    2.10
   5 -11   3    1.80    1.70
   5 -11   3    2.70    1.70
   5 -11   3    6.30    2.80
  -6  11  -3   79.59    3.50
   6 -11   3   70.89    3.50
   6 -11   3   81.99    4.70
   6  10  -3   68.09    3.80
   6  10  -3   74.89    3.30
   6  10  -3   67.69    3.30
   5  10  -3    2.90    1.40
   5  10  -3    1.50    1.80
  -5 -10   3    4.10    2.60
  -5 -10   3    0.60    3.90
   4  10  -3    7.50    2.40
   4  10  -3    6.90    2.10
   4  10  -3    6.10    3.10
  -4 -10   3    8.10    2.50
  -4 -10   3    3.70    3.40
   3  10  -3   68.19    5.50
   3  10  -3   86.39    6.20
   3  10  -3   79.49    4.70
   3  10  -3   79.99    4.80
   3  10  -3   82.99    5.10
  -3 -10   3   79.29    4.40
  -3 -10   3   84.39    8.90
   2  10  -3    8.00    2.10
   2  10  -3   15.50    3.10
   2  10  -3   10.80    3.00
   2  10  -3   15.00    2.50
   2  10  -3    9.80    2.00
   2  10  -3   11.70    2.60
  -2 -10   3   11.70    4.30
  -2 -10   3   13.20    3.30
  -2 -10   3   13.80    2.30
   1  10  -3  100.89    6.40
   1  10  -3  108.99    5.80
   1  10  -3  115.89    5.50
   1  10  -3  104.59    5.60
   1  10  -3  102.99    5.30
   1  10  -3  100.69    4.80
  -1 -10   3  111.09    7.10
  -1 -10   3  111.39    6.90
  -1 -10   3  112.09    5.30
   0  10  -3    3.50    3.40
   0  10  -3   10.20    1.90
   0  10  -3    9.10    2.40
   0  10  -3    8.10    2.50
   0  10  -3   13.00    3.20
   0  10  -3   14.30    2.30
   0  10  -3    9.90    2.30
   0 -10   3    4.90    3.30
   0 -10   3   16.20    2.80
   0 -10   3    8.60    3.50
  -1  10  -3  123.99    6.00
  -1  10  -3  119.49    6.00
  -1  10  -3  111.89    5.90
  -1  10  -3  123.69    5.70
  -1  10  -3  115.29    6.20
   1 -10   3  125.39    5.50
   1 -10   3  100.29    8.70
   1 -10   3  122.99    6.70
   1 -10   3  120.09    7.10
  -2  10  -3  104.89    5.90
  -2  10  -3  102.59    5.50
  -2  10  -3  109.59    5.60
  -2  10  -3  104.79    6.00
  -2  10  -3   98.89    5.20
  -2  10  -3   93.49    6.50
   2 -10   3  103.69    8.50
   2 -10   3  110.79    6.70
   2 -10   3   94.99    6.30
   2 -10   3   92.89    8.30
   2 -10   3   99.29    7.30
  -3  10  -3   31.00    4.10
  -3  10  -3   39.40    4.60
  -3  10  -3   27.80    3.10
  -3  10  -3   26.40    4.80
  -3  10  -3   32.90    4.20
   3 -10   3   32.00    6.30
   3 -10   3   31.70    5.80
   3 -10   3   26.00    4.60
   3 -10   3   28.40    5.80
  -4  10  -3    6.90    4.70
  -4  10  -3    6.20    2.00
  -4  10  -3    4.90    3.30
  -4  10  -3   11.00    3.10
  -4  10  -3   10.00    2.20
   4 -10   3    8.30    3.50
   4 -10   3    0.40    3.50
   4 -10   3   10.10    3.80
  -5  10  -3   -0.50    5.20
  -5  10  -3    6.40    3.40
  -5  10  -3    5.70    2.40
   5 -10   3    9.60    2.70
   5 -10   3    8.20    2.70
   5 -10   3    4.80    3.00
  -6  10  -3   24.70    3.00
  -6  10  -3   26.70    3.00
   6 -10   3   27.50    3.00
   6 -10   3   26.10    2.80
   6   9  -3   44.60    3.20
   6   9  -3   54.19    3.10
   6   9  -3   45.30    4.20
  -5  -9   3  118.09    5.50
  -5  -9   3  126.59    8.30
   4   9  -3    8.40    3.00
   4   9  -3    3.60    2.90
   4   9  -3    7.50    2.40
   4   9  -3    2.80    1.80
  -4  -9   3    3.40    2.20
  -4  -9   3    5.70    4.10
   3   9  -3  164.58    7.20
   3   9  -3  177.28    7.90
   3   9  -3  170.58    7.30
   3   9  -3  174.08    8.00
   3   9  -3  172.88    8.30
  -3  -9   3  187.28   11.00
  -3  -9   3  170.88    8.00
  -3  -9   3  169.58    6.80
   2   9  -3   66.49    4.10
   2   9  -3   62.99    3.90
   2   9  -3   62.59    4.80
   2   9  -3   62.39    4.20
   2   9  -3   62.79    3.90
   2   9  -3   71.89    4.40
   2   9  -3   71.59    5.30
  -2  -9   3   60.39    6.10
  -2  -9   3   64.29    5.50
   1   9  -3   36.40    3.20
   1   9  -3   36.10    3.90
   1   9  -3   36.10    3.10
   1   9  -3   34.30    3.20
  -1  -9   3   34.20    3.30
  -1  -9   3   33.00    5.00
  -1  -9   3   31.10    4.00
   0   9  -3   49.60    5.50
   0   9  -3   43.30    3.30
   0   9  -3   37.70    3.70
   0   9  -3   41.60    3.60
   0   9  -3   41.40    5.50
   0   9  -3   39.10    3.40
   0  -9   3   44.10    3.40
   0  -9   3   49.40    5.30
   0  -9   3   45.30    4.20
  -1   9  -3  117.79    5.50
  -1   9  -3  110.79    5.10
  -1   9  -3  101.29    5.40
  -1   9  -3  112.89    5.10
   1  -9   3   98.79    8.80
   1  -9   3  118.19    5.30
   1  -9   3  111.79    6.80
   1  -9   3  109.59    6.10
  -2   9  -3  112.39    4.90
  -2   9  -3  109.99    5.20
  -2   9  -3  101.19    5.70
  -2   9  -3  108.39    5.80
  -2   9  -3  111.29    5.40
  -2   9  -3  108.59    5.40
   2  -9   3  105.59    6.10
   2  -9   3  106.69    5.70
   2  -9   3  103.59    8.00
   2  -9   3  106.39    6.10
  -3   9  -3   66.89    4.70
  -3   9  -3   67.29    4.40
  -3   9  -3   59.29    4.70
  -3   9  -3   70.09    5.00
  -3   9  -3   62.29    5.60
   3  -9   3   64.89    6.40
   3  -9   3   67.79   10.60
   3  -9   3   57.39    6.20
   3  -9   3   75.29    7.20
   3  -9   3   65.79    6.50
  -4   9  -3   21.10    3.50
  -4   9  -3   15.60    3.10
  -4   9  -3   19.50    3.20
  -4   9  -3   17.80    3.70
  -4   9  -3   18.10    3.10
   4  -9   3   15.60    3.80
   4  -9   3   15.80    3.70
   4  -9   3   16.00    4.40
  -5   9  -3   30.10    5.50
  -5   9  -3   36.90    3.40
  -5   9  -3   31.20    3.10
   5  -9   3   42.10    5.60
   5  -9   3   39.40    5.00
   5  -9   3   33.30    5.10
  -6   9  -3    6.60    3.10
  -6   9  -3    7.20    1.60
   6  -9   3    9.00    1.90
   6  -9   3    7.00    2.10
  -7   9  -3   84.89    3.70
  -7   9  -3   75.19    4.20
   7  -9   3   83.09    3.50
   7  -9   3   65.49    5.00
   7  -9   3   77.79    3.70
   7   8  -3   62.29    3.10
   7   8  -3   67.19    3.50
   6   8  -3   10.40    2.90
   6   8  -3   13.00    2.30
   6   8  -3   12.80    2.00
   5   8  -3   52.59    4.40
   5   8  -3   61.59    5.20
   5   8  -3   51.69    3.70
  -5  -8   3   52.79    3.90
   4   8  -3    8.40    1.90
   4   8  -3   12.60    3.10
   4   8  -3   16.50    3.00
   4   8  -3   11.00    2.30
  -4  -8   3   13.30    3.90
  -4  -8   3   11.80    2.10
   3   8  -3   77.49    4.60
   3   8  -3   79.69    5.20
   3   8  -3   76.39    5.50
   3   8  -3   78.29    4.30
   3   8  -3   76.99    4.50
  -3  -8   3   78.49    4.20
  -3  -8   3   81.49    4.80
  -3  -8   3   81.59    5.40
   2   8  -3  222.68    8.90
   2   8  -3  209.68    8.20
   2   8  -3  217.28    8.60
   2   8  -3  219.68    9.00
   2   8  -3  224.28    8.20
   2   8  -3  215.18    8.30
   2   8  -3  200.58    7.80
  -2  -8   3  202.48    8.40
  -2  -8   3  214.38    7.80
  -2  -8   3  215.58    8.80
   1   8  -3   50.39    3.80
   1   8  -3   52.59    4.10
   1   8  -3   53.29    4.70
   1   8  -3   55.99    3.40
   1   8  -3   53.89    3.90
   1   8  -3   52.69    3.50
   1   8  -3   53.79    2.90
   1   8  -3   48.90    3.10
  -1  -8   3   57.79    4.00
  -1  -8   3   47.60    4.60
  -1  -8   3   54.39    3.30
  -1  -8   3   53.69    3.80
   0   8  -3    3.50    1.80
   0   8  -3    5.50    2.10
   0   8  -3    3.80    1.40
   0   8  -3    4.70    1.40
   0   8  -3    6.40    3.40
   0   8  -3    6.10    2.40
   0   8  -3    6.40    2.00
   0   8  -3    2.90    2.70
   0   8  -3    6.00    1.40
   0   8  -3    6.90    1.50
   0  -8   3    5.70    1.90
   0  -8   3    2.30    1.80
   0  -8   3    3.40    1.50
   0  -8   3    5.90    2.60
  -1   8  -3   22.60    2.30
  -1   8  -3   15.00    2.90
  -1   8  -3   23.70    2.50
  -1   8  -3   18.50    2.60
  -1   8  -3   18.30    3.60
  -1   8  -3   21.20    2.40
  -1   8  -3   21.40    2.90
  -1   8  -3   31.00    4.40
  -1   8  -3   25.60    2.40
   1  -8   3   26.70    3.10
   1  -8   3   29.50    4.40
   1  -8   3   13.60    4.30
   1  -8   3   24.20    2.80
   1  -8   3   18.40    6.20
  -2   8  -3  192.58    8.60
  -2   8  -3  184.88    7.30
  -2   8  -3  187.68    7.10
  -2   8  -3  185.38    7.70
  -2   8  -3  190.28    7.60
   2  -8   3  187.78    7.30
   2  -8   3  171.58    9.30
   2  -8   3  183.68    9.40
   2  -8   3  188.38    7.80
   2  -8   3  180.58    8.20
   2  -8   3  186.98    9.70
  -3   8  -3   50.69    4.90
  -3   8  -3   43.40    3.30
  -3   8  -3   40.10    4.20
  -3   8  -3   43.70    3.30
  -3   8  -3   43.30    3.70
   3  -8   3   57.59    6.30
   3  -8   3   45.10    5.40
   3  -8   3   47.10    7.10
   3  -8   3   46.40    5.80
  -4   8  -3   29.50    4.30
  -4   8  -3   23.90    3.10
  -4   8  -3   22.90    4.30
  -4   8  -3   19.70    3.40
  -4   8  -3   27.00    4.40
   4  -8   3   27.10    5.00
   4  -8   3   21.70    4.40
   4  -8   3   22.90    4.10
  -5   8  -3   95.69    4.80
  -5   8  -3   92.39    7.40
  -5   8  -3  100.89    6.20
  -5   8  -3   95.29    6.00
  -5   8  -3  102.09    7.30
  -5   8  -3  107.99    6.20
   5  -8   3  109.39    6.30
   5  -8   3   98.39    7.30
   5  -8   3   97.69    6.70
  -6   8  -3   -2.40    4.00
  -6   8  -3    0.30    1.90
  -6   8  -3   -2.80    7.20
  -6   8  -3    2.20    2.20
   6  -8   3   -2.80    1.90
   6  -8   3    3.80    1.80
   6  -8   3    1.90    2.50
  -7   8  -3   -0.40    1.70
  -7   8  -3    6.30    3.30
   7  -8   3   -1.40    1.10
   7  -8   3    0.20    1.50
   7  -8   3    0.10    1.00
   7   7  -3  103.69    4.70
   7   7  -3   97.39    4.20
   6   7  -3   17.70    4.70
   6   7  -3   16.90    4.10
   5   7  -3    7.40    2.30
   5   7  -3   12.10    4.60
   5   7  -3    7.50    3.20
   5   7  -3    8.10    1.90
  -5  -7   3    2.30    5.00
  -5  -7   3    9.60    2.30
   4   7  -3   11.30    2.90
   4   7  -3   11.40    2.40
   4   7  -3   10.00    1.90
   4   7  -3   18.50    3.20
  -4  -7   3   12.90    2.00
   3   7  -3  186.28    8.40
   3   7  -3  200.18    8.30
   3   7  -3  194.28    7.50
   3   7  -3  197.68    8.40
   3   7  -3  199.18    7.80
   3   7  -3  192.98    7.60
  -3  -7   3  186.18    6.90
  -3  -7   3  184.38    7.80
   2   7  -3   73.59    4.00
   2   7  -3   76.89    4.60
   2   7  -3   62.99    4.50
   2   7  -3   64.49    4.80
   2   7  -3   73.99    4.10
   2   7  -3   72.99    3.80
   2   7  -3   72.49    3.80
  -2  -7   3   68.59    4.20
  -2  -7   3   72.59    3.20
  -2  -7   3   75.89    3.50
  -2  -7   3   76.39    4.40
  -2  -7   3   74.49    4.10
   1   7  -3  495.55   15.90
   1   7  -3  464.75   15.90
   1   7  -3  455.45   15.60
   1   7  -3  472.35   16.10
   1   7  -3  465.25   16.30
   1   7  -3  484.15   15.40
   1   7  -3  396.26   18.30
   1   7  -3  465.75   15.80
  -1  -7   3  487.45   16.20
  -1  -7   3  497.85   16.20
  -1  -7   3  475.55   16.10
  -1  -7   3  492.55   15.40
  -1  -7   3  487.25   15.50
   0   7  -3   18.80    3.00
   0   7  -3   19.00    1.80
   0   7  -3   18.50    1.80
   0   7  -3   18.80    3.40
   0   7  -3   15.60    2.70
   0   7  -3   16.10    2.00
   0   7  -3   17.70    2.40
   0   7  -3   18.80    3.70
   0  -7   3   22.40    2.10
   0  -7   3   17.50    2.30
   0  -7   3   16.20    3.10
   0  -7   3   21.40    2.40
   0  -7   3   22.50    3.80
  -1   7  -3   55.79    3.70
  -1   7  -3   54.99    3.90
  -1   7  -3   57.59    4.00
  -1   7  -3   55.99    3.70
  -1   7  -3   54.09    3.30
  -1   7  -3   57.59    2.90
   1  -7   3   55.69    3.10
   1  -7   3   48.50    5.30
   1  -7   3   49.60    3.50
   1  -7   3   64.29    3.50
  -2   7  -3   64.49    5.30
  -2   7  -3   79.19    3.60
  -2   7  -3   67.89    3.90
  -2   7  -3   73.19    3.50
  -2   7  -3   72.89    4.40
  -2   7  -3   74.99    4.00
  -2   7  -3   69.49    4.50
  -2   7  -3   75.49    3.60
   2  -7   3   73.99    3.90
   2  -7   3   70.19    4.20
   2  -7   3   77.79    4.00
   2  -7   3   81.69    6.90
   2  -7   3   74.79    5.10
   2  -7   3   71.49    6.50
   2  -7   3   83.89    7.80
  -3   7  -3   75.69    4.10
  -3   7  -3   69.59    3.90
  -3   7  -3   77.09    4.80
  -3   7  -3   73.19    3.60
  -3   7  -3   73.79    4.00
  -3   7  -3   71.49    5.70
  -3   7  -3   71.49    4.40
   3  -7   3   67.89    6.00
   3  -7   3   66.69    7.60
   3  -7   3   68.99    5.80
   3  -7   3   84.09    7.30
   3  -7   3   72.69    5.00
  -4   7  -3   48.90    3.90
  -4   7  -3   40.00    5.70
  -4   7  -3   46.70    3.00
  -4   7  -3   46.40    4.50
  -4   7  -3   46.10    3.90
  -4   7  -3   43.20    4.20
   4  -7   3   42.50    4.90
   4  -7   3   54.09    6.20
   4  -7   3   42.50    5.60
  -5   7  -3   41.00    3.10
  -5   7  -3   39.80    3.90
  -5   7  -3   42.00    4.70
  -5   7  -3   31.10    4.50
  -5   7  -3   42.10    5.60
   5  -7   3   47.00    6.00
   5  -7   3   47.40    4.80
   5  -7   3   35.70    5.30
  -6   7  -3   30.80    2.90
  -6   7  -3   24.10    4.50
  -6   7  -3   31.60    5.30
   6  -7   3   34.30    3.90
   6  -7   3   38.30    5.20
   6  -7   3   31.40    4.70
  -7   7  -3   26.40    2.50
  -7   7  -3   30.20    4.90
   7  -7   3   25.00    2.40
   7  -7   3   26.20    3.10
   7  -7   3   23.40    2.80
   7   6  -3  138.39    5.50
   7   6  -3  142.39    5.90
   7   6  -3  121.49    6.70
   6   6  -3    5.90    1.90
   6   6  -3    6.20    2.30
   6   6  -3    9.80    4.40
   6   6  -3    9.10    3.50
   5   6  -3   22.60    3.70
   5   6  -3   19.90    4.00
   5   6  -3   23.60    3.40
   5   6  -3   20.00    3.60
  -5  -6   3   11.70    4.70
   4   6  -3   57.29    3.90
   4   6  -3   50.29    7.90
  -4  -6   3   61.59    3.10
   3   6  -3  160.08    6.50
   3   6  -3  150.58    7.30
   3   6  -3  161.08    6.40
   3   6  -3  170.78    6.50
   3   6  -3  159.78    7.30
  -3  -6   3  160.18    5.70
  -3  -6   3  168.18    6.60
   2   6  -3  333.07   12.90
   2   6  -3  344.97   11.30
   2   6  -3  353.06   12.80
   2   6  -3  353.16   12.30
   2   6  -3  341.07   12.30
   2   6  -3  376.76   12.20
  -2  -6   3  316.07   11.60
  -2  -6   3  359.16   11.50
  -2  -6   3  381.66   11.80
  -2  -6   3  383.96   12.30
   1   6  -3   40.90    2.20
   1   6  -3   39.90    2.40
   1   6  -3   43.30    2.30
   1   6  -3   42.50    2.10
  -1  -6   3   42.60    2.40
  -1  -6   3   44.50    2.80
  -1  -6   3   43.80    2.90
  -1  -6   3   41.20    2.30
  -1  -6   3   38.90    4.00
   0   6  -3   59.69    2.80
   0   6  -3   60.99    2.50
   0   6  -3   58.29    2.90
   0   6  -3   56.99    2.70
   0   6  -3   55.19    2.90
   0   6  -3   57.89    2.50
   0  -6   3   56.59    4.20
   0  -6   3   53.09    4.00
   0  -6   3   61.09    2.70
   0  -6   3   61.99    2.90
  -1   6  -3    0.90    1.50
  -1   6  -3   -0.20    1.70
  -1   6  -3    4.10    1.20
  -1   6  -3    1.90    0.70
  -1   6  -3    1.50    0.90
  -1   6  -3    2.80    0.90
   1  -6   3    2.50    1.70
   1  -6   3    1.00    1.30
   1  -6   3    3.00    1.00
   1  -6   3    2.60    2.20
   1  -6   3    1.90    1.00
   1  -6   3    1.20    1.10
  -2   6  -3  242.08    9.20
  -2   6  -3  247.18    8.70
  -2   6  -3  245.38    8.60
  -2   6  -3  245.58    8.40
  -2   6  -3  251.27    8.60
  -2   6  -3  230.78    9.20
   2  -6   3  252.87    8.80
   2  -6   3  245.78    9.40
   2  -6   3  252.67    8.70
   2  -6   3  244.08    8.70
   2  -6   3  242.68   11.00
   2  -6   3  257.37    9.00
  -3   6  -3   44.60    3.50
  -3   6  -3   47.70    2.80
  -3   6  -3   42.50    4.30
  -3   6  -3   48.70    4.80
  -3   6  -3   46.60    2.90
  -3   6  -3   46.40    3.90
  -3   6  -3   49.30    3.30
   3  -6   3   53.39    5.80
   3  -6   3   45.00    4.50
   3  -6   3   50.39    5.10
   3  -6   3   45.60    3.30
   3  -6   3   38.80    7.10
   3  -6   3   37.70    4.80
  -4   6  -3  156.38    6.60
  -4   6  -3  150.58    8.70
  -4   6  -3  154.98    6.00
  -4   6  -3  156.38    6.10
  -4   6  -3  151.18    6.80
   4  -6   3  141.49    9.90
   4  -6   3  132.99    9.30
   4  -6   3  155.08    7.40
  -5   6  -3  136.69    7.50
  -5   6  -3  143.59    5.90
  -5   6  -3  150.58    6.10
  -5   6  -3  159.28    8.70
  -5   6  -3  147.99    7.00
   5  -6   3  136.19    7.90
   5  -6   3  147.89    9.30
   5  -6   3  146.09    7.10
  -6   6  -3   19.60    3.00
  -6   6  -3   18.10    2.80
  -6   6  -3   15.90    3.60
  -6   6  -3   15.00    3.10
  -6   6  -3    9.80    5.50
   6  -6   3   21.20    3.50
   6  -6   3   19.10    3.50
  -7   6  -3    0.80    1.50
  -7   6  -3    3.50    2.70
   7  -6   3    4.30    1.60
   7  -6   3    2.00    1.30
   8   5  -3    3.20    1.30
   7   5  -3  253.57    9.50
   7   5  -3  254.67    9.10
   7   5  -3  242.98    9.70
   6   5  -3   24.30    3.40
   6   5  -3   17.30    3.60
   6   5  -3   19.80    3.50
   5   5  -3   78.59    4.80
   5   5  -3   80.39    6.20
   5   5  -3   76.49    6.20
   5   5  -3   84.09    4.60
  -5  -5   3   79.49    5.90
   4   5  -3   30.50    4.60
   4   5  -3   26.20    3.00
   4   5  -3   27.80    3.40
   4   5  -3   27.40    4.90
   4   5  -3   30.80    2.70
   3   5  -3  531.95   17.00
   3   5  -3  512.45   17.60
   3   5  -3  489.15   17.10
   3   5  -3  483.85   16.90
  -3  -5   3  528.95   17.00
  -3  -5   3  517.65   16.90
   2   5  -3 1443.56   44.10
   2   5  -3 1336.07   43.30
   2   5  -3 1431.16   44.30
  -2  -5   3 1366.36   43.60
  -2  -5   3 1414.96   44.00
  -2  -5   3 1379.76   43.50
  -2  -5   3 1401.56   44.20
  -2  -5   3 1407.76   43.50
   1   5  -3    6.30    1.00
   1   5  -3    5.70    1.00
   1   5  -3    6.00    1.10
   1   5  -3    5.00    0.80
  -1  -5   3    6.70    1.00
  -1  -5   3    5.50    0.60
  -1  -5   3    6.30    1.10
  -1  -5   3    6.00    1.00
  -1  -5   3    5.80    0.90
  -1  -5   3    6.20    1.20
   0   5  -3  126.19    4.80
   0   5  -3  132.99    4.80
   0   5  -3  126.79    4.40
   0   5  -3  124.09    4.50
   0   5  -3  132.49    4.80
   0  -5   3  123.29    4.60
   0  -5   3  121.59    4.60
   0  -5   3  128.39    4.50
   0  -5   3  126.19    4.30
   0  -5   3  129.99    4.90
   0  -5   3  126.79    5.00
  -1   5  -3  381.26   12.70
  -1   5  -3  373.56   12.70
  -1   5  -3  386.76   12.80
  -1   5  -3  387.56   12.70
  -1   5  -3  391.76   12.70
  -1   5  -3  384.66   13.00
   1  -5   3  404.86   12.80
   1  -5   3  388.06   12.60
   1  -5   3  405.36   13.00
   1  -5   3  387.86   12.80
   1  -5   3  399.36   13.10
  -2   5  -3  302.37   10.20
  -2   5  -3  320.77   11.10
  -2   5  -3  316.97   10.70
  -2   5  -3  311.37   10.70
  -2   5  -3  319.47   10.40
  -2   5  -3  320.37   10.80
   2  -5   3  299.57   11.20
   2  -5   3  320.27   10.70
   2  -5   3  319.97   10.80
   2  -5   3  313.07   11.30
  -3   5  -3 1129.59   36.80
  -3   5  -3 1195.38   37.20
  -3   5  -3 1171.38   36.50
  -3   5  -3 1065.39   36.20
  -3   5  -3 1155.98   36.00
  -3   5  -3 1098.19   36.70
  -3   5  -3 1168.88   36.60
   3  -5   3 1086.59   37.90
   3  -5   3 1144.19   36.40
   3  -5   3 1166.98   36.30
   3  -5   3 1124.59   37.00
   3  -5   3 1205.68   36.60
   3  -5   3 1080.09   37.40
   3  -5   3 1171.98   36.60
  -4   5  -3   43.20    3.00
  -4   5  -3   44.80    3.40
  -4   5  -3   40.50    4.30
  -4   5  -3   44.90    4.40
  -4   5  -3   43.00    3.10
  -4   5  -3   41.20    3.60
   4  -5   3   46.90    5.80
   4  -5   3   42.80    5.20
   4  -5   3   44.10    4.30
   4  -5   3   46.50    8.30
  -5   5  -3   23.90    4.40
  -5   5  -3   20.60    2.70
  -5   5  -3   19.70    3.90
  -5   5  -3   23.20    3.20
   5  -5   3   22.60    3.00
   5  -5   3   32.00    5.00
   5  -5   3   15.50    3.70
   5  -5   3   26.40    5.10
  -6   5  -3   18.30    4.70
  -6   5  -3   21.10    3.20
  -6   5  -3   28.30    4.70
  -6   5  -3   22.10    2.80
  -6   5  -3   29.50    5.00
   6  -5   3   17.60    3.90
   6  -5   3   23.20    4.80
   6  -5   3   21.60    3.40
  -7   5  -3   15.90    3.80
  -7   5  -3   18.80    3.50
  -7   5  -3   23.20    2.50
   7  -5   3   18.00    2.30
   7  -5   3   20.60    3.30
   7  -5   3   17.00    3.20
   7  -5   3   18.90    3.40
  -8   5  -3    2.00    1.50
  -8   5  -3    3.80    1.30
   8  -5   3    3.00    1.10
   8   4  -3   14.40    2.60
   8   4  -3   11.70    2.20
   7   4  -3   55.29    5.10
   6   4  -3   22.50    3.70
   6   4  -3   29.60    4.00
   6   4  -3   22.80    3.30
   5   4  -3   25.10    4.40
   5   4  -3   23.40    3.60
   5   4  -3   18.40    2.90
   5   4  -3   20.80    4.10
  -5  -4   3   23.30    4.50
   4   4  -3   85.19    4.40
   4   4  -3   88.79    4.10
   4   4  -3   92.29    6.10
   4   4  -3   81.49    5.80
   4   4  -3   87.59    4.80
  -4  -4   3   80.19    4.70
  -4  -4   3   84.29    4.00
   3   4  -3   52.59    2.60
  -3  -4   3   46.10    2.80
  -3  -4   3   49.90    2.80
  -2  -4   3 2706.53   87.49
  -2  -4   3 2944.91   87.99
   1   4  -3  211.38    6.90
   1   4  -3  221.28    7.50
   1   4  -3  206.18    7.20
   1   4  -3  220.68    7.30
   1   4  -3  211.88    6.90
  -1  -4   3  212.28    6.90
  -1  -4   3  205.08    7.00
  -1  -4   3  215.58    7.10
  -1  -4   3  215.08    6.80
  -1  -4   3  219.08    6.90
   0   4  -3  281.47    9.10
   0   4  -3  278.47    9.30
   0   4  -3  286.97    9.10
   0   4  -3  285.17    9.00
   0   4  -3  285.07    9.40
   0  -4   3  284.87    9.40
   0  -4   3  297.87    9.20
   0  -4   3  276.67    9.20
   0  -4   3  285.77    9.10
   0  -4   3  261.77    9.20
  -1   4  -3 1221.38   38.10
  -1   4  -3 1205.18   38.50
  -1   4  -3 1187.78   37.90
  -1   4  -3 1201.58   37.80
  -1   4  -3 1174.68   37.80
  -1   4  -3 1204.98   37.80
  -1   4  -3 1191.68   37.80
   1  -4   3 1223.58   37.90
   1  -4   3 1216.68   38.00
   1  -4   3 1215.08   37.80
   1  -4   3 1244.98   37.90
  -2   4  -3    3.40    1.20
  -2   4  -3    3.20    1.30
  -2   4  -3    3.20    0.90
  -2   4  -3    3.80    0.80
  -2   4  -3    3.00    0.80
   2  -4   3    2.90    1.20
   2  -4   3    3.60    1.40
   2  -4   3    4.70    1.00
   2  -4   3    1.50    2.60
   2  -4   3    2.70    1.00
   2  -4   3    3.90    0.90
   2  -4   3    2.60    0.80
  -3   4  -3  529.65   17.10
  -3   4  -3  521.05   17.10
  -3   4  -3  521.35   17.00
  -3   4  -3  534.65   17.90
  -3   4  -3  532.15   17.70
  -3   4  -3  523.15   17.40
   3  -4   3  558.94   17.70
   3  -4   3  531.45   17.50
   3  -4   3  524.95   17.40
   3  -4   3  526.35   17.20
  -4   4  -3  563.44   19.70
  -4   4  -3  598.84   18.80
  -4   4  -3  592.14   19.70
  -4   4  -3  578.84   20.10
  -4   4  -3  599.84   18.80
   4  -4   3  559.14   19.50
   4  -4   3  569.84   20.10
   4  -4   3  581.54   20.30
   4  -4   3  561.14   20.60
   4  -4   3  565.34   20.50
  -5   4  -3   17.60    3.60
  -5   4  -3   17.00    4.40
  -5   4  -3   23.90    2.80
   5  -4   3   22.10    4.10
   5  -4   3   11.00    3.20
   5  -4   3   16.10    2.60
  -6   4  -3   52.09    5.50
  -6   4  -3   51.39    6.90
  -6   4  -3   61.99    4.10
   6  -4   3   63.69    5.80
   6  -4   3   51.79    4.00
   6  -4   3   60.99    5.90
  -7   4  -3    9.50    2.30
  -7   4  -3    8.00    4.30
  -7   4  -3    3.50    1.50
   7  -4   3    5.30    2.20
   7  -4   3    5.50    2.30
   7  -4   3   10.20    2.00
   7  -4   3    7.60    2.10
  -8   4  -3    1.50    1.40
  -8   4  -3    1.20    1.90
   8  -4   3   -0.60    1.40
   8  -4   3    0.40    2.70
   8   3  -3   20.40    2.60
   8   3  -3   26.90    2.50
   7   3  -3   31.20    3.30
   7   3  -3   30.90    4.70
   6   3  -3   19.40    3.70
   6   3  -3   12.60    3.50
   6   3  -3   17.20    3.50
  -6  -3   3   19.90    3.30
   5   3  -3   11.40    3.90
   5   3  -3   11.70    2.00
   5   3  -3   18.70    3.40
   5   3  -3   19.20    2.80
   5   3  -3   12.40    4.10
  -5  -3   3   13.30    2.30
   4   3  -3  168.58    7.30
   4   3  -3  150.48    7.40
   4   3  -3  149.59    6.90
  -4  -3   3  155.28    5.80
  -4  -3   3  156.78    6.40
  -4  -3   3  152.38    6.30
   3   3  -3  425.06   14.20
   3   3  -3  422.96   14.00
  -3  -3   3  428.06   14.00
   2   3  -3   10.70    1.00
   2   3  -3    8.40    1.40
  -2  -3   3    7.80    1.00
   1   3  -3  352.66   11.10
   1   3  -3  340.17   10.80
   1   3  -3  340.77   10.80
   1   3  -3  340.37   11.30
  -1  -3   3  338.17   10.80
  -1  -3   3  338.47   10.80
  -1  -3   3  339.07   10.90
  -1  -3   3  344.67   10.80
  -1  -3   3  343.67   10.90
   0   3  -3   37.70    1.50
   0   3  -3   36.80    1.50
   0   3  -3   37.50    1.40
   0   3  -3   34.10    1.90
   0   3  -3   36.90    1.70
   0  -3   3   38.20    1.70
   0  -3   3   35.50    1.70
   0  -3   3   38.00    1.90
   0  -3   3   38.60    1.50
   0  -3   3   39.80    1.70
  -1   3  -3   79.09    3.10
  -1   3  -3   70.39    2.90
  -1   3  -3   75.19    2.80
  -1   3  -3   78.79    3.80
  -1   3  -3   76.09    2.90
   1  -3   3   67.49    2.90
   1  -3   3   76.19    3.00
   1  -3   3   76.39    2.90
   1  -3   3   76.29    2.80
   1  -3   3   79.59    3.10
  -2   3  -3  103.09    4.00
  -2   3  -3  100.49    3.80
  -2   3  -3  106.09    4.60
  -2   3  -3  106.69    4.30
   2  -3   3  104.99    4.40
   2  -3   3  108.99    4.20
   2  -3   3  103.99    3.80
   2  -3   3  108.99    4.00
   2  -3   3   94.39    4.10
   2  -3   3  105.29    3.90
  -3   3  -3  507.55   16.90
  -3   3  -3  484.45   15.90
  -3   3  -3  511.75   16.50
  -3   3  -3  497.85   16.10
  -3   3  -3  497.55   15.90
   3  -3   3  477.85   16.10
   3  -3   3  495.85   16.20
   3  -3   3  515.75   16.50
   3  -3   3  470.15   16.50
   3  -3   3  471.85   15.70
  -4   3  -3  409.36   14.70
  -4   3  -3  388.96   13.90
  -4   3  -3  389.76   13.00
  -4   3  -3  395.36   13.00
  -4   3  -3  397.26   14.50
   4  -3   3  385.66   13.70
   4  -3   3  374.86   14.70
   4  -3   3  396.46   13.70
   4  -3   3  385.96   14.50
   4  -3   3  382.46   14.80
   4  -3   3  398.56   14.60
  -5   3  -3   47.90    6.70
  -5   3  -3   50.99    3.40
  -5   3  -3   56.39    3.50
  -5   3  -3   47.30    4.90
   5  -3   3   67.59    6.10
   5  -3   3   50.59    5.40
   5  -3   3   54.49    5.40
   5  -3   3   53.29    4.40
  -6   3  -3   53.29    3.90
  -6   3  -3   51.19    3.90
  -6   3  -3   56.59    6.50
   6  -3   3   52.59    3.70
   6  -3   3   52.19    5.60
   6  -3   3   57.29    5.50
  -7   3  -3   18.90    3.20
  -7   3  -3   15.40    4.70
  -7   3  -3   20.90    2.50
   7  -3   3   19.10    3.70
   7  -3   3   22.20    2.70
   7  -3   3   18.00    3.10
  -8   3  -3    5.70    1.50
   8  -3   3    5.40    2.40
   8  -3   3    3.40    1.10
   8   2  -3    9.10    1.80
   8   2  -3    9.40    1.30
   7   2  -3  321.47   12.70
   7   2  -3  318.57   11.60
  -7  -2   3  326.47   11.20
   6   2  -3   63.99    4.90
   6   2  -3   56.09    5.30
   6   2  -3   62.59    7.30
   6   2  -3   70.39    5.60
  -6  -2   3   64.79    5.90
   5   2  -3  118.49    7.50
   5   2  -3  121.59    7.30
   5   2  -3  131.79    6.70
   5   2  -3  127.09    5.80
   4   2  -3   19.50    3.00
  -4  -2   3   14.70    2.10
  -4  -2   3   15.40    2.20
   3   2  -3   47.10    2.40
   3   2  -3   45.60    2.20
  -3  -2   3   48.10    2.40
   2   2  -3  571.54   18.40
   2   2  -3  593.14   18.60
  -2  -2   3  576.24   18.40
   1   2  -3  401.46   12.60
   1   2  -3  370.16   12.10
   1   2  -3  396.86   12.30
  -1  -2   3  395.26   12.10
  -1  -2   3  387.06   12.20
  -1  -2   3  382.46   12.00
  -1  -2   3  378.86   12.20
   0   2  -3 1621.64   49.70
   0   2  -3 1579.64   50.09
   0  -2   3 1635.24   49.70
   0  -2   3 1557.94   49.70
  -1   2  -3  779.42   24.20
  -1   2  -3  790.42   24.80
  -1   2  -3  802.12   24.40
  -1   2  -3  744.13   24.20
   1  -2   3  763.02   24.30
   1  -2   3  770.52   24.20
   1  -2   3  770.12   24.20
   1  -2   3  777.72   24.40
   1  -2   3  747.43   24.30
  -2   2  -3 1331.27   44.20
  -2   2  -3 1434.36   44.30
  -2   2  -3 1426.66   44.50
  -2   2  -3 1436.56   44.90
   2  -2   3 1453.25   44.50
   2  -2   3 1375.46   44.10
   2  -2   3 1470.35   44.30
   2  -2   3 1421.06   44.30
   2  -2   3 1402.36   44.40
  -3   2  -3  801.62   25.00
  -3   2  -3  743.33   24.80
  -3   2  -3  811.22   25.80
  -3   2  -3  772.22   24.80
  -3   2  -3  801.12   25.30
   3  -2   3  774.32   25.00
   3  -2   3  809.62   25.30
   3  -2   3  760.92   25.20
  -4   2  -3  128.89    6.60
  -4   2  -3  131.59    5.10
  -4   2  -3  125.39    6.30
  -4   2  -3  134.39    5.00
   4  -2   3  125.89    5.50
   4  -2   3  123.49    5.70
   4  -2   3  124.79    7.20
   4  -2   3  122.89    7.00
   4  -2   3  136.99    5.60
   4  -2   3  123.69    7.30
   4  -2   3  135.59    6.80
  -5   2  -3   90.09    6.40
  -5   2  -3   93.99    4.40
  -5   2  -3   90.69    4.40
   5  -2   3   88.39    5.90
   5  -2   3   89.89    5.10
   5  -2   3   90.59    6.10
   5  -2   3   96.59    6.40
  -6   2  -3  143.79    6.10
  -6   2  -3  128.09    8.40
  -6   2  -3  137.09    5.70
   6  -2   3  141.09    7.10
   6  -2   3  132.99    7.60
   6  -2   3  133.39    6.00
   6  -2   3  143.69    7.50
  -7   2  -3   17.10    2.50
  -7   2  -3   13.60    2.30
   7  -2   3   17.10    3.00
   7  -2   3   23.10    4.20
   7  -2   3   18.80    2.80
   7  -2   3   10.50    4.60
  -8   2  -3   67.99    4.70
  -8   2  -3   74.19    3.50
   8  -2   3   76.49    3.80
   8  -2   3   66.49    4.30
   8   1  -3   85.29    5.00
   8   1  -3   70.59    3.60
  -8  -1   3   70.59    5.40
   7   1  -3   13.30    2.70
   7   1  -3    7.00    4.90
   7   1  -3   13.80    2.30
  -7  -1   3    8.30    6.00
  -7  -1   3   12.30    2.30
   6   1  -3   11.90    3.20
   6   1  -3   11.00    2.80
   6   1  -3   10.20    4.10
  -6  -1   3   13.00    3.40
   5   1  -3    6.00    2.60
   5   1  -3   13.20    2.80
   5   1  -3    4.90    3.20
  -5  -1   3    6.90    1.40
  -5  -1   3    5.50    2.60
   4   1  -3    4.00    2.60
  -4  -1   3   10.60    1.90
  -4  -1   3    9.10    1.60
   3   1  -3  351.56   11.60
  -3  -1   3  356.76   11.60
  -3  -1   3  343.07   11.30
   2   1  -3   32.00    1.10
   2   1  -3   28.30    1.60
   2   1  -3   29.40    1.40
   2   1  -3   32.00    1.00
  -2  -1   3   31.90    1.10
  -2  -1   3   31.40    1.10
  -2  -1   3   31.40    1.60
   1   1  -3  819.72   24.90
   1   1  -3  810.72   25.30
   1   1  -3  796.22   25.00
  -1  -1   3  815.22   25.10
  -1  -1   3  763.52   24.90
   0   1  -3   56.39    2.50
   0   1  -3   48.60    1.80
   0   1  -3   44.60    1.80
   0   1  -3   52.79    2.10
   0  -1   3   50.79    1.80
   0  -1   3   52.29    1.90
   0  -1   3   50.19    2.00
   0  -1   3   54.89    2.00
  -1   1  -3  187.08    6.50
  -1   1  -3  173.98    6.00
  -1   1  -3  186.48    6.20
  -1   1  -3  184.58    6.00
   1  -1   3  184.28    6.00
   1  -1   3  188.58    6.10
   1  -1   3  175.58    6.30
   1  -1   3  186.58    6.10
  -2   1  -3   44.40    2.30
  -2   1  -3   44.20    1.90
  -2   1  -3   42.30    2.00
  -2   1  -3   48.80    2.80
   2  -1   3   45.30    2.00
   2  -1   3   48.70    2.00
   2  -1   3   42.70    2.10
   2  -1   3   39.90    2.00
   2  -1   3   44.30    2.20
  -3   1  -3  211.78    8.00
  -3   1  -3  211.98    7.50
  -3   1  -3  195.28    7.10
  -3   1  -3  184.78    7.30
  -3   1  -3  205.98    7.10
   3  -1   3  210.98    7.10
   3  -1   3  203.88    7.10
   3  -1   3  214.48    7.40
   3  -1   3  202.88    7.30
   3  -1   3  221.28    7.20
  -4   1  -3  686.43   23.60
  -4   1  -3  743.63   23.00
  -4   1  -3  715.13   24.20
   4  -1   3  710.93   24.40
   4  -1   3  721.83   24.20
   4  -1   3  680.83   23.30
   4  -1   3  732.43   23.30
   4  -1   3  756.62   23.60
   4  -1   3  719.43   24.20
  -5   1  -3   43.90    3.20
  -5   1  -3   47.50    3.20
  -5   1  -3   44.70    5.30
   5  -1   3   45.10    4.30
   5  -1   3   48.40    4.00
   5  -1   3   51.59    5.10
   5  -1   3   47.50    5.10
   5  -1   3   46.60    4.80
  -6   1  -3   64.69    3.70
  -6   1  -3   68.19    4.10
   6  -1   3   68.59    5.10
   6  -1   3   59.19    5.80
   6  -1   3   53.49    5.50
   6  -1   3   61.49    5.30
   6  -1   3   65.69    4.00
  -7   1  -3   71.49    3.90
  -7   1  -3   69.39    4.50
  -7   1  -3   66.39    4.00
   7  -1   3   72.39    5.50
   7  -1   3   51.59    5.70
  -8   1  -3    1.70    2.60
  -8   1  -3    6.60    1.50
   8  -1   3    4.10    1.40
   8  -1   3    2.80    1.60
   8   0  -3   73.79    3.90
   8   0  -3   72.89    5.10
  -8   0   3   60.49    4.70
   7   0  -3   24.70    4.90
   7   0  -3   34.40    3.90
   7   0  -3   32.30    3.80
  -7   0   3   26.50    5.50
  -7   0   3   31.90    4.00
  -7   0   3   33.30    3.10
   6   0  -3   27.70    4.80
   6   0  -3   21.10    3.80
   6   0  -3   25.10    4.30
  -6   0   3   19.70    3.00
  -6   0   3   19.00    3.40
   5   0  -3   51.19    4.50
   5   0  -3   42.10    5.40
   5   0  -3   54.39    5.20
   5   0  -3   49.10    4.80
  -5   0   3   50.99    4.40
  -5   0   3   52.99    3.00
   4   0  -3  440.46   14.60
   4   0  -3  421.76   15.50
  -4   0   3  441.36   14.80
  -4   0   3  434.96   13.70
   3   0  -3  257.97    8.80
   3   0  -3  262.47    8.30
   3   0  -3  254.77    8.20
   3   0  -3  260.87    8.60
  -3   0   3  234.78    8.30
  -3   0   3  261.37    8.90
  -3   0   3  268.17    8.30
  -3   0   3  267.77    8.80
  -3   0   3  265.97    8.30
   2   0  -3 2312.17   71.89
   1   0  -3    9.30    0.70
   1   0  -3    9.90    0.50
   1   0  -3    9.50    0.80
  -1   0   3    9.50    0.70
  -1   0   3    9.70    0.90
  -1   0   3   10.10    0.70
  -1   0   3   10.00    0.80
  -1   0   3   10.20    0.70
  -1   0   3    9.20    0.80
   0   0  -3 1035.20   32.10
   0   0  -3 1045.80   32.30
   0   0  -3 1033.20   32.10
   0   0   3 1029.40   32.00
   0   0   3 1008.70   32.10
  -1   0  -3  199.48    6.70
  -1   0  -3  195.58    6.20
  -1   0  -3  175.58    6.20
  -1   0  -3  199.28    6.40
   1   0   3  187.38    6.30
   1   0   3  186.28    6.20
   1   0   3  197.58    6.20
   1   0   3  175.18    6.40
  -2   0  -3  855.91   27.60
  -2   0  -3  880.21   27.80
  -2   0  -3  867.21   27.60
  -2   0  -3  881.61   28.20
   2   0   3  900.11   27.60
   2   0   3  869.01   27.30
   2   0   3  857.01   27.60
   2   0   3  902.51   27.60
   2   0   3  863.01   27.80
   2   0   3  904.11   27.40
  -3   0  -3  108.39    4.10
  -3   0  -3  110.19    4.10
  -3   0  -3  101.49    4.20
  -3   0  -3  110.29    4.40
   3   0   3  105.09    4.20
   3   0   3  111.19    4.00
   3   0   3  109.49    4.30
   3   0   3  110.39    4.10
   3   0   3  104.19    4.30
  -4   0  -3   23.60    2.10
  -4   0  -3   17.30    2.60
  -4   0  -3   24.10    3.80
   4   0   3   19.70    3.80
   4   0   3   24.50    4.10
   4   0   3   16.10    2.60
   4   0   3   21.50    3.40
   4   0   3   15.80    2.30
   4   0   3   19.20    3.40
   4   0   3   18.70    2.30
  -5   0  -3   29.00    5.20
  -5   0  -3   24.00    2.90
  -5   0  -3   26.40    2.70
   5   0   3   26.70    3.20
   5   0   3   23.50    4.80
   5   0   3   27.60    4.70
   5   0   3   34.10    4.40
  -6   0  -3    0.90    2.00
  -6   0  -3    4.80   13.50
  -6   0  -3    3.50    1.90
   6   0   3    3.00    2.70
   6   0   3    3.10    2.30
   6   0   3    5.00    3.00
   6   0   3    1.40    1.70
   6   0   3    3.50    2.60
   6   0   3    1.80    3.40
  -7   0  -3   78.99    5.80
  -7   0  -3   78.69    4.30
  -7   0  -3   82.99    4.10
   7   0   3   83.19    4.90
   7   0   3   83.69    5.00
   7   0   3   82.59    5.40
  -8   0  -3   32.10    2.60
   8   0   3   25.40    2.50
   8   0   3   29.20    2.60
   8  -1  -3   12.30    2.90
   8  -1  -3   10.30    1.90
  -8   1   3   11.20    1.90
  -8   1   3   12.60    2.70
   7  -1  -3   37.10    5.20
   7  -1  -3   44.40    7.00
   7  -1  -3   46.60    4.70
  -7   1   3   39.20    6.00
  -7   1   3   35.40    3.70
  -7   1   3   39.70    3.30
   6  -1  -3   41.90    4.50
   6  -1  -3   40.00    5.10
   6  -1  -3   37.50    5.10
   6  -1  -3   42.80    6.00
  -6   1   3   43.50    3.60
  -6   1   3   42.60    3.00
  -6   1   3   43.50    5.00
  -6   1   3   44.10    4.60
   5  -1  -3  537.45   19.90
   5  -1  -3  553.84   19.50
   5  -1  -3  568.14   20.00
   5  -1  -3  528.25   18.60
  -5   1   3  579.04   19.30
  -5   1   3  560.34   18.00
  -5   1   3  568.34   18.30
   4  -1  -3   52.99    3.00
   4  -1  -3   43.60    4.40
   4  -1  -3   44.80    4.30
   4  -1  -3   45.80    4.50
  -4   1   3   47.60    2.40
  -4   1   3   43.50    4.40
  -4   1   3   44.50    2.40
  -4   1   3   48.80    3.40
  -4   1   3   49.20    2.50
   3  -1  -3  418.86   13.90
   3  -1  -3  425.26   14.00
   3  -1  -3  456.85   14.60
  -3   1   3  427.66   14.30
  -3   1   3  441.46   13.90
  -3   1   3  421.26   13.90
  -3   1   3  451.05   13.90
   2  -1  -3  121.59    4.10
   2  -1  -3  121.69    4.30
   2  -1  -3  121.49    4.30
   2  -1  -3  113.99    4.20
  -2   1   3  119.89    4.30
  -2   1   3  123.89    4.10
  -2   1   3  125.59    4.20
  -2   1   3  119.69    4.40
  -2   1   3  116.69    4.20
  -2   1   3  119.99    4.40
   1  -1  -3  349.67   11.20
   1  -1  -3  358.36   11.60
   1  -1  -3  348.47   11.10
   1  -1  -3  352.26   11.30
   1  -1  -3  354.36   11.20
  -1   1   3  331.97   11.20
  -1   1   3  340.47   11.20
  -1   1   3  353.36   11.20
  -1   1   3  350.76   11.20
  -1   1   3  367.46   11.20
  -1   1   3  360.96   11.20
   0  -1  -3  522.65   16.60
   0  -1  -3  517.45   16.60
   0  -1  -3  521.55   16.60
   0  -1  -3  520.55   16.90
   0  -1  -3  520.75   16.70
   0   1   3  527.15   16.50
   0   1   3  522.05   16.50
   0   1   3  541.55   16.60
   0   1   3  528.65   16.60
   0   1   3  539.85   16.40
   0   1   3  530.15   16.50
   0   1   3  512.65   16.60
  -1  -1  -3  215.18    6.90
  -1  -1  -3  189.68    6.90
  -1  -1  -3  214.48    7.30
  -1  -1  -3  206.98    7.10
  -1  -1  -3  217.18    7.00
   1   1   3  209.68    6.90
   1   1   3  211.18    6.90
   1   1   3  215.68    6.80
   1   1   3  206.18    6.90
  -2  -1  -3   25.10    1.60
  -2  -1  -3   29.10    2.50
  -2  -1  -3   29.70    1.70
  -2  -1  -3   27.40    1.50
   2   1   3   27.50    1.80
   2   1   3   27.80    1.40
   2   1   3   29.30    1.50
   2   1   3   27.70    1.10
   2   1   3   27.20    1.50
  -3  -1  -3  173.18    6.40
  -3  -1  -3  172.28    6.90
  -3  -1  -3  167.58    6.00
  -3  -1  -3  161.38    6.00
  -3  -1  -3  175.98    6.10
   3   1   3  170.58    5.60
   3   1   3  170.48    6.20
   3   1   3  161.78    6.00
   3   1   3  165.48    6.00
  -4  -1  -3   17.20    2.80
  -4  -1  -3   15.80    2.30
  -4  -1  -3   21.40    3.40
  -4  -1  -3   23.50    2.10
   4   1   3   19.60    3.20
   4   1   3   18.30    3.40
   4   1   3   17.40    2.70
   4   1   3   21.70    2.90
   4   1   3   22.50    4.00
  -5  -1  -3   14.90    2.70
  -5  -1  -3    7.20    3.60
   5   1   3   21.90    3.90
   5   1   3   13.00    2.70
   5   1   3   12.80    3.30
   5   1   3   10.70    2.30
   5   1   3   15.00    2.10
  -6  -1  -3   22.40    6.80
  -6  -1  -3   22.00    3.10
   6   1   3   15.20    2.50
   6   1   3   20.30    3.10
   6   1   3   20.20    3.10
   6   1   3   20.10    3.80
   6   1   3   18.10    2.30
  -7  -1  -3   61.89    4.80
  -7  -1  -3   66.59    3.50
   7   1   3   77.89    4.70
   7   1   3   70.39    4.30
   7   1   3   70.49    4.50
  -8  -1  -3    4.10    1.50
   8   1   3    0.50    1.20
   8   1   3    2.40    1.50
   8   1   3    3.50    2.20
   8  -2  -3  127.59    5.60
   8  -2  -3  130.59    6.10
  -8   2   3  134.39    5.50
  -8   2   3  136.29    6.20
   7  -2  -3   -3.30    2.90
   7  -2  -3    1.80    4.10
   7  -2  -3    0.50    2.20
  -7   2   3   -2.70    4.10
  -7   2   3    1.70    2.20
  -7   2   3    7.20    2.80
  -7   2   3    3.10    2.00
   6  -2  -3    1.10    3.30
   6  -2  -3   -0.90    2.90
   6  -2  -3    2.80    3.10
   6  -2  -3   -1.00    2.40
   6  -2  -3    0.50    2.80
  -6   2   3   -0.10    2.50
  -6   2   3    0.30    2.30
  -6   2   3    0.00    1.40
   5  -2  -3  268.17   11.40
   5  -2  -3  264.57   11.20
   5  -2  -3  259.37   10.80
   5  -2  -3  259.47   10.20
  -5   2   3  269.17    9.20
  -5   2   3  265.07   10.00
  -5   2   3  270.77   10.30
  -5   2   3  259.97    9.40
   4  -2  -3   31.70    4.80
   4  -2  -3   29.70    3.10
   4  -2  -3   32.70    4.70
   4  -2  -3   41.70    4.60
   4  -2  -3   36.10    4.10
   4  -2  -3   33.00    4.70
  -4   2   3   31.60    2.40
  -4   2   3   33.50    3.10
  -4   2   3   34.20    3.10
  -4   2   3   34.30    2.80
  -4   2   3   32.90    2.50
  -4   2   3   36.00    2.30
   3  -2  -3   96.89    3.60
   3  -2  -3   95.39    3.90
  -3   2   3   96.29    4.00
  -3   2   3   96.69    4.00
  -3   2   3   91.29    3.70
  -3   2   3   95.79    4.70
  -3   2   3   97.79    3.70
  -3   2   3   94.29    3.60
   2  -2  -3  128.89    4.40
   2  -2  -3  125.89    4.50
   2  -2  -3  130.29    4.90
   2  -2  -3  124.29    4.30
   2  -2  -3  127.49    4.70
  -2   2   3  120.39    4.60
  -2   2   3  121.39    4.40
  -2   2   3  125.59    4.60
  -2   2   3  117.29    4.70
  -2   2   3  128.49    4.40
  -2   2   3  126.99    4.50
   1  -2  -3   99.19    3.80
   1  -2  -3   97.39    3.60
   1  -2  -3   99.69    4.00
   1  -2  -3  102.39    3.60
   1  -2  -3  104.99    3.60
  -1   2   3  102.69    3.70
  -1   2   3  103.29    3.70
  -1   2   3  101.99    3.30
  -1   2   3  105.09    3.70
  -1   2   3  107.29    3.70
  -1   2   3  104.69    3.50
  -1   2   3   95.89    3.70
   0  -2  -3   26.50    1.60
   0  -2  -3   25.30    1.50
   0  -2  -3   25.30    1.40
   0  -2  -3   23.80    1.30
   0  -2  -3   21.80    1.50
   0   2   3   22.50    1.60
   0   2   3   24.40    1.10
   0   2   3   21.40    1.30
   0   2   3   24.40    1.30
   0   2   3   25.40    1.40
   0   2   3   24.20    1.30
  -1  -2  -3  443.86   14.30
  -1  -2  -3  451.35   14.20
  -1  -2  -3  439.06   14.50
  -1  -2  -3  439.86   14.20
  -1  -2  -3  445.26   14.10
   1   2   3  460.05   14.20
   1   2   3  436.26   14.10
   1   2   3  432.96   14.10
   1   2   3  433.06   14.00
   1   2   3  439.86   14.20
  -2  -2  -3  545.15   17.60
  -2  -2  -3  547.05   17.00
  -2  -2  -3  529.95   16.90
  -2  -2  -3  539.65   17.10
  -2  -2  -3  498.65   16.90
   2   2   3  518.05   16.80
   2   2   3  529.85   17.00
   2   2   3  523.55   16.90
  -3  -2  -3    6.90    1.30
  -3  -2  -3    7.60    1.80
  -3  -2  -3    6.40    1.50
  -3  -2  -3   10.60    1.50
  -3  -2  -3    8.90    1.30
   3   2   3    8.50    1.30
   3   2   3   10.30    2.30
   3   2   3    7.00    1.20
   3   2   3   13.70    3.50
   3   2   3    5.70    2.20
  -4  -2  -3    7.90    2.80
  -4  -2  -3    4.10    2.20
  -4  -2  -3    2.40    1.30
  -4  -2  -3    0.30    1.60
   4   2   3    4.80    2.60
   4   2   3    3.90    1.80
   4   2   3    3.10    2.10
   4   2   3    4.00    1.90
   4   2   3    4.30    2.10
  -5  -2  -3   54.39    3.50
  -5  -2  -3   50.29    3.20
  -5  -2  -3   46.30    5.90
   5   2   3   55.29    4.30
   5   2   3   53.39    5.30
   5   2   3   52.19    3.60
   5   2   3   56.59    4.40
  -6  -2  -3   24.10    7.60
  -6  -2  -3   26.10    3.00
  -6  -2  -3   28.10    2.90
   6   2   3   23.60    3.70
   6   2   3   24.10    4.20
   6   2   3   29.40    5.20
   6   2   3   27.70    4.00
  -7  -2  -3    2.60    1.50
  -7  -2  -3    0.50    2.50
   7   2   3    1.00    1.20
   7   2   3   -1.10    2.50
   7   2   3    6.50    2.10
  -8  -2  -3   27.70    2.80
   8   2   3   25.60    2.90
   8   2   3   29.90    2.30
   8   2   3   24.10    3.10
   8  -3  -3    1.80    1.60
   8  -3  -3    0.50    1.90
  -8   3   3    3.30    2.30
  -8   3   3   -2.00    2.00
   7  -3  -3  161.58    9.40
   7  -3  -3  159.28    8.00
   7  -3  -3  156.88    7.30
   7  -3  -3  167.18    8.10
  -7   3   3  166.38    6.40
  -7   3   3  169.68    6.70
  -7   3   3  145.79    8.20
   6  -3  -3  311.77   12.60
   6  -3  -3  304.37   11.30
   6  -3  -3  309.07   12.80
   6  -3  -3  311.77   13.00
  -6   3   3  303.47   12.40
  -6   3   3  316.87   10.90
  -6   3   3  321.97   12.30
  -6   3   3  314.07   11.00
   5  -3  -3  310.57   13.00
   5  -3  -3  264.87   10.50
  -5   3   3  262.57   10.60
  -5   3   3  274.67    9.70
  -5   3   3  275.27   10.40
  -5   3   3  270.27    9.80
   4  -3  -3   63.39    4.60
   4  -3  -3   51.59    6.30
   4  -3  -3   69.09    6.30
   4  -3  -3   62.69    5.40
   4  -3  -3   53.99    5.00
   4  -3  -3   64.39    4.10
  -4   3   3   63.69    3.20
  -4   3   3   57.79    3.50
  -4   3   3   64.29    3.50
  -4   3   3   62.09    3.90
   3  -3  -3  286.87    9.90
   3  -3  -3  311.67   10.60
   3  -3  -3  285.47   10.40
   3  -3  -3  293.57   10.20
  -3   3   3  316.87   10.40
  -3   3   3  293.97   10.30
  -3   3   3  299.07   10.00
  -3   3   3  298.87   10.20
  -3   3   3  287.17   10.10
  -3   3   3  290.47    9.90
   2  -3  -3 1069.59   32.50
   2  -3  -3 1044.50   32.40
   2  -3  -3 1005.90   32.20
   2  -3  -3 1040.50   32.90
   2  -3  -3 1023.90   32.40
  -2   3   3 1037.40   32.60
  -2   3   3 1044.20   32.60
  -2   3   3 1039.70   32.50
  -2   3   3  963.10   32.50
   1  -3  -3  516.55   16.20
   1  -3  -3  518.85   16.30
   1  -3  -3  529.45   16.80
   1  -3  -3  524.05   16.60
   1  -3  -3  489.95   16.40
  -1   3   3  524.85   16.40
  -1   3   3  495.95   16.30
  -1   3   3  509.45   16.40
  -1   3   3  500.25   16.40
  -1   3   3  503.35   16.40
   0  -3  -3  496.85   15.70
   0  -3  -3  502.85   15.70
   0  -3  -3  487.25   15.80
   0  -3  -3  488.95   16.00
   0   3   3  506.25   15.70
   0   3   3  489.85   15.60
   0   3   3  491.25   15.70
   0   3   3  481.15   15.40
   0   3   3  459.25   15.60
   0   3   3  490.15   15.60
   0   3   3  482.75   15.50
  -1  -3  -3  206.88    6.90
  -1  -3  -3  188.78    6.90
  -1  -3  -3  199.88    6.80
  -1  -3  -3  194.38    7.00
   1   3   3  201.88    6.80
   1   3   3  202.48    6.90
   1   3   3  202.98    6.70
   1   3   3  196.48    6.60
   1   3   3  202.78    6.50
  -2  -3  -3  227.78    7.90
  -2  -3  -3  225.68    8.00
  -2  -3  -3  240.98    8.60
  -2  -3  -3  224.88    7.80
  -2  -3  -3  222.98    7.80
  -2  -3  -3  238.48    8.00
   2   3   3  230.98    7.80
   2   3   3  226.68    7.90
   2   3   3  231.98    7.50
   2   3   3  223.38    7.80
  -3  -3  -3  483.25   16.90
  -3  -3  -3  529.25   16.50
  -3  -3  -3  525.65   17.70
  -3  -3  -3  497.45   16.40
   3   3   3  509.35   16.80
   3   3   3  515.05   17.70
   3   3   3  504.05   17.00
   3   3   3  496.55   17.30
  -4  -3  -3   39.70    4.40
  -4  -3  -3   40.80    3.10
  -4  -3  -3   41.30    2.90
   4   3   3   42.90    3.80
   4   3   3   41.50    4.10
   4   3   3   38.20    2.80
   4   3   3   34.90    5.10
  -5  -3  -3  118.39    5.00
  -5  -3  -3  114.99    5.00
   5   3   3  108.39    7.80
   5   3   3  107.49    5.70
   5   3   3  111.49    6.00
   5   3   3  112.89    5.90
   5   3   3  116.99    5.00
   5   3   3  112.29    6.80
  -6  -3  -3   45.00    3.00
  -6  -3  -3   38.70    3.50
   6   3   3   38.10    4.00
   6   3   3   36.90    4.20
   6   3   3   54.09    5.20
   6   3   3   39.40    3.90
  -7  -3  -3   18.40    3.10
  -7  -3  -3   16.00    2.50
   7   3   3   15.00    2.70
   8  -4  -3   13.70    2.70
   8  -4  -3   19.50    3.10
  -8   4   3   12.80    2.10
  -8   4   3   15.10    2.70
   7  -4  -3   80.59    6.70
   7  -4  -3   95.29    9.10
   7  -4  -3  108.59    7.60
  -7   4   3   90.29    4.90
  -7   4   3   83.59    6.50
  -7   4   3   92.29    4.60
   6  -4  -3  173.98    8.70
   6  -4  -3  181.48    9.20
   6  -4  -3  176.08    9.00
   6  -4  -3  174.08    7.70
  -6   4   3  176.18    8.20
  -6   4   3  183.78    7.20
  -6   4   3  176.98    7.10
  -6   4   3  167.78    8.70
   5  -4  -3  133.49    6.90
   5  -4  -3  140.69    7.90
   5  -4  -3  136.59    7.60
   5  -4  -3  142.09    8.30
  -5   4   3  146.29    6.80
  -5   4   3  143.49    6.50
  -5   4   3  136.69    5.90
  -5   4   3  137.99    5.90
   4  -4  -3   79.79    5.80
   4  -4  -3   63.99    4.90
   4  -4  -3   67.29    5.80
   4  -4  -3   63.59    5.90
   4  -4  -3   65.79    4.90
  -4   4   3   69.49    4.00
  -4   4   3   68.59    3.70
  -4   4   3   71.79    3.90
  -4   4   3   68.29    3.50
  -4   4   3   65.39    4.90
   3  -4  -3  343.77   11.70
   3  -4  -3  326.37   12.50
   3  -4  -3  338.97   11.50
   3  -4  -3  345.17   12.10
   3  -4  -3  335.67   13.20
   3  -4  -3  321.77   13.40
   3  -4  -3  318.07   12.30
  -3   4   3  342.87   11.50
  -3   4   3  330.37   11.30
  -3   4   3  351.46   11.70
  -3   4   3  345.57   11.30
  -3   4   3  344.07   11.60
  -3   4   3  356.06   11.90
   2  -4  -3   36.80    2.20
   2  -4  -3   35.60    3.20
  -2   4   3   36.60    1.90
  -2   4   3   29.50    2.40
  -2   4   3   35.50    2.20
  -2   4   3   34.40    2.40
  -2   4   3   35.00    2.10
  -2   4   3   42.80    2.70
  -2   4   3   36.40    2.30
   1  -4  -3 1837.92   54.49
   1  -4  -3 1732.63   54.09
   1  -4  -3 1755.32   54.59
   1  -4  -3 1672.43   53.89
   1  -4  -3 1748.93   54.09
  -1   4   3 1695.73   54.09
  -1   4   3 1746.93   54.09
  -1   4   3 1807.52   54.19
  -1   4   3 1608.24   53.99
  -1   4   3 1714.13   53.79
  -1   4   3 1708.63   54.19
   0  -4  -3  379.16   12.80
   0  -4  -3  378.46   11.90
   0  -4  -3  383.06   12.40
   0  -4  -3  385.76   12.70
   0   4   3  390.76   12.50
   0   4   3  372.86   12.40
   0   4   3  388.46   12.20
   0   4   3  364.36   12.40
   0   4   3  372.96   12.30
   0   4   3  373.76   12.00
   0   4   3  366.76   12.30
  -1  -4  -3   11.80    1.60
  -1  -4  -3    9.60    1.40
  -1  -4  -3   11.80    1.60
  -1  -4  -3    9.20    1.40
   1   4   3   11.50    1.30
   1   4   3   10.60    0.90
   1   4   3   12.10    1.40
   1   4   3   12.50    1.70
   1   4   3   11.80    1.30
  -2  -4  -3   41.60    2.80
  -2  -4  -3   45.20    3.20
  -2  -4  -3   46.00    2.50
  -2  -4  -3   41.90    2.60
  -2  -4  -3   47.80    3.70
  -2  -4  -3   42.90    2.70
   2   4   3   44.80    3.60
   2   4   3   43.90    2.80
   2   4   3   50.19    4.00
   2   4   3   45.30    2.40
  -3  -4  -3   91.09    5.10
  -3  -4  -3   96.29    4.10
  -3  -4  -3   92.19    5.20
  -3  -4  -3   95.49    4.10
   3   4   3   90.19    5.40
   3   4   3   92.19    4.90
   3   4   3   93.59    5.00
   3   4   3   84.29    5.80
   3   4   3   90.29    4.20
   3   4   3   95.89    5.10
  -4  -4  -3  177.98    6.80
  -4  -4  -3  178.88    6.70
  -4  -4  -3  167.78    8.50
   4   4   3  172.48    7.50
   4   4   3  158.28    6.80
   4   4   3  178.78    8.20
   4   4   3  184.38    8.30
   4   4   3  173.78    7.30
   4   4   3  178.48    7.60
  -5  -4  -3   12.30    1.90
  -5  -4  -3    5.90    4.60
  -5  -4  -3    9.70    2.00
   5   4   3    8.20    2.40
   5   4   3   10.50    2.10
   5   4   3    8.80    3.70
   5   4   3    7.00    2.60
   5   4   3   10.90    3.40
   5   4   3    9.10    2.60
  -6  -4  -3   58.79    3.90
  -6  -4  -3   58.79    3.40
   6   4   3   53.49    4.70
   6   4   3   53.99    4.90
   6   4   3   64.69    4.60
  -7  -4  -3   58.69    4.00
   7   4   3   50.99    2.90
   7   4   3   51.29    3.30
   7   4   3   57.69    3.40
  -8   5   3   23.30    2.60
   7  -5  -3   20.00    3.80
   7  -5  -3   12.80    3.00
   7  -5  -3   17.40    2.80
   7  -5  -3   18.80    3.00
  -7   5   3   16.00    2.20
  -7   5   3   13.00    4.00
  -7   5   3   22.90    3.90
  -7   5   3   17.50    2.90
   6  -5  -3   21.50    4.00
   6  -5  -3   24.00    5.00
   6  -5  -3   28.10    4.50
   6  -5  -3   30.60    5.30
  -6   5   3   24.70    3.40
  -6   5   3   29.30    3.40
  -6   5   3   27.80    3.40
  -6   5   3   24.60    4.10
   5  -5  -3   37.70    5.60
   5  -5  -3   40.80    4.80
   5  -5  -3   41.30    6.30
   5  -5  -3   41.10    6.70
   5  -5  -3   38.90    5.30
  -5   5   3   40.00    4.30
  -5   5   3   43.10    2.90
  -5   5   3   38.10    3.90
  -5   5   3   43.50    3.10
   4  -5  -3   31.40    5.20
   4  -5  -3   28.60    4.20
   4  -5  -3   37.90    5.60
   4  -5  -3   35.00    4.50
   4  -5  -3   39.40    6.60
   4  -5  -3   29.50    4.60
   4  -5  -3   29.60    4.70
  -4   5   3   33.00    3.00
  -4   5   3   31.40    3.80
  -4   5   3   35.60    3.20
  -4   5   3   30.80    2.80
  -4   5   3   29.30    2.90
   3  -5  -3   45.40    4.30
   3  -5  -3   42.30    3.80
   3  -5  -3   55.59    3.80
   3  -5  -3   49.70    4.60
   3  -5  -3   36.90    6.10
   3  -5  -3   49.40    4.90
   3  -5  -3   44.10    6.20
   3  -5  -3   39.50    4.10
  -3   5   3   39.10    3.80
  -3   5   3   45.30    2.80
  -3   5   3   41.50    3.20
  -3   5   3   50.49    3.10
  -3   5   3   48.80    3.00
  -3   5   3   45.30    2.90
   2  -5  -3  810.12   27.10
   2  -5  -3  874.31   27.80
   2  -5  -3  857.51   27.20
   2  -5  -3  829.32   28.60
   2  -5  -3  837.52   28.10
   2  -5  -3  856.11   27.10
  -2   5   3  893.31   26.80
  -2   5   3  868.61   27.20
  -2   5   3  867.81   27.20
  -2   5   3  817.12   27.30
  -2   5   3  814.82   27.30
  -2   5   3  836.72   27.10
  -2   5   3  829.42   26.90
  -2   5   3  848.32   26.90
   1  -5  -3  165.28    6.50
   1  -5  -3  153.98    5.60
   1  -5  -3  154.68    6.70
   1  -5  -3  156.58    6.70
   1  -5  -3  162.78    6.00
   1  -5  -3  161.78    5.90
  -1   5   3  149.39    6.10
  -1   5   3  160.68    5.70
  -1   5   3  155.18    6.00
  -1   5   3  152.48    5.80
  -1   5   3  156.28    5.80
  -1   5   3  153.48    5.50
   0  -5  -3   76.09    3.40
   0  -5  -3   76.89    3.50
   0  -5  -3   76.39    2.70
   0  -5  -3   76.59    4.20
   0  -5  -3   78.79    3.90
   0  -5  -3   77.29    4.40
   0   5   3   77.39    3.30
   0   5   3   75.69    3.10
   0   5   3   74.99    3.40
   0   5   3   75.39    2.80
   0   5   3   76.69    3.40
  -1  -5  -3  170.18    7.20
  -1  -5  -3  169.98    6.40
  -1  -5  -3  175.18    6.30
  -1  -5  -3  171.78    6.40
  -1  -5  -3  168.28    6.80
   1   5   3  164.68    7.00
   1   5   3  171.58    6.40
   1   5   3  182.18    6.40
   1   5   3  179.38    6.40
   1   5   3  188.88    7.70
   1   5   3  164.18    6.60
  -2  -5  -3   71.79    3.60
  -2  -5  -3   71.49    3.50
  -2  -5  -3   71.69    3.80
  -2  -5  -3   71.49    4.30
  -2  -5  -3   69.79    4.00
   2   5   3   64.09    4.00
   2   5   3   74.19    4.60
   2   5   3   69.09    4.30
   2   5   3   60.99    5.50
   2   5   3   68.69    3.50
   2   5   3   66.49    4.50
  -3  -5  -3  115.39    5.00
  -3  -5  -3  121.59    4.90
  -3  -5  -3  122.89    6.50
   3   5   3  115.09    5.10
   3   5   3  118.79    5.70
   3   5   3  116.89    5.80
   3   5   3  115.59    6.10
   3   5   3  119.19    6.50
   3   5   3  100.79    5.70
  -4  -5  -3  164.58    6.40
  -4  -5  -3  161.78    6.50
  -4  -5  -3  151.78    8.70
   4   5   3  162.08    7.20
   4   5   3  162.98    7.80
   4   5   3  165.48    7.30
   4   5   3  156.38    6.40
   4   5   3  156.98    7.70
   4   5   3  156.38    6.80
  -5  -5  -3   52.29    3.60
  -5  -5  -3   48.30    3.60
  -5  -5  -3   42.70    6.60
   5   5   3   51.99    4.90
   5   5   3   50.79    4.10
   5   5   3   48.80    5.60
   5   5   3   47.70    4.60
   5   5   3   52.79    4.20
  -6  -5  -3   36.30    3.20
  -6  -5  -3   37.20    4.70
   6   5   3   32.30    3.50
   6   5   3   37.00    2.90
   6   5   3   29.90    3.80
   6   5   3   28.80    5.10
  -7  -5  -3   10.20    2.40
   7   5   3   11.60    2.10
   7   5   3   10.60    1.90
  -8   6   3   22.20    2.50
   7  -6  -3   22.70    4.10
   7  -6  -3   26.50    3.10
   7  -6  -3   31.90    4.50
   7  -6  -3   31.10    3.80
  -7   6   3   32.00    3.70
  -7   6   3   26.50    2.80
  -7   6   3   26.60    2.80
   6  -6  -3   86.79    8.40
   6  -6  -3   84.79    5.70
   6  -6  -3   86.89    6.30
   6  -6  -3   90.49    5.80
  -6   6   3   87.99    5.00
  -6   6   3   79.69    7.20
  -6   6   3   88.99    4.90
  -6   6   3   92.59    4.40
   5  -6  -3   35.30    5.20
   5  -6  -3   28.90    5.20
   5  -6  -3   35.60    6.50
   5  -6  -3   34.50    7.20
   5  -6  -3   28.80    5.40
  -5   6   3   28.90    2.60
  -5   6   3   30.10    3.90
  -5   6   3   27.90    4.10
  -5   6   3   30.00    3.50
  -5   6   3   28.60    4.20
   4  -6  -3    4.80    5.40
   4  -6  -3    2.40    3.70
   4  -6  -3    5.90    3.50
   4  -6  -3    5.80    2.70
   4  -6  -3    4.20    3.00
   4  -6  -3    5.40    3.00
   4  -6  -3    5.50    2.80
  -4   6   3    5.40    1.80
  -4   6   3    4.20    2.50
  -4   6   3    3.20    1.90
  -4   6   3    2.90    1.80
  -4   6   3    4.00    1.70
   3  -6  -3   37.60    6.10
   3  -6  -3   34.10    4.60
   3  -6  -3   38.30    6.80
   3  -6  -3   36.40    4.40
   3  -6  -3   43.30    4.10
   3  -6  -3   37.00    5.00
   3  -6  -3   29.80    5.00
  -3   6   3   36.40    5.10
  -3   6   3   40.60    2.90
  -3   6   3   44.90    3.50
  -3   6   3   42.20    3.10
  -3   6   3   41.60    2.90
  -3   6   3   38.20    3.00
   2  -6  -3  123.59    9.40
   2  -6  -3  131.59    7.20
   2  -6  -3  131.49    6.30
   2  -6  -3  139.29    6.30
   2  -6  -3  124.09    6.80
   2  -6  -3  135.59    7.00
   2  -6  -3  127.29    7.10
   2  -6  -3  138.89    7.10
  -2   6   3  143.19    5.30
  -2   6   3  130.49    5.80
  -2   6   3  121.59    6.40
  -2   6   3  135.99    5.60
  -2   6   3  139.59    5.50
  -2   6   3  139.89    5.40
  -2   6   3  134.69    5.10
   1  -6  -3  213.48    8.90
   1  -6  -3  184.78    8.70
   1  -6  -3  210.98    8.30
   1  -6  -3  205.18    7.20
   1  -6  -3  195.18    9.70
   1  -6  -3  210.58    7.60
   1  -6  -3  200.88    7.90
  -1   6   3  204.28    7.70
  -1   6   3  203.48    7.50
  -1   6   3  204.08    7.50
  -1   6   3  200.38    8.30
  -1   6   3  198.98    7.90
  -1   6   3  202.88    7.90
  -1   6   3  212.58    7.40
  -1   6   3  214.08    7.20
  -1   6   3  215.68    7.60
   0  -6  -3   20.00    3.30
   0  -6  -3   20.50    2.60
   0  -6  -3   22.90    2.90
   0  -6  -3   24.40    2.50
   0   6   3   23.70    2.70
   0   6   3   20.80    2.90
   0   6   3   23.60    2.40
   0   6   3   23.90    1.80
   0   6   3   18.50    2.30
   0   6   3   23.20    2.10
   0   6   3   20.50    1.80
  -1  -6  -3  192.58    7.30
  -1  -6  -3  197.78    7.00
  -1  -6  -3  185.08    7.30
  -1  -6  -3  185.18    8.30
  -1  -6  -3  190.08    7.90
   1   6   3  184.48    7.20
   1   6   3  168.08    8.10
   1   6   3  185.08    7.10
   1   6   3  179.98    7.70
   1   6   3  184.58    7.60
   1   6   3  185.38    7.70
   1   6   3  189.58    7.60
  -2  -6  -3  163.28    6.20
  -2  -6  -3  155.48    6.30
  -2  -6  -3  152.18    6.90
  -2  -6  -3  152.38    7.20
  -2  -6  -3  142.99    6.80
   2   6   3  157.38    6.80
   2   6   3  153.98    6.90
   2   6   3  149.59    6.70
   2   6   3  150.98    6.10
   2   6   3  156.38    7.00
  -3  -6  -3  271.77    9.70
  -3  -6  -3  274.17   11.40
   3   6   3  271.87   10.80
   3   6   3  263.67    9.50
   3   6   3  271.57   10.30
   3   6   3  260.97    9.80
   3   6   3  263.97   10.50
   3   6   3  256.97   10.10
  -4  -6  -3   36.30    3.30
  -4  -6  -3   41.30    3.50
  -4  -6  -3   35.30    6.00
  -4  -6  -3   28.10    4.10
   4   6   3   34.30    3.60
   4   6   3   30.20    4.20
   4   6   3   32.20    3.20
   4   6   3   35.20    4.80
   4   6   3   35.20    3.90
   4   6   3   39.90    4.80
  -5  -6  -3   62.79    3.60
  -5  -6  -3   61.79    4.00
   5   6   3   60.09    4.00
   5   6   3   56.49    5.90
   5   6   3   68.59    4.20
   5   6   3   64.89    5.30
  -6  -6  -3    3.70    2.20
  -6  -6  -3    1.60    2.20
   6   6   3    0.20    1.70
   6   6   3    0.60    3.40
   6   6   3    3.10    1.40
   7  -7  -3   12.50    2.20
   7  -7  -3    6.00    2.40
  -7   7   3    9.80    1.80
  -7   7   3   12.50    2.20
  -7   7   3    9.90    2.90
   6  -7  -3   80.99    7.60
  -6   7   3   84.69    5.20
  -6   7   3   68.89    5.40
  -6   7   3   87.09    4.00
   5  -7  -3    4.60    4.70
   5  -7  -3   -0.90    2.70
   5  -7  -3    4.60    3.50
   5  -7  -3    7.40    4.60
  -5   7   3    1.10    2.50
  -5   7   3    0.70    2.10
  -5   7   3    4.40    2.30
  -5   7   3   -2.20    3.00
   4  -7  -3  494.65   18.50
   4  -7  -3  487.95   17.60
   4  -7  -3  448.06   18.60
   4  -7  -3  486.75   19.20
   4  -7  -3  462.55   17.30
   4  -7  -3  476.55   18.40
  -4   7   3  493.45   16.10
  -4   7   3  479.15   16.20
  -4   7   3  482.45   16.60
  -4   7   3  475.95   16.50
   3  -7  -3  232.88   10.60
   3  -7  -3  220.48    9.90
   3  -7  -3  222.08   10.00
  -3   7   3  230.68    8.50
  -3   7   3  236.08    8.60
  -3   7   3  221.98    8.30
  -3   7   3  219.18    9.20
  -3   7   3  222.58    8.80
  -3   7   3  229.18    8.80
   2  -7  -3   14.10    4.20
   2  -7  -3   12.10    3.40
   2  -7  -3   18.20    3.70
   2  -7  -3   18.80    4.00
   2  -7  -3   16.40    3.90
   2  -7  -3   20.80    3.60
  -2   7   3   16.60    2.70
  -2   7   3   20.20    2.50
  -2   7   3   19.50    3.10
  -2   7   3   16.50    2.10
  -2   7   3   24.40    2.60
  -2   7   3   14.50    2.30
  -2   7   3   18.20    2.90
   1  -7  -3  367.56   13.00
   1  -7  -3  362.46   12.50
   1  -7  -3  360.16   14.00
   1  -7  -3  333.07   13.20
   1  -7  -3  356.86   13.20
   1  -7  -3  370.76   13.70
  -1   7   3  337.57   12.80
  -1   7   3  345.07   13.00
  -1   7   3  362.96   12.40
  -1   7   3  338.27   12.30
  -1   7   3  373.56   12.40
  -1   7   3  325.97   12.70
  -1   7   3  354.36   12.20
  -1   7   3  369.36   12.70
  -1   7   3  349.07   12.00
   0  -7  -3   50.09    5.80
   0  -7  -3   58.19    4.60
   0  -7  -3   55.39    3.60
   0  -7  -3   49.50    4.40
   0  -7  -3   54.19    5.40
   0   7   3   50.89    3.90
   0   7   3   54.79    3.40
   0   7   3   50.39    4.10
   0   7   3   53.39    3.40
   0   7   3   49.80    3.50
   0   7   3   53.89    3.10
   0   7   3   53.69    3.70
   0   7   3   50.09    4.20
  -1  -7  -3  245.28   10.20
  -1  -7  -3  254.87    9.50
  -1  -7  -3  252.37    9.20
   1   7   3  254.87    9.60
   1   7   3  241.18    9.30
   1   7   3  254.87    9.20
   1   7   3  247.68    9.30
  -2  -7  -3  128.29    7.00
  -2  -7  -3  119.99    7.00
  -2  -7  -3  130.39    6.20
   2   7   3  129.19    6.60
   2   7   3  118.49    5.90
   2   7   3  132.59    6.50
   2   7   3  132.09    5.50
   2   7   3  133.19    6.20
  -3  -7  -3  469.25   15.80
  -3  -7  -3  441.36   17.50
  -3  -7  -3  465.75   15.70
   3   7   3  453.95   15.50
   3   7   3  440.26   15.90
   3   7   3  476.05   16.50
   3   7   3  456.45   15.90
  -4  -7  -3  812.82   26.30
  -4  -7  -3  830.02   26.40
   4   7   3  778.12   25.80
   4   7   3  801.12   27.30
   4   7   3  777.22   27.00
   4   7   3  823.72   26.60
   4   7   3  812.82   26.70
  -5  -7  -3   33.60    3.10
  -5  -7  -3   30.80    3.80
   5   7   3   31.10    3.50
   5   7   3   32.70    2.40
   5   7   3   38.40    4.30
   5   7   3   40.00    5.90
  -6  -7  -3   30.90    3.90
  -6  -7  -3   30.30    4.40
   6   7   3   20.40    3.40
   6   7   3   32.20    2.60
   6   7   3   28.60    2.40
   7  -8  -3    4.10    2.30
   7  -8  -3    2.60    1.60
  -7   8   3    3.50    2.20
  -7   8   3    5.00    1.50
   6  -8  -3   26.50    3.20
   6  -8  -3   24.40    3.30
  -6   8   3   27.90    4.30
  -6   8   3   23.10    2.80
  -6   8   3   26.10    2.60
  -6   8   3   21.00    3.60
   5  -8  -3   23.40    3.50
   5  -8  -3   21.50    3.50
   5  -8  -3   20.60    5.60
  -5   8   3   22.90    3.90
  -5   8   3   18.70    3.40
  -5   8   3   26.00    2.50
  -5   8   3   26.70    4.00
   4  -8  -3   82.59    6.80
   4  -8  -3   92.79   10.10
   4  -8  -3   63.99    9.10
   4  -8  -3   69.49    6.20
  -4   8   3   78.49    5.20
  -4   8   3   71.99    4.30
  -4   8   3   70.79    4.70
  -4   8   3   73.49    4.70
  -4   8   3   72.69    5.40
   3  -8  -3   64.69    8.00
   3  -8  -3   77.59    5.90
   3  -8  -3   79.19    6.70
   3  -8  -3   73.99    6.30
  -3   8   3   76.29    4.70
  -3   8   3   76.09    5.40
  -3   8   3   79.99    4.40
  -3   8   3   82.89    6.20
  -3   8   3   69.99    4.30
   2  -8  -3   -2.10    2.90
   2  -8  -3   -5.10    3.30
   2  -8  -3    2.60    4.60
   2  -8  -3   -4.50    4.50
   2  -8  -3   -0.10    3.10
  -2   8   3    4.80    3.80
  -2   8   3   -0.70    1.80
  -2   8   3    0.70    2.20
  -2   8   3    2.10    1.50
  -2   8   3    1.30    2.60
  -2   8   3    0.80    2.10
   1  -8  -3   41.30    5.20
   1  -8  -3   28.60    4.70
   1  -8  -3   49.10    5.20
   1  -8  -3   33.90    4.00
   1  -8  -3   40.50    5.50
  -1   8   3   32.60    3.70
  -1   8   3   40.00    3.40
  -1   8   3   39.90    4.30
  -1   8   3   36.10    3.50
  -1   8   3   36.50    3.00
   0  -8  -3   25.10    3.40
   0  -8  -3   18.40    5.50
   0  -8  -3   21.80    3.80
   0  -8  -3   26.50    4.90
   0  -8  -3   24.20    4.60
   0   8   3   25.30    3.20
   0   8   3   19.00    2.60
   0   8   3   21.20    2.90
   0   8   3   21.70    3.70
   0   8   3   29.70    3.20
  -1  -8  -3   66.89    5.90
  -1  -8  -3   74.89    4.90
  -1  -8  -3   65.39    6.30
  -1  -8  -3   68.39    4.20
   1   8   3   73.49    5.10
   1   8   3   80.69    5.10
   1   8   3   73.09    4.60
   1   8   3   72.59    4.30
   1   8   3   69.69    5.00
   1   8   3   76.19    4.20
  -2  -8  -3   64.99    6.80
  -2  -8  -3   55.19    6.40
  -2  -8  -3   61.99    5.00
  -2  -8  -3   63.69    4.00
   2   8   3   59.69    5.10
   2   8   3   57.19    4.00
   2   8   3   55.79    4.80
   2   8   3   63.59    4.40
   2   8   3   53.99    4.40
  -3  -8  -3  383.76   13.00
  -3  -8  -3  333.87   15.40
   3   8   3  364.76   12.50
   3   8   3  362.66   13.10
   3   8   3  363.76   13.00
   3   8   3  367.36   13.70
  -4  -8  -3   57.49    3.90
  -4  -8  -3   60.39    4.10
   4   8   3   72.09    5.20
   4   8   3   51.09    3.90
  -5  -8  -3   11.20    2.10
  -5  -8  -3    9.60    2.40
   5   8   3    9.50    1.90
   5   8   3   12.80    1.90
  -6  -8  -3   31.60    4.10
   6   8   3   41.20    4.70
   6   8   3   34.70    2.70
   6   8   3   38.60    2.70
   6  -9  -3    3.00    1.40
   6  -9  -3    0.60    2.30
  -6   9   3    1.20    1.50
   5  -9  -3    8.80    5.00
   5  -9  -3    7.50    2.40
   5  -9  -3    2.70    2.80
  -5   9   3   11.10    2.30
  -5   9   3    6.70    1.90
  -5   9   3    7.30    2.00
  -5   9   3    8.50    2.50
   4  -9  -3   76.89    9.10
   4  -9  -3   95.49    9.80
   4  -9  -3  110.49    6.70
   4  -9  -3  100.79    7.40
  -4   9   3  115.19    6.50
  -4   9   3   91.49    6.60
  -4   9   3   99.69    6.80
  -4   9   3   98.69    4.80
  -4   9   3   93.79    5.30
   3  -9  -3   25.60    5.90
   3  -9  -3   24.80    4.30
   3  -9  -3   19.20    3.90
   3  -9  -3   10.50    3.60
   3  -9  -3   19.80    4.90
  -3   9   3   19.70    3.20
  -3   9   3   19.10    3.20
  -3   9   3   16.10    2.50
  -3   9   3   22.00    2.70
   2  -9  -3   13.50    3.80
   2  -9  -3    9.30    6.60
   2  -9  -3   12.70    4.10
  -2   9   3   12.20    2.20
  -2   9   3    7.60    2.90
  -2   9   3    9.70    3.10
  -2   9   3   11.30    2.10
  -2   9   3   12.40    2.60
  -2   9   3    7.80    2.30
   1  -9  -3  176.48    8.60
   1  -9  -3  167.98    9.70
   1  -9  -3  178.18    9.50
   1  -9  -3  176.08    8.00
   1  -9  -3  175.58    8.70
  -1   9   3  183.58    7.70
  -1   9   3  156.98    8.30
  -1   9   3  183.78    8.00
  -1   9   3  184.38    7.70
  -1   9   3  189.18    7.40
  -1   9   3  183.08    7.80
   0  -9  -3    9.10    4.70
   0  -9  -3   12.30    3.70
   0  -9  -3   10.70    6.80
   0  -9  -3   16.10    3.50
   0  -9  -3   23.70    7.60
   0   9   3   10.90    2.20
   0   9   3   15.40    2.30
   0   9   3   10.60    2.40
   0   9   3   17.70    3.00
   0   9   3    9.00    2.80
  -1  -9  -3  129.49    5.80
  -1  -9  -3  124.49    7.30
  -1  -9  -3  114.79    9.00
   1   9   3  124.89    6.60
   1   9   3  123.19    6.00
   1   9   3  126.49    6.20
   1   9   3  125.09    6.20
  -2  -9  -3   85.49    5.50
  -2  -9  -3   81.09    8.40
  -2  -9  -3   83.69    4.50
   2   9   3   76.69    4.70
   2   9   3   82.89    5.10
   2   9   3   93.69    6.10
   2   9   3   83.49    4.90
   2   9   3   81.99    4.30
   2   9   3   92.99    5.60
  -3  -9  -3  310.27   12.00
  -3  -9  -3  309.77   11.40
   3   9   3  334.47   12.10
   3   9   3  306.57   10.90
   3   9   3  298.07   11.90
   3   9   3  311.27   12.30
  -4  -9  -3   31.50    3.90
   4   9   3   37.10    3.80
   4   9   3   41.20    3.70
   4   9   3   37.20    3.20
   4   9   3   39.50    3.30
  -5  -9  -3   83.79    5.00
   5   9   3   79.59    4.10
   5   9   3   85.09    4.70
   5   9   3   86.59    4.10
   6 -10  -3    2.20    2.10
   6 -10  -3    1.60    1.30
  -6  10   3    6.10    2.00
   5 -10  -3    8.90    2.00
   5 -10  -3    5.20    2.00
  -5  10   3    2.80    1.70
  -5  10   3    5.40    1.90
   4 -10  -3    2.80    5.00
   4 -10  -3   -1.70    3.10
   4 -10  -3    3.00    3.00
  -4  10   3    0.50    2.10
  -4  10   3    5.70    3.20
  -4  10   3    1.00    2.00
  -4  10   3   -2.40    1.80
   3 -10  -3   62.29    6.30
   3 -10  -3   57.39    7.50
   3 -10  -3   60.99    6.20
  -3  10   3   47.10    4.80
  -3  10   3   50.49    3.50
  -3  10   3   56.49    4.50
  -3  10   3   54.49    3.90
   2 -10  -3   70.99    7.50
   2 -10  -3   70.29    6.70
   2 -10  -3   55.09    9.20
  -2  10   3   70.49    5.00
  -2  10   3   67.89    4.10
  -2  10   3   58.89    5.80
  -2  10   3   75.39    5.20
  -2  10   3   76.29    5.50
   1 -10  -3    9.30    4.10
   1 -10  -3    4.80    4.10
   1 -10  -3    9.60    6.30
   1 -10  -3   16.90    5.30
   1 -10  -3    9.40    3.50
  -1  10   3   10.30    3.00
  -1  10   3    3.40    2.20
  -1  10   3    3.90    2.30
  -1  10   3    6.20    2.40
   0 -10  -3  102.29    5.70
   0 -10  -3  108.09    6.00
   0 -10  -3  104.19    7.50
   0 -10  -3   97.19   10.20
   0  10   3  103.09    5.40
   0  10   3  107.19    5.10
   0  10   3  101.99    5.70
   0  10   3   94.09    6.20
   0  10   3  101.99    5.40
  -1 -10  -3  555.64   20.30
  -1 -10  -3  565.24   19.30
  -1 -10  -3  537.65   18.60
   1  10   3  547.95   18.60
   1  10   3  547.15   19.20
   1  10   3  537.05   19.20
   1  10   3  575.04   18.60
   1  10   3  515.45   18.70
  -2 -10  -3   34.40    4.40
  -2 -10  -3   31.50    7.30
  -2 -10  -3   36.30    5.10
   2  10   3   36.60    4.50
   2  10   3   37.20    4.20
   2  10   3   34.00    4.10
   2  10   3   34.20    2.90
   2  10   3   30.90    4.30
  -3 -10  -3   29.70    4.20
   3  10   3   38.10    2.70
   3  10   3   27.80    2.60
   3  10   3   28.70    4.20
   3  10   3   31.20    2.70
   3  10   3   25.20    3.40
  -4 -10  -3  129.59    6.40
  -4 -10  -3  134.99    6.40
  -4 -10  -3  139.39    6.60
   4  10   3  130.69    5.50
   4  10   3  136.09    5.50
   4  10   3  123.99    5.50
   4  10   3  138.69    6.20
   5 -11  -3   26.80    3.40
   5 -11  -3   22.90    2.60
  -5  11   3   24.30    2.30
  -5  11   3   21.40    2.20
   4 -11  -3   43.70    3.70
   4 -11  -3   43.80    3.70
   4 -11  -3   46.30    6.40
  -4  11   3   43.00    4.20
  -4  11   3   45.80    2.90
  -4  11   3   37.20    2.60
   3 -11  -3    5.40    3.20
   3 -11  -3    5.70    2.10
   3 -11  -3   -2.50    3.70
  -3  11   3    2.80    1.80
  -3  11   3   -0.20    3.20
  -3  11   3    4.00    2.30
  -3  11   3    0.40    2.50
   2 -11  -3   27.20    3.70
   2 -11  -3   24.00    4.50
  -2  11   3   21.60    3.40
  -2  11   3   20.40    3.40
   1 -11  -3    4.40    4.40
   1 -11  -3    4.40    5.30
  -1  11   3   -0.40    2.20
  -1  11   3    3.00    3.00
  -1  11   3    2.30    1.50
  -1  11   3    3.00    2.80
   0 -11  -3   15.40    3.10
   0 -11  -3   22.10    4.80
   0  11   3   29.90    4.80
   0  11   3   32.10    5.60
  -1 -11  -3   78.89    8.00
  -1 -11  -3   49.99    4.60
  -1 -11  -3   61.89    4.50
   1  11   3   69.49    4.80
   1  11   3   57.69    4.60
   1  11   3   52.79    4.10
   1  11   3   61.29    3.40
  -2 -11  -3   23.30    3.50
  -2 -11  -3   22.30    3.30
  -2 -11  -3   23.40    3.20
   2  11   3   22.90    2.50
   2  11   3   21.80    2.20
   2  11   3   20.00    3.60
   2  11   3   18.80    3.20
  -3 -11  -3    9.90    3.00
  -3 -11  -3    4.60    3.10
   3  11   3    3.00    2.10
   3  11   3    2.60    2.00
   3  11   3    1.40    1.30
   4 -12  -3   17.00    2.40
   4 -12  -3   15.40    2.70
  -4  12   3   11.60    3.20
  -4  12   3   13.30    2.10
  -4  12   3   10.40    1.70
   3 -12  -3   29.80    3.10
   3 -12  -3   34.70    6.70
   3 -12  -3   28.70    3.60
  -3  12   3   24.80    3.70
  -3  12   3   32.70    3.30
  -3  12   3   24.90    2.70
   2 -12  -3   23.20    3.20
   2 -12  -3   14.70    3.00
   2 -12  -3   13.20    3.70
  -2  12   3   16.00    2.20
  -2  12   3   18.00    2.60
   1 -12  -3   52.69    4.80
   1 -12  -3   51.59    8.40
   1 -12  -3   48.90    3.90
  -1  12   3   53.79    3.60
  -1  12   3   54.39    3.00
   0 -12  -3   52.59    8.80
   0 -12  -3   66.59    4.90
   0  12   3   63.29    3.10
   0  12   3   56.89    3.40
   0  12   3   56.39    3.20
   0  12   3   67.59    6.10
  -1 -12  -3   21.70    3.90
  -1 -12  -3   10.80    4.80
   1  12   3   25.40    3.10
   1  12   3   22.30    1.70
   1  12   3   25.10    3.60
   1  12   3   25.80    3.10
  -2 -12  -3   78.09    5.40
  -2 -12  -3   80.49    5.30
   2  12   3   79.89    4.60
   2 -13  -3   31.50    5.70
   2 -13  -3   24.30    3.60
   2 -13  -3   29.80    4.90
  -2  13   3   17.80    1.90
  -2  13   3   24.00    2.40
   1 -13  -3    3.00    2.70
   1 -13  -3    3.60    4.30
  -1  13   3    4.10    1.20
  -1  13   3    5.70    1.30
   0 -13  -3   10.20    3.90
   0 -13  -3   10.00    2.20
   0  13   3    7.50    1.50
   0  13   3    8.20    1.50
   2  14  -4    4.50    2.30
  -2 -14   4    0.50    2.70
  -2 -14   4    4.40    3.20
   1  14  -4   16.60    1.90
  -1 -14   4   14.20    3.00
  -1 -14   4   14.60    3.30
  -1 -14   4   11.10    3.40
   0  14  -4   11.50    1.80
   0  14  -4    7.20    1.50
   0 -14   4   10.90    4.40
   0 -14   4   11.00    3.30
   0 -14   4    7.50    2.80
  -1  14  -4   14.20    2.50
  -1  14  -4    7.40    1.10
   1 -14   4   13.40    5.30
   1 -14   4    5.60    3.00
  -2  14  -4   34.90    2.80
  -2  14  -4   27.30    3.70
  -2  14  -4   36.00    2.80
   2 -14   4   34.30    3.60
  -3  14  -4   28.00    2.00
  -3  14  -4   26.40    4.30
   3 -14   4   41.70    5.80
   3 -14   4   27.60    3.90
   4  13  -4    9.00    2.60
   4  13  -4   12.90    2.30
   4  13  -4   10.10    1.70
  -4 -13   4   13.20    3.30
   3  13  -4    4.20    1.20
   3  13  -4    0.40    1.60
   3  13  -4    4.30    2.10
  -3 -13   4    4.90    3.00
   2  13  -4    4.50    1.80
   2  13  -4    1.40    2.40
  -2 -13   4    3.40    2.50
  -2 -13   4    3.50    2.40
   1  13  -4    6.90    2.10
   1  13  -4    9.80    2.90
   1  13  -4    6.30    1.40
   1  13  -4    6.20    1.40
  -1 -13   4    3.90    2.80
   0  13  -4  107.69    6.10
   0  13  -4  121.49    5.60
   0  13  -4  117.99    4.80
   0 -13   4  124.29    7.80
   0 -13   4  107.59    6.10
  -1  13  -4    9.90    2.80
  -1  13  -4   13.30    2.30
  -1  13  -4   10.90    1.80
   1 -13   4    7.20    4.10
   1 -13   4   11.80    2.90
   1 -13   4    4.80    3.40
  -2  13  -4   39.70    3.00
  -2  13  -4   39.20    3.40
  -2  13  -4   33.60    3.10
   2 -13   4   32.50    5.40
  -3  13  -4   73.49    3.70
  -3  13  -4   81.69    3.90
  -3  13  -4   90.39    4.40
   3 -13   4   78.89    5.00
   3 -13   4   75.19    6.00
  -4  13  -4  206.68    7.80
  -4  13  -4  220.28    7.90
   4 -13   4  197.38    7.90
   4 -13   4  204.38    8.60
   5  12  -4    7.90    1.60
   5  12  -4    6.90    2.10
   5  12  -4   10.00    1.70
   4  12  -4   15.70    2.40
   4  12  -4    9.20    2.30
   4  12  -4   10.10    1.90
  -4 -12   4    8.60    3.00
   3  12  -4    5.60    1.70
   3  12  -4    3.60    1.80
   3  12  -4    3.30    1.20
  -3 -12   4    2.90    3.30
   2  12  -4   24.70    2.70
   2  12  -4   18.40    4.40
  -2 -12   4   24.70    3.80
  -2 -12   4   26.10    4.60
   1  12  -4   25.70    2.60
   1  12  -4   26.10    2.90
   1  12  -4   25.30    3.60
   1  12  -4   32.30    3.70
   1  12  -4   23.10    2.80
   1  12  -4   19.70    3.60
  -1 -12   4   23.50    3.40
  -1 -12   4   27.80    4.70
   0  12  -4  306.17   12.50
   0  12  -4  283.17   12.50
   0  12  -4  326.77   11.20
   0  12  -4  313.37   11.50
   0  12  -4  291.87   11.90
   0  12  -4  326.47   11.80
   0 -12   4  341.47   12.60
  -1  12  -4   66.79    5.30
  -1  12  -4   66.39    6.60
  -1  12  -4   67.09    4.60
  -1  12  -4   69.09    4.30
   1 -12   4   68.29    7.70
   1 -12   4   63.09    5.70
   1 -12   4   63.19    4.70
  -2  12  -4   10.30    2.40
  -2  12  -4   11.10    4.00
  -2  12  -4   11.00    2.60
  -2  12  -4   12.70    2.70
   2 -12   4    1.40    5.70
   2 -12   4    9.60    4.40
   2 -12   4   15.50    5.00
  -3  12  -4   12.60    2.20
  -3  12  -4   18.10    3.20
   3 -12   4   13.20    2.90
   3 -12   4    9.30    3.50
  -4  12  -4   11.00    2.00
  -4  12  -4    9.90    2.30
   4 -12   4    4.80    2.90
   4 -12   4    5.70    2.90
  -5  12  -4   21.10    2.80
  -5  12  -4   24.70    2.30
   5 -12   4   25.20    2.50
   5 -12   4   25.20    2.80
   5  11  -4    0.30    0.90
   5  11  -4   -0.20    1.20
   5  11  -4    1.40    2.00
  -5 -11   4    4.80    4.30
   4  11  -4   49.99    3.90
   4  11  -4   61.79    3.60
   4  11  -4   66.49    4.80
   3  11  -4    1.00    1.90
   3  11  -4    4.00    2.10
   3  11  -4    3.30    3.10
   3  11  -4    3.40    2.00
   3  11  -4    3.60    2.70
  -3 -11   4    5.40    3.50
  -3 -11   4    3.30    2.10
   2  11  -4   99.09    5.10
   2  11  -4   77.59    4.20
   2  11  -4   79.49    6.10
   2  11  -4   86.29    5.00
   2  11  -4   84.79    4.60
   2  11  -4   85.09    5.30
  -2 -11   4   90.69    8.90
  -2 -11   4   87.19    5.70
  -2 -11   4   94.19    4.90
   1  11  -4    7.60    3.20
   1  11  -4   10.20    1.90
   1  11  -4   11.90    2.60
   1  11  -4    7.40    3.00
   1  11  -4    5.40    2.10
   1  11  -4    6.20    2.40
  -1 -11   4   17.00    4.90
  -1 -11   4    7.90    2.30
  -1 -11   4   12.20    4.50
   0  11  -4   23.30    3.00
   0  11  -4   24.90    4.20
   0  11  -4   25.40    4.90
   0  11  -4   21.60    3.60
   0  11  -4   21.70    3.40
   0  11  -4   20.20    3.50
   0  11  -4   21.70    3.00
   0 -11   4   12.90    4.40
   0 -11   4   16.70    4.00
   0 -11   4   21.60    3.10
  -1  11  -4    4.50    2.10
  -1  11  -4    3.50    1.80
  -1  11  -4    0.40    2.50
  -1  11  -4   -1.30    2.60
  -1  11  -4    5.00    3.00
   1 -11   4    4.50    3.50
   1 -11   4    0.20    2.40
   1 -11   4    3.10    4.40
   1 -11   4   -4.60    4.30
  -2  11  -4   88.39    4.70
  -2  11  -4   91.99    5.50
  -2  11  -4   86.89    5.10
  -2  11  -4   90.99    6.20
   2 -11   4   70.49    6.90
   2 -11   4   89.39    8.10
   2 -11   4   82.29    7.90
   2 -11   4   94.79    8.30
  -3  11  -4  187.58    7.70
  -3  11  -4  197.98    8.40
  -3  11  -4  204.08    8.50
  -3  11  -4  179.98    9.80
   3 -11   4  203.08    9.80
   3 -11   4  210.38   10.60
  -4  11  -4   39.60    3.80
  -4  11  -4   33.40    4.00
  -4  11  -4   28.00    4.10
   4 -11   4   38.20    5.30
   4 -11   4   31.50    4.10
   4 -11   4   28.20    4.50
  -5  11  -4   12.60    2.40
  -5  11  -4   15.50    2.70
  -5  11  -4   10.10    2.90
   5 -11   4   13.50    2.60
   5 -11   4   12.40    2.10
   6 -11   4    8.30    1.80
   6  10  -4  111.49    4.80
   6  10  -4  105.09    4.80
   6  10  -4  112.69    4.70
   5  10  -4  193.68    7.50
   5  10  -4  189.28    7.00
   5  10  -4  191.08    7.20
  -5 -10   4  166.18    7.80
   4  10  -4   29.90    3.40
   4  10  -4   22.40    3.50
   4  10  -4   24.00    3.80
   4  10  -4   30.60    5.50
  -4 -10   4   25.30    3.40
  -4 -10   4   20.50    4.20
   3  10  -4   49.99    3.90
   3  10  -4   56.19    4.90
   3  10  -4   55.19    5.30
   3  10  -4   59.19    4.90
   3  10  -4   53.39    4.50
  -3 -10   4   45.60    7.90
  -3 -10   4   47.80    3.60
   2  10  -4   82.89    4.40
   2  10  -4   89.79    5.00
   2  10  -4   95.79    5.50
   2  10  -4   79.99    5.40
   2  10  -4   91.69    6.00
   2  10  -4   91.49    4.80
   2  10  -4   86.49    6.20
  -2 -10   4   81.99    6.90
  -2 -10   4   89.79    6.60
  -2 -10   4   89.19    4.50
   1  10  -4  116.49    6.80
   1  10  -4  127.19    5.90
   1  10  -4  119.69    6.00
   1  10  -4  116.99    5.70
   1  10  -4  122.09    5.50
   1  10  -4  124.09    6.20
  -1 -10   4  122.69    5.70
  -1 -10   4  120.69    7.30
  -1 -10   4  123.39    7.50
   0  10  -4   72.59    6.30
   0  10  -4   66.09    6.60
   0  10  -4   79.59    4.90
   0  10  -4   82.49    5.10
   0  10  -4   79.49    5.20
   0  10  -4   85.09    5.00
   0  10  -4   74.69    4.20
   0 -10   4   89.89    6.10
   0 -10   4   89.29    4.50
   0 -10   4   85.19    6.40
  -1  10  -4   15.00    2.70
  -1  10  -4   19.10    3.60
  -1  10  -4   16.80    2.60
  -1  10  -4   25.80    3.80
   1 -10   4   15.10    3.60
   1 -10   4   23.80    4.30
  -2  10  -4    9.70    2.50
  -2  10  -4   12.20    2.60
  -2  10  -4   12.00    3.10
  -2  10  -4   10.10    2.00
   2 -10   4    4.70    4.20
   2 -10   4    8.10    4.70
   2 -10   4   13.20    3.30
   2 -10   4    8.50    4.10
   2 -10   4    9.50    3.40
   2 -10   4   10.70    3.90
  -3  10  -4  222.88    9.10
  -3  10  -4  213.58    9.70
  -3  10  -4  225.98    9.10
  -3  10  -4  219.48    8.90
   3 -10   4  218.68   10.40
   3 -10   4  196.48   11.50
   3 -10   4  224.58   11.30
   3 -10   4  216.68   10.80
  -4  10  -4   80.89    5.20
  -4  10  -4   64.49    5.90
  -4  10  -4   70.09    6.20
  -4  10  -4   69.89    5.30
   4 -10   4   63.89    6.20
   4 -10   4   75.79    6.00
   4 -10   4   76.39    7.30
  -5  10  -4   38.70    4.90
  -5  10  -4   23.10    3.50
  -5  10  -4   29.20    3.50
   5 -10   4   19.00    3.40
   5 -10   4   27.50    3.40
   5 -10   4   33.60    3.90
  -6  10  -4   -1.50    2.00
  -6  10  -4   -0.20    2.00
   6 -10   4   -0.30    1.40
   6 -10   4    1.20    1.90
   6   9  -4   30.30    2.70
   6   9  -4   36.60    3.80
   6   9  -4   31.10    2.80
   5   9  -4   70.29    4.60
   5   9  -4   56.59    4.70
  -5  -9   4   85.19    4.80
   4   9  -4    1.30    1.70
   4   9  -4    0.90    2.20
   4   9  -4    2.40    3.00
   4   9  -4    1.50    2.00
  -4  -9   4    1.00    2.20
   3   9  -4  176.98    8.10
   3   9  -4  193.08    7.80
   3   9  -4  183.88    8.10
   3   9  -4  191.28    7.60
   3   9  -4  184.58    8.70
  -3  -9   4  172.88    8.90
  -3  -9   4  181.78    8.60
  -3  -9   4  187.88    7.10
   2   9  -4   46.50    3.60
   2   9  -4   46.80    3.90
   2   9  -4   46.90    4.80
   2   9  -4   50.39    3.40
   2   9  -4   48.80    3.90
   2   9  -4   50.49    4.10
  -2  -9   4   46.00    5.40
  -2  -9   4   42.30    5.70
  -2  -9   4   46.80    4.00
   1   9  -4   52.09    3.30
   1   9  -4   53.79    4.50
   1   9  -4   46.90    3.50
   1   9  -4   39.20    6.60
  -1  -9   4   45.80    5.00
  -1  -9   4   48.00    3.50
  -1  -9   4   43.70    4.50
   0   9  -4  174.48    7.10
   0   9  -4  169.08    7.10
   0   9  -4  172.98    8.10
   0   9  -4  160.28    7.60
   0  -9   4  181.28    7.90
   0  -9   4  169.08    7.90
   0  -9   4  183.98    7.00
  -1   9  -4    8.50    2.30
  -1   9  -4   10.60    2.30
  -1   9  -4    5.60    2.10
  -1   9  -4    8.30    2.10
   1  -9   4    7.10    1.90
   1  -9   4    9.30    3.20
   1  -9   4    8.90    2.50
  -2   9  -4    9.00    2.30
  -2   9  -4    8.50    2.50
  -2   9  -4    6.30    4.60
  -2   9  -4   10.80    2.30
  -2   9  -4   14.30    2.50
  -2   9  -4    4.60    2.60
   2  -9   4   10.80    2.70
   2  -9   4   -1.00    5.20
   2  -9   4   10.00    4.80
   2  -9   4   10.80    4.70
   2  -9   4    6.40    3.00
   2  -9   4    9.90    2.90
  -3   9  -4   14.70    2.70
  -3   9  -4   13.70    2.80
  -3   9  -4   17.30    2.50
  -3   9  -4   11.80    2.80
  -3   9  -4   13.80    3.30
   3  -9   4   21.20    4.90
   3  -9   4   18.30    4.00
   3  -9   4   12.00    4.10
   3  -9   4   25.90    5.00
   3  -9   4   14.40    4.30
  -4   9  -4  530.15   18.00
  -4   9  -4  536.05   17.90
  -4   9  -4  475.75   18.10
  -4   9  -4  498.55   17.70
   4  -9   4  469.05   18.40
   4  -9   4  525.05   18.50
   4  -9   4  542.95   19.90
   4  -9   4  486.95   19.80
  -5   9  -4    8.50    2.70
  -5   9  -4    8.50    2.90
  -5   9  -4   11.90    3.70
  -5   9  -4    6.80    2.50
   5  -9   4    4.10    3.50
   5  -9   4    6.40    2.80
  -6   9  -4   10.30    2.20
  -6   9  -4    9.30    3.90
   6  -9   4    6.90    2.20
   7   8  -4  122.29    5.10
   7   8  -4  123.89    5.00
   6   8  -4   17.90    2.10
   6   8  -4   14.90    2.40
   6   8  -4   13.70    2.30
   5   8  -4   31.70    3.20
   5   8  -4   43.40    3.90
   5   8  -4   24.30    4.50
  -5  -8   4   34.90    3.80
  -5  -8   4   30.80    6.90
   4   8  -4   12.20    2.80
   4   8  -4   13.10    3.10
   4   8  -4    7.30    2.30
   4   8  -4   15.30    2.70
  -4  -8   4    9.80    2.10
   3   8  -4   15.20    2.50
   3   8  -4   12.40    2.00
   3   8  -4   12.40    2.90
   3   8  -4   12.30    2.30
  -3  -8   4    7.00    3.30
  -3  -8   4   12.40    2.00
  -3  -8   4    8.80    2.90
   2   8  -4   21.50    3.10
   2   8  -4   15.80    2.90
   2   8  -4   24.20    3.40
   2   8  -4   25.30    2.60
   2   8  -4   25.40    2.80
   2   8  -4   22.30    2.60
  -2  -8   4   25.50    3.60
  -2  -8   4   22.90    4.00
  -2  -8   4   19.00    2.30
  -2  -8   4   21.10    2.40
   1   8  -4  186.78    8.30
   1   8  -4  196.68    7.80
   1   8  -4  179.98    9.30
   1   8  -4  200.78    7.50
   1   8  -4  194.58    7.50
   1   8  -4  191.28    7.10
   1   8  -4  193.88    7.50
  -1  -8   4  190.88    8.20
  -1  -8   4  198.88    7.10
  -1  -8   4  193.78    8.00
  -1  -8   4  179.18    7.10
   0   8  -4  292.17   10.10
   0   8  -4  284.27   10.40
   0   8  -4  278.17   11.50
   0   8  -4  306.87   10.70
   0   8  -4  310.77   10.90
   0   8  -4  297.97   10.70
   0   8  -4  311.47   10.80
   0   8  -4  288.67   11.10
   0   8  -4  294.37   10.50
   0  -8   4  297.17   11.10
   0  -8   4  316.27   10.50
   0  -8   4  293.97   10.80
   0  -8   4  309.97   11.20
  -1   8  -4   20.20    3.00
  -1   8  -4   17.70    2.50
  -1   8  -4   15.80    3.70
  -1   8  -4   19.10    2.80
  -1   8  -4   22.10    2.30
  -1   8  -4   18.50    3.00
  -1   8  -4   18.80    2.30
  -1   8  -4   17.90    3.10
   1  -8   4   22.10    3.00
   1  -8   4   22.10    2.60
   1  -8   4   17.90    3.10
  -2   8  -4    6.80    2.20
  -2   8  -4    7.90    2.10
  -2   8  -4    3.70    1.80
  -2   8  -4    9.50    3.10
  -2   8  -4    5.80    1.70
  -2   8  -4    5.10    2.20
   2  -8   4    5.60    2.10
   2  -8   4    0.40    5.00
   2  -8   4    3.70    4.60
   2  -8   4    6.10    2.20
   2  -8   4    2.80    3.60
   2  -8   4    0.80    2.70
  -3   8  -4   -0.80    2.40
  -3   8  -4    5.90    3.20
  -3   8  -4    2.70    2.10
  -3   8  -4    2.80    2.20
  -3   8  -4    2.80    1.90
  -3   8  -4    4.10    1.80
   3  -8   4    6.80    3.40
   3  -8   4    6.70    3.00
   3  -8   4    1.20    4.20
   3  -8   4   -2.10    3.40
  -4   8  -4   17.60    3.20
  -4   8  -4   24.20    3.90
  -4   8  -4   19.30    3.20
  -4   8  -4   17.30    3.00
  -4   8  -4   20.80    3.10
   4  -8   4   15.00    3.60
   4  -8   4   12.10    6.10
   4  -8   4   16.60    3.40
   4  -8   4   14.70    4.20
  -5   8  -4   50.99    7.50
  -5   8  -4   50.19    4.70
  -5   8  -4   58.99    4.90
  -5   8  -4   53.29    6.00
  -5   8  -4   51.19    3.30
   5  -8   4   55.79    6.40
   5  -8   4   64.99    5.20
   5  -8   4   63.29    5.80
  -6   8  -4    1.20    2.30
  -6   8  -4    2.00    1.70
  -6   8  -4    4.20    3.60
   6  -8   4    2.20    2.40
   6  -8   4    4.10    1.90
  -7   8  -4   31.00    3.80
  -7   8  -4   34.00    2.80
   7  -8   4   40.40    2.50
   7  -8   4   36.80    3.20
   7  -8   4   35.50    3.50
   7   7  -4   13.50    2.20
   7   7  -4   14.10    2.30
   6   7  -4  227.68    9.70
   5   7  -4   97.59    6.20
   5   7  -4   97.09    5.10
   5   7  -4   86.49    4.70
  -5  -7   4   68.19    7.70
  -5  -7   4   86.59    5.60
   4   7  -4   15.30    3.20
   4   7  -4   17.20    3.00
   4   7  -4   19.00    2.70
   4   7  -4   19.00    2.70
  -4  -7   4   17.60    4.00
  -4  -7   4   20.90    2.70
   3   7  -4   95.99    5.80
   3   7  -4   94.99    5.60
   3   7  -4   90.39    6.30
   3   7  -4   90.89    4.60
   3   7  -4   94.99    4.70
   3   7  -4   96.29    4.70
  -3  -7   4   88.89    4.10
  -3  -7   4   97.89    5.20
   2   7  -4  212.88    8.10
   2   7  -4  208.68    8.20
   2   7  -4  203.28    8.00
   2   7  -4  214.48    8.10
   2   7  -4  230.28    8.20
   2   7  -4  218.48    8.80
  -2  -7   4  213.58    7.40
  -2  -7   4  208.58    8.60
  -2  -7   4  225.98    8.60
  -2  -7   4  226.18    7.70
   1   7  -4  503.95   16.20
   1   7  -4  456.55   16.00
   1   7  -4  484.05   16.30
   1   7  -4  473.15   16.20
   1   7  -4  491.75   16.20
   1   7  -4  470.05   16.10
   1   7  -4  473.95   15.60
  -1  -7   4  498.05   16.50
  -1  -7   4  496.05   15.80
  -1  -7   4  458.25   16.40
  -1  -7   4  492.35   16.40
  -1  -7   4  491.35   15.80
   0   7  -4  192.38    7.00
   0   7  -4  179.08    7.00
   0   7  -4  198.48    7.90
   0   7  -4  177.58    7.10
   0   7  -4  184.38    6.40
   0   7  -4  192.68    7.10
   0   7  -4  195.68    6.50
   0   7  -4  188.58    7.50
   0   7  -4  174.08    7.00
   0  -7   4  189.08    6.80
   0  -7   4  184.78    6.80
   0  -7   4  185.38    7.30
   0  -7   4  179.58    8.10
   0  -7   4  193.38    6.80
   0  -7   4  169.08    7.80
  -1   7  -4   57.89    4.00
  -1   7  -4   67.29    4.40
  -1   7  -4   57.89    3.70
  -1   7  -4   64.99    2.90
  -1   7  -4   60.19    3.50
  -1   7  -4   66.19    3.00
  -1   7  -4   60.09    3.10
  -1   7  -4   57.99    4.00
   1  -7   4   61.99    3.20
   1  -7   4   58.09    3.40
   1  -7   4   60.99    3.50
   1  -7   4   55.89    3.20
   1  -7   4   63.09    4.60
   1  -7   4   48.50    6.40
  -2   7  -4   19.00    2.60
  -2   7  -4   15.10    2.80
  -2   7  -4   16.10    2.00
  -2   7  -4   20.10    3.20
  -2   7  -4   23.40    3.90
  -2   7  -4   18.60    2.50
  -2   7  -4   23.50    2.60
  -2   7  -4   18.70    2.80
  -2   7  -4   19.50    3.10
   2  -7   4   15.20    2.70
   2  -7   4   15.00    2.60
   2  -7   4   17.80    2.80
   2  -7   4   15.50    2.30
   2  -7   4   22.70    4.20
   2  -7   4   16.10    2.30
   2  -7   4    8.60    6.00
   2  -7   4   17.50    3.70
  -3   7  -4   29.10    2.60
  -3   7  -4   34.80    4.10
  -3   7  -4   29.70    3.60
  -3   7  -4   27.20    3.20
  -3   7  -4   30.30    3.50
  -3   7  -4   22.10    3.40
  -3   7  -4   30.90    4.30
   3  -7   4   31.20    4.90
   3  -7   4   20.50    3.60
   3  -7   4   30.00    5.10
   3  -7   4   27.40    3.60
  -4   7  -4   -0.30    2.20
  -4   7  -4    1.80    1.60
  -4   7  -4    3.10    2.50
  -4   7  -4    4.90    3.10
  -4   7  -4    3.10    2.50
   4  -7   4   -4.90    5.30
   4  -7   4    2.10    3.40
   4  -7   4    0.20    2.70
  -5   7  -4    7.10    3.10
  -5   7  -4    5.90    4.00
  -5   7  -4   11.70    2.70
  -5   7  -4   15.10    3.10
   5  -7   4   15.70    3.80
   5  -7   4   13.50    3.00
   5  -7   4   18.40    3.80
  -6   7  -4   -0.90    3.20
  -6   7  -4    2.90    2.80
  -6   7  -4    1.80    1.40
  -6   7  -4   -0.90    4.10
  -7   7  -4    2.90    2.50
  -7   7  -4    3.40    1.20
   7  -7   4    1.10    1.70
   7  -7   4    6.30    1.40
   7  -7   4    5.70    2.00
   8   6  -4   13.70    2.20
   7   6  -4    3.10    1.40
   7   6  -4    5.70    2.10
   7   6  -4    2.30    3.10
   6   6  -4   15.40    2.60
   6   6  -4   12.50    3.70
   6   6  -4   10.40    2.10
   6   6  -4   11.40    3.40
   5   6  -4    8.30    3.00
   5   6  -4    9.00    2.00
   5   6  -4   11.00    2.40
   5   6  -4   10.70    4.80
  -5  -6   4   12.20    4.60
   4   6  -4  438.66   15.10
   4   6  -4  454.65   17.10
  -4  -6   4  403.06   14.80
   3   6  -4  418.16   14.30
   3   6  -4  419.16   14.30
   3   6  -4  411.46   14.50
   3   6  -4  401.56   15.20
   3   6  -4  437.76   14.40
   3   6  -4  422.16   14.90
  -3  -6   4  420.46   13.50
   2   6  -4   20.30    2.00
   2   6  -4   22.10    2.40
   2   6  -4   22.10    3.70
   2   6  -4   20.80    1.30
   2   6  -4   19.30    1.20
   2   6  -4   18.10    2.70
  -2  -6   4   18.40    1.90
  -2  -6   4   20.70    1.90
  -2  -6   4   19.40    2.30
   1   6  -4 1606.74   48.60
   1   6  -4 1536.25   48.40
   1   6  -4 1543.35   48.10
   1   6  -4 1514.65   48.00
  -1  -6   4 1550.14   47.90
  -1  -6   4 1495.45   48.60
  -1  -6   4 1590.74   48.40
  -1  -6   4 1525.75   48.00
  -1  -6   4 1537.05   47.70
  -1  -6   4 1454.75   48.50
  -1  -6   4 1535.85   48.00
   0   6  -4   95.59    4.00
   0   6  -4  101.99    4.30
   0   6  -4  102.89    3.60
   0   6  -4  101.19    3.70
   0   6  -4   95.79    4.40
   0   6  -4   98.09    4.30
   0  -6   4  101.39    4.50
   0  -6   4  104.09    4.70
   0  -6   4  102.09    4.00
   0  -6   4   98.39    3.70
   0  -6   4   97.19    3.90
   0  -6   4  101.39    5.40
   0  -6   4  103.59    4.10
  -1   6  -4   14.60    2.20
  -1   6  -4   17.40    1.60
  -1   6  -4   17.00    1.60
  -1   6  -4   17.70    1.60
   1  -6   4   18.40    2.40
   1  -6   4   17.80    1.40
   1  -6   4   19.80    3.50
   1  -6   4   15.70    2.10
   1  -6   4   15.60    1.70
   1  -6   4   17.90    2.80
  -2   6  -4   88.39    4.10
  -2   6  -4   89.29    4.90
  -2   6  -4   89.09    4.70
  -2   6  -4   90.09    3.70
  -2   6  -4   87.69    4.10
  -2   6  -4   90.69    5.00
  -2   6  -4   85.89    3.80
   2  -6   4   88.39    4.20
   2  -6   4   93.29    5.20
   2  -6   4   95.29    4.20
   2  -6   4   94.09    4.50
   2  -6   4   95.59    4.40
   2  -6   4   86.19    7.80
  -3   6  -4   52.09    5.30
  -3   6  -4   43.10    2.90
  -3   6  -4   47.90    3.10
  -3   6  -4   41.60    2.80
  -3   6  -4   39.60    4.60
  -3   6  -4   45.00    3.20
  -3   6  -4   39.00    3.80
   3  -6   4   43.40    5.70
   3  -6   4   40.90    3.20
   3  -6   4   39.80    5.30
   3  -6   4   34.80    4.00
   3  -6   4   39.90    3.80
   3  -6   4   43.80    4.80
   3  -6   4   35.10    4.70
  -4   6  -4  622.04   22.00
  -4   6  -4  650.03   21.20
  -4   6  -4  631.04   21.70
  -4   6  -4  657.23   21.00
  -4   6  -4  628.04   21.70
  -4   6  -4  640.24   21.90
   4  -6   4  642.24   23.30
   4  -6   4  634.74   23.00
   4  -6   4  715.03   23.70
   4  -6   4  643.94   22.10
  -5   6  -4    1.50    1.80
  -5   6  -4    4.60    2.00
  -5   6  -4    2.50    2.70
  -5   6  -4    3.20    2.80
  -5   6  -4    2.70    3.40
   5  -6   4    2.20    2.50
   5  -6   4    0.30    3.20
   5  -6   4    3.00    3.40
  -6   6  -4   25.80    2.40
  -6   6  -4   26.30    4.10
  -6   6  -4   24.00    4.20
   6  -6   4   34.70    5.00
   6  -6   4   23.30    3.50
  -7   6  -4   38.00    4.60
  -7   6  -4   40.10    2.80
   7  -6   4   38.00    2.60
   7  -6   4   41.00    3.60
   7  -6   4   42.80    3.70
   8   5  -4    6.00    1.90
   8   5  -4    2.40    1.40
   7   5  -4  127.89    5.50
   7   5  -4  123.09    6.00
   7   5  -4  125.99    6.70
   6   5  -4    7.80    3.40
   6   5  -4    9.00    2.00
   6   5  -4    3.10    4.50
   6   5  -4   12.30    2.50
   5   5  -4    3.60    1.70
   5   5  -4    3.30    2.90
   5   5  -4    4.90    2.10
   5   5  -4   -3.10    3.50
  -5  -5   4    5.90    3.00
   4   5  -4   24.40    5.10
   4   5  -4   16.20    2.90
   4   5  -4   18.30    3.20
   4   5  -4   16.00    2.20
   4   5  -4   14.40    2.40
   4   5  -4    9.90    3.60
  -4  -5   4   12.80    2.40
   3   5  -4  299.87   11.00
   3   5  -4  324.57   11.00
   3   5  -4  331.47   11.20
   3   5  -4  298.07   11.00
   3   5  -4  316.27   11.70
  -3  -5   4  327.07   11.10
  -3  -5   4  303.57   11.10
  -3  -5   4  318.47   10.10
   2   5  -4  116.19    4.50
   2   5  -4  124.59    5.00
   2   5  -4  112.89    3.70
  -2  -5   4  116.89    3.90
  -2  -5   4  120.69    4.10
  -2  -5   4  115.49    4.10
  -2  -5   4  108.19    4.10
  -2  -5   4  118.79    3.90
   1   5  -4  179.68    6.10
   1   5  -4  176.78    6.50
   1   5  -4  182.78    6.30
  -1  -5   4  179.08    6.20
  -1  -5   4  185.48    6.00
  -1  -5   4  187.48    6.20
  -1  -5   4  184.68    6.40
  -1  -5   4  187.68    6.20
   0   5  -4  709.93   22.90
   0   5  -4  694.23   22.70
   0   5  -4  697.03   22.50
   0   5  -4  711.03   22.50
   0   5  -4  728.03   23.10
   0  -5   4  712.03   22.70
   0  -5   4  696.23   23.30
   0  -5   4  740.93   22.70
   0  -5   4  701.63   22.60
   0  -5   4  750.72   23.10
   0  -5   4  742.73   23.20
  -1   5  -4  187.18    6.70
  -1   5  -4  187.68    6.50
  -1   5  -4  179.78    6.90
  -1   5  -4  172.48    6.60
  -1   5  -4  186.28    6.50
  -1   5  -4  190.88    6.90
   1  -5   4  194.58    6.90
   1  -5   4  187.78    6.50
   1  -5   4  191.48    6.60
   1  -5   4  203.38    7.20
   1  -5   4  194.18    6.70
  -2   5  -4  403.86   14.10
  -2   5  -4  395.36   13.20
  -2   5  -4  390.76   12.90
  -2   5  -4  404.76   13.20
  -2   5  -4  393.06   13.20
  -2   5  -4  383.06   13.20
  -2   5  -4  380.06   13.00
  -2   5  -4  395.66   13.70
   2  -5   4  400.66   13.30
   2  -5   4  397.86   13.20
   2  -5   4  400.96   13.20
   2  -5   4  392.96   14.00
   2  -5   4  403.56   13.10
   2  -5   4  394.76   14.00
  -3   5  -4  576.04   19.00
  -3   5  -4  543.15   19.20
  -3   5  -4  594.54   18.60
  -3   5  -4  581.04   18.40
  -3   5  -4  565.84   19.50
  -3   5  -4  583.54   19.90
   3  -5   4  603.54   19.20
   3  -5   4  563.24   19.60
   3  -5   4  564.94   18.90
   3  -5   4  553.94   20.40
   3  -5   4  539.05   20.30
   3  -5   4  580.34   18.80
  -4   5  -4   63.29    3.30
  -4   5  -4   65.59    6.20
  -4   5  -4   60.69    4.20
  -4   5  -4   59.39    5.50
  -4   5  -4   62.89    3.50
   4  -5   4   47.70    4.90
   4  -5   4   62.99    7.60
   4  -5   4   64.19    5.60
  -5   5  -4   69.29    3.60
  -5   5  -4   71.09    5.10
  -5   5  -4   71.19    4.10
  -5   5  -4   59.59    5.70
   5  -5   4   62.89    5.80
   5  -5   4   60.59    7.10
   5  -5   4   63.39    4.70
   5  -5   4   69.09    7.90
   5  -5   4   67.09    6.10
  -6   5  -4    4.20    5.00
  -6   5  -4    5.20    1.80
  -6   5  -4    5.40    1.80
  -6   5  -4    8.60    4.60
   6  -5   4    4.60    3.20
   6  -5   4    2.80    3.70
   6  -5   4    5.40    2.20
  -7   5  -4    5.00    2.70
  -7   5  -4    3.30    1.50
   7  -5   4    5.10    1.50
   7  -5   4    3.10    1.50
   7  -5   4   -0.60    3.20
   7  -5   4    4.40    1.50
   8   4  -4   26.40    2.60
   8   4  -4   26.80    3.80
   7   4  -4  124.99    7.70
   7   4  -4   96.99    5.80
   6   4  -4  233.98   10.40
   6   4  -4  262.27    9.60
   6   4  -4  253.37   10.20
   5   4  -4  142.19    9.20
   5   4  -4  128.79    5.80
   5   4  -4  126.49    7.80
   5   4  -4  142.79    7.90
  -5  -4   4  115.79    6.40
   4   4  -4  271.07   10.00
   4   4  -4  258.87   10.90
   4   4  -4  275.67   11.10
   4   4  -4  298.77   10.00
   4   4  -4  270.37   10.20
   4   4  -4  290.47   11.10
  -4  -4   4  288.77   10.10
   3   4  -4  162.48    6.00
   3   4  -4  166.18    6.20
  -3  -4   4  153.78    5.40
  -3  -4   4  164.88    6.20
   2   4  -4 1243.98   38.30
   2   4  -4 1228.68   38.60
  -2  -4   4 1270.97   38.30
  -2  -4   4 1137.39   37.80
  -2  -4   4 1195.28   37.70
   1   4  -4  466.45   14.70
   1   4  -4  448.16   14.30
   1   4  -4  475.55   15.00
  -1  -4   4  435.56   14.40
  -1  -4   4  451.75   14.30
  -1  -4   4  470.35   14.50
  -1  -4   4  429.06   14.60
  -1  -4   4  467.55   14.40
  -1  -4   4  440.56   14.20
   0   4  -4   99.49    4.00
   0   4  -4   92.59    3.70
   0   4  -4   95.89    3.30
   0   4  -4   98.09    3.30
   0   4  -4   97.79    3.50
   0  -4   4  103.49    3.60
   0  -4   4   92.59    3.60
   0  -4   4   97.09    3.80
   0  -4   4   99.39    3.50
   0  -4   4   98.39    3.60
  -1   4  -4   97.09    4.60
  -1   4  -4   94.29    3.60
  -1   4  -4   89.49    3.80
  -1   4  -4   98.89    4.10
  -1   4  -4   95.99    3.60
  -1   4  -4   99.89    4.00
  -1   4  -4   91.59    3.80
   1  -4   4  100.39    3.60
   1  -4   4  101.89    4.10
   1  -4   4   92.49    3.80
   1  -4   4   98.79    3.70
   1  -4   4   96.19    3.80
  -2   4  -4  703.43   23.40
  -2   4  -4  742.83   23.70
  -2   4  -4  755.62   24.60
  -2   4  -4  755.72   24.10
  -2   4  -4  736.13   23.80
   2  -4   4  747.43   23.70
   2  -4   4  749.92   23.70
   2  -4   4  752.62   24.10
   2  -4   4  745.53   23.90
   2  -4   4  742.83   23.70
   2  -4   4  708.43   23.60
  -3   4  -4 1479.75   46.90
  -3   4  -4 1493.45   47.50
  -3   4  -4 1454.55   46.20
  -3   4  -4 1437.66   46.60
  -3   4  -4 1495.55   46.80
   3  -4   4 1443.66   46.10
   3  -4   4 1569.94   46.80
   3  -4   4 1417.66   47.80
   3  -4   4 1432.86   46.90
   3  -4   4 1465.75   46.40
  -4   4  -4  754.42   23.80
  -4   4  -4  762.92   24.00
  -4   4  -4  731.23   24.70
  -4   4  -4  741.63   24.80
  -4   4  -4  734.13   25.50
   4  -4   4  730.33   25.60
   4  -4   4  733.23   25.30
   4  -4   4  742.03   25.90
   4  -4   4  729.83   25.30
   4  -4   4  763.52   24.80
   4  -4   4  730.73   24.60
  -5   4  -4   12.90    3.80
  -5   4  -4   10.70    1.90
  -5   4  -4   12.80    3.20
  -5   4  -4   18.10    2.90
  -5   4  -4   18.10    5.20
   5  -4   4   20.10    4.10
   5  -4   4   13.90    2.50
   5  -4   4   14.80    3.50
   5  -4   4   17.40    3.80
  -6   4  -4   20.60    3.20
  -6   4  -4   19.30    3.20
  -6   4  -4   12.80    4.70
   6  -4   4   15.30    2.70
   6  -4   4   11.00    3.60
   6  -4   4   20.30    3.70
  -7   4  -4   52.59    5.50
  -7   4  -4   60.49    3.40
   7  -4   4   64.79    4.50
   7  -4   4   58.89    3.70
   7  -4   4   58.59    3.10
   7  -4   4   50.39    4.80
  -8   4  -4   15.10    2.70
   8  -4   4   14.80    1.80
   8   3  -4   16.20    2.60
   8   3  -4   13.10    2.50
   7   3  -4   23.40    3.50
   7   3  -4   23.70    3.40
   6   3  -4   45.30    3.70
   6   3  -4   45.30    5.00
   6   3  -4   34.60    5.00
   6   3  -4   47.80    5.10
   5   3  -4   78.49    6.10
   5   3  -4   97.19    6.00
   5   3  -4   75.59    7.80
   5   3  -4   79.69    5.10
   5   3  -4   81.79    6.30
   4   3  -4  192.08    8.90
   4   3  -4  199.38    7.80
   4   3  -4  185.78    8.10
   4   3  -4  193.88    8.50
   3   3  -4   80.59    3.60
   3   3  -4   80.49    3.30
  -3  -3   4   83.19    3.60
   2   3  -4   28.50    1.50
   2   3  -4   27.90    2.00
  -2  -3   4   29.00    1.00
  -2  -3   4   27.60    1.00
  -2  -3   4   26.90    1.20
  -2  -3   4   28.30    1.70
   1   3  -4   22.60    1.20
   1   3  -4   22.60    1.80
   1   3  -4   21.00    1.30
   1   3  -4   20.50    1.00
  -1  -3   4   19.60    1.00
  -1  -3   4   21.30    1.10
  -1  -3   4   20.10    1.20
   0   3  -4  509.05   16.10
   0   3  -4  523.65   16.80
   0   3  -4  508.15   16.90
   0   3  -4  506.45   16.10
   0   3  -4  502.45   16.50
   0   3  -4  504.95   16.30
   0  -3   4  519.25   16.30
   0  -3   4  510.05   16.40
   0  -3   4  538.65   16.30
   0  -3   4  530.15   16.50
  -1   3  -4  477.95   16.30
  -1   3  -4  501.65   15.80
  -1   3  -4  502.65   15.60
  -1   3  -4  455.25   15.50
   1  -3   4  494.95   15.60
   1  -3   4  496.05   15.50
   1  -3   4  492.05   15.70
   1  -3   4  468.45   15.60
  -2   3  -4  257.17    8.40
  -2   3  -4  250.37    8.80
  -2   3  -4  258.87    9.30
   2  -3   4  238.88    8.30
   2  -3   4  245.48    8.30
   2  -3   4  249.68    8.70
   2  -3   4  251.67    8.60
   2  -3   4  244.58    8.40
   2  -3   4  228.08    8.40
  -3   3  -4  674.43   22.20
  -3   3  -4  669.03   22.60
  -3   3  -4  650.73   21.40
  -3   3  -4  659.43   21.80
  -3   3  -4  661.73   21.40
   3  -3   4  666.73   21.70
   3  -3   4  684.53   22.00
   3  -3   4  613.64   21.10
   3  -3   4  707.23   23.80
   3  -3   4  687.73   22.60
   3  -3   4  698.13   21.70
  -4   3  -4  654.63   22.60
  -4   3  -4  667.53   21.00
  -4   3  -4  660.03   20.90
   4  -3   4  652.33   21.60
   4  -3   4  607.34   21.50
   4  -3   4  609.54   22.50
   4  -3   4  688.73   21.80
   4  -3   4  633.14   22.20
   4  -3   4  641.44   22.30
   4  -3   4  638.34   22.00
  -5   3  -4   14.40    4.20
  -5   3  -4   19.10    3.40
  -5   3  -4   19.70    2.80
  -5   3  -4   25.80    3.00
   5  -3   4   19.60    3.40
   5  -3   4   23.20    4.30
   5  -3   4   29.60    5.00
   5  -3   4   21.90    2.90
  -6   3  -4   65.09    4.20
  -6   3  -4   54.59    7.40
   6  -3   4   62.69    5.20
   6  -3   4   62.19    5.40
   6  -3   4   66.19    5.90
   6  -3   4   57.59    6.70
   6  -3   4   63.79    4.30
  -7   3  -4  394.06   12.90
  -7   3  -4  384.36   13.30
   7  -3   4  362.06   13.70
   7  -3   4  369.56   12.70
   7  -3   4  384.76   13.90
   7  -3   4  392.76   13.70
   7  -3   4  391.06   13.90
  -8   3  -4    3.10    1.50
  -8   3  -4    3.80    2.40
   8  -3   4    1.80    1.00
   8  -3   4   -0.60    2.30
   8   2  -4  354.76   12.60
   8   2  -4  337.77   11.80
   7   2  -4   58.09    4.60
   7   2  -4   66.09    7.50
   7   2  -4   49.50    4.20
  -7  -2   4   48.60    4.00
   6   2  -4  114.29    5.60
   6   2  -4  120.49    6.80
   6   2  -4  106.69    7.70
  -6  -2   4   98.69    6.80
   5   2  -4  117.29    6.70
   5   2  -4  103.09    6.30
   5   2  -4  106.09    5.40
   5   2  -4  108.69    6.30
  -5  -2   4  106.09    5.50
   4   2  -4   11.80    2.90
   4   2  -4   12.60    2.90
  -4  -2   4   13.50    1.90
   3   2  -4  191.98    7.70
   3   2  -4  213.28    7.20
  -3  -2   4  225.78    7.50
   2   2  -4  121.39    4.70
   2   2  -4  120.89    4.30
  -2  -2   4  119.39    4.00
  -2  -2   4  119.59    4.20
  -2  -2   4  131.19    4.50
  -2  -2   4  125.09    3.90
   1   2  -4  940.01   29.90
   1   2  -4  949.80   29.50
   1   2  -4  940.91   29.50
  -1  -2   4  918.51   29.40
  -1  -2   4  936.11   29.40
  -1  -2   4  968.50   29.30
   0   2  -4 1009.20   31.70
   0   2  -4 1004.10   31.50
   0   2  -4 1061.69   32.10
   0   2  -4  963.00   31.30
   0  -2   4 1057.19   31.60
   0  -2   4  988.20   31.60
   0  -2   4  987.10   31.60
   0  -2   4 1009.50   31.60
   0  -2   4 1014.90   31.50
  -1   2  -4 1050.39   33.40
  -1   2  -4 1075.79   33.00
  -1   2  -4 1023.60   32.70
  -1   2  -4  961.40   32.70
   1  -2   4 1043.80   32.70
   1  -2   4 1061.79   32.90
   1  -2   4 1063.89   32.90
   1  -2   4 1032.50   32.80
   1  -2   4 1096.29   32.80
  -2   2  -4   28.50    2.30
  -2   2  -4   29.80    1.70
  -2   2  -4   25.30    1.90
  -2   2  -4   29.20    2.60
   2  -2   4   28.90    1.80
   2  -2   4   28.90    1.70
   2  -2   4   22.00    2.30
   2  -2   4   38.30    3.20
   2  -2   4   31.50    2.00
  -3   2  -4  987.70   31.50
  -3   2  -4  958.20   31.40
  -3   2  -4 1016.60   32.10
  -3   2  -4  976.60   31.70
  -3   2  -4  990.10   32.50
   3  -2   4 1019.90   31.60
   3  -2   4  977.20   31.60
   3  -2   4 1026.40   31.70
   3  -2   4 1014.50   32.00
  -4   2  -4  297.77   10.00
  -4   2  -4  303.67   10.20
  -4   2  -4  301.87   11.60
   4  -2   4  285.27   11.50
   4  -2   4  301.77   11.50
   4  -2   4  263.47   11.20
   4  -2   4  286.87   10.80
   4  -2   4  294.97   10.60
   4  -2   4  306.77   11.60
  -5   2  -4   52.39    6.10
  -5   2  -4   43.20    3.40
   5  -2   4   50.59    5.10
   5  -2   4   43.90    5.70
   5  -2   4   43.90    5.10
   5  -2   4   45.70    3.50
  -6   2  -4   15.20    4.90
  -6   2  -4   14.30    2.30
   6  -2   4   15.20    2.30
   6  -2   4   16.00    3.70
   6  -2   4   15.80    3.20
   6  -2   4   15.20    2.80
   6  -2   4   18.50    4.10
  -7   2  -4    4.00    2.30
  -7   2  -4    5.50    1.50
  -7   2  -4    7.60    2.20
   7  -2   4    5.10    1.60
   7  -2   4    5.60    2.70
   7  -2   4    5.20    3.00
   7  -2   4    5.70    2.10
   7  -2   4    4.60    1.60
  -8   2  -4   30.80    2.60
   8  -2   4   29.50    3.40
   8  -2   4   30.70    2.50
   8   1  -4   67.29    4.00
   8   1  -4   64.49    3.70
  -8  -1   4   46.90    5.40
   7   1  -4  158.78    6.60
   7   1  -4  147.19    7.80
   7   1  -4  145.19    9.00
  -7  -1   4  156.98    6.30
  -7  -1   4  126.89    7.80
   6   1  -4    6.50    3.60
   6   1  -4    9.30    2.20
   6   1  -4   11.10    3.10
  -6  -1   4   10.10    3.10
   5   1  -4    4.30    2.60
   5   1  -4    4.80    2.90
   5   1  -4    6.80    2.90
   5   1  -4    3.10    4.00
  -5  -1   4    5.50    2.50
  -5  -1   4    5.40    1.40
   4   1  -4  318.27   11.80
   4   1  -4  315.97   11.80
  -4  -1   4  302.57   11.40
   3   1  -4   18.40    1.50
  -3  -1   4   19.40    0.90
  -3  -1   4   18.50    1.20
  -3  -1   4   18.40    1.50
  -3  -1   4   17.90    1.70
  -3  -1   4   19.10    0.80
   2   1  -4  503.75   15.80
   2   1  -4  505.65   15.80
   2   1  -4  504.45   16.00
   2   1  -4  518.65   16.40
  -2  -1   4  502.05   15.80
  -2  -1   4  506.15   16.10
  -2  -1   4  516.15   15.80
  -2  -1   4  486.35   16.00
   1   1  -4  185.58    6.10
   1   1  -4  192.58    6.20
   1   1  -4  187.78    6.40
   1   1  -4  187.58    6.10
  -1  -1   4  192.68    6.30
  -1  -1   4  184.18    6.00
  -1  -1   4  184.08    6.10
  -1  -1   4  196.48    6.10
  -1  -1   4  189.08    6.10
  -1  -1   4  181.28    6.00
   0   1  -4  311.37   10.30
   0   1  -4  332.77   10.50
   0   1  -4  334.87   10.80
   0  -1   4  324.57   10.30
   0  -1   4  315.47   10.40
   0  -1   4  320.17   10.30
   0  -1   4  329.97   10.40
   0  -1   4  314.17   10.40
  -1   1  -4  598.24   18.70
  -1   1  -4  577.44   18.50
  -1   1  -4  550.94   18.40
  -1   1  -4  618.44   19.10
   1  -1   4  603.64   18.60
   1  -1   4  553.04   18.50
   1  -1   4  571.54   18.60
   1  -1   4  605.14   18.50
   1  -1   4  575.54   18.50
  -2   1  -4  129.09    4.70
  -2   1  -4  126.69    4.70
  -2   1  -4  128.59    5.50
  -2   1  -4  131.99    5.00
   2  -1   4  131.19    4.80
   2  -1   4  138.49    5.00
   2  -1   4  142.69    4.80
  -3   1  -4  367.26   11.80
  -3   1  -4  346.37   12.70
  -3   1  -4  360.86   12.00
  -3   1  -4  345.07   11.70
  -3   1  -4  349.27   12.30
   3  -1   4  348.27   11.80
   3  -1   4  366.76   12.10
   3  -1   4  353.96   11.80
   3  -1   4  367.76   11.90
  -4   1  -4   13.80    2.20
  -4   1  -4   13.90    2.70
  -4   1  -4   10.60    1.60
  -4   1  -4    9.60    3.20
   4  -1   4   17.00    2.80
   4  -1   4   15.80    3.10
   4  -1   4   13.80    2.80
   4  -1   4   19.10    3.70
  -5   1  -4   13.50    3.90
  -5   1  -4    8.90    1.90
   5  -1   4   11.30    2.90
   5  -1   4    6.80    3.00
   5  -1   4    7.70    1.70
   5  -1   4    6.30    2.80
   5  -1   4    4.10    2.30
  -6   1  -4   17.20    2.80
   6  -1   4   11.50    3.20
   6  -1   4   15.70    2.50
   6  -1   4   19.80    3.30
   6  -1   4   13.20    3.70
   6  -1   4   15.30    2.80
  -7   1  -4   -1.90    2.40
  -7   1  -4    1.50    1.40
  -7   1  -4    2.40    3.70
   7  -1   4    0.10    1.80
   7  -1   4    0.60    2.50
   7  -1   4    5.60    2.70
  -8   1  -4   72.19    3.50
   8  -1   4   72.09    3.50
   8  -1   4   72.89    4.20
   8   0  -4    3.00    2.60
   8   0  -4    1.90    4.60
   8   0  -4    2.70    1.70
  -8   0   4    5.90    2.60
   7   0  -4   43.70    5.00
   7   0  -4   45.40    6.50
   7   0  -4   39.20    3.90
  -7   0   4   30.40    6.10
  -7   0   4   46.30    4.20
  -7   0   4   42.20    3.60
   6   0  -4    3.10    3.00
   6   0  -4    3.90    3.40
   6   0  -4    0.30    2.80
  -6   0   4   -1.20    2.90
  -6   0   4   -0.80    2.10
  -6   0   4   -0.80    2.70
   5   0  -4  173.48    7.90
   5   0  -4  166.68    8.10
   5   0  -4  160.68    9.20
   5   0  -4  164.68    7.60
  -5   0   4  165.78    7.20
  -5   0   4  173.28    6.10
   4   0  -4  671.83   23.10
   4   0  -4  662.03   23.10
   4   0  -4  678.93   23.40
  -4   0   4  712.73   22.50
  -4   0   4  693.93   21.50
  -4   0   4  693.43   21.80
   3   0  -4 1001.20   31.30
   3   0  -4 1025.40   31.70
   3   0  -4  991.30   31.20
  -3   0   4 1016.50   31.30
  -3   0   4 1006.70   31.70
  -3   0   4  963.30   31.30
  -3   0   4 1031.20   31.30
  -3   0   4  981.70   31.70
   2   0  -4   89.49    3.50
   2   0  -4   88.99    3.20
  -2   0   4   90.09    3.10
  -2   0   4   87.59    3.30
  -2   0   4   78.49    3.10
  -2   0   4   90.29    3.00
   1   0  -4  404.86   12.70
   1   0  -4  387.76   12.70
   1   0  -4  404.46   12.80
  -1   0   4  410.96   12.60
  -1   0   4  386.16   12.60
  -1   0   4  401.26   12.70
  -1   0   4  406.46   12.60
  -1   0   4  402.96   12.70
  -1   0   4  387.36   12.70
   0   0  -4  109.39    4.10
   0   0  -4  107.19    3.80
   0   0  -4  102.09    3.70
   0   0   4  107.49    3.60
   0   0   4  109.99    3.70
   0   0   4  104.19    3.70
   0   0   4   99.09    3.80
   0   0   4  105.49    3.80
   0   0   4  108.59    3.60
  -1   0  -4  604.14   18.80
  -1   0  -4  558.14   18.70
  -1   0  -4  608.84   19.30
  -1   0  -4  611.94   18.90
   1   0   4  586.94   18.80
   1   0   4  580.44   18.90
   1   0   4  597.34   18.80
   1   0   4  588.44   18.70
   1   0   4  600.34   18.80
  -2   0  -4  200.38    7.10
  -2   0  -4  196.78    7.40
  -2   0  -4  183.68    6.70
   2   0   4  207.58    6.80
   2   0   4  196.98    6.70
   2   0   4  201.28    6.90
  -3   0  -4  305.47   10.70
  -3   0  -4  297.37   10.30
  -3   0  -4  313.07   10.60
  -3   0  -4  317.97   11.40
  -3   0  -4  304.77   10.30
   3   0   4  303.37   10.10
   3   0   4  322.07   10.50
   3   0   4  297.27   10.40
   3   0   4  322.77   10.70
  -4   0  -4   31.40    2.60
  -4   0  -4   28.00    2.50
  -4   0  -4   24.50    3.80
   4   0   4   33.10    3.10
   4   0   4   25.50    3.80
   4   0   4   26.20    3.70
   4   0   4   25.50    3.20
   4   0   4   29.30    3.70
   4   0   4   32.40    4.30
  -5   0  -4   27.50    3.10
  -5   0  -4   21.90    4.50
  -5   0  -4   23.10    3.00
   5   0   4   27.60    4.50
   5   0   4   27.20    4.30
   5   0   4   26.40    2.70
   5   0   4   24.50    4.10
   5   0   4   23.10    3.80
  -6   0  -4   46.00    4.40
  -6   0  -4   45.30    3.30
  -6   0  -4   45.30    3.80
  -6   0  -4   39.30    8.10
   6   0   4   48.40    4.80
   6   0   4   48.10    4.50
   6   0   4   51.09    5.40
   6   0   4   45.40    4.50
   6   0   4   42.20    3.00
  -7   0  -4   60.09    3.20
   7   0   4   55.39    3.90
   7   0   4   55.59    3.60
   7   0   4   53.49    3.30
  -8   0  -4    6.10    1.50
   8   0   4    4.20    1.00
   8   0   4    3.10    2.00
   8  -1  -4   21.60    3.10
   8  -1  -4   18.10    3.00
   8  -1  -4   10.70    4.30
  -8   1   4   23.60    3.00
   7  -1  -4  149.09    7.20
   7  -1  -4  147.89    7.20
   7  -1  -4  142.89    7.90
  -7   1   4  144.39    6.00
  -7   1   4  143.29    8.00
  -7   1   4  150.58    6.60
   6  -1  -4   -0.90    2.70
   6  -1  -4   -2.20    2.40
   6  -1  -4    0.30    3.10
   6  -1  -4    6.90    3.30
  -6   1   4    0.20    3.10
  -6   1   4    2.00    1.80
  -6   1   4    2.30    2.40
  -6   1   4    5.90    2.80
   5  -1  -4   63.29    5.10
   5  -1  -4   68.29    5.70
   5  -1  -4   52.89    5.20
   5  -1  -4   54.49    6.20
   5  -1  -4   58.19    5.60
  -5   1   4   59.39    4.10
  -5   1   4   59.59    3.90
  -5   1   4   58.69    3.90
  -5   1   4   57.69    3.30
   4  -1  -4  369.86   13.40
   4  -1  -4  354.36   12.10
   4  -1  -4  369.26   12.70
   4  -1  -4  355.56   13.50
   4  -1  -4  357.26   13.40
  -4   1   4  378.86   12.70
  -4   1   4  371.06   12.00
  -4   1   4  372.66   12.10
  -4   1   4  384.76   12.60
  -4   1   4  350.56   12.40
  -4   1   4  373.96   11.90
   3  -1  -4  727.43   23.00
   3  -1  -4  701.93   23.20
   3  -1  -4  700.23   23.10
   3  -1  -4  723.03   23.40
  -3   1   4  739.33   23.40
  -3   1   4  739.23   23.00
  -3   1   4  767.42   23.90
  -3   1   4  731.13   23.00
  -3   1   4  735.43   23.40
   2  -1  -4  257.07    8.70
   2  -1  -4  261.37    8.70
   2  -1  -4  257.27    8.80
   2  -1  -4  261.87    8.50
  -2   1   4  256.67    8.70
  -2   1   4  263.67    8.70
  -2   1   4  270.47    8.50
  -2   1   4  268.37    8.50
  -2   1   4  259.27    8.60
  -2   1   4  248.98    8.60
   1  -1  -4   66.69    2.60
   1  -1  -4   69.19    2.60
   1  -1  -4   69.09    3.20
  -1   1   4   69.09    2.60
  -1   1   4   67.49    2.60
  -1   1   4   64.89    2.60
  -1   1   4   69.39    2.60
  -1   1   4   67.69    2.50
  -1   1   4   67.89    2.50
   0  -1  -4  520.05   16.50
   0  -1  -4  519.15   16.90
   0  -1  -4  544.55   16.50
   0  -1  -4  506.25   16.50
   0  -1  -4  532.35   16.80
   0   1   4  521.45   16.50
   0   1   4  505.65   16.50
   0   1   4  508.25   16.40
   0   1   4  507.75   16.40
   0   1   4  540.85   16.50
   0   1   4  515.35   16.50
   0   1   4  521.65   16.40
   0   1   4  505.45   16.30
  -1  -1  -4  152.68    5.40
  -1  -1  -4  161.58    5.50
  -1  -1  -4  160.48    5.40
  -1  -1  -4  159.48    5.80
   1   1   4  154.48    4.90
   1   1   4  153.98    5.30
   1   1   4  144.69    5.50
   1   1   4  158.48    5.30
   1   1   4  150.38    5.40
   1   1   4  156.58    5.40
  -2  -1  -4  175.88    6.70
  -2  -1  -4  158.98    5.80
  -2  -1  -4  174.48    6.00
  -2  -1  -4  153.08    6.40
   2   1   4  173.48    5.90
   2   1   4  171.18    5.90
   2   1   4  176.48    6.50
   2   1   4  168.28    5.40
   2   1   4  172.28    6.10
  -3  -1  -4  154.28    5.90
  -3  -1  -4  137.29    5.10
  -3  -1  -4  127.89    5.00
  -3  -1  -4  133.69    5.40
  -3  -1  -4  137.59    6.40
   3   1   4  140.99    6.80
   3   1   4  140.59    5.40
   3   1   4  122.19    6.20
   3   1   4  130.39    5.50
   3   1   4  131.89    6.30
   3   1   4  137.29    5.40
  -4  -1  -4    6.00    1.50
  -4  -1  -4    4.10    1.50
  -4  -1  -4    3.50    2.90
  -4  -1  -4    2.90    2.50
   4   1   4    3.00    2.60
   4   1   4    1.30    1.80
   4   1   4    7.60    2.10
   4   1   4    4.90    2.10
   4   1   4    1.10    2.10
   4   1   4    6.70    1.50
  -5  -1  -4  151.18    7.60
  -5  -1  -4  174.58    6.80
  -5  -1  -4  163.08    9.50
  -5  -1  -4  171.98    6.70
   5   1   4  183.18    8.60
   5   1   4  178.48    8.10
   5   1   4  177.38    7.80
   5   1   4  169.78    7.60
   5   1   4  182.68    6.90
  -6  -1  -4  109.19    5.20
  -6  -1  -4  106.59    4.70
  -6  -1  -4   85.69   12.00
   6   1   4  106.09    6.80
   6   1   4  104.89    4.90
   6   1   4  107.89    5.80
   6   1   4  107.49    6.00
   6   1   4  103.09    5.80
  -7  -1  -4    1.90    2.50
  -7  -1  -4    2.50    1.40
   7   1   4    1.40    1.40
   7   1   4    4.80    2.80
   7   1   4    0.70    1.10
   7   1   4    2.30    1.80
   8  -2  -4   27.10    4.00
   8  -2  -4   22.90    4.00
  -8   2   4   26.80    3.50
  -8   2   4   29.60    3.50
   7  -2  -4    6.90    2.80
   7  -2  -4   10.30    2.60
   7  -2  -4    8.10    3.20
  -7   2   4   11.40    2.20
  -7   2   4    9.90    3.80
  -7   2   4    8.70    2.30
   6  -2  -4   -1.10    3.20
   6  -2  -4    4.60    3.10
   6  -2  -4   -1.10    3.00
   6  -2  -4   -1.50    3.10
  -6   2   4    0.70    1.70
  -6   2   4    3.10    3.30
  -6   2   4    2.00    2.10
   5  -2  -4   34.70    5.00
   5  -2  -4   25.20    3.50
  -5   2   4   23.30    3.40
  -5   2   4   31.80    3.30
  -5   2   4   30.20    3.60
  -5   2   4   30.80    2.60
   4  -2  -4  720.83   23.60
   4  -2  -4  709.33   23.80
   4  -2  -4  706.03   24.30
   4  -2  -4  712.83   24.40
   4  -2  -4  706.23   24.20
   4  -2  -4  708.83   24.70
  -4   2   4  750.92   23.50
  -4   2   4  726.23   23.00
  -4   2   4  729.03   23.60
  -4   2   4  717.63   23.00
  -4   2   4  710.23   23.10
   3  -2  -4   76.69    3.00
   3  -2  -4   78.39    3.30
   3  -2  -4   78.79    3.60
   3  -2  -4   80.29    3.80
  -3   2   4   83.49    3.40
  -3   2   4   83.09    3.40
  -3   2   4   76.89    3.90
  -3   2   4   82.39    3.60
  -3   2   4   84.89    3.60
  -3   2   4   87.59    3.40
   2  -2  -4   52.19    2.90
   2  -2  -4   48.60    2.50
   2  -2  -4   52.29    2.40
   2  -2  -4   49.60    2.40
   2  -2  -4   51.09    2.60
  -2   2   4   53.59    2.40
  -2   2   4   50.39    2.40
  -2   2   4   54.29    2.40
  -2   2   4   51.89    2.30
  -2   2   4   50.39    2.60
  -2   2   4   61.39    2.30
   1  -2  -4   15.50    1.10
   1  -2  -4   18.10    1.30
   1  -2  -4   14.40    2.20
   1  -2  -4   17.00    1.30
   1  -2  -4   18.10    1.70
   1  -2  -4   18.10    1.80
  -1   2   4   18.90    1.20
  -1   2   4   16.20    1.50
  -1   2   4   17.60    1.10
  -1   2   4   17.40    1.20
  -1   2   4   17.00    1.20
  -1   2   4   17.10    1.30
   0  -2  -4  789.42   24.60
   0  -2  -4  787.02   24.60
   0  -2  -4  766.92   25.00
   0  -2  -4  826.12   24.70
   0  -2  -4  779.82   24.80
   0   2   4  769.52   24.60
   0   2   4  731.53   24.60
   0   2   4  776.82   24.60
   0   2   4  765.92   24.50
   0   2   4  798.52   24.40
   0   2   4  766.52   24.20
   0   2   4  783.22   24.60
  -1  -2  -4  545.85   18.30
  -1  -2  -4  586.64   18.10
  -1  -2  -4  582.64   18.10
  -1  -2  -4  603.44   19.00
  -1  -2  -4  575.64   18.50
   1   2   4  577.94   18.10
   1   2   4  542.45   17.80
   1   2   4  533.95   17.90
   1   2   4  525.05   18.00
  -2  -2  -4    2.80    0.90
  -2  -2  -4    1.30    1.00
  -2  -2  -4    1.80    1.10
  -2  -2  -4    1.80    1.30
  -2  -2  -4    4.00    1.30
   2   2   4    2.40    0.70
   2   2   4    2.20    0.90
   2   2   4    2.60    1.00
   2   2   4    2.40    1.30
  -3  -2  -4  613.04   20.50
  -3  -2  -4  589.84   19.90
  -3  -2  -4  637.34   19.30
   3   2   4  601.14   19.50
   3   2   4  575.84   20.30
   3   2   4  614.04   20.50
   3   2   4  587.54   19.60
   3   2   4  589.14   20.20
   3   2   4  570.64   20.10
  -4  -2  -4  137.49    5.30
  -4  -2  -4  124.89    5.20
  -4  -2  -4  126.09    7.00
   4   2   4  126.99    5.30
   4   2   4  126.19    5.90
   4   2   4  129.99    6.20
  -5  -2  -4   77.79    8.70
  -5  -2  -4  106.39    4.80
  -5  -2  -4  101.09    4.70
   5   2   4   96.39    6.00
   5   2   4   92.99    5.40
   5   2   4  104.59    4.70
   5   2   4  105.89    6.50
  -6  -2  -4    0.60    1.60
  -6  -2  -4    0.60    1.70
   6   2   4    3.80    2.10
   6   2   4    5.50    3.30
   6   2   4    4.10    2.50
   6   2   4    1.50    2.50
  -7  -2  -4    0.50    1.40
  -7  -2  -4    1.60    2.00
   7   2   4    0.10    1.90
   7   2   4    3.60    2.40
   7   2   4    1.20    1.10
   8  -3  -4    5.50    1.70
  -8   3   4    5.10    2.40
  -8   3   4    4.90    2.10
   7  -3  -4    8.90    3.90
   7  -3  -4    5.20    3.00
   7  -3  -4   13.30    3.20
  -7   3   4    9.30    1.80
  -7   3   4   13.60    3.80
  -7   3   4   17.60    3.20
   6  -3  -4  145.49    7.90
   6  -3  -4  120.39    7.10
   6  -3  -4  149.09    8.50
   6  -3  -4  141.69    7.80
   6  -3  -4  129.19    6.60
  -6   3   4  145.99    5.80
  -6   3   4  141.59    7.10
  -6   3   4  142.99    7.60
  -6   3   4  143.69    6.00
   5  -3  -4  182.98    8.50
   5  -3  -4  177.48    9.20
   5  -3  -4  180.78    9.10
   5  -3  -4  193.98    9.00
  -5   3   4  184.78    7.00
  -5   3   4  182.48    7.90
  -5   3   4  194.88    7.80
  -5   3   4  180.78    7.20
   4  -3  -4   33.50    4.90
   4  -3  -4   30.30    3.80
   4  -3  -4   29.60    5.10
   4  -3  -4   35.50    4.30
   4  -3  -4   33.20    4.60
  -4   3   4   28.70    2.80
  -4   3   4   27.30    3.10
  -4   3   4   32.40    2.80
  -4   3   4   24.10    2.70
  -4   3   4   30.80    2.70
   3  -3  -4   97.39    4.40
   3  -3  -4  102.29    4.80
   3  -3  -4  100.69    4.20
   3  -3  -4  104.19    5.80
  -3   3   4   96.79    4.30
  -3   3   4   95.99    4.40
  -3   3   4   96.59    4.00
  -3   3   4   99.79    4.40
  -3   3   4   96.09    4.10
  -3   3   4  100.29    4.10
   2  -3  -4  131.39    4.90
   2  -3  -4  138.79    5.00
   2  -3  -4  138.69    5.50
  -2   3   4  136.79    5.00
  -2   3   4  131.19    5.00
  -2   3   4  133.59    5.20
  -2   3   4  127.09    4.30
  -2   3   4  132.19    4.90
   1  -3  -4  430.46   14.00
   1  -3  -4  436.16   13.80
   1  -3  -4  429.56   14.20
   1  -3  -4  430.66   14.00
   1  -3  -4  423.36   14.00
   1  -3  -4  435.76   14.60
  -1   3   4  431.46   14.00
  -1   3   4  448.56   14.10
  -1   3   4  428.86   14.00
  -1   3   4  422.26   14.00
  -1   3   4  417.56   14.20
  -1   3   4  441.56   13.50
   0  -3  -4   67.19    3.00
   0  -3  -4   67.79    3.30
   0  -3  -4   66.79    3.20
   0  -3  -4   69.99    3.40
   0  -3  -4   67.99    3.00
   0   3   4   67.89    3.20
   0   3   4   70.19    2.80
   0   3   4   65.29    3.40
   0   3   4   68.39    2.90
   0   3   4   67.09    2.50
   0   3   4   67.69    2.80
   0   3   4   69.79    2.90
   0   3   4   67.29    2.80
   0   3   4   65.39    2.60
  -1  -3  -4    8.80    1.60
  -1  -3  -4   11.80    1.70
  -1  -3  -4    8.30    1.10
  -1  -3  -4   10.30    1.40
  -1  -3  -4    8.50    1.50
   1   3   4   10.20    1.30
   1   3   4    9.10    1.40
  -2  -3  -4   20.60    1.90
  -2  -3  -4   18.90    1.90
  -2  -3  -4   16.60    2.50
  -2  -3  -4   17.50    2.40
  -2  -3  -4   16.10    2.30
   2   3   4   16.70    2.30
   2   3   4   18.10    2.00
   2   3   4   18.90    3.20
   2   3   4   18.00    1.80
   2   3   4   19.40    1.50
  -3  -3  -4   68.09    3.40
  -3  -3  -4   68.69    4.30
  -3  -3  -4   68.59    3.40
  -3  -3  -4   69.89    4.60
   3   3   4   65.69    4.60
   3   3   4   66.89    4.70
   3   3   4   72.79    5.10
   3   3   4   67.89    3.60
   3   3   4   64.69    5.00
  -4  -3  -4  197.58    7.40
  -4  -3  -4  204.28    7.50
  -4  -3  -4  203.18    9.40
   4   3   4  193.38    8.20
   4   3   4  202.58    7.50
   4   3   4  181.08    8.90
   4   3   4  201.58    8.80
   4   3   4  197.68    8.20
  -5  -3  -4   64.19    3.90
  -5  -3  -4   55.19    7.50
  -5  -3  -4   64.79    3.90
   5   3   4   65.49    3.80
   5   3   4   60.99    4.90
   5   3   4   67.99    5.60
   5   3   4   68.79    4.70
   5   3   4   56.89    4.40
   5   3   4   52.69    6.90
  -6  -3  -4   15.70    2.60
  -6  -3  -4   14.40    2.20
   6   3   4   13.10    3.30
   6   3   4   11.50    2.60
  -7  -3  -4   15.50    2.80
  -7  -3  -4   22.40    3.30
   7   3   4   16.60    3.10
   7   3   4   15.80    2.80
   7   3   4   14.20    1.70
   8  -4  -4    3.50    1.80
  -8   4   4   -1.10    3.10
   7  -4  -4   53.59    5.40
  -7   4   4   49.20    4.60
  -7   4   4   52.99    4.10
  -7   4   4   58.99    3.70
   6  -4  -4   42.40    6.70
   6  -4  -4   44.70    4.70
   6  -4  -4   46.40    5.30
   6  -4  -4   49.30    5.70
  -6   4   4   44.70    3.80
  -6   4   4   45.80    4.70
  -6   4   4   43.60    5.60
   5  -4  -4   73.79    6.50
   5  -4  -4   67.89    5.70
   5  -4  -4   74.39    5.90
   5  -4  -4   74.19    6.90
   5  -4  -4   71.79    4.80
  -5   4   4   64.69    4.80
  -5   4   4   70.99    4.10
  -5   4   4   67.69    4.40
   4  -4  -4  102.29    6.60
   4  -4  -4  101.29    6.20
   4  -4  -4  103.99    6.90
   4  -4  -4  105.09    6.70
   4  -4  -4  102.69    5.80
  -4   4   4   99.69    5.40
  -4   4   4   99.79    4.70
  -4   4   4  101.89    4.70
  -4   4   4  102.49    5.00
  -4   4   4  106.39    4.60
   3  -4  -4   13.60    3.20
   3  -4  -4   11.20    2.00
   3  -4  -4   12.70    2.60
   3  -4  -4   15.80    2.40
   3  -4  -4   16.40    2.90
   3  -4  -4   11.20    2.10
   3  -4  -4   15.40    3.60
  -3   4   4   14.30    1.80
  -3   4   4   12.70    2.30
  -3   4   4   13.90    2.00
  -3   4   4   12.60    1.90
  -3   4   4   15.20    2.10
  -3   4   4   13.00    2.20
   2  -4  -4  140.39    5.30
   2  -4  -4  142.69    6.00
   2  -4  -4  136.19    5.40
   2  -4  -4  139.29    5.00
  -2   4   4  135.39    5.30
  -2   4   4  130.99    5.30
  -2   4   4  138.09    5.20
  -2   4   4  135.49    5.20
  -2   4   4  135.29    5.10
  -2   4   4  128.99    5.60
   1  -4  -4   69.99    3.80
   1  -4  -4   61.29    4.50
   1  -4  -4   69.29    4.40
   1  -4  -4   68.19    2.80
   1  -4  -4   75.29    3.50
   1  -4  -4   69.69    3.40
   1  -4  -4   69.59    3.30
  -1   4   4   71.09    3.00
  -1   4   4   70.69    3.10
  -1   4   4   69.29    3.40
  -1   4   4   67.99    2.60
  -1   4   4   62.79    3.30
  -1   4   4   69.69    3.10
  -1   4   4   67.69    3.10
   0  -4  -4  410.46   13.70
   0  -4  -4  414.66   13.50
   0  -4  -4  421.36   13.90
   0  -4  -4  409.76   13.60
   0  -4  -4  409.86   14.00
   0   4   4  402.16   13.50
   0   4   4  399.86   13.30
   0   4   4  406.36   13.50
   0   4   4  420.86   13.50
   0   4   4  417.56   13.60
   0   4   4  415.86   13.70
   0   4   4  410.66   13.30
   0   4   4  417.16   13.20
  -1  -4  -4   26.30    2.30
  -1  -4  -4   25.30    2.20
  -1  -4  -4   26.90    2.50
  -1  -4  -4   27.00    2.40
  -1  -4  -4   30.10    3.00
  -1  -4  -4   26.70    2.20
   1   4   4   25.60    1.90
   1   4   4   29.00    2.20
   1   4   4   25.80    1.50
   1   4   4   28.10    2.00
  -2  -4  -4   93.39    4.50
  -2  -4  -4  104.59    4.20
  -2  -4  -4   99.69    5.30
  -2  -4  -4   92.69    4.90
  -2  -4  -4  100.89    4.20
   2   4   4   94.09    4.90
   2   4   4  106.59    6.00
   2   4   4   94.59    4.20
   2   4   4   98.29    5.10
   2   4   4   92.79    4.20
   2   4   4   87.49    5.60
  -3  -4  -4   47.30    2.80
  -3  -4  -4   50.39    4.50
  -3  -4  -4   53.79    3.20
   3   4   4   46.90    4.60
   3   4   4   51.59    3.10
   3   4   4   45.20    5.00
   3   4   4   47.60    3.70
   3   4   4   38.40    4.60
   3   4   4   46.80    4.30
  -4  -4  -4  318.47   10.90
  -4  -4  -4  309.27   13.10
  -4  -4  -4  301.97   10.80
   4   4   4  309.97   11.20
   4   4   4  306.97   12.00
   4   4   4  306.07   10.80
   4   4   4  317.67   11.70
   4   4   4  305.57   11.70
   4   4   4  306.17   12.00
  -5  -4  -4    0.70    1.90
  -5  -4  -4    2.90    5.50
  -5  -4  -4    0.60    2.10
   5   4   4    1.50    2.00
   5   4   4   -0.70    2.30
   5   4   4    0.90    2.30
   5   4   4    5.10    3.00
   5   4   4   -0.80    1.90
   5   4   4   -2.40    3.60
  -6  -4  -4   92.49    4.50
  -6  -4  -4   95.39    4.50
   6   4   4   90.39    4.50
   6   4   4   89.59    4.80
   6   4   4   91.39    4.50
   6   4   4   96.79    5.00
  -7  -4  -4   16.90    2.70
  -7  -4  -4   17.70    3.10
   7   4   4   18.50    1.90
   7   4   4   20.00    2.10
   8  -5  -4   13.70    2.40
  -8   5   4   21.20    3.10
   7  -5  -4   15.90    2.80
   7  -5  -4   16.40    3.00
  -7   5   4    9.50    2.80
  -7   5   4   12.20    1.80
  -7   5   4   11.60    4.10
   6  -5  -4    6.60    4.50
   6  -5  -4   10.30    3.40
   6  -5  -4    8.50    2.50
   6  -5  -4   11.60    3.60
  -6   5   4   10.40    1.80
  -6   5   4    7.50    4.00
  -6   5   4    2.20    3.00
  -6   5   4    7.20    2.30
   5  -5  -4   67.29    6.20
   5  -5  -4   63.79    5.60
   5  -5  -4   61.69    6.00
   5  -5  -4   59.99    4.90
   5  -5  -4   73.39    7.30
  -5   5   4   65.69    3.90
  -5   5   4   68.09    4.60
  -5   5   4   63.89    4.50
  -5   5   4   65.39    4.10
   4  -5  -4  117.69    8.80
   4  -5  -4  107.59    6.80
  -4   5   4  109.09    4.90
  -4   5   4  107.69    4.90
  -4   5   4  105.89    5.00
  -4   5   4  105.89    5.70
  -4   5   4  102.59    5.40
   3  -5  -4  100.59    5.60
   3  -5  -4  104.79    7.60
   3  -5  -4  104.89    6.50
   3  -5  -4   97.99    5.60
   3  -5  -4   97.39    5.40
   3  -5  -4  103.49    5.70
   3  -5  -4   98.29    5.80
  -3   5   4  100.49    5.00
  -3   5   4  102.29    4.50
  -3   5   4  102.99    4.70
  -3   5   4  102.79    4.50
  -3   5   4  103.29    4.50
   2  -5  -4  169.18    6.50
   2  -5  -4  168.78    7.80
   2  -5  -4  165.38    8.20
   2  -5  -4  170.48    6.80
   2  -5  -4  172.98    7.40
   2  -5  -4  166.68    8.60
  -2   5   4  167.98    6.90
  -2   5   4  177.68    6.50
  -2   5   4  172.78    6.60
  -2   5   4  179.58    6.70
  -2   5   4  176.18    6.30
  -2   5   4  174.38    6.40
   1  -5  -4 1100.49   34.70
   1  -5  -4 1106.19   35.20
   1  -5  -4 1115.69   34.40
   1  -5  -4 1109.89   34.90
   1  -5  -4 1083.59   36.00
   1  -5  -4 1104.29   35.50
  -1   5   4 1110.49   34.70
  -1   5   4 1083.49   34.80
  -1   5   4 1103.69   34.30
  -1   5   4 1070.09   35.00
  -1   5   4 1104.69   34.90
  -1   5   4 1062.19   34.60
  -1   5   4 1065.89   34.50
   0  -5  -4  233.28    8.10
   0  -5  -4  227.68    8.70
   0  -5  -4  233.58    8.60
   0  -5  -4  227.48    8.20
   0   5   4  222.88    7.70
   0   5   4  215.38    8.40
   0   5   4  221.28    7.50
   0   5   4  222.68    8.70
   0   5   4  229.18    8.10
   0   5   4  222.18    8.10
   0   5   4  235.08    8.00
   0   5   4  227.48    8.60
   0   5   4  230.38    7.80
  -1  -5  -4   84.79    4.10
  -1  -5  -4   84.89    4.50
  -1  -5  -4   66.99    5.80
  -1  -5  -4   76.09    4.70
  -1  -5  -4   78.19    4.30
  -1  -5  -4   78.89    4.10
  -1  -5  -4   81.39    3.80
   1   5   4   78.99    3.90
   1   5   4   87.59    3.80
   1   5   4   66.89    4.40
   1   5   4   82.89    4.50
   1   5   4   80.79    5.00
   1   5   4   78.69    3.90
  -2  -5  -4   19.40    2.40
  -2  -5  -4   18.80    2.40
  -2  -5  -4   17.60    2.60
  -2  -5  -4   16.90    3.10
  -2  -5  -4   15.20    3.00
   2   5   4   18.10    2.60
   2   5   4   16.80    3.20
   2   5   4   15.80    2.30
   2   5   4   17.90    3.00
   2   5   4   18.10    2.80
  -3  -5  -4   50.39    3.50
  -3  -5  -4   53.69    5.00
  -3  -5  -4   49.20    3.50
   3   5   4   48.00    3.90
   3   5   4   57.99    4.90
   3   5   4   44.50    3.10
   3   5   4   48.80    4.40
   3   5   4   51.59    4.20
  -4  -5  -4   31.20    5.70
  -4  -5  -4   23.90    3.10
  -4  -5  -4   22.40    3.20
   4   5   4   26.00    3.60
   4   5   4   33.50    4.40
   4   5   4   23.00    3.50
   4   5   4   19.30    3.00
   4   5   4   25.00    3.40
   4   5   4   23.10    2.60
  -5  -5  -4  399.76   19.10
  -5  -5  -4  461.75   15.50
  -5  -5  -4  483.45   15.70
   5   5   4  457.55   15.10
   5   5   4  463.15   15.80
   5   5   4  468.75   16.30
   5   5   4  474.65   16.80
   5   5   4  459.65   16.10
   5   5   4  456.75   16.40
  -6  -5  -4    1.40    2.70
  -6  -5  -4    2.50    2.00
  -6  -5  -4    5.40    2.00
   6   5   4    4.80    4.50
   6   5   4    7.80    2.00
   6   5   4    6.40    1.60
  -7  -5  -4    8.70    2.00
   7   5   4   11.40    1.80
   7   5   4   12.00    2.60
   7  -6  -4   17.30    3.10
   7  -6  -4   22.60    2.70
  -7   6   4   24.00    3.80
  -7   6   4   18.40    2.60
  -7   6   4   18.00    2.50
   6  -6  -4   27.80    5.00
   6  -6  -4   18.00    4.00
   6  -6  -4   16.70    3.70
   6  -6  -4   24.40    4.50
  -6   6   4   28.60    3.30
  -6   6   4   19.70    3.30
  -6   6   4   24.50    3.70
   5  -6  -4   65.79    5.90
   5  -6  -4   55.89    5.00
   5  -6  -4   70.59    6.40
   5  -6  -4   59.09    6.10
  -5   6   4   62.19    4.60
  -5   6   4   50.89    5.10
  -5   6   4   59.59    3.90
  -5   6   4   61.09    3.70
  -5   6   4   52.29    4.20
   4  -6  -4   35.60    5.30
   4  -6  -4   20.60    3.50
   4  -6  -4   26.20    4.30
   4  -6  -4   27.70    5.00
   4  -6  -4   28.90    5.40
  -4   6   4   31.40    3.50
  -4   6   4   25.00    3.60
  -4   6   4   35.20    3.20
  -4   6   4   28.00    2.80
  -4   6   4   26.70    3.50
   3  -6  -4   16.80    6.70
   3  -6  -4   18.70    4.60
   3  -6  -4   16.70    3.10
   3  -6  -4   16.80    3.00
  -3   6   4   17.40    2.30
  -3   6   4   16.10    2.60
  -3   6   4   18.60    2.30
  -3   6   4   17.60    3.40
  -3   6   4   17.90    3.10
  -3   6   4   16.70    2.60
   2  -6  -4   62.19    7.10
   2  -6  -4   77.89    5.10
   2  -6  -4   78.79    5.60
   2  -6  -4   73.49    5.10
   2  -6  -4   75.19    8.60
   2  -6  -4   84.29    6.00
   2  -6  -4   72.99    5.40
  -2   6   4   78.19    3.80
  -2   6   4   77.79    3.80
  -2   6   4   72.39    4.00
  -2   6   4   82.79    6.00
  -2   6   4   75.69    5.00
  -2   6   4   74.69    4.10
  -2   6   4   79.49    3.90
   1  -6  -4  257.87   10.60
   1  -6  -4  238.48   11.00
   1  -6  -4  245.18   10.00
   1  -6  -4  265.17   10.10
   1  -6  -4  244.68   10.90
   1  -6  -4  250.47    9.90
   1  -6  -4  256.47    9.20
  -1   6   4  252.27    9.50
  -1   6   4  260.37    9.10
  -1   6   4  251.97    9.10
  -1   6   4  244.68    9.70
  -1   6   4  257.37    9.20
  -1   6   4  240.28    9.30
  -1   6   4  256.87    9.00
   0  -6  -4  320.57   12.20
   0  -6  -4  333.77   11.40
   0  -6  -4  292.17   13.40
   0  -6  -4  307.97   12.10
   0  -6  -4  320.57   11.90
   0  -6  -4  382.76   12.70
   0  -6  -4  334.37   11.80
   0   6   4  331.87   11.40
   0   6   4  326.57   12.00
   0   6   4  310.27   11.60
   0   6   4  350.76   11.60
   0   6   4  345.97   11.20
   0   6   4  335.67   11.70
   0   6   4  329.87   11.60
   0   6   4  301.87   12.20
  -1  -6  -4   85.89    4.20
  -1  -6  -4   81.19    5.80
  -1  -6  -4   83.79    4.30
  -1  -6  -4   85.89    5.00
  -1  -6  -4   78.89    5.20
   1   6   4   85.59    4.70
   1   6   4   80.79    5.40
   1   6   4   79.19    5.00
   1   6   4   88.79    4.50
   1   6   4   80.69    4.10
   1   6   4   83.49    4.50
   1   6   4   77.59    4.20
  -2  -6  -4  122.29    5.60
  -2  -6  -4  122.19    5.40
  -2  -6  -4  115.19    5.90
  -2  -6  -4  117.79    6.60
  -2  -6  -4  116.39    7.10
   2   6   4  122.39    5.80
   2   6   4  119.49    5.30
   2   6   4  120.89    6.10
   2   6   4  132.29    5.90
   2   6   4  114.89    6.20
  -3  -6  -4   40.70    6.70
  -3  -6  -4   37.40    3.30
  -3  -6  -4   32.00    3.10
  -3  -6  -4   32.00    4.10
   3   6   4   32.00    2.90
   3   6   4   41.90    4.10
   3   6   4   28.20    3.70
   3   6   4   37.00    3.70
   3   6   4   31.80    3.60
  -4  -6  -4  216.08    8.20
  -4  -6  -4  195.68    8.40
  -4  -6  -4  188.78   11.10
   4   6   4  204.38    8.20
   4   6   4  208.38    7.80
   4   6   4  213.78    8.70
   4   6   4  211.78    8.80
   4   6   4  206.38    9.10
  -5  -6  -4   31.80    4.60
  -5  -6  -4   35.70    3.20
  -5  -6  -4   43.50    3.60
   5   6   4   34.90    5.20
   5   6   4   34.50    3.30
   5   6   4   33.80    5.00
  -6  -6  -4   12.20    2.00
  -6  -6  -4   17.10    3.10
   6   6   4   13.40    2.30
   6   6   4   11.30    1.60
   6   6   4   14.50    4.50
   7  -7  -4    4.70    1.60
   7  -7  -4    2.00    1.90
  -7   7   4    7.00    3.00
  -7   7   4    4.80    1.50
  -7   7   4    3.80    1.60
   6  -7  -4   42.00    5.10
   6  -7  -4   44.10    3.70
  -6   7   4   36.80    4.90
  -6   7   4   39.00    4.50
  -6   7   4   43.10    3.00
   5  -7  -4   17.40    3.30
   5  -7  -4   10.90    3.70
  -5   7   4   16.00    2.50
  -5   7   4   19.40    2.40
  -5   7   4   14.90    2.70
  -5   7   4   15.30    2.80
  -5   7   4   18.20    2.80
   4  -7  -4    6.70    4.80
   4  -7  -4   16.00    6.30
   4  -7  -4    0.20    6.50
   4  -7  -4    5.10    3.50
   4  -7  -4    4.30    3.60
   4  -7  -4   -1.20    2.90
   4  -7  -4    2.10    3.00
  -4   7   4    5.30    1.80
  -4   7   4    2.90    1.90
  -4   7   4    5.40    1.90
  -4   7   4    2.70    2.30
  -4   7   4    1.50    2.20
   3  -7  -4   76.09    6.60
   3  -7  -4   80.69    6.00
   3  -7  -4   72.69   11.40
   3  -7  -4   81.49    6.40
   3  -7  -4   81.49    6.00
  -3   7   4   79.79    5.70
  -3   7   4   80.99    4.30
  -3   7   4   76.69    4.60
  -3   7   4   85.59    4.30
  -3   7   4   81.29    4.70
  -3   7   4   83.09    4.70
   2  -7  -4   88.99    8.40
   2  -7  -4  102.99    6.50
   2  -7  -4  101.69    7.00
   2  -7  -4  121.69    6.90
  -2   7   4  106.79    5.40
  -2   7   4  107.09    4.90
  -2   7   4  102.29    6.30
  -2   7   4  112.89    4.90
  -2   7   4  109.79    5.00
  -2   7   4  109.59    5.10
   1  -7  -4   91.79    5.00
   1  -7  -4   94.19    5.90
   1  -7  -4   75.49    6.60
   1  -7  -4   86.99    5.90
   1  -7  -4   89.29    5.80
   1  -7  -4   79.39    5.60
  -1   7   4   92.39    5.20
  -1   7   4   94.09    4.60
  -1   7   4   91.79    4.30
  -1   7   4   92.39    4.80
   0  -7  -4   41.10    4.20
   0  -7  -4   49.99    4.90
   0  -7  -4   47.10    3.60
   0  -7  -4   49.20    4.80
   0  -7  -4   55.19    4.80
   0  -7  -4   44.70    5.50
   0   7   4   37.20    4.90
   0   7   4   45.30    3.10
  -1  -7  -4   20.70    3.70
  -1  -7  -4   12.70    2.90
  -1  -7  -4   15.70    2.30
  -1  -7  -4   12.60    3.50
  -1  -7  -4   18.20    2.80
   1   7   4   15.40    2.20
   1   7   4   13.00    2.70
   1   7   4   17.20    2.60
   1   7   4   13.10    2.50
  -2  -7  -4   63.99    4.30
  -2  -7  -4   63.79    5.80
  -2  -7  -4   65.59    3.60
  -2  -7  -4   67.19    5.20
  -2  -7  -4   56.99    6.20
   2   7   4   57.29    4.70
   2   7   4   63.59    3.80
   2   7   4   63.29    5.20
   2   7   4   65.39    4.40
   2   7   4   64.99    4.30
  -3  -7  -4   40.90    3.70
  -3  -7  -4   39.90    5.00
  -3  -7  -4   47.20    3.30
  -3  -7  -4   35.00    5.20
   3   7   4   39.20    3.70
   3   7   4   52.39    4.50
   3   7   4   44.10    4.00
   3   7   4   43.00    3.90
  -4  -7  -4   52.59    3.60
  -4  -7  -4   43.50    4.10
   4   7   4   44.90    3.90
   4   7   4   42.50    2.90
   4   7   4   42.40    4.80
   4   7   4   52.89    5.20
   4   7   4   49.99    4.10
  -5  -7  -4    5.30    1.90
  -5  -7  -4    4.70    2.20
   5   7   4    2.10    2.50
   5   7   4    6.40    3.40
   5   7   4    3.60    1.70
   5   7   4    3.90    1.40
  -6  -7  -4   41.40    3.80
   6   7   4   37.10    4.10
   6   7   4   40.60    2.80
   6   7   4   38.40    4.40
   7  -8  -4    9.30    2.80
   7  -8  -4    6.60    1.80
  -7   8   4    9.50    2.00
  -7   8   4    8.80    2.20
   6  -8  -4   47.00    3.40
   6  -8  -4   46.00    4.30
  -6   8   4   41.70    3.20
  -6   8   4   30.50    4.70
  -6   8   4   38.40    2.90
   5  -8  -4   48.80    5.70
   5  -8  -4   47.60    5.00
  -5   8   4   50.99    3.10
  -5   8   4   51.29    4.40
  -5   8   4   46.10    4.40
   4  -8  -4    5.40    5.10
   4  -8  -4   13.50    3.40
   4  -8  -4   12.90    3.50
   4  -8  -4   16.80    3.90
  -4   8   4   15.80    3.80
  -4   8   4   13.90    2.50
  -4   8   4   13.50    3.00
  -4   8   4   10.00    3.10
  -4   8   4   11.00    2.30
   3  -8  -4   20.50    6.40
   3  -8  -4   17.60    3.90
   3  -8  -4   23.70    5.30
   3  -8  -4   14.20    3.70
  -3   8   4   20.20    3.40
  -3   8   4   14.70    3.40
  -3   8   4   23.30    3.30
  -3   8   4   17.30    3.20
  -3   8   4   25.60    3.60
  -3   8   4   20.70    3.40
   2  -8  -4   82.59    6.70
   2  -8  -4   79.29    6.70
   2  -8  -4   80.49    6.00
  -2   8   4   84.89    5.40
  -2   8   4   83.39    4.50
  -2   8   4   86.09    5.00
[truncated: 553,856 more chars]
